# Supplementary material for: Dietary fibers boost gut microbiota-produced B vitamin pool and alter host immune landscape
Source: Research Square preprint supplement (doi:10.21203/rs.3.rs-1563674/v2), 2022-05-25
Supplement: Supplementary file 2 [file c6dea8649e595c6f1408eaf3.xlsx]

## Sheet: Legends
Supplementary Table 1: Composition of rodent diets.
Composition of all diets used in this study: fiber-rich 1 (FR1), fiber-rich 2 (FR2), inulin-supplemented (IN), fiber-supplemented (FS) or fiber-free (FF).
Supplementary Table 2: CyTOF antibody panel.
Antibody panel used to stain cells isolated from colonic lamina propria, lung, and spleen samples for CyTOF analysis.
Supplementary Table 3: Microbiome composition by 16S rRNA gene sequencing.
Composition of fecal microbiota by 16S rRNA gene sequencing of specific-pathogen-free (SPF) mice before (day 0) and after 40 days of feeding (day 40) for all diets: fiber-rich 1 (FR1), fiber-rich 2 (FR2), inulin-supplemented (IN), fiber-supplemented (FS) or fiber-free (FF).
Supplementary Table 4: Cecum metabolome of germ-free (GF) and gnotobiotic (14SM) mice.
Concentrations of metabolites detected by CE-TOFMS in cecal contents of gnotobiotic (14SM), and germfree (GF) mice fed a fiber-rich 1 (FR1) or fiber-free (FF) diet.
Supplementary Table 5: Cecum metabolome of specific-pathogen-free (SPF) mice.
Concentrations of metabolites detected by CE-TOFMS in cecal contents of specific-pathogen-free (SPF) mice fed all diets: fiber-rich 1 (FR1), fiber-rich 2 (FR2), inulin-supplemented (IN), fiber-supplemented (FS) or fiber-free (FF).
Supplementary Table 6: Serum metabolome of specific-pathogen-free (SPF) mice.
Concentrations of metabolites detected by CE-TOFMS in serum of specific-pathogen-free (SPF) mice fed all diets: fiber-rich 1 (FR1), fiber-rich 2 (FR2), inulin-supplemented (IN), fiber-supplemented (FS) or fiber-free (FF).
Supplementary Table 7: B vitamin metatranscriptome.
Relative abundance of transcripts mapping to bacterial genes involved in synthesis (S) or downstream utilization (D) of enzymes involved in B vitamin metabolism in cecal contents of specific-pathogen-free (SPF) mice fed an inulin-supplemented (IN), fiber-rich 2 (FR2), or fiber-free (FF) diet.
Supplementary Table 8: Metatranscriptome mapped by Enzyme Classification (EC) identifiers.
Transcripts mapping to bacterial genes with the specified Enzyme Classification (EC) identifier, expressed as counts per million reads, in cecal contents of specific-pathogen-free (SPF) mice fed an inulin-supplemented (IN), fiber-rich 2 (FR2), or fiber-free (FF) diet.

## Sheet: Table S1
Supplementary Table 1: Composition of rodent diets.
Composition of all diets used in this study: fiber-rich 1 (FR1), fiber-rich 2 (FR2), inulin-supplemented (IN), fiber-supplemented (FS) or fiber-free (FF).
Fiber-rich 1 (FR1) diet				Fiber-rich 1 (FR1) diet				Fiber-rich 2 (FR2) diet				Inulin-supplemented (IN) diet				Fiber-supplemented (FS) diet				Fiber-free (FF) diet
SPF				GF/14SM				SPF				SPF				SPF				SPF/GF/14SM
Rat and Mouse Breeder and Grower 801722				R04				Autoclavable Rodent Breeder Diet 5013				U8978 version Omni rodent diet control close to Envigo TD.130343				U8978 version Omni rodent diet control close to Envigo TD.130343				U8978 version Omni rodent diet control close to Envigo TD.130343
Special Diets Services				SAFE				LabDiet				SAFE				SAFE				SAFE
	% by wt	% kcal			% by wt	% kcal			% by wt	% kcal			% by wt	% kcal			% by wt	% kcal			% by wt	% kcal
Protein	18.4	22		Protein	16.1	19.3		Protein	21.6	25.1		Protein	23.8	23.6		Protein	23.8	23.6		Protein	23.8	23.6
Carbohydrate	61.6	68.9		Carbohydrate	64.3	72.4		Carbohydrate	58.8	61.6		Carbohydrate	47.7	42.4		Carbohydrate	47.7	42.4		Carbohydrate	47.7	42.4
Fat	3.4	9.1		Fat	3.1	8.4		Fat	5.1	13.3		Fat	15.3	34		Fat	15.3	34		Fat	15.3	34
Ingredients:				Ingredients:				Ingredients:				Ingredients:		g/kg		Ingredients:		g/kg		Ingredients:		g/kg
Wheat, wheatfeed, barley, de-hulled extracted toasted soya, maize, macro minerals, soya oil, potato protein, hydrolised wheat gluten, full fat soya, maize gluten meal, vitamins, micro minerals, amino acids				Barley, wheat, maize, soybean meal, wheat bran, hydrolyzed fish proteins, dicalcium phosphate, pre-mixture of minerals, calcium carbonate, pre-mixture of vitamins				Ground corn, dehulled soybean meal, wheat middlings, corn gluten meal, fish meal, ground wheat, porcine animal fat preserved with BHA, dehydrated alfalfa meal, brewers dried yeast, salt, calcium carbonate, ground oats, ground soybean hulls, cane molasses, dried beet pulp, wheat germ, dicalcium phosphate, monocalcium phosphate, magnesium oxide, pyridoxine hydrochloride, menadione dimethylpyrimidin…				Dextrose		399.816		Dextrose		399.816		Dextrose		444.235
												Casein		269		Casein		269		Casein		269
												Crude cellulose		80		Crude cellulose		80		Crude cellulose		80
												Lard		75		Lard		75		Lard		75
												Corn oil		75		Corn oil		75		Corn oil		75
												Inulin derived from chicory root (Fisher Scientific, catalogue no. AC457100250)		44.424		Crude apple fiber		8.847		Mineral Mix, AIN-93G-MX (22.1% sucrose)		35
												Mineral Mix, AIN-93G-MX (22.1% sucrose)		35		Crude wheat fiber		8.847		Vitamin Mix, AIN-93-VX (9.5% sucrose)		15
												Vitamin Mix, AIN-93-VX (9.5% sucrose)		15		Crude oat fiber		8.847		L-cystine		4
												L-cystine		4		Crude pea fiber		8.847		Choline bitartrate		2.75
												Choline bitartrate		2.75		Crude psyllium fiber		8.847		Butylhydroquinone		0.015
												Butylhydroquinone		0.015		Mineral Mix, AIN-93G-MX (22.1% sucrose)		35
																Vitamin Mix, AIN-93-VX (9.5% sucrose)		15
																L-cystine		4
																Choline bitartrate		2.75
																Butylhydroquinone		0.015
Mineral content (mg/kg)				Mineral content (mg/kg)				Mineral content (mg/kg)				Mineral content (mg/kg)				Mineral content (mg/kg)				Mineral content (mg/kg)
Calcium	8300			Calcium	7300			Calcium	8900			Calcium	5095.46			Calcium	5095.46			Calcium	5095.46
Potassium	6900			Potassium	6000			Potassium	9100			Potassium	5472.21			Potassium	5472.21			Potassium	5472.21
Sodium	2700			Sodium	2500			Sodium	3500			Sodium	1026.95			Sodium	1026.95			Sodium	1026.95
Magnesium	2200			Magnesium	1600			Magnesium	2500			Magnesium	512.882			Magnesium	512.882			Magnesium	512.882
Iron	130.65			Iron	270			Iron	290			Iron	48.3567			Iron	48.3567			Iron	48.3567
Zinc	86.59			Zinc	55			Zinc	160			Zinc	30.1119			Zinc	30.1119			Zinc	30.1119
Manganese	91.05			Manganese	70			Manganese	140			Manganese	10.5386			Manganese	10.5386			Manganese	10.5386
Copper	16.42			Copper	16			Copper	21			Copper	5.58031			Copper	5.58031			Copper	5.58031
Chlorine	4000			Chlorine	4000			Chlorine	5900			Chlorine	1572.9			Chlorine	1572.9			Chlorine	1572.9
Phosphorus	6400			Phosphorus	5500			Phosphorus	7000			Phosphorus	1561.37			Phosphorus	1561.37			Phosphorus	1561.37
Iodine	0.39043							Iodine	2.3			Iodine	0.207553			Iodine	0.207553			Iodine	0.207553
Selenium	0.26549							Selenium	0.3			Selenium	0.150659			Selenium	0.150659			Selenium	0.150659
Fluorine	9.63							Fluorine	15			Fluorine	1.00561			Fluorine	1.00561			Fluorine	1.00561
Cobalt	0.49492							Chromium	2			Chromium	1.00213			Chromium	1.00213			Chromium	1.00213
								Cobalt	1			Nickel	0.520967			Nickel	0.520967			Nickel	0.520967
								Sulfur	3100			Sulfur	301.353			Sulfur	301.353			Sulfur	301.353
												Silicon	5.01527			Silicon	5.01527			Silicon	5.01527
												Boron	0.498737			Boron	0.498737			Boron	0.498737
												Molybdenum	0.161591			Molybdenum	0.161591			Molybdenum	0.161591
												Vanadium	0.100596			Vanadium	0.100596			Vanadium	0.100596
												Lithium	0.0997091			Lithium	0.0997091			Lithium	0.0997091
Vitamin content (mg/kg)				Vitamin content (mg/kg)				Vitamin content (mg/kg)				Vitamin content (mg/kg)				Vitamin content (mg/kg)				Vitamin content (mg/kg)
Vitamin K3 (menadione)	185.05			Vitamin K3 (menadione)	2.5			Vitamin K3 (menadione)	3.3			Vitamin K1 (phylloquinone)	1.125			Vitamin K1 (phylloquinone)	1.125			Vitamin K1 (phylloquinone)	1.125
Vitamin B1 (thiamine)	15.84			Vitamin B1 (thiamine)	5			Vitamin B1 (thiamine)	85			Vitamin B1 (thiamine)	7.29			Vitamin B1 (thiamine)	7.29			Vitamin B1 (thiamine)	7.29
Vitamin B2 (riboflavin)	13.28			Vitamin B2 (riboflavin)	6.5			Vitamin B2 (riboflavin)	17			Vitamin B2 (riboflavin)	9			Vitamin B2 (riboflavin)	9			Vitamin B2 (riboflavin)	9
Vitamin B3 (nicotinate)	78.92			Vitamin B3 (nicotinate)	70			Vitamin B3 (nicotinate)	100			Vitamin B3 (nicotinate)	45			Vitamin B3 (nicotinate)	45			Vitamin B3 (nicotinate)	45
Vitamin B5 (pantothenate)	25.24			Vitamin B5 (pantothenate)	10			Vitamin B5 (pantothenate)	29			Vitamin B5 (pantothenate)	24			Vitamin B5 (pantothenate)	24			Vitamin B5 (pantothenate)	24
Vitamin B6 (pyridoxine)	17.65			Vitamin B6 (pyridoxine)	3			Vitamin B6 (pyridoxine)	17			Vitamin B6 (pyridoxine)	10.5			Vitamin B6 (pyridoxine)	10.5			Vitamin B6 (pyridoxine)	10.5
Vitamin B7 (biotin)	0.48874			Vitamin B7 (biotin)	0.08			Vitamin B7 (biotin)	0.3			Vitamin B7 (biotin)	0.3			Vitamin B7 (biotin)	0.3			Vitamin B7 (biotin)	0.3
Vitamin B9 (folate)	4.3			Vitamin B9 (folate)	0.35			Vitamin B9 (folate)	4.6			Vitamin B9 (folate)	3			Vitamin B9 (folate)	3			Vitamin B9 (folate)	3
Vitamin B12 (cobalamin)	0.0782			Vitamin B12 (cobalamin)	0.01			Vitamin B12 (cobalamin)	0.051			Vitamin B12 (cobalamin)	0.0375			Vitamin B12 (cobalamin)	0.0375			Vitamin B12 (cobalamin)	0.0375
Vitamin A	5.213			Vitamin A	2.25			Vitamin A	9			Vitamin A	1.8			Vitamin A	1.8			Vitamin A	1.8
Vitamin D3	0.0769355			Vitamin D3	0.025			Vitamin D3	0.0775			Vitamin D3	0.0375			Vitamin D3	0.0375			Vitamin D3	0.0375
Vitamin E	68.8827			Vitamin E	20.1			Vitamin E	53.6			Vitamin E	75.375			Vitamin E	75.375			Vitamin E	75.375
Choline	899.51			Choline	1600			Choline	1492.16			Choline	1130.25			Choline	1130.25			Choline	1130.25
Vitamin C (Ascorbic Acid)	1.8							Carotene	0.8
Inositol	2241.1

## Sheet: Table S2
Supplementary Table 2: CyTOF antibody panel
Antibody panel used to stain cells isolated from colonic lamina propria, lung, and spleen samples for CyTOF analysis.
Metal	Antibody	Clone	Isotype
89Y	CD45	30-F11	IgG2b
141-Pr	Ly-6G	1A8	IgG2a
144Nd	CD45R (B220)	RA3-6B2	Rat IgG2a
145Nd	CD69	H1.2F3	Hamster IgG
146Nd	F4/80	BM8	Rat IgG2a
148Nd	CD11b (Mac-1)	M1/70	Rat IgG2b
149Sm	CD19	6D5	Rat IgG2a
150Nd	CD25 (IL-2R	3C7	Rat IgG2b
151Eu	IgM	RMM-1	Rat IgG2a
152Sm	CD3e	145-2C11	Hamster IgG
153Eu	CD8a	53-6.7	Rat IgG2a
158Gd	Foxp3	FJK-16s	Rat IgG2a
159Tb	RORyt	B2D	IgG1
160Gd	CD5	53-7.3	Rat IgG2a
161Dy	Tbet	4B10	IgG1
162Dy	Ly-6C	HK1.4	Rat IgG2c
164Dy	CD62L	MEL-14	Rat IgG2a
166Er	CD326 (EpCAM)	G8.8	Rat IgG2a
167Er	Gata3	TWAJ	Rat IgG2b
169Tm	CD206 (MMR)	C068C2	Rat IgG2a
170Er	CD49b	HMa2	Hamster IgG
171Yb	CD44	IM7	Rat IgG2b
172Yb	CD4	RM4-5	Rat IgG2a
173Yb	CD117 (ckit)	2B8	Rat IgG2b
174Yb	I-A/I-E (MHC Class II	M5/114.15.2	Rat IgG2b
175Lu	CD38	90	Rat IgG2a
176Yb	FceR1a	36951	Hamster IgG
209Bi	CD11c	N418	Hamster IgG

## Sheet: Table S3
Supplementary Table 3: Microbiome composition by 16S rRNA gene sequencing.
Composition of fecal microbiota by 16S rRNA gene sequencing of specific-pathogen-free (SPF) mice before (day 0) and after 40 days of feeding (day 40) for all diets: fiber-rich 1 (FR1), fiber-rich 2 (FR2), inulin-supplemented (IN), fiber-supplemented (FS) or fiber-free (FF).
							Diet	FR1	FR1	FR1	FR1	FR1	FR2	FR2	FR2	FR2	FR2	FR2	FR2	FR2	IN	IN	IN	IN	IN	IN	IN	IN	FS	FS	FS	FS	FS	FS	FS	FS	FF	FF	FF	FF	FF	FR1	FR1	FR1	FR1	FR1	FR2	FR2	FR2
							Day	0	0	0	0	0	0	0	0	0	0	0	0	0	0	0	0	0	0	0	0	0	0	0	0	0	0	0	0	0	0	0	0	0	0	40	40	40	40	40	40	40	40
							Strain	Balb/c	Balb/c	Balb/c	Balb/c	Balb/c	Balb/c	Balb/c	Balb/c	Balb/c	Balb/c	Balb/c	Balb/c	Balb/c	Balb/c	Balb/c	Balb/c	Balb/c	Balb/c	Balb/c	Balb/c	Balb/c	Balb/c	Balb/c	Balb/c	Balb/c	Balb/c	Balb/c	Balb/c	Balb/c	Balb/c	Balb/c	Balb/c	Balb/c	Balb/c	Balb/c	Balb/c	Balb/c	Balb/c	Balb/c	Balb/c	Balb/c	Balb/c
							Mouse	104	105	106	109	110	LD1	LD2	LD3	LD4	LD5	LD6	LD7	LD8	Inulin1	Inulin2	Inulin3	Inulin4	Inulin5	Inulin6	Inulin7	Inulin8	FS1	FS2	FS3	FS4	FS5	FS6	FS7	FS8	134	135	136	139	140	104	105	106	109	110	LD1	LD2	LD3
							pielou_evenness	0.856886	0.934708	0.896822	0.881726	0.880038	0.958443	0.96556	0.950232	0.945092	0.963949	0.943897	0.958032	0.950891	0.954384	0.959392	0.952347	0.948974	0.940132	0.965387	0.937751	0.945024	0.943974	0.945583	0.942949	0.955109	0.943313	0.967436	0.92009	0.944941	0.88328	0.844567	0.898873	0.933473	0.871712	0.962285	0.924421	0.957596	0.920714	0.891237	0.9539	0.951652	0.958445
							faith_pd	17.3563	16.8996	15.3047	14.6023	16.1701	14.1475	16.4924	15.773	11.251	12.7704	11.3661	14.8585	13.7798	14.5606	14.3108	14.1895	14.998	14.3506	15.7736	12.6886	13.4737	13.1121	11.5256	12.6465	13.5253	11.7295	19.9843	13.7384	16.59	16.4023	15.8546	14.3038	13.8921	16.5321	18.3315	16.0585	18.6234	16.3978	14.323	19.3148	14.7973	15.2547
							shannon_entropy	7.25228	7.98524	7.19464	7.0637	7.2543	7.3262	7.68586	7.3172	6.55019	7.19051	6.66966	7.28806	7.2196	7.28827	7.5684	7.36613	7.41507	7.01285	7.53089	6.76978	7.01005	6.77765	6.48479	6.85221	6.88581	6.44555	7.83433	6.77768	7.44285	7.28523	6.78941	7.06332	7.63107	7.13052	8.36225	7.64199	8.4764	7.6454	6.96963	7.23529	7.26741	7.36036
							observed_features	353	373	260	258	303	200	249	208	122	176	134	195	193	199	237	213	225	176	223	149	171	145	116	154	148	114	274	165	235	304	263	232	289	290	413	308	462	316	226	192	199	205
Kingdom	Phylum	Class	Order	Family	Genus	ID
Unassigned	__	__	__	__	__	sp1		0	0	0	0	0	0	0	0	0	0	0	0	0	0	2	0	0	0	0	0	0	0	0	0	0	0	0	0	0	0	0	0	0	0	0	0	0	0	0	0	0	0
d__Bacteria	__	__	__	__	__	sp2		0	0	0	0	0	0	0	0	0	0	0	0	0	0	0	0	0	0	0	0	0	0	0	0	0	0	0	0	0	0	0	0	0	0	0	0	0	0	0	0	0	0
d__Bacteria	p__Actinobacteriota	c__Actinobacteria	o__Corynebacteriales	f__Corynebacteriaceae	g__Corynebacterium	sp3		0	0	0	2	0	0	0	0	0	0	0	0	0	0	0	0	0	0	0	0	0	0	0	0	0	0	0	0	0	0	0	0	0	0	0	0	0	0	0	0	0	0
d__Bacteria	p__Actinobacteriota	c__Actinobacteria	o__Micrococcales	f__Microbacteriaceae	g__Curtobacterium	sp4		0	0	2	0	0	0	0	0	0	0	0	0	0	0	0	0	0	0	0	0	0	0	0	0	0	0	0	0	0	0	0	0	0	0	0	0	0	0	0	0	0	0
d__Bacteria	p__Actinobacteriota	c__Actinobacteria	o__Micrococcales	f__Microbacteriaceae	g__Rathayibacter	sp5		0	5	0	0	0	0	0	0	0	0	0	0	0	0	0	0	0	0	0	0	0	0	0	0	0	0	0	0	0	0	0	0	0	0	0	0	0	0	0	0	0	0
d__Bacteria	p__Actinobacteriota	c__Coriobacteriia	o__Coriobacteriales	f__Atopobiaceae	g__Olsenella	sp6		0	0	0	0	0	0	10	0	0	0	0	0	0	0	0	0	0	0	0	0	0	24	91	0	0	0	0	0	71	0	0	0	0	0	0	0	0	2	0	5	0	0
d__Bacteria	p__Actinobacteriota	c__Coriobacteriia	o__Coriobacteriales	f__Coriobacteriales_Incertae_Sedis	g__uncultured	sp7		0	0	0	2	0	0	0	0	0	0	0	0	0	0	0	0	0	0	0	0	0	0	0	0	0	0	0	0	0	0	0	0	0	0	0	0	0	0	0	0	0	0
d__Bacteria	p__Actinobacteriota	c__Coriobacteriia	o__Coriobacteriales	f__Eggerthellaceae	__	sp8		0	0	0	0	0	0	0	0	0	0	0	0	0	0	0	0	0	0	0	0	0	0	0	0	0	0	0	0	0	15	0	0	0	0	23	38	17	0	0	0	0	0
d__Bacteria	p__Actinobacteriota	c__Coriobacteriia	o__Coriobacteriales	f__Eggerthellaceae	g__Enterorhabdus	sp9		441	33	104	91	12	0	19	0	0	0	0	18	22	0	14	0	29	0	12	0	0	153	50	16	0	0	61	0	34	98	61	46	35	128	27	112	91	101	76	38	39	17
d__Bacteria	p__Bacteroidota	c__Bacteroidia	o__Bacteroidales	f__Bacteroidaceae	g__Bacteroides	sp10		114	233	79	26	198	310	273	273	314	252	62	134	214	126	577	469	162	70	263	55	131	100	0	223	49	0	121	56	269	85	228	162	68	126	76	66	97	49	95	0	48	0
d__Bacteria	p__Bacteroidota	c__Bacteroidia	o__Bacteroidales	f__Bacteroidaceae	g__Bacteroides	sp11		358	299	342	285	357	492	889	694	958	639	299	354	1209	379	379	502	432	309	332	400	290	212	295	505	704	210	155	227	176	140	300	444	377	235	117	141	196	189	102	161	285	314
d__Bacteria	p__Bacteroidota	c__Bacteroidia	o__Bacteroidales	f__Barnesiellaceae	g__Barnesiella	sp12		0	0	0	0	0	0	0	0	0	0	0	0	0	0	0	0	0	0	0	0	0	0	0	0	0	0	0	2	0	0	0	0	0	0	0	0	0	0	0	0	0	0
d__Bacteria	p__Bacteroidota	c__Bacteroidia	o__Bacteroidales	f__Marinifilaceae	g__Odoribacter	sp13		0	0	0	0	0	0	0	0	0	0	0	0	0	0	0	0	0	0	0	0	0	0	0	0	0	0	0	0	0	0	0	0	0	0	0	0	0	0	0	0	0	0
d__Bacteria	p__Bacteroidota	c__Bacteroidia	o__Bacteroidales	f__Marinifilaceae	g__Odoribacter	sp14		181	154	136	0	137	0	0	0	0	0	0	0	0	75	139	114	92	64	104	64	63	78	61	85	79	71	78	69	85	0	175	192	185	170	105	88	262	85	75	49	75	68
d__Bacteria	p__Bacteroidota	c__Bacteroidia	o__Bacteroidales	f__Muribaculaceae	__	sp15		0	0	0	0	0	0	0	0	0	0	0	0	0	0	0	0	0	0	0	0	0	0	0	0	0	0	0	0	0	0	0	0	0	0	0	0	0	0	0	0	0	0
d__Bacteria	p__Bacteroidota	c__Bacteroidia	o__Bacteroidales	f__Muribaculaceae	g__Muribaculaceae	sp16		8333	7593	6163	7098	6090	423	1530	633	982	714	71	772	1299	3187	4434	4098	5093	4053	3303	3350	4231	3174	2553	3969	2406	2881	3254	3515	4317	3250	3515	3406	3259	4987	2092	4414	2354	3767	3781	1975	1678	1547
d__Bacteria	p__Bacteroidota	c__Bacteroidia	o__Bacteroidales	f__Muribaculaceae	g__Muribaculum	sp17		0	0	70	0	41	0	0	0	0	0	0	0	0	0	2	0	0	0	0	0	0	78	0	0	206	59	86	54	135	51	76	162	0	0	210	0	0	36	101	0	0	0
d__Bacteria	p__Bacteroidota	c__Bacteroidia	o__Bacteroidales	f__Muribaculaceae	g__Muribaculum	sp18		213	215	160	139	125	0	0	0	0	0	0	53	42	60	125	53	120	107	0	123	90	293	173	179	239	100	173	134	206	151	175	310	131	157	377	204	251	135	246	0	60	61
d__Bacteria	p__Bacteroidota	c__Bacteroidia	o__Bacteroidales	f__Prevotellaceae	g__Alloprevotella	sp19		161	185	212	121	1062	0	0	0	0	0	0	0	0	0	97	116	84	193	158	210	111	84	91	87	0	78	0	168	0	53	124	215	97	148	122	102	107	170	187	0	0	0
d__Bacteria	p__Bacteroidota	c__Bacteroidia	o__Bacteroidales	f__Prevotellaceae	g__Prevotellaceae_UCG-001	sp20		88	376	203	79	142	0	0	0	0	2	0	0	0	53	98	110	155	80	99	116	159	74	65	97	122	46	57	86	86	44	151	183	89	110	165	94	141	72	136	0	46	81
d__Bacteria	p__Bacteroidota	c__Bacteroidia	o__Bacteroidales	f__Rikenellaceae	g__Alistipes	sp21		242	196	156	85	155	127	131	119	205	97	56	72	131	55	160	271	348	327	244	193	275	62	99	170	220	103	68	65	146	110	132	165	149	27	167	176	112	0	42	61	38	0
d__Bacteria	p__Bacteroidota	c__Bacteroidia	o__Bacteroidales	f__Rikenellaceae	g__Alistipes	sp22		0	0	0	0	0	0	0	0	0	0	0	0	0	0	0	0	0	0	0	0	0	0	0	0	0	0	0	0	0	0	0	0	0	0	0	0	0	0	0	0	0	0
d__Bacteria	p__Bacteroidota	c__Bacteroidia	o__Bacteroidales	f__Rikenellaceae	g__Alistipes	sp23		484	309	365	291	721	580	473	451	640	547	163	334	476	411	833	640	731	715	763	520	748	403	384	845	270	358	990	492	563	181	434	408	386	461	689	448	593	287	128	510	548	742
d__Bacteria	p__Bacteroidota	c__Bacteroidia	o__Bacteroidales	f__Rikenellaceae	g__Rikenellaceae_RC9_gut_group	sp24		52	78	0	0	91	47	272	149	302	204	117	154	287	49	170	260	169	67	137	15	184	72	43	164	146	32	24	37	138	209	244	281	125	174	43	57	22	14	31	28	30	21
d__Bacteria	p__Bacteroidota	c__Bacteroidia	o__Bacteroidales	f__Tannerellaceae	g__Parabacteroides	sp25		31	43	11	0	0	28	43	26	0	31	0	20	64	0	0	0	10	16	15	33	0	22	27	71	126	19	43	30	92	31	26	218	0	25	44	42	45	0	0	0	5	22
d__Bacteria	p__Bacteroidota	c__Bacteroidia	o__Chitinophagales	f__Chitinophagaceae	g__Sediminibacterium	sp26		0	0	0	0	0	0	0	0	0	0	0	0	0	0	0	0	0	0	0	0	0	0	0	0	0	0	0	0	0	0	0	0	0	0	0	0	0	0	0	0	0	0
d__Bacteria	p__Bacteroidota	c__Bacteroidia	o__Flavobacteriales	f__Weeksellaceae	g__Cloacibacterium	sp27		0	0	0	0	0	0	0	0	0	0	0	0	0	0	0	0	0	0	0	0	0	0	0	0	0	0	0	0	0	0	0	0	0	0	0	0	0	0	0	0	0	0
d__Bacteria	p__Bdellovibrionota	c__Oligoflexia	o__0319-6G20	f__0319-6G20	g__0319-6G20	sp28		0	0	0	0	0	0	0	0	0	0	0	0	0	0	0	0	0	0	0	0	0	0	0	0	0	0	0	0	0	0	0	0	0	0	0	0	0	0	0	0	0	0
d__Bacteria	p__Cyanobacteria	c__Cyanobacteriia	o__Chloroplast	f__Chloroplast	g__Chloroplast	sp29		0	0	0	2	0	0	0	0	0	0	0	0	0	0	0	0	0	0	0	0	0	0	0	0	0	0	0	0	0	0	0	0	0	0	0	0	0	0	0	0	0	0
d__Bacteria	p__Cyanobacteria	c__Vampirivibrionia	o__Gastranaerophilales	f__Gastranaerophilales	g__Gastranaerophilales	sp30		140	255	67	55	221	0	0	0	61	0	7	17	0	35	489	126	579	124	338	14	376	57	73	228	147	16	65	26	141	29	37	23	18	79	86	92	51	65	56	20	65	60
d__Bacteria	p__Cyanobacteria	c__Vampirivibrionia	o__Obscuribacterales	f__Obscuribacteraceae	g__Candidatus_Obscuribacter	sp31		0	0	0	0	0	0	0	0	0	0	0	0	0	0	0	0	0	0	0	0	0	0	0	0	0	0	0	0	0	0	0	2	0	0	0	0	0	0	0	0	0	0
d__Bacteria	p__Deferribacterota	c__Deferribacteres	o__Deferribacterales	f__Deferribacteraceae	g__Mucispirillum	sp32		0	0	8	0	0	271	147	735	417	253	576	332	666	109	0	52	45	0	77	11	0	11	7	0	0	77	107	27	0	114	0	0	0	14	398	17	155	16	3	258	228	117
d__Bacteria	p__Desulfobacterota	c__Desulfovibrionia	o__Desulfovibrionales	f__Desulfovibrionaceae	g__Bilophila	sp33		0	0	0	0	0	0	0	0	0	0	0	0	0	0	0	0	0	0	0	0	0	0	0	0	0	0	0	0	0	0	0	0	0	0	0	0	0	0	3	0	0	0
d__Bacteria	p__Desulfobacterota	c__Desulfovibrionia	o__Desulfovibrionales	f__Desulfovibrionaceae	g__Bilophila	sp34		47	50	0	0	14	219	63	206	158	208	264	185	235	92	68	0	0	0	55	68	0	0	0	0	14	0	94	0	0	0	29	13	90	0	220	57	107	95	0	104	90	83
d__Bacteria	p__Desulfobacterota	c__Desulfovibrionia	o__Desulfovibrionales	f__Desulfovibrionaceae	g__Desulfovibrio	sp35		0	0	0	0	0	0	0	0	0	0	0	0	0	0	0	3	0	0	0	0	0	0	0	0	0	0	0	0	0	0	0	0	0	0	0	0	0	0	0	0	0	0
d__Bacteria	p__Desulfobacterota	c__Desulfovibrionia	o__Desulfovibrionales	f__Desulfovibrionaceae	g__uncultured	sp36		0	0	0	0	0	0	0	0	0	0	0	0	0	0	0	0	0	0	0	0	0	0	0	0	0	0	0	0	0	0	2	0	0	0	0	0	0	0	0	0	0	0
d__Bacteria	p__Firmicutes	c__Bacilli	o__Acholeplasmatales	f__Acholeplasmataceae	g__Anaeroplasma	sp37		0	0	19	8	106	0	0	0	0	0	0	0	0	0	222	0	0	42	95	0	0	21	0	88	145	0	137	0	41	0	108	0	0	78	0	0	0	26	0	35	76	39
d__Bacteria	p__Firmicutes	c__Bacilli	o__Bacillales	f__Bacillaceae	g__Bacillus	sp38		0	0	0	0	0	0	0	0	0	0	0	0	0	0	0	0	0	0	0	0	0	0	0	0	0	0	0	0	0	0	0	0	0	0	0	0	0	0	0	0	0	0
d__Bacteria	p__Firmicutes	c__Bacilli	o__Erysipelotrichales	f__Erysipelatoclostridiaceae	__	sp39		0	0	0	2	0	0	0	0	0	0	0	0	0	0	0	0	0	10	0	3	0	0	0	0	123	0	0	0	12	0	0	0	0	0	0	0	0	0	0	0	0	0
d__Bacteria	p__Firmicutes	c__Bacilli	o__Erysipelotrichales	f__Erysipelatoclostridiaceae	g__Catenibacterium	sp40		0	4	0	0	0	0	0	0	0	0	0	0	0	0	0	0	0	0	0	0	0	0	0	0	0	0	0	0	0	0	0	0	0	0	0	0	0	0	0	0	0	0
d__Bacteria	p__Firmicutes	c__Bacilli	o__Erysipelotrichales	f__Erysipelatoclostridiaceae	g__Erysipelatoclostridium	sp41		0	0	0	0	0	0	0	0	0	0	0	0	0	0	0	0	0	0	0	0	0	0	0	0	41	7	0	0	6	0	0	0	0	0	0	0	0	0	0	0	0	0
d__Bacteria	p__Firmicutes	c__Bacilli	o__Erysipelotrichales	f__Erysipelotrichaceae	__	sp42		12	17	0	4	9	0	0	0	0	0	0	0	0	0	0	3	19	0	0	0	0	14	0	20	0	3	0	0	133	9	32	24	8	5	8	6	0	0	0	32	8	22
d__Bacteria	p__Firmicutes	c__Bacilli	o__Erysipelotrichales	f__Erysipelotrichaceae	g__Erysipelothrix	sp43		0	23	0	0	0	0	0	0	0	0	0	0	0	0	0	0	0	0	0	0	0	13	0	0	0	0	0	0	0	0	0	0	0	0	0	0	0	0	0	0	13	0
d__Bacteria	p__Firmicutes	c__Bacilli	o__Erysipelotrichales	f__Erysipelotrichaceae	g__Faecalibaculum	sp44		3	0	0	0	0	0	0	0	0	0	22	1122	442	0	0	0	0	0	0	0	0	0	0	0	0	958	375	325	1338	0	0	0	0	0	164	646	59	142	297	0	0	33
d__Bacteria	p__Firmicutes	c__Bacilli	o__Erysipelotrichales	f__Erysipelotrichaceae	g__Turicibacter	sp45		0	0	6	27	115	61	128	0	0	0	0	0	0	0	0	0	0	0	0	0	0	0	0	0	0	0	0	0	0	0	0	2	0	0	224	1420	423	290	39	431	219	696
d__Bacteria	p__Firmicutes	c__Bacilli	o__Erysipelotrichales	f__Erysipelotrichaceae	g__uncultured	sp46		0	0	0	0	0	0	0	0	0	0	0	0	0	0	0	0	0	0	0	0	0	0	0	0	0	0	0	0	0	4	0	0	0	0	0	0	0	0	0	0	0	0
d__Bacteria	p__Firmicutes	c__Bacilli	o__Erysipelotrichales	f__Erysipelotrichaceae	g__uncultured	sp47		2	0	12	3	0	0	0	0	0	0	0	0	0	8	0	0	62	52	66	0	41	68	35	8	0	0	0	50	0	3	67	0	0	8	22	0	15	24	28	0	42	10
d__Bacteria	p__Firmicutes	c__Bacilli	o__Lactobacillales	f__Enterococcaceae	g__Enterococcus	sp48		0	0	0	0	0	0	0	0	0	0	0	0	0	0	0	0	0	0	0	0	0	0	0	0	0	0	0	0	0	0	11	30	0	0	0	0	0	0	0	0	0	0
d__Bacteria	p__Firmicutes	c__Bacilli	o__Lactobacillales	f__Lactobacillaceae	g__Lactobacillus	sp49		0	0	0	0	0	0	0	0	0	0	0	0	0	0	5	0	0	0	0	0	0	0	0	0	0	0	0	0	0	0	0	0	0	0	0	0	0	0	0	0	0	0
d__Bacteria	p__Firmicutes	c__Bacilli	o__Lactobacillales	f__Lactobacillaceae	g__Lactobacillus	sp50		10400	1830	5150	6277	6446	0	955	228	291	229	301	562	364	539	1049	810	1728	1049	601	1054	1083	1402	708	1218	896	1172	862	2423	1066	6069	9022	4326	3439	6478	588	2668	636	2754	4467	928	468	891
d__Bacteria	p__Firmicutes	c__Bacilli	o__Lactobacillales	f__Leuconostocaceae	g__Leuconostoc	sp51		0	0	0	0	0	0	0	0	0	0	0	0	0	0	0	0	0	0	0	0	0	0	0	0	0	0	0	0	0	0	0	0	0	0	2	0	0	0	8	0	0	0
d__Bacteria	p__Firmicutes	c__Bacilli	o__Lactobacillales	f__Listeriaceae	g__Listeria	sp52		0	0	0	0	0	0	0	0	0	0	0	0	0	0	0	0	0	0	0	0	0	0	0	0	0	0	0	0	0	0	0	0	0	0	0	0	0	0	0	0	0	0
d__Bacteria	p__Firmicutes	c__Bacilli	o__Lactobacillales	f__Streptococcaceae	g__Lactococcus	sp53		0	0	0	0	0	0	0	0	0	0	0	0	0	0	0	0	0	0	0	0	0	0	0	0	0	0	0	0	0	0	0	0	0	0	0	0	0	0	0	0	0	0
d__Bacteria	p__Firmicutes	c__Bacilli	o__Lactobacillales	f__Streptococcaceae	g__Lactococcus	sp54		0	0	0	0	0	0	0	0	0	0	0	0	0	0	0	0	0	0	0	0	0	0	0	0	0	0	0	0	0	0	0	0	0	0	0	0	0	0	0	0	0	0
d__Bacteria	p__Firmicutes	c__Bacilli	o__Lactobacillales	f__Streptococcaceae	g__Lactococcus	sp55		0	0	0	0	0	0	0	0	0	0	0	0	0	0	0	0	0	0	0	0	0	0	0	0	0	0	0	0	0	0	0	0	0	0	0	0	0	0	0	0	0	0
d__Bacteria	p__Firmicutes	c__Bacilli	o__Lactobacillales	f__Streptococcaceae	g__Streptococcus	sp56		0	0	0	0	0	0	0	0	0	0	0	0	0	0	0	0	0	0	0	0	0	0	0	0	0	0	0	0	0	0	0	0	0	0	0	0	0	0	0	0	0	0
d__Bacteria	p__Firmicutes	c__Bacilli	o__Lactobacillales	f__Streptococcaceae	g__Streptococcus	sp57		0	0	0	0	0	0	0	0	0	0	0	0	0	0	0	0	0	0	0	0	0	0	0	0	0	0	0	0	0	0	0	0	0	0	0	0	0	0	0	0	0	0
d__Bacteria	p__Firmicutes	c__Bacilli	o__Lactobacillales	f__Streptococcaceae	g__Streptococcus	sp58		20	16	4	20	0	0	0	0	0	2	0	0	0	0	6	17	0	0	4	0	0	0	0	0	11	12	0	0	5	22	12	0	7	13	0	0	8	0	4	0	0	0
d__Bacteria	p__Firmicutes	c__Bacilli	o__RF39	f__RF39	g__RF39	sp59		34	16	10	28	0	0	0	0	0	0	0	0	30	0	6	0	54	0	13	0	0	0	0	3	0	0	0	0	0	23	0	0	0	14	40	0	0	0	3	3	9	0
d__Bacteria	p__Firmicutes	c__Bacilli	o__RF39	f__RF39	g__RF39	sp60		389	284	32	191	182	0	0	0	0	6	0	0	0	240	0	94	436	197	15	11	198	12	12	31	109	42	116	110	51	176	77	70	71	79	180	160	384	177	74	84	492	229
d__Bacteria	p__Firmicutes	c__Bacilli	o__RF39	f__RF39	g__RF39	sp61		0	0	0	0	0	0	0	0	0	0	0	0	0	0	0	0	0	0	0	0	0	0	0	0	0	0	0	0	0	0	0	0	0	0	0	0	10	0	0	0	0	0
d__Bacteria	p__Firmicutes	c__Bacilli	o__Staphylococcales	f__Staphylococcaceae	g__Staphylococcus	sp62		0	3	43	0	0	0	0	0	0	0	0	0	0	0	0	0	0	0	0	0	0	0	0	0	9	0	0	3	0	0	0	0	0	0	0	0	0	2	0	0	0	0
d__Bacteria	p__Firmicutes	c__Bacilli	o__Staphylococcales	f__Staphylococcaceae	g__Staphylococcus	sp63		78	0	0	0	3	0	0	0	0	0	0	0	0	0	0	0	0	0	0	0	0	23	0	0	0	0	0	0	0	0	0	0	0	0	0	0	0	0	0	0	0	0
d__Bacteria	p__Firmicutes	c__Clostridia	o__Christensenellales	f__Christensenellaceae	__	sp64		0	0	0	0	5	0	0	0	0	0	0	0	0	0	0	0	0	0	0	0	0	0	0	0	0	0	0	0	0	0	10	0	0	0	0	0	0	0	0	0	0	0
d__Bacteria	p__Firmicutes	c__Clostridia	o__Christensenellales	f__Christensenellaceae	g__Christensenellaceae_R-7_group	sp65		29	33	14	22	20	0	0	0	0	0	0	0	0	0	0	0	35	7	11	5	0	0	0	0	15	0	13	0	15	28	0	35	0	16	19	0	0	4	12	0	0	7
d__Bacteria	p__Firmicutes	c__Clostridia	o__Christensenellales	f__Christensenellaceae	g__uncultured	sp66		0	0	0	0	0	0	0	0	0	0	6	5	8	0	0	0	0	0	0	0	0	0	0	0	0	0	0	0	0	4	0	0	0	0	0	0	0	0	0	0	0	0
d__Bacteria	p__Firmicutes	c__Clostridia	o__Christensenellales	f__Christensenellaceae	g__uncultured	sp67		0	13	0	0	0	0	0	0	0	0	0	0	34	0	0	0	0	0	5	0	0	0	0	0	0	0	0	0	0	2	0	7	0	0	11	4	0	0	2	0	0	0
d__Bacteria	p__Firmicutes	c__Clostridia	o__Clostridia	f__Hungateiclostridiaceae	g__Ruminiclostridium	sp68		0	0	0	0	0	0	0	0	0	0	0	0	0	0	0	0	0	0	0	0	0	0	0	0	0	0	0	0	0	0	0	0	0	2	0	0	0	0	0	0	0	5
d__Bacteria	p__Firmicutes	c__Clostridia	o__Clostridia_UCG-014	f__Clostridia_UCG-014	g__Clostridia_UCG-014	sp69		0	65	0	34	0	0	0	0	0	0	0	0	0	0	0	0	0	0	0	0	0	0	0	0	0	0	0	0	0	64	0	8	0	28	0	37	78	13	0	0	0	0
d__Bacteria	p__Firmicutes	c__Clostridia	o__Clostridia_UCG-014	f__Clostridia_UCG-014	g__Clostridia_UCG-014	sp70		963	1545	316	692	429	18	39	12	13	0	0	0	0	365	20	232	1331	394	430	0	320	119	32	357	247	67	305	261	207	977	485	454	329	362	540	646	1129	470	613	175	731	549
d__Bacteria	p__Firmicutes	c__Clostridia	o__Clostridia_UCG-014	f__Clostridia_UCG-014	g__Clostridia_UCG-014	sp71		0	0	0	0	0	0	0	0	0	0	0	0	0	0	0	0	0	0	0	0	0	0	0	0	0	0	0	0	0	0	0	0	0	0	0	0	0	0	0	0	0	0
d__Bacteria	p__Firmicutes	c__Clostridia	o__Clostridia_vadinBB60_group	f__Clostridia_vadinBB60_group	g__Clostridia_vadinBB60_group	sp72		5	0	0	0	0	0	0	0	0	0	0	0	0	0	0	0	0	0	0	0	0	0	0	0	0	0	0	28	0	0	12	26	6	9	27	0	6	0	0	0	0	0
d__Bacteria	p__Firmicutes	c__Clostridia	o__Clostridia_vadinBB60_group	f__Clostridia_vadinBB60_group	g__Clostridia_vadinBB60_group	sp73		58	14	30	9	155	0	3	0	0	9	15	11	31	101	273	101	38	90	207	58	74	42	32	128	33	14	53	105	39	32	64	22	133	191	37	6	118	50	4	23	176	13
d__Bacteria	p__Firmicutes	c__Clostridia	o__Clostridiales	f__Clostridiaceae	g__Candidatus_Arthromitus	sp74		220	34	68	77	151	0	0	0	0	0	0	2	0	39	123	87	123	145	137	158	199	71	60	85	77	98	34	76	81	0	147	0	0	103	0	0	0	0	0	0	4	16
d__Bacteria	p__Firmicutes	c__Clostridia	o__Clostridiales	f__Clostridiaceae	g__Clostridium_sensu_stricto_1	sp75		0	0	0	0	0	137	282	0	167	109	0	0	0	0	0	0	0	0	0	0	0	0	0	0	0	0	0	0	0	0	0	0	0	0	218	215	156	3	0	0	0	0
d__Bacteria	p__Firmicutes	c__Clostridia	o__Eubacteriales	f__Anaerofustaceae	g__Anaerofustis	sp76		7	0	0	0	0	0	0	0	0	0	0	0	0	0	0	0	0	0	0	0	0	0	0	0	0	0	0	0	0	0	0	0	0	4	0	0	0	0	3	0	0	0
d__Bacteria	p__Firmicutes	c__Clostridia	o__Lachnospirales	f__Defluviitaleaceae	g__Defluviitaleaceae_UCG-011	sp77		0	0	0	0	0	0	0	0	0	0	0	0	0	0	0	0	0	0	0	0	0	0	0	0	0	0	0	0	0	0	0	0	0	0	0	0	0	0	0	0	0	0
d__Bacteria	p__Firmicutes	c__Clostridia	o__Lachnospirales	f__Defluviitaleaceae	g__Defluviitaleaceae_UCG-011	sp78		0	34	0	0	0	0	0	0	0	0	0	0	0	0	0	0	20	0	0	0	0	0	0	0	0	0	0	0	0	0	0	16	0	0	8	8	0	0	0	0	0	0
d__Bacteria	p__Firmicutes	c__Clostridia	o__Lachnospirales	f__Lachnospiraceae	__	sp79		323	326	2	76	64	193	197	60	63	249	328	346	283	220	108	93	28	4	79	56	0	0	23	2	0	0	207	43	141	104	61	80	233	177	302	112	268	292	91	0	49	56
d__Bacteria	p__Firmicutes	c__Clostridia	o__Lachnospirales	f__Lachnospiraceae	g__A2	sp80		0	23	101	0	19	160	28	46	0	116	167	232	116	73	62	87	0	15	6	9	0	0	161	0	0	51	121	21	34	42	0	9	177	97	78	125	384	46	35	87	79	33
d__Bacteria	p__Firmicutes	c__Clostridia	o__Lachnospirales	f__Lachnospiraceae	g__ASF356	sp81		50	53	53	0	55	162	60	156	122	139	174	220	131	184	45	64	52	0	60	52	0	0	37	0	64	0	33	82	119	47	80	0	59	31	76	25	335	91	23	0	172	0
d__Bacteria	p__Firmicutes	c__Clostridia	o__Lachnospirales	f__Lachnospiraceae	g__Acetatifactor	sp82		0	0	0	0	0	0	0	0	0	0	0	0	0	0	0	0	0	0	0	0	0	0	0	0	0	0	0	0	0	0	0	0	0	0	0	0	0	17	0	0	0	0
d__Bacteria	p__Firmicutes	c__Clostridia	o__Lachnospirales	f__Lachnospiraceae	g__Acetatifactor	sp83		0	0	0	0	0	0	0	0	0	0	0	0	0	0	0	0	0	0	0	0	0	0	0	0	0	0	0	0	0	0	0	0	0	0	0	0	0	0	0	0	0	0
d__Bacteria	p__Firmicutes	c__Clostridia	o__Lachnospirales	f__Lachnospiraceae	g__Acetitomaculum	sp84		0	0	0	0	0	0	0	0	0	0	39	0	0	0	0	0	0	0	0	0	0	0	0	0	0	0	0	0	0	0	0	0	0	0	0	0	0	0	0	0	0	0
d__Bacteria	p__Firmicutes	c__Clostridia	o__Lachnospirales	f__Lachnospiraceae	g__Agathobacter	sp85		0	0	0	0	0	0	0	0	0	0	0	0	0	0	0	0	0	0	0	0	0	0	0	0	0	0	22	0	0	0	4	0	0	0	0	0	0	0	0	0	0	0
d__Bacteria	p__Firmicutes	c__Clostridia	o__Lachnospirales	f__Lachnospiraceae	g__Anaerostipes	sp86		0	0	0	0	0	0	0	0	0	0	0	0	0	0	0	0	0	0	0	0	0	0	0	0	0	0	0	0	0	0	0	0	0	0	0	0	0	0	0	0	0	0
d__Bacteria	p__Firmicutes	c__Clostridia	o__Lachnospirales	f__Lachnospiraceae	g__Blautia	sp87		74	21	235	43	51	514	271	412	351	393	413	397	489	127	87	91	106	19	136	42	0	4	137	0	56	11	315	39	97	362	251	52	216	439	264	210	424	468	62	366	405	275
d__Bacteria	p__Firmicutes	c__Clostridia	o__Lachnospirales	f__Lachnospiraceae	g__Coprococcus	sp88		0	0	0	0	0	13	0	0	0	0	0	16	0	0	0	0	0	0	0	0	0	0	0	0	0	0	0	0	0	0	0	0	0	0	20	0	0	0	0	10	0	0
d__Bacteria	p__Firmicutes	c__Clostridia	o__Lachnospirales	f__Lachnospiraceae	g__Dorea	sp89		0	0	0	0	0	0	0	0	0	0	0	0	0	0	0	0	0	0	0	0	0	0	0	0	0	0	0	0	0	0	0	0	0	0	0	0	0	0	0	0	0	0
d__Bacteria	p__Firmicutes	c__Clostridia	o__Lachnospirales	f__Lachnospiraceae	g__GCA-900066575	sp90		141	73	63	0	88	91	80	222	212	171	391	244	409	0	161	17	124	0	0	38	0	0	0	0	108	12	87	0	141	94	105	51	169	0	217	213	266	138	19	132	213	71
d__Bacteria	p__Firmicutes	c__Clostridia	o__Lachnospirales	f__Lachnospiraceae	g__Lachnoclostridium	sp91		0	0	4	0	0	0	0	0	0	0	0	0	11	0	0	0	0	0	0	0	0	0	0	0	0	0	0	0	0	0	0	0	0	0	0	0	0	0	0	0	0	0
d__Bacteria	p__Firmicutes	c__Clostridia	o__Lachnospirales	f__Lachnospiraceae	g__Lachnoclostridium	sp92		354	208	165	122	121	228	142	101	29	67	298	245	296	102	293	55	39	50	65	32	43	0	0	0	104	45	166	35	57	151	86	50	235	88	477	224	209	88	109	118	107	86
d__Bacteria	p__Firmicutes	c__Clostridia	o__Lachnospirales	f__Lachnospiraceae	g__Lachnospiraceae_FCS020_group	sp93		19	29	0	0	32	22	11	20	0	0	0	52	43	0	0	0	0	11	0	7	0	0	0	0	0	0	0	0	0	0	0	0	0	0	17	7	13	0	0	0	0	0
d__Bacteria	p__Firmicutes	c__Clostridia	o__Lachnospirales	f__Lachnospiraceae	g__Lachnospiraceae_NK4A136_group	sp94		0	0	0	0	0	0	0	0	0	0	2	0	0	0	0	0	0	0	0	0	0	0	0	0	0	0	0	0	0	0	0	0	0	0	0	0	0	0	0	0	0	7
d__Bacteria	p__Firmicutes	c__Clostridia	o__Lachnospirales	f__Lachnospiraceae	g__Lachnospiraceae_NK4A136_group	sp95		1402	1548	957	1304	650	2088	1165	1802	1997	1537	2311	1640	1521	1506	1415	601	546	577	1080	1376	441	959	689	395	669	204	2910	1266	1478	1159	705	637	1124	1089	2443	1234	2645	2794	519	1020	1792	1582
d__Bacteria	p__Firmicutes	c__Clostridia	o__Lachnospirales	f__Lachnospiraceae	g__Lachnospiraceae_NK4B4_group	sp96		0	0	0	59	0	0	0	0	0	0	0	0	0	0	0	0	0	0	0	0	0	0	0	0	0	0	0	0	0	140	0	119	0	64	225	38	190	0	125	0	0	0
d__Bacteria	p__Firmicutes	c__Clostridia	o__Lachnospirales	f__Lachnospiraceae	g__Lachnospiraceae_UCG-001	sp97		22	337	163	125	8	573	368	485	607	544	574	498	218	369	475	325	244	93	88	0	233	256	346	0	0	219	0	0	0	0	0	0	267	71	323	83	331	68	223	214	505	0
d__Bacteria	p__Firmicutes	c__Clostridia	o__Lachnospirales	f__Lachnospiraceae	g__Lachnospiraceae_UCG-006	sp98		332	89	214	102	60	46	0	14	0	0	24	27	79	0	24	0	76	0	12	0	0	29	0	0	0	0	112	0	3	386	92	161	265	160	631	337	599	279	55	126	191	41
d__Bacteria	p__Firmicutes	c__Clostridia	o__Lachnospirales	f__Lachnospiraceae	g__Lachnospiraceae_UCG-010	sp99		0	0	3	0	0	0	0	0	0	0	0	0	0	0	8	0	0	0	8	0	0	0	0	0	0	0	0	0	0	3	0	0	3	3	0	0	3	0	0	4	0	0
d__Bacteria	p__Firmicutes	c__Clostridia	o__Lachnospirales	f__Lachnospiraceae	g__Marvinbryantia	sp100		13	34	73	84	16	0	0	0	0	0	0	0	0	0	0	0	69	0	13	53	21	63	86	56	79	0	20	46	31	115	109	41	20	169	0	10	20	0	7	27	0	35
d__Bacteria	p__Firmicutes	c__Clostridia	o__Lachnospirales	f__Lachnospiraceae	g__Roseburia	sp101		0	0	0	0	0	0	0	0	0	0	0	0	0	0	0	0	0	0	0	0	2	0	0	0	0	0	0	0	0	5	0	0	0	0	0	0	0	0	0	0	0	0
d__Bacteria	p__Firmicutes	c__Clostridia	o__Lachnospirales	f__Lachnospiraceae	g__Roseburia	sp102		125	143	138	60	98	607	301	568	244	430	723	810	619	230	199	171	23	64	448	0	94	90	85	66	421	51	206	52	133	118	130	65	275	180	534	294	715	425	56	499	860	769
d__Bacteria	p__Firmicutes	c__Clostridia	o__Lachnospirales	f__Lachnospiraceae	g__Syntrophococcus	sp103		3	0	2	0	4	0	0	0	0	0	0	0	0	0	0	0	0	0	0	0	0	0	0	0	0	0	0	0	0	0	0	0	7	0	0	0	3	0	0	0	0	0
d__Bacteria	p__Firmicutes	c__Clostridia	o__Lachnospirales	f__Lachnospiraceae	g__Tuzzerella	sp104		0	0	0	0	0	83	0	115	126	139	169	163	208	24	0	0	0	0	0	0	0	0	0	2	0	0	0	0	0	16	0	0	28	10	78	24	48	0	0	10	0	13
d__Bacteria	p__Firmicutes	c__Clostridia	o__Lachnospirales	f__Lachnospiraceae	g__Tyzzerella	sp105		37	21	0	17	16	52	29	31	43	6	130	46	33	33	0	22	6	0	51	0	0	4	12	2	25	9	35	15	27	3	16	0	0	0	0	7	20	15	3	0	17	25
d__Bacteria	p__Firmicutes	c__Clostridia	o__Lachnospirales	f__Lachnospiraceae	g__[Eubacterium]_xylanophilum_group	sp106		12	38	0	39	28	23	109	202	152	168	253	218	312	54	0	0	17	46	66	0	0	28	0	63	0	0	79	13	69	152	25	30	134	112	26	128	42	136	0	106	39	67
d__Bacteria	p__Firmicutes	c__Clostridia	o__Lachnospirales	f__Lachnospiraceae	g__uncultured	sp107		38	0	0	0	8	239	127	262	326	172	253	191	144	48	88	0	0	0	0	0	2	0	90	0	42	0	185	0	0	44	20	0	41	0	119	58	55	44	0	105	155	24
d__Bacteria	p__Firmicutes	c__Clostridia	o__Lachnospirales	f__Lachnospiraceae	g__uncultured	sp108		1767	1887	1511	901	1046	2268	1055	2657	1506	1590	3989	2920	3493	2047	1758	2065	649	456	1391	973	608	635	356	187	384	292	3004	591	953	1234	995	431	2064	1120	3137	1254	3531	1802	732	1841	2103	1028
d__Bacteria	p__Firmicutes	c__Clostridia	o__Monoglobales	f__Monoglobaceae	g__Monoglobus	sp109		5	0	0	0	5	0	0	0	0	0	0	0	0	0	7	0	0	0	0	0	0	0	0	0	0	0	0	0	0	0	0	0	0	5	7	4	0	0	0	0	0	0
d__Bacteria	p__Firmicutes	c__Clostridia	o__Monoglobales	f__Monoglobaceae	g__Monoglobus	sp110		0	0	4	0	2	0	6	0	0	5	0	0	0	6	12	0	0	11	0	0	11	18	0	17	0	0	0	11	70	52	48	41	28	30	5	0	19	4	0	0	0	0
d__Bacteria	p__Firmicutes	c__Clostridia	o__Oscillospirales	__	__	sp111		0	0	0	0	0	0	0	0	0	0	0	0	0	0	0	0	0	0	0	0	0	0	5	0	0	0	0	0	0	0	0	3	0	0	0	0	2	0	0	2	0	0
d__Bacteria	p__Firmicutes	c__Clostridia	o__Oscillospirales	f__Butyricicoccaceae	g__Butyricicoccus	sp112		0	0	0	35	46	0	0	0	0	0	0	27	0	97	0	72	0	0	97	72	26	0	0	15	9	0	0	42	0	16	50	26	0	11	0	0	117	37	94	0	165	133
d__Bacteria	p__Firmicutes	c__Clostridia	o__Oscillospirales	f__Butyricicoccaceae	g__UCG-009	sp113		0	0	4	0	4	47	0	44	42	39	87	65	61	10	15	0	6	0	28	0	13	0	0	0	0	0	0	0	11	10	0	0	13	0	0	0	17	0	0	0	16	0
d__Bacteria	p__Firmicutes	c__Clostridia	o__Oscillospirales	f__Oscillospiraceae	__	sp114		0	177	124	79	59	224	74	220	226	30	301	181	267	135	245	0	58	0	112	109	55	61	63	0	95	0	139	0	81	38	42	26	137	50	189	161	261	42	0	101	165	97
d__Bacteria	p__Firmicutes	c__Clostridia	o__Oscillospirales	f__Oscillospiraceae	g__Colidextribacter	sp115		90	160	66	0	85	411	249	341	236	332	411	324	454	157	231	168	60	43	332	76	75	42	0	0	116	13	301	78	120	146	107	77	110	105	203	121	509	172	87	184	192	69
d__Bacteria	p__Firmicutes	c__Clostridia	o__Oscillospirales	f__Oscillospiraceae	g__Flavonifractor	sp116		0	7	0	0	0	0	0	0	0	0	0	0	0	0	0	0	0	0	0	0	0	0	0	0	0	0	0	0	0	0	0	0	0	0	0	0	15	0	0	0	0	0
d__Bacteria	p__Firmicutes	c__Clostridia	o__Oscillospirales	f__Oscillospiraceae	g__NK4A214_group	sp117		21	41	54	9	28	0	28	0	29	0	0	0	15	17	0	32	37	23	61	7	0	35	0	0	46	11	55	17	0	7	39	17	33	54	19	38	22	0	12	13	58	31
d__Bacteria	p__Firmicutes	c__Clostridia	o__Oscillospirales	f__Oscillospiraceae	g__Oscillibacter	sp118		171	82	115	0	85	51	0	89	70	139	121	28	104	245	326	142	32	37	273	55	45	0	11	20	123	19	347	52	130	178	16	35	130	74	233	108	349	92	0	0	226	44
d__Bacteria	p__Firmicutes	c__Clostridia	o__Oscillospirales	f__Oscillospiraceae	g__UCG-003	sp119		0	57	0	14	0	59	0	67	0	68	58	66	61	0	0	0	0	57	0	41	0	0	0	0	0	0	98	0	0	0	0	0	19	0	79	23	55	0	0	21	54	0
d__Bacteria	p__Firmicutes	c__Clostridia	o__Oscillospirales	f__Oscillospiraceae	g__UCG-005	sp120		0	0	0	0	0	0	0	0	0	0	0	0	0	0	0	0	0	0	0	0	0	0	0	0	22	0	0	0	0	0	0	0	0	0	0	3	0	0	0	0	0	0
d__Bacteria	p__Firmicutes	c__Clostridia	o__Oscillospirales	f__Oscillospiraceae	g__UCG-005	sp121		30	55	3	9	16	0	0	0	0	0	0	0	0	0	0	0	0	0	56	6	0	0	0	0	0	0	0	0	43	12	0	9	6	3	0	0	15	6	13	0	0	0
d__Bacteria	p__Firmicutes	c__Clostridia	o__Oscillospirales	f__Oscillospiraceae	g__uncultured	sp122		0	0	0	0	0	0	0	0	0	0	0	0	0	0	0	0	0	0	0	0	0	0	0	0	0	0	0	0	0	0	0	0	0	0	0	0	0	0	0	0	0	0
d__Bacteria	p__Firmicutes	c__Clostridia	o__Oscillospirales	f__Oscillospiraceae	g__uncultured	sp123		187	400	156	67	315	781	394	1054	744	808	1597	1111	1541	928	869	763	307	327	847	375	358	0	3	24	152	0	768	25	464	338	224	83	562	182	925	404	1047	377	139	772	1292	733
d__Bacteria	p__Firmicutes	c__Clostridia	o__Oscillospirales	f__Oscillospirales	g__Hydrogenoanaerobacterium	sp124		0	0	0	0	0	0	0	0	0	0	0	0	0	0	0	0	0	0	0	0	0	0	0	0	0	0	0	0	0	0	0	0	3	0	3	0	0	0	0	0	0	0
d__Bacteria	p__Firmicutes	c__Clostridia	o__Oscillospirales	f__Ruminococcaceae	__	sp125		0	0	0	5	4	0	0	0	0	0	0	0	0	0	0	0	0	0	0	0	0	0	0	0	0	0	0	0	0	0	6	0	0	0	8	0	5	0	0	0	0	0
d__Bacteria	p__Firmicutes	c__Clostridia	o__Oscillospirales	f__Ruminococcaceae	g__Anaerotruncus	sp126		0	0	0	0	0	0	0	0	0	0	0	0	0	0	0	0	0	0	0	0	0	0	0	0	0	0	0	0	0	0	0	0	0	0	0	0	0	0	0	0	0	0
d__Bacteria	p__Firmicutes	c__Clostridia	o__Oscillospirales	f__Ruminococcaceae	g__Anaerotruncus	sp127		12	108	33	28	15	108	52	149	0	89	187	91	102	258	0	33	0	17	178	49	27	9	0	23	47	0	85	12	52	49	12	35	49	21	135	0	84	63	4	0	125	120
d__Bacteria	p__Firmicutes	c__Clostridia	o__Oscillospirales	f__Ruminococcaceae	g__Faecalibacterium	sp128		0	0	0	0	0	3	0	0	0	0	0	0	0	0	0	0	0	0	0	0	0	0	0	0	0	0	0	0	0	0	0	0	0	0	0	0	0	0	0	0	0	0
d__Bacteria	p__Firmicutes	c__Clostridia	o__Oscillospirales	f__Ruminococcaceae	g__Incertae_Sedis	sp129		8	80	18	3	37	80	9	70	21	25	180	70	172	79	74	43	38	48	114	119	8	16	0	8	211	0	92	0	131	86	30	14	28	26	238	47	128	64	9	174	74	232
d__Bacteria	p__Firmicutes	c__Clostridia	o__Oscillospirales	f__Ruminococcaceae	g__Paludicola	sp130		0	0	7	0	0	0	0	0	0	0	0	0	0	0	0	0	0	0	0	0	0	0	0	0	0	0	0	0	0	0	0	0	0	0	0	0	0	0	0	0	0	0
d__Bacteria	p__Firmicutes	c__Clostridia	o__Oscillospirales	f__Ruminococcaceae	g__Ruminococcaceae	sp131		0	12	27	0	20	0	0	0	0	0	0	0	0	57	115	0	0	0	54	27	41	0	0	3	0	0	29	0	0	0	0	0	0	0	0	0	0	0	0	0	0	0
d__Bacteria	p__Firmicutes	c__Clostridia	o__Oscillospirales	f__Ruminococcaceae	g__Ruminococcus	sp132		19	56	205	11	0	0	0	37	47	37	0	7	9	36	65	185	373	52	135	0	67	262	481	35	423	251	293	23	175	3	3	51	0	0	111	41	156	18	0	0	6	55
d__Bacteria	p__Firmicutes	c__Clostridia	o__Oscillospirales	f__Ruminococcaceae	g__UBA1819	sp133		0	0	0	7	0	0	0	0	0	0	29	0	25	0	0	0	0	28	0	0	0	0	0	0	0	0	0	0	22	0	4	19	0	0	150	0	79	30	0	28	22	20
d__Bacteria	p__Firmicutes	c__Clostridia	o__Oscillospirales	f__Ruminococcaceae	g__UBA1819	sp134		7	0	0	0	7	0	0	0	0	0	0	32	0	0	0	0	0	0	0	0	0	0	0	0	0	0	0	0	0	27	0	0	0	0	59	0	71	0	6	0	0	0
d__Bacteria	p__Firmicutes	c__Clostridia	o__Oscillospirales	f__Ruminococcaceae	g__[Eubacterium]_siraeum_group	sp135		0	0	0	0	0	0	0	0	0	0	0	0	0	0	0	0	0	0	0	0	0	0	0	0	0	0	0	0	0	0	0	0	0	0	26	0	0	0	0	0	0	0
d__Bacteria	p__Firmicutes	c__Clostridia	o__Oscillospirales	f__Ruminococcaceae	g__[Eubacterium]_siraeum_group	sp136		86	59	0	15	42	186	0	28	49	143	188	109	0	0	0	67	23	45	231	0	0	0	0	0	181	30	0	15	76	45	0	20	38	25	15	31	55	51	31	51	0	86
d__Bacteria	p__Firmicutes	c__Clostridia	o__Oscillospirales	f__Ruminococcaceae	g__uncultured	sp137		0	0	5	0	0	0	0	0	0	0	41	39	70	0	0	0	0	0	0	0	0	0	0	0	0	0	0	0	0	0	0	0	0	0	12	0	0	0	0	0	0	0
d__Bacteria	p__Firmicutes	c__Clostridia	o__Oscillospirales	f__Ruminococcaceae	g__uncultured	sp138		40	51	25	11	30	287	131	275	246	259	272	272	680	45	124	12	7	10	77	0	28	4	0	0	21	0	110	0	39	36	13	4	38	40	129	38	131	60	6	36	107	35
d__Bacteria	p__Firmicutes	c__Clostridia	o__Oscillospirales	f__UCG-010	g__UCG-010	sp139		8	94	3	79	10	0	41	0	15	0	0	6	46	5	61	56	64	68	36	63	24	39	110	129	0	34	77	61	119	27	0	54	0	6	23	33	13	6	5	0	0	14
d__Bacteria	p__Firmicutes	c__Clostridia	o__Oscillospirales	f__[Eubacterium]_coprostanoligenes_group	g__[Eubacterium]_coprostanoligenes_group	sp140		238	0	0	0	172	40	151	23	0	0	0	0	0	0	0	0	74	102	0	89	0	127	70	64	149	121	190	94	98	18	102	129	0	26	0	0	0	0	0	114	49	64
d__Bacteria	p__Firmicutes	c__Clostridia	o__Peptococcales	f__Peptococcaceae	g__Peptococcus	sp141		0	0	0	0	0	0	0	0	0	0	0	0	0	0	2	0	0	0	0	0	0	0	0	0	0	0	2	0	0	0	0	0	0	0	0	0	0	0	0	0	0	0
d__Bacteria	p__Firmicutes	c__Clostridia	o__Peptococcales	f__Peptococcaceae	g__Peptococcus	sp142		12	26	6	3	7	82	29	54	50	90	111	61	100	0	39	8	19	8	24	0	12	3	0	0	10	0	0	0	15	0	7	5	0	0	43	7	12	31	0	30	0	7
d__Bacteria	p__Firmicutes	c__Clostridia	o__Peptococcales	f__Peptococcaceae	g__uncultured	sp143		16	16	36	23	29	59	0	66	44	58	48	44	177	72	87	26	0	0	67	0	24	0	6	0	0	0	42	11	32	26	16	8	0	0	69	44	102	67	22	35	43	24
d__Bacteria	p__Firmicutes	c__Clostridia	o__Peptostreptococcales-Tissierellales	f__Anaerovoracaceae	__	sp144		0	0	0	0	0	0	0	0	0	0	2	0	11	0	0	0	0	0	0	0	0	0	8	0	2	0	0	0	0	0	0	0	0	0	5	3	7	4	0	0	0	0
d__Bacteria	p__Firmicutes	c__Clostridia	o__Peptostreptococcales-Tissierellales	f__Anaerovoracaceae	g__Anaerovorax	sp145		2	3	0	0	2	7	0	0	0	9	18	8	26	0	0	0	0	0	0	0	0	0	0	0	0	0	0	0	0	0	0	0	0	6	0	4	13	0	0	0	0	3
d__Bacteria	p__Firmicutes	c__Clostridia	o__Peptostreptococcales-Tissierellales	f__Anaerovoracaceae	g__Family_XIII_AD3011_group	sp146		0	0	0	0	0	0	0	0	0	0	0	0	0	0	0	0	0	0	0	0	0	0	0	0	15	0	0	0	0	0	0	0	0	0	0	0	7	5	0	0	0	0
d__Bacteria	p__Firmicutes	c__Clostridia	o__Peptostreptococcales-Tissierellales	f__Anaerovoracaceae	g__Family_XIII_AD3011_group	sp147		7	15	0	0	0	0	4	0	0	0	0	0	0	0	0	0	7	0	0	0	0	0	0	0	0	0	8	0	10	3	13	0	5	3	5	0	0	0	0	0	0	0
d__Bacteria	p__Firmicutes	c__Clostridia	o__Peptostreptococcales-Tissierellales	f__Anaerovoracaceae	g__Family_XIII_UCG-001	sp148		0	5	0	6	0	0	0	0	0	0	0	5	0	22	0	8	0	0	17	0	0	0	0	0	0	0	0	0	0	11	3	0	12	0	35	0	19	4	0	0	38	0
d__Bacteria	p__Firmicutes	c__Clostridia	o__Peptostreptococcales-Tissierellales	f__Anaerovoracaceae	g__[Eubacterium]_brachy_group	sp149		0	0	0	0	0	0	0	0	0	0	0	0	8	0	0	0	5	3	0	0	0	17	0	0	0	0	0	0	5	13	0	0	0	0	0	0	0	0	0	0	5	0
d__Bacteria	p__Firmicutes	c__Clostridia	o__Peptostreptococcales-Tissierellales	f__Anaerovoracaceae	g__[Eubacterium]_nodatum_group	sp150		18	30	0	0	14	0	0	0	5	0	0	0	5	0	0	0	0	9	11	0	0	10	0	12	0	6	0	0	0	0	23	13	26	0	3	0	8	0	9	0	0	0
d__Bacteria	p__Firmicutes	c__Clostridia	o__Peptostreptococcales-Tissierellales	f__Peptostreptococcaceae	g__Romboutsia	sp151		0	0	0	0	2	0	0	0	0	0	0	0	0	0	0	0	0	0	0	0	0	0	0	0	0	0	0	0	0	0	0	0	0	0	0	0	0	0	0	0	0	0
d__Bacteria	p__Proteobacteria	c__Alphaproteobacteria	o__Caulobacterales	f__Caulobacteraceae	g__Caulobacter	sp152		0	0	0	0	0	0	0	0	0	0	0	0	0	0	0	0	0	0	0	0	0	0	0	0	0	0	0	0	0	0	0	0	0	0	0	0	0	0	0	0	0	0
d__Bacteria	p__Proteobacteria	c__Alphaproteobacteria	o__Rhizobiales	f__Xanthobacteraceae	g__Bradyrhizobium	sp153		0	0	3	0	0	0	0	0	0	0	0	0	0	0	0	0	0	0	0	0	0	0	0	0	0	0	0	0	0	0	0	0	0	0	0	0	0	0	0	0	0	0
d__Bacteria	p__Proteobacteria	c__Alphaproteobacteria	o__Rhizobiales	f__Xanthobacteraceae	g__Bradyrhizobium	sp154		2	0	0	0	0	0	0	0	0	0	0	0	0	0	0	0	0	0	0	0	0	0	0	0	0	0	0	0	0	0	0	0	0	0	2	0	0	0	0	0	0	0
d__Bacteria	p__Proteobacteria	c__Alphaproteobacteria	o__Rhodobacterales	f__Rhodobacteraceae	g__Tateyamaria	sp155		0	0	0	0	0	0	0	0	0	0	0	0	0	0	0	0	0	0	0	0	0	0	0	0	0	0	0	0	0	0	0	0	0	0	0	0	0	0	0	0	0	0
d__Bacteria	p__Proteobacteria	c__Alphaproteobacteria	o__Rhodospirillales	f__uncultured	g__uncultured	sp156		31	19	49	0	97	0	0	0	28	28	0	0	0	0	97	16	148	0	81	103	108	35	60	76	154	43	55	0	75	8	48	46	0	4	105	12	12	0	0	0	0	23
d__Bacteria	p__Proteobacteria	c__Alphaproteobacteria	o__Rickettsiales	f__Mitochondria	g__Mitochondria	sp157		0	0	0	0	0	0	0	0	0	0	0	0	0	0	0	0	0	0	0	0	0	0	0	0	0	0	0	0	0	0	0	0	0	0	0	0	0	0	0	0	0	0
d__Bacteria	p__Proteobacteria	c__Alphaproteobacteria	o__Rickettsiales	f__Mitochondria	g__Mitochondria	sp158		12	0	0	0	0	0	0	0	0	0	0	0	0	0	0	0	0	9	0	0	0	0	0	0	0	0	0	0	0	0	0	0	0	5	0	0	0	0	0	0	0	0
d__Bacteria	p__Proteobacteria	c__Alphaproteobacteria	o__Sphingomonadales	f__Sphingomonadaceae	g__Sphingomonas	sp159		0	0	0	0	0	0	0	0	0	0	0	0	0	0	0	0	0	0	0	0	0	0	0	0	0	0	0	0	0	0	0	0	0	0	0	0	0	0	0	0	0	0
d__Bacteria	p__Proteobacteria	c__Gammaproteobacteria	o__Burkholderiales	f__Burkholderiaceae	g__Ralstonia	sp160		0	0	0	3	0	0	0	0	0	0	34	37	17	0	0	0	0	0	0	0	0	15	0	0	20	0	0	17	0	0	0	0	0	0	0	0	0	0	0	0	0	0
d__Bacteria	p__Proteobacteria	c__Gammaproteobacteria	o__Burkholderiales	f__Comamonadaceae	g__Pelomonas	sp161		0	0	0	0	0	0	0	0	0	0	0	3	0	0	0	0	0	0	0	0	0	0	0	0	0	0	0	0	0	0	0	0	0	0	0	0	0	0	0	0	0	0
d__Bacteria	p__Proteobacteria	c__Gammaproteobacteria	o__Burkholderiales	f__Methylophilaceae	g__uncultured	sp162		0	0	0	0	0	0	0	0	0	0	0	0	0	0	0	0	0	0	0	0	0	0	0	0	0	0	0	0	0	0	0	0	0	0	0	0	0	0	0	0	0	0
d__Bacteria	p__Proteobacteria	c__Gammaproteobacteria	o__Burkholderiales	f__Sutterellaceae	g__Parasutterella	sp163		43	28	15	21	22	0	83	0	0	0	0	106	0	0	18	0	42	0	9	0	24	22	0	9	27	47	6	17	27	0	12	0	0	21	14	12	5	11	0	5	0	13
d__Bacteria	p__Proteobacteria	c__Gammaproteobacteria	o__Burkholderiales	f__Sutterellaceae	g__Parasutterella	sp164		24	0	0	2	8	0	0	0	0	0	0	0	0	6	17	0	15	4	0	6	22	36	39	23	29	27	23	86	60	14	3	23	0	27	17	0	6	13	42	0	11	0
d__Bacteria	p__Proteobacteria	c__Gammaproteobacteria	o__Enterobacterales	f__Enterobacteriaceae	g__Escherichia-Shigella	sp165		0	0	0	0	13	0	64	0	10	22	0	62	22	0	0	0	0	0	0	0	0	0	0	0	0	0	20	7	21	12	67	164	31	13	0	0	0	0	0	0	0	11
d__Bacteria	p__Proteobacteria	c__Gammaproteobacteria	o__Enterobacterales	f__Enterobacteriaceae	g__Escherichia-Shigella	sp166		0	0	0	0	0	14	0	0	0	0	0	0	0	0	0	0	0	0	0	0	0	0	0	0	0	0	0	0	0	0	0	0	0	0	0	0	0	0	0	0	0	0
d__Bacteria	p__Proteobacteria	c__Gammaproteobacteria	o__Enterobacterales	f__Enterobacteriaceae	g__Escherichia-Shigella	sp167		0	0	0	0	0	0	0	0	0	0	0	0	0	0	0	0	0	0	0	0	0	0	0	0	0	0	0	0	0	0	0	0	0	0	0	0	0	0	0	0	0	0
d__Bacteria	p__Proteobacteria	c__Gammaproteobacteria	o__Pseudomonadales	f__Moraxellaceae	g__Acinetobacter	sp168		0	0	0	3	0	0	0	0	0	0	0	0	0	0	0	0	0	0	0	0	0	0	0	0	0	0	0	0	0	0	0	0	0	0	0	0	0	0	0	0	0	0
d__Bacteria	p__Proteobacteria	c__Gammaproteobacteria	o__Pseudomonadales	f__Pseudomonadaceae	g__Pseudomonas	sp169		0	0	0	0	0	0	0	0	0	0	0	0	0	0	0	0	0	0	0	0	0	0	0	0	0	0	0	0	0	0	0	0	0	0	0	0	0	0	0	0	0	0
d__Bacteria	p__Proteobacteria	c__Gammaproteobacteria	o__Pseudomonadales	f__Pseudomonadaceae	g__Pseudomonas	sp170		0	0	0	0	0	0	0	0	0	0	0	0	0	0	0	0	0	0	0	0	0	0	0	0	0	0	0	0	0	0	0	0	0	0	0	0	0	0	0	0	0	0
d__Bacteria	p__Verrucomicrobiota	c__Verrucomicrobiae	o__Verrucomicrobiales	f__Akkermansiaceae	g__Akkermansia	sp171		0	368	193	37	243	0	0	0	0	0	0	0	0	0	0	0	0	0	0	9	9	32	0	0	0	24	214	66	775	21	4	0	0	0	368	137	200	5	0	0	18	0
[truncated: 26 more columns]

## Sheet: Table S4
Supplementary Table 4: Cecum metabolome of germ-free (GF) and gnotobiotic (14SM) mice.
Concentrations of metabolites detected by CE-TOFMS in cecal contents of gnotobiotic (14SM), and germ-free (GF) mice fed a fiber-rich 1 (FR1) or fiber-free (FF) diet.
	N.D.	Not detected
	Concentration	>500µM
	S/N	>10.0
[nmol/g (Cecal contents of mice)]
KEGG ID	Compound Name	Cecal content																Average				S.D.
		Germ-free								14SM
		Fiber-rich 1				Fiber-free				Fiber-rich 1				Fiber-free
		AF20_BC_191	AF20_BC_192	AF20_BC_194	AF20_BC_195	AF20_BC_196	AF20_BC_197	AF20_BC_198	AF20_BC_205	AF19_BC_214	AF19_BC_215	AF19_BC_216	AF20_BC_206	AF19_BC_217	AF19_BC_218	AF19_BC_219	AF20_BC_209	Germfree		14SM		Germfree		14SM
		nmol/g	nmol/g	nmol/g	nmol/g	nmol/g	nmol/g	nmol/g	nmol/g	nmol/g	nmol/g	nmol/g	nmol/g	nmol/g	nmol/g	nmol/g	nmol/g	FR1	FF	FR1	FF	FR1	FF	FR1	FF
C00024	Acetyl CoA	0	0	0	0	0	0	0	0	0	0	0	1.79132	0	0	0	0	0	0	0.44783	0	0	0	0.89566	0
C01996	Acetylcholine	0.450629	0.445436	0.9831	0.421042	1.04742	0.633476	0.675138	0.753934	1.66869	2.59757	1.38049	1.26343	10.6	7.08124	11.1106	19.8363	0.575052	0.777493	1.72755	12.1571	0.272338	0.186758	0.604502	5.42386
C00147	Adenine	0	0	0	0	0	0	0	0	15.1487	18.3767	18.4917	22.2919	10.5707	10.8626	6.80494	14.2202	0	0	18.5772	10.6146	0	0	2.92124	3.03191
C00212	Adenosine	33.3795	19.4128	52.0048	19.3492	25.2025	1.57379	4.18951	2.28162	23.7351	31.4541	31.9108	36.5419	7.83333	11.5864	8.05299	18.0704	31.0366	8.31186	30.9105	11.3858	15.4582	11.3145	5.30704	4.77673
C06104	Adipate	0	0	0	0	0	0	0	0	36.6217	36.2999	30.8453	27.1412	0	0	0	0	0	0	32.727	0	0	0	4.57077	0
C03626	ADMA	13.5558	16.8767	12.5102	7.73947	11.8846	13.7629	11.0641	11.4296	73.7278	87.7802	81.4105	56.0771	35.8335	31.7507	45.4892	43.3426	12.6705	12.0353	74.7489	39.104	3.77785	1.19965	13.7097	6.41624
C00008	ADP	3.84196	0	4.30938	0	0	0	0	0	8.44266	0	6.34852	21.5586	0	0	0	0	2.03783	0	9.08745	0	2.36081	0	9.05593	0
C00301	ADP-ribose	0	0	0	16.1358	11.6312	0	0	0	22.6713	22.1652	26.481	39.2935	0	0	0	0	4.03395	2.90779	27.6527	0	8.0679	5.81558	7.99598	0
C00179	Agmatine	1.66793	2.62198	1.51083	1.25939	0.413916	0	0	0	3.66375	3.95291	3.66571	10.342	0.84269	1.80094	1.2832	1.68231	1.76503	0.103479	5.4061	1.40228	0.595559	0.206958	3.29343	0.433847
C00041	Ala	1408.65	1788.55	2099.95	697.55	2011.12	1574.84	2605.7	1931.65	1233.79	1732.45	1683.05	2145.01	4745.24	3165.91	3939.94	4323.52	1498.68	2030.83	1698.58	4043.65	604.281	427.637	372.7	671.253
C00993	Ala-Ala	18.7743	14.2336	18.8354	10.3952	22.1866	6.27776	22.218	9.48185	376.424	391.477	400.803	535.54	133.893	112.465	117.02	128.66	15.5596	15.0411	426.061	123.009	4.06178	8.37193	73.6739	9.95732
C00499	Allantoate	224.924	163.998	132.274	152.434	61.3094	68.979	46.8617	47.2387	125.968	72.888	111.388	188.747	35.0982	64.9855	69.8754	0	168.408	56.0972	124.748	42.4898	39.8931	10.9068	48.1849	32.2286
C01551	Allantoin	1438.72	1515.75	1035.56	985.603	1686.4	1252.53	1473.88	1344.39	2793.15	2575.35	2527.83	2389.47	1223.7	2140.85	1210.07	959.595	1243.91	1439.3	2571.45	1383.56	272.017	188.101	167.519	519.26
C00956	alpha-Aminoadipate	32.5261	39.2762	48.4774	11.1051	10.392	9.55788	7.71094	8.78102	24.3888	36.3893	27.4227	29.511	11.7072	11.1989	8.85851	8.83474	32.8462	9.11047	29.4279	10.1499	15.9003	1.1416	5.09514	1.51911
C02115	Alpha-Methylserine	0	0	0	0	0	0	0	0	17.5837	14.8415	20.5829	23.7593	10.5665	11.4209	10.6547	11.6228	0	0	19.1919	11.0662	0	0	3.8431	0.53373
C00020	AMP	11.2272	3.48224	36.5647	24.306	3.6224	0	3.57051	0	60.9635	48.8769	48.6352	184.157	13.3008	17.0671	9.38539	38.8778	18.895	1.79823	85.6583	19.6578	14.5813	2.07652	65.9179	13.1916
C01262	Anserine	41.8636	44.4064	39.7007	23.0889	1.69715	1.56873	1.62229	1.43484	28.1945	35.2112	30.9625	39.1159	1.69981	2.18197	1.71361	1.91854	37.2649	1.58075	33.371	1.87848	9.64436	0.110616	4.79537	0.225696
C00108	Anthranilate	0	0	0	0	0	0	0	0	0	0	0	4.86098	0	0	0	0	0	0	1.21525	0	0	0	2.43049	0
C00062	Arg	1686.82	2162.83	1994.09	1004.95	2012.55	1740.21	2090.48	1939.36	173.188	234.037	231.175	202.034	1662.89	724.877	653.52	270.932	1712.17	1945.65	210.108	828.054	511.003	150.218	28.5465	591.169
C03406	Argininosuccinate	140.175	86.213	78.9857	59.8929	97.6731	59.7112	58.2381	64.0401	90.0642	95.8316	87.2893	119.054	80.4371	82.7339	55.6592	89.0024	91.3167	69.9156	98.0598	76.9582	34.4128	18.6681	14.4414	14.6534
C00152	Asn	2441.24	3636.39	3511.4	1012.73	3600.05	3590.52	3546.93	3913.13	46.9272	62.0862	62.9646	90.4129	92.5705	69.8799	58.5739	39.4376	2650.44	3662.66	65.5977	65.1155	1216.44	168.573	18.1075	22.2008
C00049	Asp	1868.52	1855.7	1738.92	1040.35	2931.04	2603.4	2508.57	2730.51	1393.97	1272.17	1397.33	2787.49	1984.81	1258.17	1063.27	1099.24	1625.87	2693.38	1712.74	1351.37	394.681	182.677	718.861	430.7
C08261	Azelate	44.5881	49.1693	42.7703	16.0243	39.4996	36.6649	29.4263	25.9883	51.756	54.5419	41.2322	35.4071	33.0757	31.7747	34.6221	32.5629	38.138	32.8948	45.7343	33.0088	14.9863	6.26009	8.95834	1.20123
C00813	Barbiturate	0	0	0	0	0	0	0	0	0	0	0	44.2471	0	0	0	0	0	0	11.0618	0	0	0	22.1236	0
C00099	beta-Ala	36.9297	43.9501	47.4711	19.3918	8.03504	7.95583	12.2891	11.7196	74.5414	87.4958	80.4379	81.0681	43.6889	44.3351	55.8308	61.567	36.9357	9.99989	80.8858	51.3555	12.4898	2.32643	5.2971	8.80085
C05341	beta-Ala-Lys	0	0.980369	0.896894	0.382203	0	0	0	0	0	0	0	0	0	0	0	0	0.564867	0	0	0	0.46019	0	0	0
C00719	Betaine	82.9783	86.9642	150.248	102.388	123.665	113.084	137.485	114.81	438.809	525.128	447.101	465.773	332.026	259.443	310.673	739.212	105.645	122.261	469.203	410.338	30.891	11.1579	38.9516	221.354
C00576	Betaine aldehyde	0	33.3797	42.4339	24.337	66.7679	80.0973	93.4273	86.4287	29.11	31.1478	28.4713	41.7619	27.0362	0	42.0389	55.6403	25.0377	81.6803	32.6228	31.1789	18.2537	11.3347	6.19875	23.8438
C00246	Butyrate	0	0	0	0	0	0	77.6242	41.1329	679.345	835.849	644.703	11096.4	2086.91	3151.44	2267.72	2580.24	0	29.6893	3314.06	2521.58	0	37.3792	5188.86	466.742
C01672	Cadaverine	5.0876	9.77387	4.0532	6.78533	1.14144	1.42866	1.06827	2.62431	106.74	240.879	115.896	19.6364	1965.14	466.971	2116.43	152.713	6.425	1.56567	120.788	1175.31	2.50059	0.722698	91.0583	1009.45
C00575	cAMP	0	0	9.42915	0	0	0	0	0	14.2226	0	0	0	0	0	0	0	2.35729	0	3.55565	0	4.71458	0	7.11131	0
C00438	Carbamoylaspartate	0	0	0	0	0	0	0	0	50.2776	57.1624	26.5438	45.3454	20.3676	20.733	12.6925	22.5103	0	0	44.8323	19.0758	0	0	13.1201	4.35727
C00318	Carnitine	51.7725	46.0724	69.6355	45.2794	81.5725	55.0933	74.2565	57.552	11.3353	20.4917	36.5786	26.1786	91.5305	72.4884	50.8904	111.336	53.1899	67.1186	23.646	81.5614	11.3388	12.8581	10.5699	25.8776
C00386	Carnosine	0.939647	1.08028	1.2522	0	2.3186	2.19999	1.57969	1.94928	0	0.753872	0	0	0	0	0	0	0.818031	2.01189	0.188468	0	0.560131	0.326684	0.376936	0
C02256	Castanospermine	0	0	0	0	0	0	0	0	4.71221	0	2.46916	2.66161	0	0	0	0	0	0	2.46075	0	0	0	1.92914	0
C00695	Cholate	0	0	0	0	0	0	0	0	0	0	0	30.024	0	0	0	9.973	0	0	7.50599	2.49325	0	0	15.012	4.9865
C00114	Choline	748.367	1196.75	3150.65	621.373	3733.47	2067.73	3369.22	4347.56	2152.1	2774.88	1896.25	1695	7974.87	7769.24	5484.82	12940.9	1429.29	3379.49	2129.56	8542.46	1173.82	963.203	469.118	3141.96
C00417	cis-Aconitate	9.82844	12.3301	6.40612	4.61302	0	0	2.52149	0	0	0	0	7.89799	12.4908	0	5.01743	0	8.29442	0.630372	1.9745	4.37705	3.45246	1.26074	3.949	5.90365
C02226	Citraconate	15.287	10.9607	13.1897	4.55743	44.6501	26.4863	17.5757	11.0601	32.0723	44.9508	26.8246	41.4601	7.53923	19.4503	9.92248	7.49962	10.9987	24.9431	36.3269	11.1029	4.64332	14.5804	8.34898	5.67907
C02614	Citramalate	0	0	0	0	0	0	0	0	244.133	375.081	198.494	150.525	0	0	0	0	0	0	242.058	0	0	0	96.5669	0
C00158	Citrate	186.797	285.974	142.59	208.159	45.2108	8.98118	11.2072	18.2736	261.466	138.842	109.225	508.48	123.687	6.29107	101.764	23.4775	205.88	20.9182	254.503	63.8047	59.9724	16.6725	181.692	57.6218
C00327	Citrulline	111.13	156.207	152.45	51.2883	125.205	84.2246	82.1758	80.5707	440.187	432.922	473.224	158.125	1694.76	902.757	928.46	745.01	117.769	93.0441	376.114	1067.75	48.799	21.4928	146.381	425.804
C00055	CMP	2.97906	0	6.51333	0	0	0	3.81605	0	11.2002	12.6033	10.0725	25.4369	46.1714	52.9301	29.7993	32.4782	2.3731	0.954013	14.8282	40.3448	3.09688	1.90803	7.14783	11.0367
C00128	CMP-N-acetylneuraminate	10.2092	6.22658	10.7293	6.61422	19.9416	0	11.2374	5.85076	0	0	0	14.3704	11.8393	0	0	9.80049	8.44483	9.25744	3.5926	5.40995	2.35257	8.47304	7.18521	6.30208
C00300	Creatine	1244.38	821.957	1134.14	776.138	3659.54	2759.9	2727.43	2340.37	2104.54	2298.21	3052.36	2170.72	3169.28	3046.99	3045.98	5072.17	994.154	2871.81	2406.46	3583.61	230.501	558.666	438.04	994.065
C00791	Creatinine	1818.53	1646.75	1554.42	1153.97	315.572	139.485	98.5823	159.543	1490.28	1815.9	1478.05	1311.63	181.373	432.789	137.568	128.145	1543.42	178.296	1523.97	219.969	281.755	94.9684	210.993	143.763
C00506	Cysteate	0	0	0	0	0	0	0	0	20.3534	26.0919	23.2771	15.5224	0	0	0	7.39127	0	0	21.3112	1.84782	0	0	4.51469	3.69564
C05824	Cysteine S-sulfate	298.667	360.28	326.762	188.169	1311.91	1778.8	1736.87	1932.88	5.10384	9.34012	0	0	70.5533	96.4025	70.5895	106.441	293.47	1690.12	3.61099	85.9965	74.5815	265.848	4.51405	18.2767
C00606	Cysteine sulfinate	36.2896	0	39.4387	0	46.6405	51.6324	29.2941	56.4689	0	0	0	0	0	0	0	0	18.9321	46.009	0	0	21.8986	11.8437	0	0
-	Cysteine-glutathione disulphide	24.3643	9.42629	23.2748	19.5521	77.8405	4.00158	28.6695	6.26741	0	2.54557	6.59112	15.3656	0	2.3846	0	2.6211	19.1544	29.1947	6.12558	1.25142	6.80479	34.2882	6.73137	1.44824
C00491	Cystine	213.369	157.161	121.426	102.879	215.453	244.783	547.677	273.397	2.53817	4.0536	3.75344	4.43772	58.768	72.2176	123.441	28.8959	148.709	320.328	3.69573	70.8306	48.6385	153.401	0.820952	39.4707
C00475	Cytidine	338.119	316.513	285.965	248.842	370.807	368.342	366.52	364.539	66.5789	61.092	55.1204	40.9836	61.4656	59.7441	49.5375	40.4559	297.36	367.552	55.9437	52.8008	38.7812	2.66865	11.0166	9.76958
C00380	Cytosine	2.32012	3.18352	2.18733	2.359	0	0	0	0	0	1.64632	0	3.25611	2.24143	1.92818	2.41089	0	2.51249	0	1.22561	1.64512	0.453349	0	1.56036	1.11483
C00857	Deamido-NAD+	0	0	0	0	0	0	0	0	71.8723	86.9995	50.9186	16.7506	0	0	0	0	0	0	56.6352	0	0	0	30.4282	0
C01571	Decanoate	27.236	27.7885	40.3984	18.8328	28.914	33.2256	36.2027	24.505	30.9819	22.4699	0	15.0149	90.5777	342.791	59.3909	45.5199	28.5639	30.7118	17.1167	134.57	8.89034	5.10636	13.1441	140.087
C06772	Diethanolamine	0	3.07492	9.41411	0	0	2.98822	0	0	3.7832	8.0531	0	12.6683	0	19.3791	2.17655	0.163916	3.12226	0.747056	6.12615	5.42988	4.43797	1.49411	5.46296	9.35197
C02273	Digalacturonate	12.6457	8.44955	0	0	0	0	0	0	0	0	0	0	0	0	0	0	5.27383	0	0	0	6.32606	0	0	0
C02678	Dodecanedioate	0.88917	0.762345	0	1.56971	1.09181	1.01869	1.23745	1.28708	0.819958	1.25913	0	0.757931	1.23023	1.02543	1.62181	1.31711	0.805306	1.15876	0.709254	1.29864	0.643353	0.124851	0.522821	0.247725
C02679	Dodecanoate	30.6569	34.1203	0	23.6057	41.1116	36.5768	66.1018	39.1769	22.478	0	0	0	95.6963	283.494	70.0055	49.6172	22.0957	45.7418	5.61949	124.703	15.3665	13.6999	11.239	107.526
C00355	DOPA	47.9128	52.4887	32.0639	33.128	2.016	0	1.65065	1.72894	2.12169	2.98794	2.38623	3.07382	2.66374	0	2.52991	1.52216	41.3983	1.3489	2.64242	1.67895	10.3435	0.912878	0.462702	1.22982
C03758	Dopamine	0	0	0	0	0	0	0	0	4.97854	4.07817	4.41432	3.28336	0	0	0	0	0	0	4.1886	0	0	0	0.708661	0
C00363	dTDP	0	0	0	0	0	0	0	0	0	0	0	8.4565	0	0	0	0	0	0	2.11413	0	0	0	4.22825	0
C00364	dTMP	0	0	0	0	0	0	0	0	15.911	17.9049	10.0317	15.5707	0	0	0	15.6776	0	0	14.8546	3.91939	0	0	3.37607	7.83878
C00085	F6P	0	0	0	0	0	0	0	0	40.7134	47.4303	30.6047	42.5251	0	0	0	0	0	0	40.3184	0	0	0	7.07015	0
C00016	FAD	0	0	0	0	0	0	0	0	19.7181	21.4739	18.6046	37.0246	13.9422	8.95773	0	14.3194	0	0	24.2053	9.30483	0	0	8.62748	6.66712
C00122	Fumarate	15.3517	19.5062	33.0638	13.4367	30.4034	0	29.1661	10.914	67.1416	99.8748	61.1231	63.3337	97.9996	101.821	56.2255	105.245	20.3396	17.6209	72.8683	90.3229	8.85304	14.7441	18.1751	22.9234
C00103	G1P	0	0	0	0	0	0	0	0	25.0794	29.8634	21.5001	67.0788	0	0	0	0	0	0	35.8804	0	0	0	21.0792	0
C00092	G6P	0	0	0	0	0	0	0	0	246.78	244.32	132.293	304.688	7.71311	7.65363	6.79719	42.2824	0	0	232.02	16.1116	0	0	72.1	17.4522
C00334	GABA	85.7918	90.4643	84.7744	24.4673	25.0355	17.0497	14.7192	0	126.244	137.885	149.495	101.059	94.6149	62.9063	72.9089	4.23506	71.3745	14.2011	128.671	58.6663	31.3694	10.4473	20.7111	38.6259
C01181	gamma-Butyrobetaine	3.26911	3.87832	3.69372	3.71434	2.44688	1.74031	2.28738	1.89846	75.4136	84.0781	91.013	63.5657	53.569	46.0178	73.8784	21.3841	3.63887	2.09326	78.5176	48.7123	0.259978	0.329266	11.8357	21.6872
C01035	gamma-Guanidinobutyrate	66.3639	68.4216	68.5774	21.8297	75.9384	70.3635	49.6403	87.7203	112.457	128.934	115.84	71.1864	17.2382	39.374	17.8844	22.5363	56.2982	70.9156	107.104	24.2582	23.0011	15.9224	24.9772	10.3499
C00064	Gln	2070.03	3061.44	2992.26	996.194	2892.27	2661.3	2934.6	3086.66	962.597	1513.82	1115.2	1705.71	1294.1	675.33	491.056	477.124	2279.98	2893.71	1324.33	734.402	967.851	175.992	344.454	383.908
C00025	Glu	4667.75	4547.18	4238.31	2712.33	10441.2	9644.8	7836.92	9752	2319.57	2474.81	2709.17	7605.74	3968.85	3336.72	2890.46	3036.34	4041.39	9418.72	3777.32	3308.09	904.308	1112	2557.29	478.081
C00257	Gluconate	20120.9	16456.2	17658.4	9447.97	3485.33	2804.35	2615.09	2378.62	1597.15	1848.34	1195.18	1460.27	880.305	1759.04	795.543	663.228	15920.9	2820.85	1525.23	1024.53	4576.92	475.994	272.475	497.757
C03752	Glucosaminate	13.871	10.7236	9.56808	11.869	0	0	0	0	22.7031	24.8265	22.363	21.4862	0	0	0	0	11.5079	0	22.8447	0	1.83419	0	1.41715	0
C00329	Glucosamine	200.334	232.103	141.279	125.826	102.629	64.6106	45.1813	53.098	95.8983	29.1783	30.8575	46.1973	44.0524	13.7345	29.8679	15.4977	174.886	66.3797	50.5329	25.7881	49.8589	25.4487	31.1981	14.1587
C00191	Glucuronate	2409.81	1833.94	1667.89	1593.18	8917.5	9081.8	7331.56	8737.82	97.704	116.393	56.4297	93.2908	138.602	239.919	121.838	204.232	1876.2	8517.17	90.9543	176.148	369.691	802.789	25.1004	55.422
C01425	Glu-Glu	9.03534	10.3326	8.77673	5.33704	11.3719	8.95169	12.4278	11.5851	6.22623	7.75295	8.2229	8.08061	93.8261	165.864	143.01	233.573	8.37042	11.0841	7.57067	159.068	2.13374	1.49294	0.917638	58.056
C00489	Glutarate	19.048	21.9898	0	0	21.1077	0	0	0	365.037	399.126	292.256	204.177	28.9809	30.1072	26.1612	28.0743	10.2595	5.27692	315.149	28.3309	11.9073	10.5538	86.3711	1.66846
C00127	Glutathione(ox)	16.8306	5.81919	29.4655	15.2768	30.2113	0	4.15385	0	0	0	0	20.0889	0	0	0	0	16.848	8.59129	5.02223	0	9.71778	14.5458	10.0445	0
C00051	Glutathione(red)	0	0	0	0	0	0	0	0	0	0	4.78853	11.0242	0	0	0	0	0	0	3.95319	0	0	0	5.22662	0
C00037	Gly	2127.2	3304.25	3427.61	656.836	2880.47	2708.22	3107.32	3165.82	746.1	1173.81	1075.56	649.279	3145.16	2368.28	3663.19	4064.46	2378.97	2965.46	911.189	3310.27	1289.05	211.081	252.878	732.112
C00258	Glycerate	323.384	290.579	302.525	0	290.387	315.296	429.381	230.172	248.763	279.516	209.286	319.94	346.956	373.957	364.603	420.907	229.122	316.309	264.376	376.606	153.348	83.4221	46.8872	31.5847
C00093	Glycerophosphate	6.57651	0	10.3033	10.1719	0	0	9.19339	0	52.8048	43.0761	41.3235	120.743	25.5094	9.58943	0	30.0152	6.76292	2.29835	64.4867	16.2785	4.82794	4.5967	37.8424	13.948
C00670	Glycerophosphorylcholine	227.142	129.573	267.577	180.655	418.983	36.5211	174.701	100.325	94.7331	175.849	217.049	438.705	98.2377	37.8369	26.6658	77.1024	201.237	182.633	231.584	59.9607	59.5297	167.379	147.134	33.4513
C00160	Glycolate	282.238	345.027	330.359	0	186.716	263.071	351.005	219.713	306.095	370.473	289.497	389.367	505.005	708.505	485.536	572.561	239.406	255.126	338.858	567.902	161.842	71.157	48.5132	100.881
C02037	Gly-Gly	39.6086	56.2962	45.7646	10.9873	79.803	88.2536	84.7904	92.6708	12.2302	17.6342	13.7898	10.5974	21.4012	11.4558	13.9928	17.0867	38.1642	86.3795	13.5629	15.9841	19.3839	5.44269	3.01093	4.28299
C02155	Gly-Leu	15.1455	15.7294	13.5558	8.54976	16.1286	16.1362	30.0857	20.3122	0	0	3.37488	0	81.9141	49.4528	39.5668	25.0712	13.2451	20.6657	0.843719	49.0012	3.2622	6.58187	1.68744	24.1186
C00144	GMP	0	0	5.76774	5.35816	0	0	0	0	0	0	0	20.4263	6.57468	4.36767	0	4.93653	2.78148	0	5.10658	3.96972	3.21612	0	10.2132	2.80699
C00581	Guanidinoacetate	6.99277	8.33254	8.25749	6.43951	6.3386	5.44766	7.19905	5.88077	8.44016	10.2787	12.8197	10.7974	11.1771	8.35228	7.02668	11.9091	7.50558	6.21652	10.584	9.61628	0.939628	0.749254	1.80123	2.30916
C03139	Guanidinosuccinate	15.6571	7.84566	7.06435	7.8327	22.1355	17.0927	11.3897	16.1684	29.6589	21.7165	30.6222	20.1363	20.5931	41.7664	15.3526	19.8432	9.59995	16.6966	25.5335	24.3888	4.05458	4.4038	5.37318	11.8139
C00242	Guanine	28.3309	19.7253	29.1805	19.5356	2.27819	1.74381	2.44722	2.81381	18.3882	19.7273	22.0047	23.2251	29.2022	23.6822	15.3225	11.6554	24.1931	2.32076	20.8363	19.9656	5.28042	0.444887	2.18284	7.9529
C00387	Guanosine	593.798	437.421	441.733	372.363	671.451	878.633	775.872	758.998	102.17	117.023	95.3054	83.2177	166.925	106.677	66.4829	55.1429	461.329	771.238	99.4291	98.8071	93.8414	84.9753	14.1053	50.5088
C17714	Heptanoate	0	0	0	0	0	0	0	0	0	0	0	0	0	13.1417	0	10.6888	0	0	0	5.95761	0	0	0	6.95175
C01585	Hexanoate	0	0	16.2567	9.11783	15.4876	15.9683	14.7222	12.616	14.4148	0	0	14.7949	23.4974	21.9697	17.1861	24.4226	6.34363	14.6985	7.30243	21.769	7.88348	1.48017	8.43354	3.21829
C00135	His	416.233	593.411	650.14	209.336	664.474	614.491	813.258	762.319	98.8705	114.016	120.715	137.83	347.589	184.163	124.654	106.653	467.28	713.635	117.858	190.765	198.736	90.4454	16.1484	109.671
C00388	Histamine	4.01799	3.53643	4.22361	2.70182	1.05165	1.14863	3.1988	0.932604	19.9016	30.8838	17.9841	3.53007	1.81086	1.25235	0.972784	2.04172	3.61996	1.58292	18.0749	1.51943	0.676454	1.08087	11.2393	0.49257
C00860	Histidinol	0	0	0	0	0	0	0	0	2.8691	2.71346	2.10198	1.35644	0	1.63082	1.10273	1.24328	0	0	2.26024	0.994207	0	0	0.687515	0.699414
C00263	Homoserine	5.64112	4.43122	5.04733	4.08582	7.14189	8.85023	11.8465	11.0889	25.2754	50.2477	30.7163	52.9442	16.2463	37.229	13.2192	28.913	4.80137	9.73189	39.7959	23.9019	0.686707	2.14466	13.8492	11.1871
C01157	Hydroxyproline	244.599	311.151	261.095	85.3239	19.6959	16.9496	20.1568	17.6156	2432.3	2810.39	2582.13	1287.06	91.3762	83.2077	90.2571	56.6362	225.542	18.6045	2277.97	80.3693	97.6682	1.56176	678.654	16.23
C00519	Hypotaurine	71.9549	56.838	93.82	47.2954	354.766	95.2448	197.285	159.374	7.30971	14.2496	29.8616	35.0286	19.0698	0	6.796	10.0531	67.4771	201.667	21.6124	8.97972	20.2854	110.412	12.9977	7.92393
C00262	Hypoxanthine	55.4064	37.6933	75.0056	47.4992	77.9783	21.1428	94.1951	20.5489	41.6927	75.5226	98.2442	67.4309	118.087	53.8806	39.606	52.1619	53.9011	53.4663	70.7226	65.9338	15.8256	38.245	23.3384	35.346
C00407	Ile	577.45	716.003	769.427	227.915	1042.75	1037.57	1529.53	1239.94	83.1055	109.128	127.956	160.584	1706.18	1088.92	1144.82	1036.37	572.699	1212.45	120.193	1244.07	243.678	231.431	32.6067	311.238
C02835	Imidazole-4-acetate	5.0985	3.17851	5.7579	2.77717	10.5515	6.04869	4.68113	6.54212	11.4119	8.67081	12.0995	6.13729	8.07903	9.94874	6.70575	6.08696	4.20302	6.95587	9.57988	7.70512	1.44939	2.52305	2.73146	1.71181
C00130	IMP	0	0	7.76435	18.1308	0	0	0	0	0	0	0	13.9104	0	0	0	0	6.47378	0	3.4776	0	8.59013	0	6.95521	0
C02043	Indolelactate	18.0046	21.8875	17.6824	13.4219	18.8718	17.8881	14.2802	15.4401	48.819	88.6308	53.0079	577.813	16.9277	19.9342	17.2788	18.4353	17.7491	16.6201	192.068	18.144	3.46031	2.1249	257.783	1.35619
C00637	Indole-3-acetaldehyde	298.664	252.829	195.009	201.944	357.406	253.028	326.663	288.696	487.762	480.584	475.641	446.467	289.655	421.36	292.311	248.798	237.112	306.448	472.613	313.031	48.46	45.366	18.1277	74.915
C00954	Indole-3-acetate	16.2496	10.0166	14.5957	12.1929	19.0162	14.8385	14.0625	13.7205	0	0	0	0	22.0953	24.782	18.7236	21.6701	13.2637	15.4094	0	21.8177	2.7313	2.44958	0	2.48055
C00955	Indole-3-ethanol	28.8056	30.5947	23.129	22.0813	25.3056	22.6797	23.6215	24.3338	40.7893	43.3886	41.7768	39.5914	22.6125	23.1888	23.7834	25.4262	26.1527	23.9852	41.3865	23.7527	4.18287	1.11079	1.60622	1.21375
C00294	Inosine	605.875	411.832	535.249	359.844	932.812	867.438	983.22	802.448	594.164	682.859	681.25	534.408	854.866	620.892	539.962	587.152	478.2	896.48	623.171	650.718	112.5	78.5904	72.2405	140.087
C05123	Isethionate	309.42	194.528	153.523	76.6266	347.965	229.459	180.996	218.825	7.04224	9.91532	13.336	0	10.0137	0	0	6.65645	183.524	244.311	7.5734	4.16754	97.1218	72.1643	5.6666	5.00363
C00630	Isobutyryl CoA	0	0	0	0	0	0	0	0	0	0	0	3.50009	0	0	0	0	0	0	0.875022	0	0	0	1.75004	0
C00311	Isocitrate	14.8891	21.5192	0	12.2468	4.44448	0	0	0	0	0	0	0	8.63837	5.91699	0	0	12.1638	1.11112	0	3.63884	8.99845	2.22224	0	4.34617
C05771	Isopropanolamine	1.75443	1.79143	0	0	0	0	0	2.2775	73.0548	188.577	89.7662	120.874	48.2117	45.8827	56.9871	49.105	0.886466	0.569376	118.068	50.0466	1.02371	1.13875	51.0116	4.82223
C00328	Kynurenine	2.46944	2.85391	2.72087	0	0	0	0	0	0	0	0	0	0	0	0	0	2.01105	0	0	0	1.35015	0	0	0
C00186	Lactate	1013.99	1027.37	2633.95	1602.19	2570.55	1413.85	2851.74	1395.41	772.586	2775.99	1871.4	3453.45	1562.76	1012.79	870.837	1236.45	1569.38	2057.89	2218.36	1170.71	760.835	763.038	1161.47	301.599
C00123	Leu	825.11	863.296	1028.38	369.587	1083.43	1066.31	1922.23	1210.32	90.552	122.916	130.996	184.689	3121.98	1533.19	1421.27	1160.97	771.593	1320.57	132.288	1809.35	282.147	406.213	39.0609	888.87
C00047	Lys	1639.54	2189	1973.71	860.083	2469.56	2106.72	2215.18	2427.81	360.278	406.681	452.574	497.477	3976.03	3642.47	4638.12	3290.05	1665.58	2304.82	429.253	3886.67	582.642	172.765	59.0635	573.949
C01930	Lysinamide	0	0	0	0	5.0022	4.12697	4.35404	4.53373	3.15055	3.91612	0	1.75931	5.27652	6.28953	5.7718	6.58352	0	4.50423	2.2065	5.98034	0	0.371358	1.72072	0.576852
C00711	Malate	106.579	100.701	198.379	110.065	93.5662	27.1424	117.114	28.413	1401.83	1460.42	1125.94	1023.92	630.946	408.613	326.156	740.991	128.931	66.5589	1253.03	526.676	46.4598	45.8039	211.184	192.311
C00383	Malonate	194.306	215.117	241.205	96.4991	37.7235	32.1982	41.1445	19.7112	589.427	808.612	553.499	473.967	110.317	153.152	92.2273	169.168	186.782	32.6944	606.376	131.216	63.1726	9.40753	143.195	35.9555
C03570	Mannosamine	45.4408	46.4107	39.9856	29.199	27.9996	16.5893	10.3861	13.6733	36.7961	37.171	26.9739	45.2937	9.73875	0	8.01932	5.373	40.259	17.1621	36.5587	5.78277	7.8971	7.65646	7.49662	4.25285
C00073	Met	235.041	207.561	273.421	87.5046	334.724	251.055	535.465	311.217	82.9446	114.123	114.298	122.264	1290.55	893.828	885.172	683.75	200.882	358.115	108.407	938.325	80.2659	123.371	17.3946	254.084
C02989	Methionine sulfoxide	36.4671	43.6855	55.6564	19.136	54.2403	55.8594	73.0207	60.1852	13.4085	16.5473	33.2779	17.9898	112.208	104.973	94.8865	66.563	38.7363	60.8264	20.3059	94.6577	15.2764	8.50801	8.85701	20.0316
C02704	Methyl sulfate	17.9566	17.9227	11.6041	34.9578	29.7564	31.8266	20.9195	26.7763	39.7573	39.7485	36.3907	26.4396	27.5345	86.4788	91.183	0	20.6103	27.3197	35.584	51.2991	10.0205	4.74367	6.29896	44.8133
C00879	Mucate	152.439	187.214	201.634	46.3219	14.2661	13.3166	27.818	14.0955	0	0	0	0	6.79671	15.0091	7.55849	20.8285	146.902	17.3741	0	12.5482	70.1609	6.97487	0	6.64822
C01026	N,N-Dimethylglycine	6.32307	6.97164	6.15956	3.91656	6.63178	5.65339	5.14483	5.38649	7.47319	8.20229	7.06708	7.25912	5.69846	5.00331	5.23694	7.66578	5.84271	5.70412	7.50042	5.90112	1.33112	0.652387	0.496446	1.21137
C03413	N1,N12-Diacetylspermine	0	0	0	0	0	0.596103	0.560063	0.582369	0	0	0	31.8107	2.13278	1.56767	2.31491	1.33255	0	0.434634	7.95266	1.83698	0	0.290136	15.9053	0.462921
-	N1,N8-Diacetylspermidine	2.26173	2.53262	1.55151	1.57706	1.74103	0	0	1.72464	4.19129	3.30369	3.71518	16.1075	2.70421	3.60654	2.79337	2.34975	1.98073	0.866417	6.82941	2.86347	0.493536	1.00047	6.196	0.531141
C00612	N1-Acetylspermidine	13.319	7.92716	5.28401	7.9833	25.758	16.4271	14.1749	15.555	45.3965	51.372	48.5591	147.083	46.3436	41.5623	50.73	28.7978	8.62836	17.9787	73.1027	41.8584	3.37116	5.26841	49.3807	9.47783
C02567	N1-Acetylspermine	0	0	0	0	0	0	0	0	0	0	0	8.30901	0	0	0	0	0	0	2.07725	0	0	0	4.15451	0
C03793	N6,N6,N6-Trimethyllysine	15.2165	17.4702	14.37	8.47296	14.8634	13.5716	13.4959	11.5774	27.9684	33.0596	30.8915	18.5127	24.361	18.7023	26.0973	26.2828	13.8824	13.3771	27.6081	23.8609	3.83631	1.35401	6.41236	3.5463
C01029	N8-Acetylspermidine	3.42818	2.63567	2.02343	2.31262	5.36037	3.03886	2.90163	3.15992	27.6116	28.5627	30.3222	50.2561	16.8902	16.5275	20.125	13.1875	2.59997	3.6152	34.1882	16.6826	0.606128	1.16822	10.7707	2.83628
C01042	N-Acetylaspartate	0	0	0	0	0	0	7.29068	0	80.3175	99.3036	76.9862	104.964	272.086	489.612	367.078	271.472	0	1.82267	90.3929	350.062	0	3.64534	13.82	103.313
C00140	N-Acetylglucosamine	195.351	175.448	163.963	116.521	145.965	133.704	121.422	125.089	91.4299	125.032	96.0942	95.616	123.284	110.903	96.4948	91.1984	162.821	131.545	102.043	105.47	33.4793	10.9049	15.4683	14.5041
C04501	N-Acetylglucosamine 1-phosphate	10.5489	0	13.5656	6.24487	6.05335	0	9.13758	0	26.1327	22.2062	20.1302	54.7352	17.5671	29.5749	20.7945	78.9692	7.58984	3.79773	30.8011	36.7264	5.88446	4.56243	16.1491	28.6153
C00357	N-Acetylglucosamine 6-phosphate	0	0	0	0	0	0	0	0	43.6343	29.8829	25.3553	91.2296	0	0	0	4.90053	0	0	47.5255	1.22513	0	0	30.155	2.45027
C01239	N-Acetylglucosylamine	73.6405	99.8653	84.3256	45.4427	35.7281	36.6304	46.7253	34.4375	31.1207	22.0221	28.0207	23.0182	161.818	142.233	126.185	180.81	75.8185	38.3803	26.0454	152.761	22.9351	5.63563	4.28217	23.7058
C00624	N-Acetylglutamate	11.6122	8.3845	6.8974	6.42511	5.05688	3.65713	3.05052	0	88.9318	138.101	90.3371	442.156	56.1241	74.7021	67.6092	90.694	8.32979	2.94113	189.882	72.2824	2.34212	2.13317	169.729	14.4657
C02997	N-Acetylhistidine	41.0361	40.3247	33.9228	23.7891	24.2311	16.2075	11.569	17.6338	5.56723	4.7335	5.94171	6.27428	3.41101	4.59384	3.02394	3.12721	34.7682	17.4104	5.62918	3.539	7.98785	5.23262	0.663305	0.722015
C02710	N-Acetylleucine	10.8838	10.4746	9.52801	7.57753	10.9014	9.57356	9.33793	9.72666	32.6685	32.4947	30.5569	31.2035	35.4136	31.8608	31.9824	27.7498	9.61599	9.88489	31.7309	31.7516	1.47283	0.696281	1.01962	3.13527
C02712	N-Acetylmethionine	30.7108	34.4861	31.6383	17.0794	32.2591	41.7042	36.893	36.3739	11.0532	22.6432	14.6003	18.5565	50.4864	47.0346	51.2556	57.7432	28.4786	36.8075	16.7133	51.6299	7.76742	3.86701	5.00209	4.4698
C00270	N-Acetylneuraminate	243.861	177.18	182.587	144.799	1710.84	1392.34	1226.84	1758.91	38.0844	48.5776	32.1979	29.9476	58.8874	54.9833	57.4389	60.5283	187.107	1522.23	37.2019	57.9595	41.3521	255.421	8.32364	2.35152
C00437	N-Acetylornithine	5.56134	5.48925	4.16754	3.91243	5.53527	5.17324	4.72509	5.2917	33.8433	27.4486	31.8147	45.3632	34.3395	29.6819	22.2213	27.7133	4.78264	5.18133	34.6175	28.489	0.864348	0.33945	7.64454	5.01785
C03519	N-Acetylphenylalanine	0	0	0	0	0	0	0	0	20.7196	21.3906	19.3401	10.6417	14.4941	15.1336	13.1604	11.9477	0	0	18.023	13.6839	0	0	4.99437	1.4197
C02714	N-Acetylputrescine	5.36075	4.61207	3.01881	2.85232	3.76771	2.37929	1.89876	2.57883	38.993	45.3746	39.382	54.1511	43.2374	37.7057	37.4533	52.9903	3.96099	2.65615	44.4752	42.8467	1.22476	0.794112	7.08111	7.27011
-	N-Acetylvaline	10.8969	12.4591	9.12145	7.85027	41.927	41.0434	31.831	41.7313	25.4259	26.6824	26.058	32.1322	70.626	64.5378	56.6365	56.8826	10.0819	39.1332	27.5746	62.1707	2.01807	4.88284	3.08139	6.7252
C00003	NAD+	0	0	0	0	0	0	0	0	558.104	566.11	580.745	622.468	0	0	0	0	0	0	581.856	0	0	0	28.6512	0
C00006	NADP+	0	0	0	0	0	0	0	0	0	0	0	7.6714	0	0	0	0	0	0	1.91785	0	0	0	3.8357	0
C04259	N-alpha,N-alpha-Dimethylhistidine	1.51634	1.41993	1.35679	0.778992	0	0	0	0	1.94283	2.14997	1.30599	1.29924	0	0	0	0	1.26801	0	1.67451	0	0.332549	0	0.437682	0
C02727	N-epsilon-Acetyllysine	3.41208	4.47885	4.62543	1.86437	3.25871	3.01618	4.16753	2.94402	4.46931	5.88719	5.41097	5.2544	7.29514	6.34379	7.89895	7.69836	3.59518	3.34661	5.25547	7.30906	1.2743	0.56359	0.589154	0.690761
C01044	N-Formylaspartate	0	0	0	0	0	0	0	0	9.43103	11.9742	11.9854	10.8048	0	0	0	0	0	0	11.0489	0	0	0	1.21248	0
C03145	N-Formylmethionine	11.2173	9.25296	7.2601	6.03734	11.501	11.3353	8.90347	9.21521	61.9781	40.8445	39.1786	35.1101	38.2587	42.827	38.8221	33.7506	8.44193	10.2388	44.2778	38.4146	2.27592	1.36947	12.0435	3.71542
C00153	Nicotinamide	46.4837	27.3884	60.3781	39.2336	59.8833	8.8429	39.3207	13.2288	28.579	32.6691	48.0881	74.7914	107.61	53.564	48.7166	43.5101	43.3709	30.3189	46.0319	63.3502	13.8021	23.8633	20.9325	29.7909
C00253	Nicotinate	0	0	0	0	0	0	0	0	548.929	472.426	468.811	547.211	173.625	193.223	139.236	111.207	0	0	509.344	154.323	0	0	44.7467	36.3886
C02721	N-Methylalanine	0	0	0	0	0	0	0	0	5.83374	5.23708	5.85384	4.68163	3.66939	3.86664	5.29148	3.69729	0	0	5.40157	4.1312	0	0	0.558776	0.778413
C00455	NMN	9.74665	5.64973	11.455	1.63362	3.93847	1.1688	5.58887	0	78.2686	78.3133	79.4016	124.862	56.9178	97.6707	96.2928	188.233	7.12125	2.67404	90.2114	109.779	4.39521	2.55025	23.1064	55.6111
C00547	Noradrenaline	0	0	0	0	0	0	0	0	3.72594	1.55183	0	3.12922	0	0	0	0	0	0	2.10175	0	0	0	1.67466	0
C02571	o-Acetylcarnitine	17.3607	11.589	36.5383	21.1678	41.8811	21.6704	41.9138	20.62	3.39975	8.82934	25.4545	26.7785	21.0213	5.587	7.54066	24.3282	21.6639	31.5213	16.1155	14.6193	10.6695	11.989	11.7714	9.43288
C00979	O-Acetylserine	0	0	0	0	0	0	0	0	2.34877	3.40363	3.77674	7.09155	0	0	0	0	0	0	4.15517	0	0	0	2.04885	0
C06423	Octanoate	0	7.75606	9.31993	0	0	10.1495	11.5893	0	0	0	8.15873	0	13.1945	27.4799	14.9772	18.1794	4.269	5.43471	2.03968	18.4577	4.97059	6.30293	4.07937	6.35851
C04137	Octopine	49.0254	48.341	43.0558	23.8083	0	0	0	0	0	10.6703	8.60892	57.2867	0	0	0	0	41.0576	0	19.1415	0	11.8049	0	25.8467	0
C01005	O-Phosphoserine	0	0	0	0	0	0	0	0	0	0	0	13.3612	0	0	0	0	0	0	3.3403	0	0	0	6.68061	0
-	Ophthalmate	117.16	128.14	107.672	71.4808	18.6514	17.4063	16.7225	17.1364	65.6193	79.4756	65.6165	64.5496	14.5721	14.5702	14.3905	11.6746	106.113	17.4792	68.8152	13.8018	24.5563	0.830537	7.12474	1.42069
C00077	Ornithine	35.6058	49.0955	42.5795	27.8586	35.2346	35.8361	36.3928	31.4044	226.824	189.079	259.935	89.8571	1832.66	1372.95	1885.33	2057.01	38.7848	34.717	191.424	1786.99	9.13233	2.25843	73.6394	292.173
C00295	Orotate	0	0	0	0	68.1559	0	0	0	131.651	0	0	0	0	85.985	53.6326	0	0	17.039	32.9128	34.9044	0	34.078	65.8256	42.4131
C01118	o-Succinylhomoserine	130.582	111.154	125.61	107.91	102.677	92.2632	73.6785	99.5627	59.7503	64.5954	65.3608	77.3496	58.6393	81.2616	52.5869	59.9626	118.814	92.0454	66.764	63.1126	10.9886	12.9991	7.4815	12.5181
C00864	Pantothenate	7.15017	6.50584	6.22202	5.80333	9.41821	9.5421	14.879	8.6997	27.1902	29.8151	28.8732	22.1793	36.0023	27.5689	29.8875	37.4792	6.42034	10.6348	27.0145	32.7345	0.565682	2.85377	3.40138	4.76023
C00811	p-Coumarate	0	0	26.0912	0	0	42.613	26.8243	0	0	0	0	0	0	0	0	0	6.52279	17.3593	0	0	13.0456	21.0557	0	0
C01601	Pelargonate	24.9557	19.0738	0	15.1455	20.5467	31.0258	24.9133	17.5238	14.8302	0	0	14.984	33.8655	46.6216	24.091	41.6791	14.7938	23.5024	7.45357	36.5643	10.6546	5.86151	8.60687	9.83494
C00079	Phe	392.762	469.722	572.172	204.34	441.086	419.077	819.444	525.867	82.9656	111.211	122.169	99.9398	1484.66	782.935	709.282	495.503	409.749	551.368	104.071	868.095	155.413	184.552	16.7433	428.739
C00588	Phosphorylcholine	25.4884	13.2028	60.8305	34.5672	13.5054	0	25.1457	0	31.8215	42.8679	82.8231	109.174	43.8475	39.5661	19.1861	71.9049	33.5222	9.66277	66.6716	43.6261	20.2011	12.1274	35.8164	21.7066
C01606	Phthalate	6.24124	5.92578	4.9605	3.08487	3.65191	2.73157	2.27828	2.5902	5.22642	6.44018	4.89371	3.4135	3.84823	4.79794	3.29003	3.61585	5.0531	2.81299	4.99345	3.88801	1.42077	0.59047	1.24546	0.648383
C00156	p-Hydroxybenzoate	0	0	0	0	0	0	0	0	96.9038	108.933	84.241	79.0221	0	0	0	0	0	0	92.2749	0	0	0	13.4051	0
C00642	p-Hydroxyphenylacetate	0	0	0	0	0	0	0	0	0	0	0	0	2039.87	2323.03	2115.9	2984.56	0	0	0	2365.84	0	0	0	429.486
C02656	Pimelate	0	0	0	0	0	0	0	0	22.1531	28.3355	19.1211	13.7684	5.39517	5.29608	5.41709	3.8316	0	0	20.8445	4.98499	0	0	6.07915	0.770723
C00408	Pipecolate	1.46643	2.51698	2.99525	1.54807	1.40662	0.922747	1.32435	1.28633	61.068	75.1516	72.792	32.3347	40.8844	48.986	58.0392	36.4171	2.13168	1.23501	60.3366	46.0817	0.747746	0.214144	19.6576	9.51898
C00148	Pro	5207.59	6328.23	5703.58	1061.74	9138.72	9465.86	7709.94	8922.39	7597.72	8520.32	8204.11	5263.94	20175.5	20380.6	21492.1	19936.9	4575.28	8809.23	7396.52	20496.3	2386.82	766.152	1472.36	688.186
C10172	Proline betaine	0.809071	0	0.848526	0	0	0	0	0	1.38677	0.920194	1.05105	1.17815	0	0	0	0	0.414399	0	1.13404	0	0.478778	0	0.198691	0
C00163	Propionate	164.017	0	246.774	0	0	238.266	0	222.173	10328.7	12589.6	11955	4986.74	10022.9	16084.2	11062.5	10898.4	102.698	115.11	9965.01	12017	123.304	133.08	3452.73	2749.59
C00584	Prostaglandin E2	0	0	0	0	685.328	1021.51	688.272	835.38	1184.67	1426.54	1293.87	0	7647.85	7320.66	9915.08	1678.18	0	807.622	976.269	6640.44	0	158.869	658.318	3503.56
C00134	Putrescine(1,4-Butanediamine)	7.91582	9.54926	6.56202	8.13632	15.8078	2.55338	3.56076	3.18886	87.3407	183.326	100.649	58.2726	69.6232	27.7879	55.4017	49.2927	8.04086	6.2777	107.397	50.5264	1.22297	6.367	53.6228	17.3879
C00250	Pyridoxal	9.24131	8.58004	7.95549	4.51673	0	0	0	0	16.8721	16.7889	18.0229	16.2592	4.45087	2.59619	4.54518	4.91673	7.57339	0	16.9858	4.12724	2.10432	0	0.742761	1.04032
C00534	Pyridoxamine	0	0	0	0	0	0	0	0	9.79017	9.14468	12.5659	4.5566	2.76833	2.53119	3.88471	2.7346	0	0	9.01433	2.97971	0	0	3.32183	0.612361
C00647	Pyridoxamine 5'-phosphate	0	0	0	0	0	0	0	0	0	0	0	12.8668	0	0	0	0	0	0	3.21669	0	0	0	6.43338	0
C00314	Pyridoxine	5.96189	5.44551	4.72658	3.5282	0	0	0	0	13.4991	14.7382	14.6284	15.3788	0	0	0	1.17006	4.91555	0	14.5611	0.292515	1.05453	0	0.781528	0.58503
C00022	Pyruvate	0	0	0	0	0	0	214.597	0	0	0	0	0	0	0	0	0	0	53.6493	0	0	0	107.299	0	0
C00296	Quinate	463.354	426.943	365.096	316.83	379.114	285.687	143.802	164.341	0	0	0	0	40.5375	50.9964	56.2912	51.974	393.056	243.236	0	49.9498	65.0188	110.116	0	6.68324
C00117	R5P	0	0	0	0	0	0	0	0	0	0	0	22.1153	0	0	0	0	0	0	5.52884	0	0	0	11.0577	0
C00255	Riboflavin	0	0	0	0	0	0	0	0	55.6219	45.9926	38.15	0	0	0	27.143	0	0	0	34.9411	6.78574	0	0	24.3653	13.5715
C00199	Ru5P	0	0	0	0	0	0	0	0	19.175	19.4184	15.2552	24.5539	10.1549	0	0	19.7216	0	0	19.6006	7.46914	0	0	3.81366	9.46772
C05382	S7P	0	0	0	0	0	0	0	0	53.1915	43.3979	26.5657	75.3926	0	0	0	0	0	0	49.6369	0	0	0	20.3895	0
C00818	Saccharate	265.279	374.222	378.981	91.3476	0	0	0	0	0	0	0	0	0	0	0	0	277.457	0	0	0	134.729	0	0	0
C00449	Saccharopine	65.647	59.2457	57.834	42.9625	13.3862	8.32411	8.08671	10.0567	9.24924	8.26537	6.9212	5.6836	45.7305	8.93022	0	0	56.4223	9.96343	7.52985	13.6652	9.5956	2.44494	1.55739	21.7874
C00021	SAH	1.76829	0	1.3787	0.651686	1.62838	0.433007	1.20821	0.581318	10.0134	14.5647	3.7503	2.55962	4.60639	1.6908	2.60693	8.0043	0.94967	0.962727	7.722	4.2271	0.784192	0.556605	5.6124	2.79696
C00019	SAM+	6.20204	3.20973	3.69411	3.92237	18.8984	11.813	11.897	13.7961	48.2033	53.7298	52.3146	60.3237	38.5932	48.742	32.176	38.0765	4.25706	14.1011	53.6429	39.397	1.33026	3.3267	5.03301	6.87657
C00213	Sarcosine	6.71569	5.70536	4.11438	3.16219	6.32589	4.65813	3.32908	3.55877	7.75355	8.25589	8.08618	8.39621	6.66668	8.41273	6.1915	7.39239	4.9244	4.46797	8.12296	7.16582	1.58956	1.36769	0.276981	0.966877
-	SDMA	3.44848	3.69487	3.16394	1.92597	2.23256	3.55329	2.97002	2.2653	11.8423	13.4207	13.8783	8.14984	6.68115	6.10117	7.17265	7.71006	3.05832	2.75529	11.8228	6.91626	0.785449	0.631464	2.59933	0.686904
C08277	Sebacate	4.08586	4.28057	3.24071	1.83919	0	0	2.62418	0	2.67242	2.65838	2.6955	2.01585	0	1.9466	1.69228	3.72072	3.36158	0.656046	2.51054	1.8399	1.11077	1.31209	0.330145	1.52271
C00065	Ser	1860.08	2614.65	2644.35	702.844	3403.19	3216.65	3960.17	3748.33	297.343	417.671	462.783	739.617	1781.04	1159.64	956.279	754.621	1955.48	3582.08	479.354	1162.9	910.539	334.731	187.033	444.032
C00780	Serotonin	8.8234	6.48026	12.5012	21.9679	19.036	0	8.46928	0	20.434	22.2314	21.0501	42.2406	12.5937	14.1379	6.9309	13.0674	12.4432	6.87632	26.489	11.6825	6.81623	9.03627	10.5275	3.23289
C00482	Sinapate	0	0	0	0	0	0	0	0	235.37	261.136	283.091	328.092	0	0	0	0	0	0	276.922	0	0	0	39.2947	0
C00315	Spermidine	8.14715	8.80768	5.11829	7.57845	18.7092	5.15592	7.42574	6.55834	300.884	378.099	269.652	183.667	84.4865	75.7048	95.2269	76.3776	7.4129	9.46229	283.075	82.949	1.61009	6.23511	80.434	9.10627
C00750	Spermine	0	0	0	0	0.992983	0.75996	0	0.787729	1.31484	2.59953	1.67475	1.26706	0.789074	0.51171	0.68625	1.10691	0	0.635168	1.71404	0.773486	0	0.436011	0.617737	0.250034
C00042	Succinate	107.15	95.3921	155.265	106.567	213.493	79.7097	163.463	86.1964	164298	197902	160743	103702	17379.9	13154.7	18849.1	40141	116.094	135.716	156661	22381.2	26.6691	64.3119	39074.7	12083.4
C00898	Tartrate	0	0	0	0	8.55327	9.98755	12.6167	7.15127	0	0	0	0	50.4584	57.5766	46.5079	15.1755	0	9.57719	0	42.4296	0	2.33383	0	18.7378
C00245	Taurine	315.431	194.224	502.463	319.924	1158.39	453.409	1180.66	535.341	2135.84	2127.55	3133.58	3543.89	5142.96	4413.51	7537.31	6602.9	333.011	831.95	2735.21	5924.17	127.091	391.337	716.743	1408.94
C05122	Taurocholate	202.936	213.156	1242.7	250.014	890.448	1063.34	3033.53	1865.08	185.999	259.862	171.417	372.982	956.837	409.054	1091.24	2232.57	477.201	1713.1	247.565	1172.43	510.731	977.34	92.1402	765.88
C06337	Terephthalate	18.4063	15.968	19.6173	15.8602	16.5222	19.3796	18.8735	15.861	10.7842	16.4266	13.5874	13.0641	9.27435	14.1606	8.60669	12.174	17.463	17.6591	13.4656	11.0539	1.85605	1.72824	2.31901	2.58597
C00378	Thiamine	4.56408	4.79383	4.34051	3.29885	2.42825	2.74775	2.60794	2.41436	1.46395	1.43392	0.936419	0.812057	1.30263	1.53913	2.16065	2.74539	4.24932	2.54958	1.16159	1.93695	0.66012	0.158829	0.335889	0.649164
C01081	Thiamine monophosphate	0	0	0	0	0	0	0	0	2.36942	0	0	0	2.3937	3.26678	0	4.42865	0	0	0.592356	2.52228	0	0	1.18471	1.87678
C00188	Thr	3074.91	4474.07	3830.5	1462.52	5317.66	5044.63	4867.1	5537.5	268.396	364.378	324.58	513.044	1179.29	559.383	487.809	449.491	3210.5	5191.72	367.6	668.994	1298.05	295.766	104.653	343.234
C03618	threo-beta-methylaspartate	0	0	0	0	0	0	0	0	0	407.729	410.859	0	611.733	831.663	681.053	519.065	0	0	204.647	660.879	0	0	236.309	131.783
C01620	Threonate	369.174	322.319	275.388	196.928	649.363	550.779	512.149	523.816	623.71	702.311	564.996	588.367	568.433	701.229	533.535	508.817	290.952	559.027	619.846	578.003	73.4513	62.3594	60.0412	85.7133
C00214	Thymidine	458.127	441.246	392.521	287.338	209.611	248.831	210.322	210.911	421.475	448.487	436.885	362.994	130.456	142.725	136.807	132.919	394.808	219.919	417.46	135.727	76.8566	19.2822	37.959	5.34833
C00178	Thymine	3590.52	3643.38	3457.4	2930.25	654.708	742.982	722.229	618.488	969.561	934.498	878.517	884.748	656.368	552.794	631.442	705.728	3405.39	684.602	916.831	636.583	326.28	57.9906	43.1657	63.8216
C00371	trans-Zeatin	0	0	0	0	0	0	0	0	0	0	0	0	0	3.69105	0	0	0	0	0	0.922762	0	0	0	1.84552
C01004	Trigonelline	28.3677	22.7315	11.3104	7.98181	0	0	0	0	4.46328	5.34831	5.63394	22.4139	0	0	0	0	17.5978	0	9.46486	0	9.56285	0	8.64708	0
C00565	Trimethylamine	14.9005	12.35	20.2883	27.691	11.5313	10.347	14.0913	15.0087	46.7936	53.7466	38.876	49.8239	12.4658	11.1116	14.2998	20.5036	18.8075	12.7446	47.31	14.5952	6.78413	2.17254	6.30207	4.14994
C01104	Trimethylamine N-oxide	355.023	174.959	171.316	151.341	19.08	8.75291	7.58258	8.54168	0	0	0	0	0	0	0	0	213.16	10.9893	0	0	95.1439	5.4178	0	0
C00078	Trp	181.419	263.309	276.901	107.599	238.776	271.664	424.861	319.694	80.3283	92.2986	83.662	74.3497	242.827	121.559	93.3511	80.9897	207.307	313.749	82.6596	134.682	78.7223	81.1856	7.49229	74.0691
C00082	Tyr	478.397	658.499	671.543	260.178	807.46	778.615	1201.72	962.669	76.4629	92.4558	99.3529	117.519	1652.35	872.646	949.945	885.849	517.154	937.616	96.4476	1090.2	192.66	193.736	17.0075	376.288
C00483	Tyramine	0	0	0	0	0	0	0	0	3.93354	6.95255	4.76507	0	1.57162	0	0	0	0	0	3.91279	0.392906	0	0	2.90269	0.785812
C00015	UDP	0	0	0	0	0	0	0	0	9.45873	0	0	12.4454	0	0	0	0	0	0	5.47603	0	0	0	6.43967	0
C00029	UDP-glucose	0	0	0	6.41398	8.41453	0	0	0	41.0858	63.7531	44.8873	47.7554	0	0	0	0	1.60349	2.10363	49.3704	0	3.20699	4.20727	9.97	0
C00167	UDP-glucuronate	0	0	0	0	0	0	0	0	8.3906	12.3542	7.35844	10.4033	0	0	0	0	0	0	9.62663	0	0	0	2.21474	0
C00043	UDP-N-acetylglucosamine	0	0	4.64955	6.77889	15.2831	0	0	0	27.8822	41.5485	30.3302	79.1949	0	0	0	0	2.85711	3.82078	44.7389	0	3.41172	7.64155	23.7287	0
C00105	UMP	12.7398	0	22.9559	14.1199	8.48846	0	6.33104	0	46.2154	44.5803	35.3588	99.484	37.0662	48.3884	29.1432	77.9173	12.4539	3.70487	56.4096	48.1288	9.45601	4.36774	29.1113	21.3718
C17715	Undecanoate	0	0	8.69707	0	0	0	0	0	0	0	0	0	20.621	113.184	15.3508	7.92997	2.17427	0	0	39.2715	4.34853	0	0	49.5494
C00106	Uracil	59.1401	54.4561	60.8628	34.8028	80.2008	109.484	134.697	76.5222	50.7955	52.2564	61.5415	38.4658	102.698	76.9305	45.328	76.7781	52.3155	100.226	50.7648	75.4337	11.9848	27.306	9.48028	23.4788
C00366	Urate	204.947	221.109	251.549	151.028	134.113	164.33	168.915	120.59	0	72.6699	0	0	55.458	49.3187	36.667	45.3372	207.158	146.987	18.1675	46.6952	42.1136	23.4108	36.3349	7.87564
C00086	Urea	24798.6	20596	21854.4	13559.5	24367	19578.6	17807.3	17857.6	18455.1	19395.5	17097.5	16976.8	22741.1	26716.7	21336.6	23049.9	20202.1	19902.6	17981.2	23461.1	4765.77	3088.05	1156.78	2294.92
C00299	Uridine	442.534	326.386	328.611	231.073	1310.06	974.367	776.351	871.659	271.593	268.098	256.448	229.23	361.333	475.508	323.126	325.493	332.151	983.109	256.342	371.365	86.5002	232.481	19.1995	71.5952
C00785	Urocanate	174.137	192.543	160.731	52.292	321.226	227.04	328.389	290.154	6.87367	6.02588	7.05095	4.12645	53.5715	28.1901	18.4482	11.1505	144.926	291.702	6.01924	27.8401	63.1176	46.1925	1.3388	18.5201
C00183	Val	1037.41	1455.06	1572.16	412.5	1781.74	1777.87	2363.67	2016.98	231.282	292.36	284.49	463.267	2833.95	2206.74	2769.15	2910.47	1119.28	1985.07	317.85	2680.08	524.116	276.063	100.669	320.8
C00385	Xanthine	102.762	0	0	0	0	0	71.7353	0	0	0	0	0	56.9599	0	0	0	25.6904	17.9338	0	14.24	51.3809	35.8676	0	28.48
C01762	Xanthosine	11.994	8.87996	8.6979	7.55381	19.2283	22.6533	13.9036	18.2115	3.98595	4.75933	0	6.85799	3.93736	2.57404	3.53084	3.61592	9.28141	18.4992	3.90082	3.41454	1.90126	3.60511	2.8697	0.587047
C02470	Xanthurenate	0	0	0	0	0	0	0	0	68.4947	75.6918	51.2831	11.5899	37.6722	109.798	34.849	21.6056	0	0	51.7649	50.9811	0	0	28.6743	39.8316
C02494	1-Methyladenosine	24.4332	18.016	17.0177	16.0022	12.7885	15.7576	11.5001	14.2687	10.9335	13.6365	7.44868	20.9115	6.72215	0	5.05142	5.78624	18.8673	13.5787	13.2325	4.38995	3.8006	1.84108	5.71163	3.00544
C05127	1-Methylhistamine	0.863395	0	0.26157	0.47868	1.32224	0.490729	0.496956	0	1.32549	1.49354	1.21401	0.680914	0.422827	0.364056	0.33901	1.56251	0.400911	0.577481	1.17849	0.672101	0.365187	0.548379	0.351051	0.594645
C02918	1-Methylnicotinamide	44.728	15.5883	11.0358	18.6399	74.7073	43.8669	31.3105	37.8599	55.0949	50.7047	53.3369	66.2436	22.0687	41.5054	14.9278	21.3836	22.498	46.9362	56.345	24.9714	15.1458	19.2111	6.84122	11.4825
C00986	1,3-Diaminopropane	4.39875	4.69242	2.79209	4.86545	0	0	0	0	0	5.71943	0	0	0	0	0	0	4.18718	0	1.42986	0	0.949801	0	2.85971	0
C03722	2,3-Pyridinedicarboxylate	40.4881	15.2663	17.2141	13.4033	26.0015	14.9019	16.7789	11.141	8.87342	13.2268	10.1719	19.2388	19.6544	36.4776	14.505	15.3389	21.593	17.2058	12.8777	21.494	12.6925	6.31495	4.61668	10.2409
C03283	2,4-Diaminobutyrate	0	0	0	0	0	0	0	0	4.01344	3.68929	3.69899	3.44206	0	0	0	0	0	0	3.71094	0	0	0	0.234103	0
C00628	2,5-Dihydroxybenzoate	0	0	0	0	0	0	0	0	33.8796	47.5807	36.6167	0	0	0	0	0	0	0	29.5192	0	0	0	20.5506	0
C02356	2AB	4.29115	4.93656	5.02308	6.12818	15.4317	7.02675	10.5633	7.94358	61.9566	55.4102	80.7538	95.1648	147.767	130.905	219.049	166.427	5.09474	10.2413	73.3213	166.037	0.762434	3.77082	18.0956	38.2032
C01987	2-Aminophenol	0	0	0	0	0	0	0	0	4.71743	4.19664	4.79694	4.42592	0	0	0	0	0	0	4.53423	0	0	0	0.275846	0
C00881	2'-Deoxycytidine	109.388	105.766	80.3887	74.2707	147.752	161.563	123.12	153.51	11.0458	9.5083	7.50897	6.94822	2.09908	2.74905	3.51774	3.07788	92.4534	146.487	8.75283	2.86094	17.7029	16.5753	1.88258	0.597603
C06369	2-Deoxyglucose 6-phosphate	0	0	0	0	0	0	0	0	64.4849	51.3068	43.9735	128.193	0	0	0	0	0	0	71.9896	0	0	0	38.4181	0
C00330	2'-Deoxyguanosine	233.251	198.405	163.885	150.864	246.246	304.24	228.031	264.857	38.8327	29.1193	0	33.4724	27.563	17.9295	0	15.5343	186.601	260.844	25.3561	15.2567	37.0078	32.6044	17.3646	11.4227
C05512	2'-Deoxyinosine	485.809	428.599	405.377	275.339	611.462	747.034	502.18	561.506	0	0	0	0	0	0	0	0	398.781	605.546	0	0	88.9652	104.368	0	0
C10898	2-Guanidinobenzimidazole	0	0	0	0	1.43229	1.58155	1.1558	1.59051	0	0	0	0	3.9231	4.17585	2.73024	2.02095	0	1.44004	0	3.21254	0	0.202912	0	1.01413
C03264	2-Hydroxy-4-methylpentanoate	0	0	0	0	0	0	0	0	43.7735	30.3701	16.0794	35.5536	55.128	56.9994	48.6959	50.0229	0	0	31.4441	52.7115	0	0	11.6352	3.98243
C05984	2-Hydroxybutyrate	0	0	0	0	23.0727	23.2801	24.824	18.8225	41.3597	62.3602	50.377	54.2519	30.9634	35.276	26.5389	25.9358	0	22.4998	52.0872	29.6785	0	2.57301	8.72206	4.3531
C02630	2-Hydroxyglutarate	9.79541	11.5258	12.7484	14.5118	6.40639	0	14.2686	0	107.578	164.767	69.2451	71.1831	25.116	32.3014	27.611	36.1282	12.1453	5.16875	103.193	30.2892	1.98913	6.7767	44.6754	4.90162
-	2-Hydroxyisobutyrate	0	0	0	0	0	0	0	0	0	0	0	0	22.8996	22.2149	23.2566	0	0	0	0	17.0928	0	0	0	11.4034
-	2-Hydroxypentanoate	0	0	0	0	0	0	0	0	192.493	228.182	187.691	382.574	80.0646	109.822	94.6244	51.9313	0	0	247.735	84.1105	0	0	91.6893	24.6541
C02504	2-Isopropylmalate	0	0	0	0	0	0	0	0	114.106	186.143	110.559	120.189	4.1205	1.48703	3.1404	4.47128	0	0	132.749	3.3048	0	0	35.8175	1.33633
C00141	2-Oxoisopentanoate	0	15.0156	0	0	0	0	0	0	0	0	0	0	0	0	0	15.7771	3.7539	0	0	3.94427	7.5078	0	0	7.88854
C06057	3-Aminopropane-1,2-diol	0	0	0	0	0	0	0	0	75.6401	81.4216	78.8769	66.6284	70.426	72.0897	72.7444	62.9087	0	0	75.6418	69.5422	0	0	6.45788	4.52875
C03761	3-Hydroxy-3-methylglutarate	0	0	0	0	0	0	0	0	845.535	1201.09	742.586	536.504	0	0	0	0	0	0	831.428	0	0	0	277.92	0
C01089	3-Hydroxybutyrate	76.0908	82.6911	138.203	87.7044	283.639	591.379	536.496	403.187	370.68	502.028	383.948	1691.49	1705.04	1393.58	1270.93	1050.95	96.1723	453.675	737.037	1355.12	28.4211	138.182	639.038	272.964
-	3-Indoxyl sulfate	0	0	0	0	0	0	0	0	0	0	0	0	8.75072	34.8962	0	5.27981	0	0	0	12.2317	0	0	0	15.5321
C08262	3-Methylbutanoate	0	0	33.5476	0	0	26.9411	33.8082	28.9123	0	0	0	0	572.699	770.719	518.681	658.158	8.38689	22.4154	0	630.064	16.7738	15.2199	0	109.955
C01152	3-Methylhistidine	9.96518	13.4493	12.437	6.82649	3.24627	2.07978	3.27782	2.7353	23.1644	29.2532	25.0909	18.7576	3.1753	2.58688	2.71455	2.67466	10.6695	2.83479	24.0665	2.78785	2.95048	0.561407	4.35699	0.263751
C05135	4-(beta-Acetylaminoethyl)imidazole	0	0	0	0	0	0	0	0	8.17397	10.7846	7.97186	3.19486	1.03669	1.1236	1.07936	2.27538	0	0	7.53132	1.37876	0	0	3.16205	0.5988
C02129	4-Acetylbutyrate	17.8076	0	15.6542	0	13.1643	14.9556	16.0797	10.3291	15.1152	15.9237	14.8033	9.45241	14.5742	16.0664	12.3328	13.5686	8.36546	13.6322	13.8237	14.1355	9.69952	2.50806	2.95216	1.58032
C03678	4-Amino-3-hydroxybutyrate	0	0	0	0	0	0	0	0	1.23662	0	2.03326	0	0	0	0.876671	0	0	0	0.817471	0.219168	0	0	0.998391	0.438336
C11527	4-Hydroxymandelate	0	0	0	0	0	0	0	0	91.6784	103.352	66.8702	0	0	0	0	0	0	0	65.4751	0	0	0	46.2248	0
C05562	4-Hydroxymethylimidazole	0	0	0	0	0	0	0	0	0	2.61889	0	1.66321	3.1787	3.93778	0	2.44056	0	0	1.07052	2.38926	0	0	1.29624	1.7061
C00233	4-Methyl-2-oxopentanoate	12.3567	17.724	20.2043	0	13.0611	15.6857	22.838	17.5763	0	0	0	0	54.9646	32.6442	22.7231	26.3756	12.5713	17.2903	0	34.1769	8.99809	4.13599	0	14.4514
C04294	4-Methyl-5-thiazoleethanol	0	0	0	0	0	0	0	0	0	0	0	0	1.50158	1.50389	1.27109	0	0	0	0	1.06914	0	0	0	0.721077
C00847	4-Pyridoxate	8.90172	6.54227	8.34351	2.81895	5.81193	5.0695	4.21622	3.20966	24.177	29.1403	23.2227	15.7578	6.9942	11.1503	5.81901	3.70861	6.65161	4.57683	23.0745	6.91804	2.74632	1.12062	5.52463	3.1319
C00430	5-Aminolevulinate	2.08747	3.01051	3.11866	2.83828	3.32593	2.60399	2.57433	3.25927	15.4708	12.9887	13.8004	8.89041	4.59104	5.30961	5.64799	6.13859	2.76373	2.94088	12.7876	5.42181	0.465388	0.407221	2.79606	0.650049
C00431	5-Aminovalerate	34.2437	33.5193	38.125	14.6457	30.5968	29.7551	25.7006	37.7348	138.436	200.758	152.624	7.91317	361.359	294.049	316.894	336.2	30.1334	30.9468	124.933	327.126	10.5213	5.00474	82.4464	28.5948
C05635	5-Hydroxyindoleacetate	91.9105	100.37	80.9121	55.4662	29.5853	0	22.5358	0	752.487	823.651	804.182	644.535	22.382	0	0	24.5715	82.1647	13.0303	756.214	11.7384	19.5004	15.3188	80.2804	13.5837
C16741	5-Hydroxylysine	8.89259	12.7858	10.9738	6.82206	3.65659	3.52951	3.33683	3.55264	13.017	18.444	15.373	10.1569	7.16719	5.5746	6.48784	5.45468	9.86856	3.51889	14.2477	6.17108	2.57976	0.133363	3.5178	0.808621
C03592	5-Methyl-2'-deoxycytidine	20.1974	19.2259	16.1553	13.7487	8.19297	11.1653	7.61034	8.67966	0	0	0	0	0	0	0	0	17.3318	8.91206	0	0	2.94516	1.56446	0	0
C00440	5-Methyltetrahydrofolate	0	0	0	0	0	0	0	0	55.0125	45.2107	43.1916	26.0213	0	0	0	0	0	0	42.359	0	0	0	12.0535	0
C00170	5-Methylthioadenosine	4.52509	2.94127	3.81298	2.31828	14.0934	12.3287	9.91734	11.8323	14.1469	12.5356	16.8395	25.8379	17.283	33.5135	11.5405	18.8385	3.3994	12.0429	17.34	20.2939	0.969007	1.71743	5.93698	9.35528
C01879	5-Oxoproline	91.1388	130.33	161.242	46.0891	80.7367	77.6992	68.7411	80.9245	39.5438	47.6028	31.511	65.5619	43.6054	52.019	30.4148	29.1534	107.2	77.0254	46.0549	38.7981	49.8265	5.71725	14.5698	10.9727
C02378	6-Aminohexanoate	9.5194	10.1967	8.57469	4.60737	35.3017	37.0084	29.9946	39.3921	21.4542	22.1355	20.2644	6.8978	96.4683	91.8274	88.5424	71.7124	8.22453	35.4242	17.688	87.1376	2.5015	3.98958	7.23488	10.7853
C02953	7,8-Dihydrobiopterin	15.602	11.088	10.4487	7.18994	19.0205	13.5753	11.0778	12.9428	19.0737	18.2077	21.8431	20.3767	28.8162	52.3997	26.7274	18.2162	11.0822	14.1541	19.8753	31.5399	3.46313	3.41311	1.5861	14.6428
C02242	7-Methylguanine	21.6572	15.6638	16.3843	14.763	15.4922	14.1773	10.627	12.2113	26.2977	24.1789	26.3849	26.9527	16.398	18.8051	14.2341	17.5261	17.1171	13.127	25.9536	16.7408	3.09858	2.14367	1.21822	1.939
# MasterHands Ver.2.19.0.2, Engine Ver.1.50

## Sheet: Table S5
Supplementary Table 5: Cecum metabolome of specific-pathogen-free (SPF) mice.
Concentrations of metabolites detected by CE-TOFMS in cecal contents of specific-pathogen-free (SPF) mice fed all diets: fiber-rich 1 (FR1), fiber-rich 2 (FR2), inulin-supplemented (IN), fiber-supplemented (FS) or fiber-free (FF).
	N.D.	Not detected
	Concentration	>500µM
	S/N	>10.0
[nmol/g (Cecal contents of mice)]
KEGG ID	COMPOUND	Cecal content																				Average					S.D.
		Fiber-rich 1				Fiber-rich 2				Inulin-supplemented				Fiber-supplemented				Fiber-free
		CC 560 (FR11)	CC 561 (FR12)	CC 562 (FR13)	CC 563 (FR14)	CC FR2 4	CC FR2 5	CC FR2 6	CC FR2 8	CC In1	CC In3	CC In4	CC In6	CC FS 1	CC FS 2	CC FS 5	CC FS 7	CC 566 (FF1)	CC 567 (FF2)	CC 568 (FF3)	CC 569 (FF4) *outlier*	Cecum					Cecum
		nmol/g	nmol/g	nmol/g	nmol/g	nmol/g	nmol/g	nmol/g	nmol/g	nmol/g	nmol/g	nmol/g	nmol/g	nmol/g	nmol/g	nmol/g	nmol/g	nmol/g	nmol/g	nmol/g	nmol/g	FR1	FR2	IN	FS	FF	FR1	FR2	IN	FS	FF
C00147	Adenine	50.3225	42.3129	55.8687	37.72	30.21	39.787	35.7401	28.0056	49.7163	22.3711	886.515	70.0013	67.4711	25.6906	24.0764	95.949	147.461	47.7047	41.3375	16.9723	46.556	33.4357	257.151	53.2968	78.8342	8.1033	5.33982	420.03	34.8141	59.5173
C03626	ADMA	26.5866	39.1938	34.6218	46.4881	38.2713	45.3249	30.2424	54.4731	17.325	11.1965	24.5582	58.6696	7.71099	15.3724	12.3532	9.2747	10.3235	11.5078	11.4208	0	36.7226	42.0779	27.9373	11.1778	11.084	8.33912	10.3078	21.2035	3.39689	0.660046
C00041	Ala	63521.4	83964	101304	76060.3	87924.3	82203.1	69024.7	125826	88451.2	74896.4	89671.7	81589.7	40777.5	45241.3	43841.9	34721.1	48258.1	42168.3	44745.8	2761.54	81212.4	91244.4	83652.3	41145.4	45057.4	15819.4	24374.4	6835.75	4670.98	3056.82
C00993	Ala-Ala	32.692	9.7235	27.2552	44.7867	51.6356	44.9145	53.9041	91.8025	39.537	34.4104	57.7089	44.0248	44.1695	32.7312	13.8619	19.839	60.5507	61.7512	60.5541	92.1776	28.6143	60.5642	43.9203	27.6504	60.952	14.5703	21.1725	9.99644	13.5381	0.692128
C00956	alpha-Aminoadipate	24.4441	14.892	16.3103	21.3352	14.3823	22.2386	25.2321	21.4329	17.4893	10.1609	20.8026	15.2237	9.76535	12.0129	8.76359	8.21547	10.365	13.2436	16.2244	0	19.2454	20.8215	15.9191	9.68931	13.2777	4.43326	4.59344	4.47045	1.67668	2.92981
C00020	AMP	0	0	0	0	0	0	0	0	0	0	0	0	0	0	0	0	0	0	0	53.8962	0	0	0	0	0	0	0	0	0	0
C01262	Anserine	0	0	0	0	1.65598	2.18817	2.14116	0	0	0	0	0	0	0	0	0	0	0	0	0	0	1.49633	0	0	0	0	1.02615	0	0	0
C00062	Arg	6627.66	606.982	1478.17	4707.37	1048.24	1051.05	1776.78	596.445	926.409	1314.82	735.282	247.915	168.122	163.009	119.696	73.3946	59.9979	105.544	101.571	689.193	3355.04	1118.13	806.106	131.055	89.0379	2805.55	488.317	443.417	44.154	25.2276
C03406	Argininosuccinate	0	0	0	33.7618	0	41.2143	0	0	32.1524	45.9784	0	0	0	0	36.0652	0	0	0	0	0	8.44044	10.3036	19.5327	9.01629	0	16.8809	20.6072	23.25	18.0326	0
C00152	Asn	5015.41	9694.06	1124.65	1334.81	2477.59	4848.17	4964.15	700.888	1455.61	971.083	5647.03	3393.73	7342.01	8202.85	11388.5	4343.55	6963.24	6527.12	6516.12	281.841	4292.23	3247.7	2866.86	7819.22	6668.83	4020.06	2048.33	2128.58	2897.97	255.031
C00049	Asp	29922	42256.3	22118.4	24487.6	20795.4	25930.4	25636.9	15980.1	20029.7	23877.8	31204.5	35499.8	22197.6	27957	21961.6	17408.3	19232.6	15161.4	11191.8	1847.04	29696.1	22085.7	27653	22381.1	15195.3	8988.15	4702.31	6989.36	4321.6	4020.53
C08261	Azelate	194.43	167.276	251.635	212.382	154.943	97.9825	67.3266	90.4985	25.2486	21.4384	14.8727	26.4652	46.7637	35.5891	39.0892	30.372	43.7626	51.181	44.1574	21.9536	206.431	102.688	22.0062	37.9535	46.367	35.3832	37.2009	5.21549	6.87942	4.17369
C00099	beta-Ala	243.463	222.196	245.55	287.389	332.328	274.189	280.225	353.684	330.672	167.245	241.932	244.165	58.8841	65.5895	40.2101	37.9258	84.0637	55.0627	92.7965	24.4759	249.649	310.106	246.003	50.6524	77.3076	27.2828	39.0547	66.812	13.6856	19.7533
C00719	Betaine	221.98	114.474	248.967	362.334	34.7522	90.9724	67.524	89.7916	86.9657	17.9455	46.4463	122.076	30.9328	80.9233	28.3941	31.8096	36.8939	35.1456	88.9934	41.1784	236.939	70.76	68.3584	43.0149	53.6776	101.8	26.3171	45.656	25.3137	30.5969
C00576	Betaine aldehyde	0	217.68	0	0	0	190.557	0	0	0	0	0	259.06	0	204.967	0	0	236.018	229.579	0	0	54.4199	47.6393	64.7649	51.2419	155.199	108.84	95.2786	129.53	102.484	134.445
C00246	Butyrate	50704.4	58415	31493.8	58663.8	56526.4	39881.4	47333.4	44507.5	30671	49928.7	34748.5	19159.4	21835.7	29365.3	29129.1	18922.2	20794.2	14415.5	24960	13578.5	49819.3	47062.2	33626.9	24813.1	20056.6	12763.5	7017.48	12715.5	5257.28	5310.84
C01672	Cadaverine	7.76041	0	9.84907	9.52193	13.0567	12.4984	17.2656	23.1828	0	5.10423	5.74927	3.47708	0	0	24.5934	0	4.59181	0	0	0	6.78285	16.5009	3.58265	6.14836	1.5306	4.614	4.93679	2.57268	12.2967	2.65108
C00438	Carbamoylaspartate	115.108	386.618	263.079	318.016	375.158	454.263	229.773	616.767	331.315	475.985	310.641	916.552	258.594	151.374	67.6915	132.183	347.848	200.192	0	0	270.705	418.99	508.623	152.461	182.68	115.387	161.332	281.725	79.2935	174.584
C00318	Carnitine	119.371	108.325	127.14	152.087	20.1575	116.167	50.6814	91.3839	73.929	26.338	50.1065	177.739	62.6467	129.018	55.3519	47.3723	40.0561	66.9505	106.684	44.0157	126.731	69.5975	82.028	73.5973	71.2302	18.5835	42.6048	66.6995	37.4701	33.5195
C00695	Cholate	2444.05	1972.93	2068.44	1844.67	2169.36	1788.73	1751.84	1578.06	2854.75	4486.66	7257.9	7057.49	6811.78	3305.11	13118.8	3605.16	9824.29	6461.77	15371.7	4313.96	2082.52	1822	5414.2	6710.21	10552.6	257.865	249.13	2122.16	4557.63	4499.37
C00114	Choline	2153.33	2245.35	2619.67	3661.76	701.739	2310.96	1659.32	1293.42	1063.07	1204.38	1763.41	4161.88	1810.71	2195.11	1572.16	690.721	1035.77	1903.83	1613.66	776.987	2670.03	1491.36	2048.19	1567.17	1517.75	691.23	673.952	1441.21	638.177	441.904
C00417	cis-Aconitate	8.56278	0	17.6189	10.717	4.25606	7.80505	4.67038	6.42221	0	0	0	0	0	9.91232	0	0	0	0	0	0	9.22466	5.78843	0	2.47808	0	7.26228	1.63978	0	4.95616	0
C02226	Citraconate	3.74878	4.91069	0	2.15947	7.21296	3.62039	4.691	6.17951	5.76643	3.68753	0	0	0	0	6.32154	0	6.18251	6.24942	0	0	2.70474	5.42597	2.36349	1.58039	4.14398	2.12675	1.58761	2.85805	3.16077	3.58894
C02614	Citramalate	25.8339	17.4606	64.6554	66.0134	87.1641	92.3898	72.0666	141.208	23.6069	34.7582	11.2529	10.8076	0	0	5.15036	3.57748	13.968	0	0	0	43.4908	98.2071	20.1064	2.18196	4.656	25.4594	29.9342	11.4277	2.60005	8.06443
C00158	Citrate	271.711	86.2873	456.645	377.674	213.615	273.531	239.262	380.212	32.3747	26.4985	23.9001	60.4447	26.3399	240.56	11.0672	5.96825	24.5209	10.1726	0	40.2832	298.079	276.655	35.8045	70.9839	11.5645	160.239	73.2716	16.805	113.382	12.3196
C00327	Citrulline	8451.78	23096.7	11440.9	9827.2	14571	13382.8	9459.13	11495.6	8417.85	6972.51	11745.9	15972.9	8049.96	12898.9	11317.1	8690.39	7910.34	9237.05	7613.52	362.174	13204.1	12227.1	10777.3	10239.1	8253.64	6707.22	2238.04	3998.99	2267.7	864.498
C00055	CMP	7.44546	0	0	0	0	0	0	0	7.43567	12.945	17.2679	47.9264	33.5009	20.9244	0	0	3.90444	0	0	14.2025	1.86136	0	21.3937	13.6063	1.30148	3.72273	0	18.1403	16.5289	2.25423
C00128	CMP-N-acetylneuraminate	0	0	0	0	0	0	0	0	0	0	0	0	0	13.1495	0	0	0	0	0	24.1269	0	0	0	3.28739	0	0	0	0	6.57477	0
C00300	Creatine	765.996	583.991	880.159	1220.03	89.7887	830.537	454.812	290.665	673.896	222.962	550.386	1737.99	564.66	1603.73	1033.68	264.788	337.173	623.574	1469.67	1013.23	862.544	416.45	796.31	866.715	810.141	267.718	313.831	655.988	584.416	588.851
C00791	Creatinine	131.19	23.6497	51.1052	57.7436	47.6612	119.617	84.8671	140.212	40.6561	13.5096	27.6241	45.465	17.8132	22.5011	234.381	40.4111	23.3513	62.8777	56.0573	5.59136	65.9222	98.0893	31.8137	78.7766	47.4288	45.9468	40.643	14.3427	104.192	21.1287
C00571	Cyclohexylamine	0	0	0	0	0	0	0	0	0	0	0	0	0	0	0	0	0	9.93563	0	0	0	0	0	0	3.31188	0	0	0	0	5.73634
C00506	Cysteate	32.8701	42.8494	41.1277	41.977	72.3111	57.8186	47.3641	68.5849	23.3682	19.1455	23.8066	35.7509	25.5936	31.6753	100.648	62.8866	36.0288	43.0275	33.5036	24.0739	39.706	61.5197	25.5178	55.2008	37.52	4.61115	11.2613	7.13843	34.4216	4.93393
C05824	Cysteine S-sulfate	279.015	204.877	159.395	157.643	116.517	145.83	142.057	55.5451	263.893	184.821	432.597	640.839	746.481	594.351	4717.35	2933.86	480.765	1148.4	1122.25	176.602	200.233	114.987	380.538	2248.01	917.137	56.8912	41.7124	201.972	1962.76	378.136
C00491	Cystine	39.907	135.484	53.4484	39.9223	44.4493	75.2075	48.6451	33.9609	482.604	275.031	365.524	507.997	369.474	434.885	187.511	208.201	211.955	116.074	264.319	34.2331	67.1903	50.5657	407.789	300.018	197.449	45.9736	17.5503	108.089	121.245	75.1796
C00475	Cytidine	101.381	52.5672	53.406	41.553	54.4615	54.5847	45.3508	28.0987	77.2376	42.7618	77.6981	161.887	264.214	167.077	98.1644	93.922	84.9144	123.036	91.5052	12.563	62.2269	45.6239	89.8961	155.844	99.8186	26.6558	12.458	50.7061	79.6483	20.3753
C00380	Cytosine	443.671	209.956	231.718	266.757	95.2025	207.942	85.8287	34.9583	52.5713	33.2683	101.215	197.428	172.191	367.94	472.312	423.854	145.675	513.611	320.141	0	288.025	105.983	96.1207	359.074	326.476	106.369	72.9442	73.3396	131.686	184.05
C00360	dAMP	0	0	0	0	0	0	0	0	0	0	0	7.488	5.57786	5.47916	0	0	0	0	0	0	0	0	1.872	2.76426	0	0	0	3.744	3.19214	0
C04483	DCA	577.825	835.418	851.364	545.72	1366.21	805.398	553.714	663.712	569.008	1114.62	1912.73	1439.97	3798.31	2491.83	4397.22	3841.22	3252.76	3841.5	2138.14	2041.96	702.582	847.26	1259.08	3632.14	3077.47	163.25	360.983	564.815	807.669	865.103
C00239	dCMP	0	0	0	0	0	0	0	0	21.5537	18.2458	0	47.4703	39.163	31.6804	0	0	0	0	0	0	0	0	21.8175	17.7108	0	0	0	19.5525	20.6776	0
C01571	Decanoate	14.4487	15.0182	0	0	0	27.8298	15.2951	9.87414	29.3816	15.2255	15.384	21.2622	65.6404	37.3571	14.908	10.1524	21.9239	0	30.3919	54.024	7.36673	13.2498	20.3133	32.0145	17.4386	8.50954	11.6004	6.66631	25.3629	15.6846
C06772	Diethanolamine	33.3222	44.6473	25.376	14.4004	9.38864	14.561	22.2548	27.3331	7.0927	39.8377	19.8989	8.66663	4.32441	14.2508	11.0175	29.749	15.1979	27.511	33.8178	10.1528	29.4365	18.3844	18.874	14.8354	25.5089	12.7676	7.97081	15.0944	10.7675	9.47003
C02273	Digalacturonate	15.0746	22.227	17.735	19.0699	14.9178	44.8016	36.4814	10.771	16.6549	0	0	0	39.4483	60.6953	136.813	20.1574	0	0	0	0	18.5266	26.743	4.16373	64.2785	0	2.97381	16.4913	8.32746	51.112	0
C00337	Dihydroorotate	83.6303	89.5945	164.551	233.401	144.699	197.494	219.486	324.469	286.265	276.439	133.881	270.42	77.685	0	0	0	142.104	119.258	0	0	142.794	221.537	241.751	19.4212	87.1209	70.7424	75.4573	72.2095	38.8425	76.3087
C02678	Dodecanedioate	104.503	99.4215	144.449	120.352	107.832	107.89	112.624	124.845	5.85473	5.01535	5.31575	5.69019	6.80877	5.15614	5.17066	4.08797	9.59286	6.85103	7.08068	4.4677	117.182	113.298	5.469	5.30588	7.84152	20.2463	8.01921	0.377268	1.1229	1.52105
C02679	Dodecanoate	56.1436	86.0496	0	0	33.7331	0	0	0	59.6069	64.0899	0	70.5261	208.247	65.795	102.132	114.618	105.823	138.158	204.599	181.649	35.5483	8.43328	48.5557	122.698	149.527	42.8249	16.8666	32.6792	60.6763	50.3601
C00355	DOPA	1119.64	1013	666.155	550.383	0	0	0	0	0	0	0	0	0	0	0	0	0	0	0	0	837.295	0	0	0	0	272.151	0	0	0	0
C00364	dTMP	11.1616	0	0	0	0	0	0	0	20.7995	12.813	6.49236	51.2911	26.9213	15.1391	0	0	6.94598	0	0	14.2242	2.79039	0	22.849	10.5151	2.31533	5.58078	0	19.8445	13.0599	4.01027
C00085	F6P	13.5891	16.0121	17.2256	27.4289	12.9436	10.7959	12.7804	15.2192	35.2383	0	0	12.0877	0	0	0	0	0	0	0	0	18.5639	12.9348	11.8315	0	0	6.10026	1.80899	16.6123	0	0
C00016	FAD	0	0	19.7732	24.9204	0	15.7302	16.2572	31.9473	0	17.8505	0	0	0	0	0	0	10.9689	0	0	18.6025	11.1734	15.9837	4.46263	0	3.65629	13.0719	13.0442	8.92527	0	6.33289
C00122	Fumarate	399.955	341.577	342.375	271.557	627.186	606.199	289.788	370.995	547.474	352.569	558.942	715.053	205.719	326.839	79.2308	263.191	292.223	82.5158	94.151	18.4362	338.866	473.542	543.51	218.745	156.297	52.5421	168.806	148.48	105.346	117.86
C00103	G1P	50.0074	0	38.3468	72.8443	0	18.5339	17.3997	22.8836	41.9895	25.0743	0	13.2226	4.55281	0	0	0	0	0	0	0	40.2996	14.7043	20.0716	1.1382	0	30.4481	10.0838	17.8437	2.27641	0
C00092	G6P	39.738	0	67.3927	120.988	0	29.9406	42.6874	34.7941	168.177	86.1806	38.1997	58.1246	15.9043	13.8485	0	0	0	0	0	0	57.0296	26.8555	87.6704	7.43819	0	50.8245	18.6584	57.1658	8.62979	0
C00334	GABA	95.8429	156.438	200.818	285.801	111.248	750.422	162.782	245.844	214.308	98.0935	193.501	1143.33	31.5137	220.641	71.8946	107.983	57.7262	80.3087	46.8066	29.0445	184.725	317.574	412.307	108.008	61.6139	79.9491	293.844	489.966	81.3262	17.086
C01181	gamma-Butyrobetaine	207.853	244.618	273.224	244.809	169.541	174.933	148.247	189.474	129.516	178.815	144.864	233.388	169.394	177.296	130.9	105.496	233.873	183.047	279.956	111.102	242.626	170.549	171.646	145.771	232.292	26.7962	17.0856	46.0276	33.6406	48.4739
C01035	gamma-Guanidinobutyrate	48.0085	55.6774	12.848	25.7973	24.908	28.0318	13.4695	15.6781	16.6259	15.2222	11.9641	9.78511	19.1972	15.2414	27.3107	15.2785	24.2655	16.7711	16.036	12.1011	35.5828	20.5218	13.3993	19.257	19.0242	19.7553	7.04355	3.1014	5.68093	4.55394
C00064	Gln	292.099	2274.58	328.663	251.061	1250.76	1232.37	474.652	329.451	3373.71	259.407	8321.51	2087.18	6027.47	7665.06	7829.53	5451.48	2516.61	5157.18	6850.27	559.108	786.601	821.809	3510.45	6743.38	4841.35	992.492	488.364	3452.53	1184.73	2184.02
C00025	Glu	58045.9	63278.3	70828.3	52516.2	58616.1	59983.8	53942.3	65348.9	62970.6	73206.5	77871.5	63552.4	48021.2	45525.3	43809.5	34527.1	50669.9	42262.1	36960.2	10023	61167.1	59472.8	69400.3	42970.8	43297.4	7796.92	4694.35	7343.65	5888.74	6913.27
C00257	Gluconate	291.884	252.782	301.791	1697.92	0	0	0	0	0	0	0	0	0	0	0	0	0	0	0	0	636.095	0	0	0	0	708.202	0	0	0	0
C00329	Glucosamine	2553.36	1525.21	4341.46	2522.52	1207.47	1100.42	2675.77	1906.12	1558.37	3161.63	2323.9	1995.46	146.48	1545.79	158.972	82.261	333.722	192.849	262.757	93.6198	2735.64	1722.44	2259.84	483.375	263.109	1172.24	729.081	678.06	709.071	70.4374
C00191	Glucuronate	1744.6	914.523	1304.56	1770.6	748.276	830.209	943.608	908.985	261.435	120.631	260.708	286.799	268.911	102.331	552.75	296.683	122.688	114.267	235.784	34.8041	1433.57	857.77	232.393	305.169	157.579	406.769	87.0625	75.4891	186.034	67.8577
C01425	Glu-Glu	153.194	15.8253	89.3821	210.192	75.9584	49.8398	107.366	110.376	66.9382	162.941	100.134	77.5414	130.729	53.9682	13.9024	9.23339	29.9117	42.6997	34.8901	0	117.148	85.8852	101.889	51.9581	35.8338	83.6536	28.6302	42.9915	56.2212	6.44601
C00489	Glutarate	528.216	423.368	268.176	343.984	379.252	347.485	327.164	454.246	297.742	231.263	201.606	223.004	81.2698	159.568	403.98	133.352	281.557	347.81	214.555	136.261	390.936	377.037	238.404	194.543	281.307	111.314	55.758	41.486	143.367	66.6276
C00037	Gly	19181.4	42847.8	28296.6	20634.5	28146.6	30578.8	19378	28523.8	22862.9	21321.9	26821.5	33091.8	13995.1	20307.7	23109.8	16520	15668.2	11514.1	10757.4	1027.79	27740.1	26656.8	26024.5	18483.2	12646.6	10836.5	4968.87	5250.16	4030.36	2644.01
C00258	Glycerate	1626.69	2009.2	1917.87	1425.11	1027.98	1306.59	1001.67	1296.04	1472.71	1399.09	2043.3	1748.59	816.524	912.247	734.823	678.927	839.921	706.111	500.372	551.728	1744.72	1158.07	1665.92	785.63	682.135	268.334	165.809	293.133	101.576	171.039
C00093	Glycerophosphate	75.1923	30.4717	84.0597	154.359	29.5343	55.2454	43.831	71.8028	101.481	43.8912	29.2205	65.9861	115.094	26.3395	0	0	0	0	0	65.0652	86.0207	50.1034	60.1446	35.3583	0	51.241	17.8861	31.4286	54.5879	0
C00670	Glycerophosphorylcholine	0	0	0	0	0	0	0	0	0	0	0	0	0	0	0	0	0	0	0	197.067	0	0	0	0	0	0	0	0	0	0
C01921	Glycocholate	0	10.205	8.35555	0	0	0	0	0	12.8145	18.176	41.53	59.0616	15.2999	0	26.1841	0	35.158	18.2299	36.1316	0	4.64014	0	32.8955	10.371	29.8398	5.41091	0	21.4409	12.7732	10.0663
C00160	Glycolate	1138.3	1494.17	1221.56	1271.9	1013.29	849.925	901.629	1208.2	951.414	1116.71	880.348	1042.06	958.265	967.266	967.248	937.304	802.503	690.234	685.511	605.008	1281.48	993.261	997.631	957.521	726.083	152.118	158.686	103.351	14.1289	66.2242
C02037	Gly-Gly	408.633	199.673	310.251	383.635	362.835	298.017	295.801	393.096	451.193	338.788	405.622	465.595	232.079	307.592	83.335	136.648	245.697	252.905	242.322	10.9257	325.548	337.437	415.3	189.914	246.975	93.7296	48.4095	57.0546	99.7033	5.40616
C02155	Gly-Leu	1375.41	428.62	810.359	1338.99	1269.35	772.427	1140.05	1456.05	1730.02	1507.25	2302.29	2086.51	1172.86	926.007	237.865	378.697	1184.72	1501.65	1492.34	102.67	988.346	1159.47	1906.52	678.858	1392.91	453.779	288.798	355.716	443.357	180.351
C00144	GMP	0	0	0	0	0	0	0	0	0	0	0	15.3662	7.06194	0	0	0	0	0	0	0	0	0	3.84156	1.76548	0	0	0	7.68312	3.53097	0
C00581	Guanidinoacetate	0	6.08384	6.36521	5.93676	4.72615	7.38042	0	8.99079	0	0	0	8.08025	0	5.36477	0	4.62444	0	0	0	0	4.59645	5.27434	2.02006	2.4973	0	3.06945	3.93136	4.04012	2.89943	0
C00242	Guanine	305.591	242.543	117.048	78.7784	1385.87	367.783	301.442	137.414	65.0887	332.336	462.001	281.018	771.156	296.397	2931.48	1158.89	546.891	1132.45	1926.97	6.83504	185.99	548.127	285.111	1289.48	1202.1	106.066	566.826	165.274	1150.09	692.67
C00387	Guanosine	36.8697	22.0919	17.9342	16.8114	78.2503	31.8691	28.4964	19.6423	29.7904	87.6276	20.6645	72.723	44.6302	37.5535	19.5171	20.3347	29.8123	46.7136	42.9101	43.5216	23.4268	39.5645	52.7014	30.5089	39.812	9.24528	26.3009	32.5165	12.5615	8.86635
C17714	Heptanoate	0	0	0	0	0	0	0	0	0	0	0	0	0	0	0	0	0	19.6928	18.6762	18.4902	0	0	0	0	12.7897	0	0	0	0	11.0878
C01585	Hexanoate	54.1077	67.1737	40.8727	70	55.0297	53.458	48.1556	64.8545	85.0803	84.2688	72.9638	61.9543	135.05	62.4869	66.4475	49.9824	74.6318	72.7342	68.6329	101.694	58.0385	55.3744	76.0668	78.4917	71.9996	13.3747	6.97078	10.9134	38.3529	3.06616
C00135	His	3533.66	2433.85	3254.61	4139.36	1204.1	1344.88	1798.69	1515.69	3814.65	2938.47	5131.5	5266.27	727.162	1139.08	3611.68	1513.85	1394.51	1280.21	3024.88	117.009	3340.37	1465.84	4287.72	1747.94	1899.87	708.257	255.871	1112.62	1283.36	975.966
C00388	Histamine	8.76926	0	9.61876	6.60882	2.95942	3.5858	14.9751	20.9902	0	0	0	0	0	0	3.81046	0	3.89047	12.133	5.42076	3.47363	6.24921	10.6276	0	0.952614	7.14808	4.35456	8.84442	0	1.90523	4.38436
C00263	Homoserine	182.423	0	158.491	194.185	151.978	175.906	0	0	197.997	199.588	0	122.705	79.6966	0	76.9224	61.425	81.9879	66.9504	63.5724	28.5126	133.775	81.971	130.073	54.511	70.8369	90.4114	95.1548	93.8427	37.2193	9.80366
C01015	Hydroxyproline	58.2088	102.326	61.9853	64.9016	287.606	307.106	149.247	268.149	14.0815	0	10.6828	15.285	15.2921	26.399	25.6962	14.5565	10.2996	11.0694	9.11414	10.5615	71.8553	253.027	10.0123	20.486	10.1611	20.4975	70.9906	6.95357	6.43546	0.984979
C00519	Hypotaurine	0	23.1085	23.9462	49.1522	0	0	0	0	0	0	0	34.8166	0	0	0	0	0	0	61.7228	108.261	24.0517	0	8.70416	0	20.5743	20.0784	0	17.4083	0	35.6356
C00262	Hypoxanthine	9813.48	11690.1	11926.1	10997.3	9046.71	8660.13	8445.08	10614.8	8054.1	11088.3	9130.57	10419.6	4157.46	4084.49	3060.43	2835.53	5791.03	4726.9	2981.02	357.514	11106.8	9191.69	9673.13	3534.48	4499.65	948.007	980.876	1350.97	684.074	1418.72
C00407	Ile	17029.5	24194.4	21758.3	15788.8	21331.1	20721.2	16228.6	19900.4	19472.4	17921.6	25409	23332.2	14326.4	18685.1	19543.7	12646.8	13618.6	13358.2	10632.6	417.958	19692.8	19545.3	21533.8	16300.5	12536.4	3952.46	2287.5	3442.33	3339.22	1653.91
C02835	Imidazole-4-acetate	11.8654	6.86175	14.5227	19.2116	9.48999	9.02572	9.77947	12.4603	8.06724	8.10434	6.99554	5.29154	0	0	7.12897	0	3.22894	5.46768	0	0	13.1154	10.1889	7.11466	1.78224	2.89887	5.15801	1.54576	1.3197	3.56449	2.74874
C00637	Indole-3-acetaldehyde	0	0	0	0	0	284.593	0	0	0	0	0	0	0	0	0	0	0	0	0	0	0	71.1483	0	0	0	0	142.297	0	0	0
C02693	Indole-3-acetamide	58.4343	0	0	68.6442	79.1212	51.4614	0	103.063	0	0	64.1161	0	67.0317	0	0	0	69.3156	0	0	0	31.7696	58.4113	16.029	16.7579	23.1052	36.9204	44.2825	32.0581	33.5159	40.0194
C00955	Indole-3-ethanol	77.1551	50.0347	39.6161	33.3978	74.4802	55.6242	48.8008	72.6782	36.5402	54.5879	29.5386	27.365	27.0435	32.0549	29.3844	29.3722	51.7318	49.1167	67.0077	36.971	50.0509	62.8958	37.0079	29.4637	55.9521	19.3292	12.6681	12.3565	2.04824	9.66337
C00294	Inosine	172.959	95.346	119.142	126.202	204.006	190.719	159.655	212.326	180.238	583.712	80.1858	305.99	102.284	88.8454	0	42.1053	81.4059	77.8837	41.8726	643.948	128.412	191.676	287.531	58.3086	67.0541	32.4993	23.1281	217.997	46.6503	21.8788
C05123	Isethionate	282.797	90.6627	61.2797	120.47	41.6443	51.3601	38.3028	33.6032	100.968	52.3386	155.746	122.481	58.1345	41.2496	131.361	75.6952	127.986	195.616	81.3291	64.4243	138.802	41.2276	107.883	76.6101	134.977	98.991	7.51725	43.3472	39.1161	57.4634
C02640	Isoamylamine	63.3789	0	75.2972	18.808	6.26006	5.57558	307.805	284.494	37.7682	31.913	8.60956	4.75125	0	0	0	0	3.03618	0	0	0	39.371	151.034	20.7605	0	1.01206	35.777	167.836	16.5084	0	1.75294
C00311	Isocitrate	0	0	21.8742	7.32503	0	9.47081	9.2238	11.2512	0	0	0	0	0	9.34528	0	0	0	0	0	0	7.2998	7.48645	0	2.33632	0	10.3116	5.07203	0	4.67264	0
C05771	Isopropanolamine	65.2072	40.4201	34.5004	71.414	52.988	37.3647	57.9248	49.9629	178.676	165.647	128.881	35.7077	0	21.5477	9.43169	7.67211	20.127	17.8697	32.9322	6.61135	52.8854	49.5601	127.228	9.66288	23.643	18.1524	8.76754	64.5539	8.91885	8.12352
C00490	Itaconate	0	0	0	16.8351	9.41076	0	10.2792	13.3786	0	0	0	14.6029	0	0	0	0	6.97013	0	0	0	4.20878	8.26715	3.65073	0	2.32338	8.41757	5.76857	7.30147	0	4.0242
C00186	Lactate	8837.57	3694.23	3532.46	20366.4	637.166	2673.66	1385.15	4738.46	7507.61	1988.07	3026.67	1829.46	2017.6	3288.25	1817.96	1153.65	1504.82	1468.98	2836.95	3463.36	9107.67	2358.61	3587.95	2069.36	1936.92	7899.81	1795.73	2666.5	892.579	779.661
C00123	Leu	30725.2	47535.2	37369.5	31669.3	39062.4	40422.3	33487.5	40379.5	33706.8	35605.1	44369.6	45578.3	21704.3	31378.4	25469.5	19671	27261.5	28049.5	25311.2	1094.47	36824.8	38337.9	39814.9	24555.8	26874	7719.98	3294.66	6027.52	5143.76	1409.68
C00047	Lys	23265.1	34894	31508.3	25730.2	35297.9	32080.7	27077.9	38416.8	25389.2	19565.5	30364.9	34857.1	14836.1	22918.9	17409.5	14275.6	20677.1	18629.1	19592.5	862.02	28849.4	33218.3	27544.1	17360	19632.9	5307.85	4842.44	6576.19	3949.18	1024.59
C00711	Malate	1645.77	1341.35	2048.96	2062.35	2747.26	2961.25	1350.26	2066.17	2997.14	2874.62	2565.55	4221.04	866.691	1265.94	181.662	561.868	709.362	151.874	94.2946	42.5317	1774.61	2281.23	3164.59	719.04	318.51	347.548	728.599	727.333	459.847	339.71
C00383	Malonate	359.074	160.764	162.404	211.214	126.696	127.384	109.825	80.0718	50.1666	52.4692	37.2336	39.5739	82.405	63.8007	58.9598	35.8966	51.868	25.7828	34.9393	0	223.364	110.994	44.8608	60.2655	37.53	93.452	22.1564	7.5755	19.1329	13.2342
C00073	Met	11629.2	16202.1	15162.2	13242.4	14613.1	13786.7	13218.2	15872.1	14743.3	15684.1	19423.5	19036.6	8555.92	10185.6	9184.68	7010.85	11144.4	10281.8	8251.84	345.342	14059	14372.5	17221.9	8734.27	9892.68	2031.5	1152.15	2355.74	1330.57	1485.03
C02989	Methionine sulfoxide	787.1	1803.38	476.57	474.673	1957.76	1720.53	671.676	575.043	574.787	565.116	657.329	1075.34	719.004	704.868	407.346	423.557	619.267	356.147	306.674	25.673	885.431	1231.25	718.144	563.694	427.363	629.335	709.682	241.701	171.401	168.025
C02704	Methyl sulfate	0	0	18.1822	14.5354	0	0	22.2449	0	0	0	0	0	0	9.78019	0	0	0	22.6383	0	0	8.17941	5.56123	0	2.44505	7.54612	9.56139	11.1225	0	4.8901	13.0703
C01026	N,N-Dimethylglycine	57.9568	39.6486	55.1842	31.463	20.4311	11.1925	11.9522	17.2103	0	0	0	0	0	0	0	0	0	0	0	0	46.0632	15.1965	0	0	0	12.6354	4.39749	0	0	0
-	N1,N8-Diacetylspermidine	7.86944	10.5401	8.6286	8.04573	0	0	0	11.9193	0	0	0	0	0	0	0	3.48914	0	0	0	0	8.77098	2.97983	0	0.872284	0	1.22324	5.95966	0	1.74457	0
C00612	N1-Acetylspermidine	19.2596	23.1501	58.6631	38.6421	85.0225	40.5482	52.2818	128.571	21.1631	18.7007	12.0561	18.4832	0	11.2912	9.32575	6.43617	12.5816	10.92	32.4027	3.83232	34.9287	76.6059	17.6008	6.76327	18.6347	17.9013	39.4252	3.89109	4.93008	11.9523
C03793	N6,N6,N6-Trimethyllysine	27.4056	33.5662	33.1489	41.7974	36.3329	40.9255	38.0092	51.8577	15.4339	13.0255	19.027	39.8007	6.80494	19.6793	13.4986	9.79442	12.6929	15.3251	15.036	4.07788	33.9795	41.7813	21.8218	12.4443	14.3513	5.9216	6.98044	12.237	5.54618	1.44351
C03795	N6-Methyl-2'-deoxyadenosine	32.1558	31.4478	36.7185	41.0902	31.383	37.1579	23.3639	29.1191	11.7621	20.2246	17.6867	15.1373	0	0	0	0	0	0	0	0	35.3531	30.256	16.2027	0	0	4.48153	5.70673	3.61622	0	0
C01029	N8-Acetylspermidine	6.41463	6.85569	15.4902	10.4606	25.1059	13.3462	13.8969	33.1353	10.0311	8.01174	7.86715	11.9524	0	0	3.55147	2.82997	4.5744	4.04137	10.4407	0	9.8053	21.3711	9.46561	1.59536	6.35215	4.20098	9.53251	1.92984	1.86556	3.55077
C01042	N-Acetylaspartate	91.5365	265.801	227.919	356.665	125.945	240.32	153.647	231.31	83.8828	52.2298	80.3472	111.809	156.059	117.862	59.5486	35.0864	163.839	152.907	118.969	79.1128	235.48	187.806	82.0671	92.139	145.238	110.124	56.6978	24.3658	54.9682	23.3972
C00140	N-Acetylglucosamine	30870.1	20681.4	20117.9	20108.4	4070.74	11663.3	8392.13	9590.21	26546.6	10021.5	25009.2	23165.8	9238.91	8211.86	15830.3	15166.5	11086.9	8676.52	31003	484.667	22944.5	8429.1	21185.8	12111.9	16922.1	5290.57	3204.42	7570.1	3942.13	12253.8
C04501	N-Acetylglucosamine 1-phosphate	9.84832	0	15.6823	20.4607	0	0	0	8.14061	13.9782	0	0	7.13719	0	0	0	0	0	0	0	110.241	11.4978	2.03515	5.27886	0	0	8.8084	4.07031	6.70486	0	0
C01239	N-Acetylglucosylamine	149.781	166.658	241.022	118.958	56.3725	94.3055	79.7183	115.457	145.945	78.6095	180.483	303.879	58.2558	210.886	73.5828	62.8477	104.97	0	222.668	0	169.105	86.4632	177.229	101.393	109.213	51.8527	24.8533	94.4374	73.2774	111.395
C00624	N-Acetylglutamate	144.069	279.133	301.409	236.49	240.576	247.638	155.191	277.612	174.838	188.105	209.851	222.762	151.686	113.482	127.675	102.726	238.401	123.26	120.973	122.162	240.275	230.254	198.889	123.892	160.878	69.5633	52.5547	21.4853	21.1595	67.1464
C02997	N-Acetylhistidine	21.5496	19.4218	20.6365	19.7365	24.9125	20.0922	12.7671	19.5384	9.57707	9.28108	11.7235	24.9303	0	4.91733	8.7289	6.58724	7.77497	0	0	0	20.3361	19.3276	13.878	5.05837	2.59166	0.958883	4.99537	7.44814	3.71561	4.48888
C02710	N-Acetylleucine	5.41134	12.0204	11.483	9.3838	25.255	20.2689	8.39347	18.4453	11.3596	5.88629	14.454	11.4754	3.73655	4.8956	7.6878	5.75613	7.53307	0	9.72209	0	9.57463	18.0907	10.7938	5.51902	5.75172	2.99961	7.07659	3.57144	1.6659	5.09997
C02712	N-Acetylmethionine	31.7919	44.1822	48.1703	71.2899	51.4247	60.647	50.3662	73.4259	49.0511	22.8755	33.9804	83.7368	16.8159	36.4167	20.615	20.7413	22.6857	23.1926	27.9964	5.94972	48.8586	58.9659	47.411	23.6472	24.6249	16.5003	10.6887	26.4866	8.70566	2.93078
C02713	N-Acetylmuramate	308.163	274.513	701.402	649.559	563.738	574.552	607.376	1265.57	965.516	741.145	407.213	365.097	79.8067	104.898	61.9025	61.9528	196.828	121.412	70.2607	9.50733	483.409	752.808	619.743	77.14	129.5	223.215	342.342	285.371	20.3342	63.6703
C00270	N-Acetylneuraminate	2634.82	2067.73	969.347	1289.39	194.776	609.261	282.108	432.648	1728.08	225.238	948.72	1004.02	438.87	385.065	890.711	720.448	332.324	228.991	1496.39	115.25	1740.32	379.698	976.516	608.773	685.901	753.895	181.864	613.949	238.657	703.801
C00437	N-Acetylornithine	116.658	55.9325	147.205	327.494	88.5135	101.98	186.505	559.558	247.759	267.412	172.04	195.596	65.6353	41.3769	0	0	211.328	215.348	142.853	16.3652	161.822	234.139	220.702	26.753	189.843	116.781	221.238	44.3926	32.4404	40.7441
C03519	N-Acetylphenylalanine	0	6.26276	9.26193	6.40935	6.20466	0	0	4.20829	0	0	4.35786	3.91391	0	0	0	0	0	0	0	0	5.48351	2.60324	2.06794	0	0	3.90767	3.11449	2.39472	0	0
C02714	N-Acetylputrescine	0	0	10.7159	12.3907	9.92908	10.1215	0	12.5953	9.13116	17.1881	14.9296	27.4532	0	0	6.31428	0	0	0	0	0	5.77664	8.16149	17.1755	1.57857	0	6.70524	5.5748	7.64605	3.15714	0
C02727	N-epsilon-Acetyllysine	24.7267	39.4873	40.1674	64.7923	63.0236	76.1119	49.5793	80.9619	32.5571	26.3502	35.6912	85.6933	21.7732	25.8339	20.4018	18.0551	39.7519	34.0853	26.6867	13.3782	42.2934	67.4192	45.0729	21.516	33.508	16.6051	14.1014	27.357	3.26239	6.5517
C01044	N-Formylaspartate	13.135	36.3043	37.6717	0	23.5142	27.6311	32.218	34.4695	0	0	0	0	0	0	0	0	0	0	0	0	21.7777	29.4582	0	0	0	18.3721	4.87846	0	0	0
C03145	N-Formylmethionine	64.7479	78.7357	57.0002	43.8915	109.471	85.9874	56.1137	82.301	20.182	20.9803	52.0951	38.4068	36.1812	30.9389	39.5584	26.7733	57.1332	35.6673	30.109	0	61.0938	83.4683	32.9161	33.363	40.9698	14.5747	21.8489	15.3036	5.64581	14.2711
C00153	Nicotinamide	0	0	0	0	0	0	0	0	0	0	0	0	0	0	0	0	0	0	0	23.024	0	0	0	0	0	0	0	0	0	0
C00253	Nicotinate	1428.67	1438.62	1777.86	1759.57	1550.54	1364.58	1371.03	1702.67	1688.71	1631.84	1940.11	1730.28	611.751	556.632	459.282	412.995	808.802	655.085	506.782	168.823	1601.18	1497.21	1747.74	510.165	656.89	193.637	161.833	134.449	90.3879	151.018
C02721	N-Methylalanine	22.9756	11.0717	19.9667	16.2037	25.5623	18.144	24.8296	32.0681	0	5.37337	0	5.38118	0	0	0	0	0	0	0	0	17.5544	25.151	2.68864	0	0	5.13347	5.69258	3.10457	0	0
C00547	Noradrenaline	0	0	0	0	17.9216	16.213	16.9527	29.5011	0	0	0	0	0	0	0	0	0	0	0	0	0	20.1471	0	0	0	0	6.27511	0	0	0
C02571	o-Acetylcarnitine	3.55201	0	0	0	0	0	0	0	3.29084	0	0	0	8.43385	17.8122	8.27369	4.64299	5.41425	9.40805	26.3481	25.4703	0.888003	0	0.822711	9.79069	13.7235	1.77601	0	1.64542	5.6269	11.1141
C06423	Octanoate	0	0	0	0	0	0	0	0	0	0	0	0	21.4726	0	0	8.25429	0	0	28.2615	24.6323	0	0	0	7.43171	9.4205	0	0	0	10.1371	16.3168
C04137	Octopine	185.69	41.1582	165.301	301.446	158.744	89.2338	203.247	308.663	232.25	340.941	252.74	124.121	0	46.9445	38.4108	14.9309	222.832	249.567	312.857	15.6684	173.399	189.972	237.513	25.0715	261.752	106.615	91.991	89.0963	21.508	46.2327
C00077	Ornithine	3154.28	3438.06	7040.51	4892.14	6627.48	5988.7	6181.06	10144.4	7686.61	6335.01	8219.46	8497.89	2529.64	3102.41	1203.95	1624.41	5604.99	4406.29	5676.84	105.643	4631.25	7235.41	7684.74	2115.1	5229.37	1777.43	1957.7	960.712	859.765	713.717
C00295	Orotate	308.323	154.834	637.119	539.189	326.287	301.686	355.347	534.555	488.804	419.105	414.776	418.912	166.101	89.297	0	151.061	238.922	213.043	159.21	0	409.866	379.469	435.399	101.615	203.725	218.876	105.691	35.6593	75.4558	40.6644
C00568	p-Aminobenzoate	0	0	0	10.1797	14.8385	8.93959	0	15.1323	0	0	0	0	0	0	0	0	0	0	0	0	2.54492	9.72758	0	0	0	5.08984	7.08469	0	0	0
C00864	Pantothenate	280.764	366.027	533.67	406.718	452.401	380.347	362.48	560.399	367.866	344.552	434.999	382.461	195.326	174.848	146.024	145.528	273.347	196.1	156.602	14.5924	396.795	438.907	382.469	165.432	208.683	105.266	89.8383	38.3421	24.188	59.381
C01601	Pelargonate	45.6226	50.7267	24.417	0	31.6553	33.6578	24.3098	0	37.6514	43.4603	0	0	62.2413	46.8124	45.2126	40.1029	67.5172	88.2177	106.282	64.895	30.1916	22.4057	20.2779	48.5923	87.339	23.1278	15.4683	23.5347	9.53864	19.3974
C00803	Pentanoate	1391.72	2258.19	1200.92	1204.72	4001.32	2926.2	2421.82	4014.21	2178.89	2543.46	2669.17	2414.26	2192.52	3759.9	3298.03	2997.22	4632.29	3604.67	4327.86	3722	1513.89	3340.89	2451.44	3061.92	4188.27	504.133	797.115	209.394	659.03	527.84
C00079	Phe	14274.8	20230.8	16215.1	14444.8	16851.2	17399.6	13965.7	17290.3	14180.4	14349.4	19290.8	20355.9	9084.8	12055.2	9801.96	8089.75	11536.2	11295.3	9597.68	292.511	16291.4	16376.7	17044.1	9757.93	10809.7	2768.97	1624.68	3239.24	1684.76	1056.57
C00166	Phenylpyruvate	125.856	200.452	386.107	268.346	187.686	203.987	122.811	464.678	320.402	134.162	189.244	158.704	115.752	71.2145	54.2492	65.7325	161.746	88.6846	130.739	0	245.19	244.79	200.628	76.7371	127.056	110.508	150.727	82.9676	26.9536	36.6695
C01606	Phthalate	17.3008	13.3714	13.7926	13.3615	3.97323	3.65771	3.79561	3.8934	2.37046	0	3.16888	2.42376	2.06901	2.95868	1.99826	0	12.9177	2.79561	0	0	14.4566	3.82999	1.99078	1.75649	5.23779	1.90676	0.135895	1.37632	1.24989	6.79634
C00156	p-Hydroxybenzoate	160.043	175.767	63.0944	97.6256	113.322	87.3251	0	0	84.0827	50.2176	45.1455	65.2882	44.0704	51.2948	88.1508	39.3251	73.7345	106.643	50.7669	0	124.133	50.1617	61.1835	55.7103	77.0482	52.8645	58.8861	17.4994	22.1799	28.0851
C00642	p-Hydroxyphenylacetate	0	0	0	0	0	0	0	0	0	0	0	0	0	0	0	0	0	0	0	572.12	0	0	0	0	0	0	0	0	0	0
C02656	Pimelate	26.8258	15.2805	0	29.144	16.1323	8.69666	0	15.0869	16.5556	0	0	0	0	0	0	0	12.9847	0	0	0	17.8126	9.97896	4.1389	0	4.32825	13.3334	7.42021	8.2778	0	7.49674
C00408	Pipecolate	47.8561	31.567	41.8346	57.8446	95.9909	101.501	93.0641	132.431	27.1433	40.4337	22.8624	29.1078	26.2443	29.6626	24.4635	14.5822	50.3202	40.1455	42.318	49.7356	44.7756	105.747	29.8868	23.7381	44.2612	11.0061	18.1301	7.49919	6.474	5.35848
C00148	Pro	14342.8	25121.7	17728	15929.2	19551.6	22144.6	16467.1	23265.6	19365.4	12981.9	20799.8	20824.8	12874.5	17128.9	17486.4	11816.2	13296.8	12198.5	15274	637.631	18280.4	20357.2	18493	14826.5	13589.7	4765.9	3024.08	3736.83	2901.08	1558.55
C10172	Proline betaine	27.0934	12.6447	9.0797	23.8765	4.18641	7.96671	9.0498	7.05004	13.8657	12.0434	14.923	2.72844	0	0	0	0	9.39842	5.47802	7.28855	0	18.1736	7.06324	10.8901	0	7.38833	8.66704	2.08479	5.56959	0	1.9621
C00163	Propionate	23360	23404.9	16795.8	14541.8	28917.4	24539	17883.8	26735.3	40442.6	36737.7	30704.1	31149.8	12169.5	22700.2	14260.3	13069.5	14949.9	9952.98	13242.8	8773.2	19525.6	24518.9	34758.6	15549.9	12715.2	4547.61	4770.91	4679.29	4843.21	2539.88
C15587	Purine	0	0	6.73545	0	6.83044	0	0	22.6361	7.03732	0	34.2287	0	0	0	0	0	0	0	0	0	1.68386	7.36663	10.3165	0	0	3.36772	10.6767	16.283	0	0
C00134	Putrescine(1,4-Butanediamine)	32.53	11.7384	43.6374	23.0463	29.2988	16.1904	29.2506	37.6799	8.38735	6.73292	28.177	58.8569	0	10.2684	6.54992	9.7096	15.07	10.5991	60.6065	15.6418	27.738	28.1049	25.5385	6.63199	28.7585	13.5862	8.87644	24.2548	4.71471	27.6716
C00250	Pyridoxal	10.9071	7.6756	13.4383	8.6411	19.3714	16.98	16.7777	22.5095	5.18739	6.68148	5.8342	9.47803	3.72476	0	0	0	10.9197	7.13593	4.34828	3.45023	10.1655	18.9096	6.79527	0.93119	7.46797	2.56806	2.67338	1.89025	1.86238	3.29827
C00534	Pyridoxamine	14.9087	13.9603	21.1401	27.8575	18.1632	14.7883	16.4544	26.6224	27.0825	28.6247	33.288	17.4406	6.2468	7.91571	6.96255	5.62366	7.66144	8.18709	6.42155	0	19.4666	19.0071	26.6089	6.68718	7.42336	6.4369	5.26054	6.65723	0.984908	0.906525
C00314	Pyridoxine	15.7798	9.41154	11.9472	17.1412	0	0	0	0	0	0	0	0	0	0	0	0	0	0	0	0	13.5699	0	0	0	0	3.53849	0	0	0	0
C05942	Pyrrole-2-carboxylate	0	0	0	16.0072	7.37948	16.1936	0	0	0	0	0	0	0	0	0	0	0	0	0	0	4.0018	5.89327	0	0	0	8.00359	7.69776	0	0	0
C00022	Pyruvate	614.927	1244	1490.68	911.212	1084.86	1126.15	432.695	1872.54	1856.28	458.821	842.478	1001.82	518.395	0	660.455	782.628	0	0	1086.99	0	1065.21	1129.06	1039.85	490.37	362.329	382.737	588.685	590.07	344.283	627.572
C00296	Quinate	59.8228	39.1261	30.7844	38.5632	0	26.4442	20.0379	0	46.4971	58.7235	62.309	42.6315	88.489	54.7568	147.324	45.6154	99.4636	59.7507	57.3782	30.4085	42.0741	11.6205	52.5403	84.0463	72.1975	12.4297	13.6707	9.45806	46.0385	23.6429
C00255	Riboflavin	0	59.4051	74.3666	60.143	80.4182	85.1888	90.321	94.4416	36.9676	54.026	65.0771	45.2823	0	0	0	0	0	0	0	0	48.4787	87.5924	50.3382	0	0	33.0445	6.09927	12.044	0	0
C00199	Ru5P	0	0	0	30.9678	0	0	0	0	0	0	0	0	24.5285	0	0	0	0	0	0	0	7.74195	0	0	6.13213	0	15.4839	0	0	12.2643	0
C00019	SAM+	0	0	0	0	0	0	0	0	0	0	0	0	0	0	0	0	0	0	0	8.28605	0	0	0	0	0	0	0	0	0	0
C00213	Sarcosine	56.877	132.86	178.143	55.3633	114.078	156.437	121.546	238.734	141.806	197.424	92.5883	176.071	35.9558	114.105	52.4704	147.758	83.9177	69.0206	21.4092	19.2816	105.811	157.699	151.972	87.5725	58.1158	60.2857	57.0908	45.7399	52.3539	32.6499
-	SDMA	4.50233	5.83349	6.29157	5.93967	10.3423	9.71694	10.6037	12.2775	3.43802	0	5.68156	6.46075	0	0	0	0	0	2.92509	0	0	5.64176	10.7351	3.89508	0	0.975028	0.784445	1.0935	2.89567	0	1.6888
C08277	Sebacate	52.1667	41.9829	66.6804	51.7493	33.1484	21.847	22.6338	29.7008	4.87191	4.47569	3.38729	4.56924	5.85386	6.94929	4.3628	3.37448	11.7433	7.20984	6.1455	4.46906	53.1448	26.8325	4.32603	5.13511	8.36621	10.1768	5.49551	0.648274	1.58157	2.97266
C00065	Ser	22426.8	24302.7	15674.9	17945.4	20151	21639	18053.8	4404.36	22515	23958.3	29086.3	26174.4	22261.5	24753.1	25329.7	18317.4	17956.3	16305.3	20578.2	746.33	20087.4	16062	25433.5	22665.4	18279.9	3970.73	7909.72	2862.75	3189.84	2154.73
C00315	Spermidine	49.2636	32.5356	80.2754	42.9362	151.633	62.3673	86.1447	124.082	23.3317	20.8585	35.9814	47.2584	6.43803	66.1839	23.4976	24.2359	33.1352	33.8465	78.5746	55.7324	51.2527	106.057	31.8575	30.0888	48.5187	20.5408	39.612	12.2183	25.4291	26.0316
C00042	Succinate	3172.28	1149.24	1593.67	1480.27	1240.62	1019.9	635.423	2744.75	6372.95	2012.14	2746.97	838.526	1016.39	840.349	1674.57	1203.53	1522.19	573.409	1462.43	446.757	1848.86	1410.17	2992.65	1183.71	1186.01	902.197	924.192	2386.66	359.274	531.371
C10833	Syringate	236.581	0	0	106.403	0	0	0	0	0	0	0	0	0	0	0	0	0	0	0	0	85.7459	0	0	0	0	112.372	0	0	0	0
C00898	Tartrate	0	0	0	0	0	0	0	0	0	16.4281	20.073	0	39.4444	28.5422	15.1903	0	0	0	0	0	0	0	9.12529	20.7942	0	0	0	10.6415	17.0457	0
C00245	Taurine	2205.82	1234.55	1655.56	2326.82	2608.23	2893.28	3795.52	4312.96	1663.17	1323.29	2937.45	3474.14	3760.03	3146.98	6333.95	2864.85	3235.72	3034.74	6512.31	3029.06	1855.69	3402.5	2349.51	4026.45	4260.92	506.76	790.269	1022.2	1583.07	1952.34
C05122	Taurocholate	74.0132	76.345	47.9843	59.0205	82.6006	52.1646	84.5866	78.2328	35.1123	47.8437	77.9916	105.846	92.1226	41.6282	166.401	34.7849	102.348	72.2035	481.86	636.686	64.3408	74.3961	66.6985	83.7341	218.804	13.3354	15.0568	31.6927	60.7538	228.311
C06337	Terephthalate	14.7824	11.1762	11.6492	0	0	0	0	0	0	14.1094	0	11.7418	6.02968	16.2479	7.37787	7.14288	0	7.61232	7.20631	0	9.40192	0	6.46278	9.19959	4.93954	6.46899	0	7.52491	4.73554	4.28258
C00378	Thiamine	90.2571	77.8846	129.03	97.876	176.076	140.763	176.553	225.698	13.9887	17.1516	19.0857	30.6906	12.8061	28.0872	21.1163	7.43374	17.8054	17.0144	20.6037	0	98.7618	179.772	20.2291	17.3608	18.4745	21.7953	34.9042	7.28385	9.10037	1.88591
C00188	Thr	21349.2	34518.7	27419.8	22053.6	26413.9	28339.5	19594.3	25528.4	22799.2	15317.5	25431.1	28036.6	14566.9	21139.2	21319.1	15734.2	16267.3	13381.7	17040.5	707.637	26335.3	24969	22896.1	18189.8	15563.2	6091.99	3770.44	5486.23	3542.48	1928.37
C00214	Thymidine	525.256	0	315.161	311.744	320.24	0	0	359.91	354.214	373.817	323.192	559.224	166.222	294.047	231.462	130.95	210.046	262.326	262.241	102.266	288.04	170.037	402.612	205.67	244.871	216.438	197.009	106.468	72.1456	30.159
C01494	trans-4-Hydroxy-3-methoxycinnamate	5064.01	2131.46	4148.17	3949.51	1625.5	2081.35	1809.6	1418.64	236.207	190.364	214.529	186.048	173.351	135.776	294.882	145.466	171.978	161.161	141.856	0	3823.29	1733.77	206.787	187.369	158.332	1227.89	281.422	23.2758	73.424	15.2593
C01004	Trigonelline	18.5948	0	0	10.0303	0	8.37326	0	0	7.92894	0	27.8735	7.98919	0	0	22.7943	0	9.85613	0	13.1088	0	7.15629	2.09331	10.9479	5.69858	7.65497	8.97265	4.18663	11.8912	11.3972	6.82597
C00565	Trimethylamine	1146.69	274.036	827.94	1123.34	735.613	740.543	1196.4	1402.58	864.89	441.158	1039.84	254.022	0	715.16	0	0	25.1825	0	0	0	843	1018.78	649.979	178.79	8.39418	406.105	334.888	364.495	357.58	14.5391
C01104	Trimethylamine N-oxide	7.4978	0	0	0	0	0	0	0	0	0	0	0	5.23086	10.7585	0	0	0	0	5.20791	7.58029	1.87445	0	0	3.99734	1.73597	3.7489	0	0	5.13783	3.00679
C00078	Trp	1672.12	2136.76	1522.02	1684.13	1525.91	1505.45	1627.58	1674.59	1763.06	1821.33	2190.92	2420.67	1054.22	1644.83	1478.78	983.655	1324.81	1474.5	1385.5	51.3811	1753.76	1583.38	2049	1290.37	1394.94	265.775	80.9306	311.917	321.965	75.286
C00398	Tryptamine	10.8112	0	0	0	23.1054	15.5256	0	20.8518	0	5.61529	0	0	0	0	0	0	23.6406	0	16.1291	0	2.7028	14.8707	1.40382	0	13.2566	5.4056	10.4107	2.80764	0	12.0792
C00082	Tyr	10582.4	11027.4	15465.4	14736.8	19771.2	18450.5	16683.7	19154.8	16107.1	16583.3	21778.5	23277.9	10666.2	12937.3	10711.6	8708.92	13083	12121.2	9873.76	340.402	12953	18515.1	19436.7	10756	11692.7	2504.76	1334.81	3627.04	1728.08	1646.96
C00483	Tyramine	0	0	0	0	18.2561	0	18.6318	12.6697	0	0	0	0	0	0	0	10.5983	0	0	0	0	0	12.3894	0	2.64958	0	0	8.69794	0	5.29916	0
C00043	UDP-N-acetylglucosamine	0	0	0	30.7553	0	0	0	0	0	0	0	0	0	0	0	0	0	0	0	0	7.68882	0	0	0	0	15.3776	0	0	0	0
C00105	UMP	0	13.1086	0	21.0596	0	16.1772	0	0	16.9159	22.6899	19.047	41.2099	28.7359	13.1576	0	0	10.1426	0	0	52.3734	8.54203	4.04431	24.9657	10.4734	3.38086	10.3839	8.08861	11.0888	13.6639	5.85582
C17715	Undecanoate	0	0	0	0	0	8.62557	0	0	6.70731	10.3428	11.576	15.9417	0	13.0407	0	0	0	7.97036	5.37951	10.7414	0	2.15639	11.1419	3.26018	4.44996	0	4.31278	3.80924	6.52035	4.06567
C00106	Uracil	3775.91	6093.73	5651.12	4457.33	4682.61	4885.7	3590.81	4692.82	3194.79	5378.39	3965.15	4417.81	2563.25	2894.47	1681.87	1944.38	2977.21	2569.52	1318.46	163.703	4994.52	4462.99	4239.04	2270.99	2288.4	1066.61	588.909	912.058	556.141	864.373
C00366	Urate	327.491	1047.67	365.721	224.226	402.843	759.386	156.288	115.822	311.832	228.985	470.333	891.727	316.254	724.326	394.545	273.779	188.921	210.354	155.454	46.7661	491.278	358.585	475.719	427.226	184.91	375.715	295.78	294.86	204.285	27.6691
C00086	Urea	85.5843	97.9217	87.4012	99.0103	120.742	70.4216	84.0533	47.9852	74.1542	83.7969	70.4763	71.4515	50.8747	92.1029	189.567	85.9531	120.997	113.066	85.8919	73.1657	92.4794	80.8006	74.9697	104.624	106.652	6.96662	30.4985	6.08696	59.469	18.4107
C00299	Uridine	1166.9	714.873	813.72	856.615	1088.51	800.533	975.697	871.076	993.85	1742.37	1398.59	444.535	549.309	834.464	678.669	384.353	513.339	605.663	730.532	294.117	888.027	933.953	1144.83	611.699	616.511	195.158	125.676	558.167	191.214	109.002
C00785	Urocanate	2765.32	3609	3031.65	2279.93	2249.89	2088.58	2881.82	2829.77	2717.17	1677.63	1889.09	2024.83	2495.78	2960.65	1818.95	2030.78	1750.53	3087.76	1499.01	75.5681	2921.47	2512.51	2077.18	2326.54	2112.43	554.016	402.38	449.94	508.544	853.973
C00183	Val	22212.1	41486.6	30320.8	22893.2	30480.4	32054	22972.3	29196	26075.8	23612.5	33271.9	34436.1	18546.5	26012.6	25894.6	18778.7	18884.6	17831.2	16628.4	924.453	29228.2	28675.7	29349.1	22308.1	17781.4	8959.53	3977.81	5319.42	4210.8	1128.94
C00385	Xanthine	8425.72	10468.8	10656.2	10038.2	7526.67	9012.77	6997.3	8829	7938.63	9409.86	9763.36	10207.7	4155.87	5066.81	1965.43	3009.55	5748.96	4193.16	2065	100.468	9897.22	8091.43	9329.89	3549.41	4002.37	1014.55	984.708	983.276	1350.4	1849.37
C02470	Xanthurenate	0	0	0	0	0	0	0	0	8.49731	0	0	0	0	0	13.0826	0	0	0	0	0	0	0	2.12433	3.27064	0	0	0	4.24866	6.54129	0
C01234	1-Aminocyclopropane-1-carboxylate	10.2798	6.037	4.7629	12.9092	5.70348	0	5.81779	0	0	0	0	0	0	0	0	0	0	0	0	0	8.49722	2.88032	0	0	0	3.77011	3.32623	0	0	0
C05127	1-Methylhistamine	7.92147	5.01079	9.87553	7.02663	3.75543	0	0	4.53885	0	0	0	0	0	0	13.4977	3.39592	3.94181	9.2119	0	0	7.45861	2.07357	0	4.22342	4.38457	2.01942	2.41562	0	6.38677	4.62188
C00986	1,3-Diaminopropane	21.1592	17.4251	13.3376	9.66022	7.9794	0	0	18.096	0	0	0	0	0	0	0	0	0	0	0	0	15.3955	6.51886	0	0	0	4.98225	8.58595	0	0	0
C03722	2,3-Pyridinedicarboxylate	34.4503	33.9111	39.6238	34.8454	26.9787	17.0222	20.655	28.6441	21.5897	14.2943	20.4862	22.0899	12.6661	8.42916	31.4873	12.6359	36.9158	23.3075	8.96006	8.93207	35.7077	23.325	19.615	16.3046	23.0611	2.63871	5.43131	3.60988	10.3156	13.9795
C00628	2,5-Dihydroxybenzoate	36.4275	0	0	0	59.3537	66.9904	92.5878	67.775	0	0	0	0	0	0	0	0	0	0	0	0	9.10688	71.6767	0	0	0	18.2138	14.449	0	0	0
C02356	2AB	350.192	895.61	579.756	335.4	765.553	925.022	289.408	562.344	401.47	534.764	365.381	865.166	192.579	436.795	284.032	423.896	342.687	236.903	347.894	173.824	540.24	635.582	541.695	334.325	309.161	261.997	274.389	227.619	117.11	62.6319
C01987	2-Aminophenol	11.1056	0	7.39389	14.187	0	0	0	0	0	0	0	0	0	0	0	0	0	0	0	0	8.17164	0	0	0	0	6.11484	0	0	0	0
C00881	2'-Deoxycytidine	0	0	0	0	0	0	0	0	0	0	0	34.508	31.9969	50.8421	11.699	6.23969	0	11.9486	9.34445	0	0	0	8.627	25.1944	7.09768	0	0	17.254	20.3755	6.28317
C00330	2'-Deoxyguanosine	0	0	0	0	0	0	0	0	0	0	0	112.233	58.0283	86.497	339.796	162.97	43.0007	93.4151	142.349	0	0	0	28.0583	161.823	92.9214	0	0	56.1167	126.653	49.6758
C05984	2-Hydroxybutyrate	62.7752	0	44.0527	78.2973	19.0453	54.6897	0	0	67.5203	35.0118	0	36.7736	0	0	0	0	20.1738	0	34.8409	0	46.2813	18.4337	34.8264	0	18.3382	33.8821	25.7842	27.6019	0	17.4928
C02630	2-Hydroxyglutarate	82.5119	217.796	255.643	246.045	475.685	200.295	165.9	469.323	701.716	429.757	347.411	184.088	53.6448	42.7864	89.1125	69.3711	115.552	72.4059	52.4012	62.2185	200.499	327.801	415.743	63.7287	80.1198	80.2817	167.698	216.264	20.1366	32.2744
-	2-Hydroxypentanoate	31.7776	24.8768	35.0622	27.3096	20.9576	18.1099	21.0626	19.3958	15.9376	35.8329	11.2957	13.9232	11.5656	12.4663	10.1285	8.73109	19.9378	14.8085	16.6475	15.5817	29.7566	19.8815	19.2474	10.7229	17.1313	4.5473	1.40564	11.2191	1.64013	2.59867
C02504	2-Isopropylmalate	6.53053	5.28181	4.52346	7.85754	3.65305	4.06706	3.67421	0	9.28277	5.77468	3.22527	1.69216	0	0	0	0	0	0	0	0	6.04833	2.84858	4.99372	0	0	1.46271	1.90857	3.31831	0	0
C00026	2-Oxoglutarate	761.71	1893.76	3898.3	1693.43	1434.44	1523.79	791.424	3507.07	2267.16	1097.66	1416.81	1053.31	1276.4	655.365	655.976	764.178	1473.28	702.865	876.701	0	2061.8	1814.18	1458.73	837.979	1017.61	1319.96	1174.8	562.749	296.721	404.075
C00141	2-Oxoisopentanoate	408.753	1161.74	1600.96	986.264	816.733	1016.94	368.912	1674.2	962.817	417.127	666.106	605.274	608.819	376.765	395.116	517.295	531.721	264.512	362.559	0	1039.43	969.198	662.831	474.499	386.264	493.578	542.495	226.337	109.128	135.173
C01744	3-(4-Hydroxyphenyl)propionate	1357.88	1126.21	1115.54	1566.49	1475.39	1722.48	2134.98	1933.5	259.489	71.5655	110.856	107.592	47.671	146.915	130.071	59.5004	257.682	222.874	146.417	47.8314	1291.53	1816.59	137.376	96.0393	208.991	214.715	283.029	83.3324	49.7362	56.917
C05145	3-Aminoisobutyrate	46.0891	12.7096	20.4409	19.7659	10.7278	8.51595	27.4624	26.2817	39.4004	12.628	11.2589	12.2516	4.61216	8.31568	6.47133	3.71254	15.7144	8.13047	27.6064	6.30767	24.7514	18.247	18.8847	5.77793	17.1504	14.6485	10.0118	13.6893	2.04498	9.81703
C03761	3-Hydroxy-3-methylglutarate	302.137	84.2665	85.4152	209.407	45.9808	49.5163	53.2159	42.2267	26.2807	0	0	6.13351	0	8.47935	6.69774	0	13.0294	0	0	0	170.306	47.7349	8.10355	3.79427	4.34314	105.7	4.71284	12.4582	4.44121	7.52253
C01089	3-Hydroxybutyrate	911.269	393.95	582.952	623.511	538.323	539.866	1029.44	429.406	104.438	103.292	108.299	131.872	99.458	119.889	99.1116	87.0923	104.679	130.751	0	0	627.921	634.258	111.975	101.388	78.4769	213.752	268.479	13.4362	13.6084	69.2019
C01013	3-Hydroxypropionate	129.849	150.844	177.407	208.069	166.839	221.741	142.934	315.555	0	0	0	106.861	0	0	88.7477	105.938	130.056	0	0	0	166.543	211.767	26.7153	48.6714	43.352	33.8395	76.6551	53.4307	56.6374	75.0878
C08262	3-Methylbutanoate	617.133	1143.24	791.476	549.761	1680.35	1294.78	775.271	1866.37	555.255	894.141	798.856	999.608	736.118	849.647	1086.97	1228.8	1923.44	1223.42	1374.17	1286.82	775.403	1404.19	811.965	975.384	1507.01	265.535	482.143	189.767	223.405	368.433
C01152	3-Methylhistidine	6.56897	8.54808	6.93908	8.14717	14.667	17.7467	11.8864	19.5909	4.41131	0	0	10.769	3.3353	6.89845	5.50092	4.5504	3.57525	0	0	0	7.55083	15.9727	3.79508	5.07127	1.19175	0.946644	3.39807	5.09316	1.50644	2.06417
C05607	3-Phenyllactate	64.5355	53.7308	71.7364	204.201	0	0	21.8511	118.926	135.987	50.6796	63.3883	33.3613	0	0	0	0	0	0	0	6.8111	98.551	35.1942	70.8542	0	0	70.8211	56.7634	45.1324	0	0
C05135	4-(beta-Acetylaminoethyl)imidazole	4.21445	12.1266	11.1861	5.14803	0	11.4325	10.4097	14.9301	0	0	0	0	0	0	19.6417	6.6803	4.06326	6.43956	0	0	8.16878	9.19305	0	6.5805	3.50094	4.06325	6.42705	0	9.25941	3.2564
C02129	4-Acetylbutyrate	10.6666	23.2686	15.558	22.9853	15.2292	0	22.7199	22.4358	18.8521	0	22.591	13.9948	12.8657	21.4613	0	0	17.9233	29.9097	36.2269	0	18.1196	15.0962	13.8595	8.58173	28.02	6.11814	10.6443	9.88717	10.5123	9.29701
C00233	4-Methyl-2-oxopentanoate	2069.05	5243.5	7995.65	5031.44	4286.31	4769.05	2031.39	9084.01	4756.79	2007.39	3210.98	2958.95	2915.79	1713.63	1788.1	2288.91	2748.89	1506.24	2062.45	52.015	5084.91	5042.69	3233.53	2176.61	2105.86	2421.83	2946.59	1140.12	555.065	622.458
C04294	4-Methyl-5-thiazoleethanol	3.01654	3.17943	3.21015	2.73426	2.99651	2.97194	2.4271	3.67043	5.09015	6.48804	6.96083	3.53834	0	0	0	0	0	0	0	0	3.03509	3.0165	5.51934	0	0	0.217812	0.509052	1.54109	0	0
C01180	4-Methylthio-2-oxobutyrate	356.145	600.92	949.6	580.135	515.038	575.427	320.261	1039.54	799.379	363.493	533.945	348.242	311.421	208.163	0	178.757	368.264	222.802	316.564	0	621.7	612.567	511.265	174.585	302.544	245.084	304.762	209.712	129.549	73.7376
C00847	4-Pyridoxate	0	0	0	0	0	0	0	0	0	0	0	0	3.50051	5.6845	11.8205	5.75678	12.4566	15.2049	6.19242	4.12928	0	0	0	6.69057	11.2846	0	0	0	3.57662	4.61914
C00430	5-Aminolevulinate	6.21168	0	6.95146	6.35414	39.654	23.9456	22.5407	14.9114	0	0	0	0	21.1886	8.00402	21.4598	8.39994	0	0	0	0	4.87932	25.2629	0	14.7631	0	3.26863	10.3827	0	7.57866	0
C00431	5-Aminovalerate	4093.21	2842.84	2507.62	3437.18	2771.9	2911.94	2371.29	3529.65	3848.28	4935.63	6907.85	9989.55	724.318	1317.87	1811.24	1377.8	2609.49	1387.21	2179.23	1546.18	3220.21	2896.19	6420.33	1307.8	2058.64	697.47	480.445	2695.47	446.804	620
C05635	5-Hydroxyindoleacetate	963.377	540.931	810.304	939.907	1148.31	1037.12	1158.31	916.999	0	0	0	0	0	0	0	0	0	0	0	0	813.63	1065.18	0	0	0	193.861	113.031	0	0	0
C16741	5-Hydroxylysine	5.88589	6.62894	0	0	23.1631	21.513	20.4082	20.5704	0	0	0	10.5086	0	7.58985	6.08869	0	5.53186	6.2279	8.54507	0	3.12871	21.4137	2.62715	3.41963	6.76828	3.62543	1.26393	5.25431	3.99593	1.57761
C02376	5-Methylcytosine	18.9224	34.1885	14.8643	27.9982	0	9.83256	0	0	0	0	6.42558	5.35563	0	6.30931	5.56709	5.87015	4.1885	10.3649	5.47371	0	23.9933	2.45814	2.9453	4.43664	6.67571	8.73755	4.91628	3.42888	2.97341	3.25894
C00170	5-Methylthioadenosine	0	0	0	0	0	0	0	0	0	0	0	0	0	0	0	0	0	0	0	5.43682	0	0	0	0	0	0	0	0	0	0
C01879	5-Oxoproline	540.784	542.041	1613.99	813.629	1337.33	1240.85	1125.7	2485.15	1810.12	2353.36	2274.9	2285.25	1230.58	830.48	1124.23	1019.06	1937.16	1079.29	941.01	94.3882	877.612	1547.26	2180.91	1051.09	1319.16	507.416	631.216	249.631	170.548	539.658
C02378	6-Aminohexanoate	14.2962	0	24.311	12.2117	11.5686	0	0	0	14.4624	0	22.8201	25.3786	9.71977	0	20.7171	19.1195	24.5826	21.3456	24.8494	20.5802	12.7047	2.89215	15.6653	12.3891	23.5925	9.98152	5.7843	11.4366	9.57894	1.95044
C06103	6-Hydroxyhexanoate	0	0	0	0	0	0	0	0	0	37.749	0	11.8294	26.7406	27.8836	29.8128	0	57.4918	53.885	37.556	35.4041	0	0	12.3946	21.1092	49.6443	0	0	17.799	14.1298	10.6229
C01020	6-Hydroxynicotinate	0	65.7	0	0	0	0	0	0	0	0	0	0	0	0	0	0	0	0	0	0	16.425	0	0	0	0	32.85	0	0	0	0
C08434	6-Methylaminopurine	14.3476	8.80367	10.4994	10.1123	18.3193	18.6355	14.6579	0	8.42521	11.812	16.4873	11.688	7.77508	0	0	5.9507	7.50852	0	0	0	10.9407	12.9032	12.1032	3.43145	2.50284	2.38431	8.78947	3.31689	4.03169	4.33505
C02242	7-Methylguanine	29.5895	31.5213	34.3067	28.3158	28.6316	26.1065	22.5258	32.8527	38.8986	47.8307	51.5566	38.8769	14.8696	15.8083	14.7819	14.7801	21.8992	16.9245	16.1865	0	30.9333	27.5291	44.2907	15.06	18.3367	2.60656	4.34407	6.42155	0.500629	3.10715
# MasterHands Ver.2.18.0.2
# Engine Ver.1.48

## Sheet: Table S6
Supplementary Table 6: Serum metabolome of specific-pathogen-free (SPF) mice.
Concentrations of metabolites detected by CE-TOFMS in serum of specific-pathogen-free (SPF) mice fed all diets: fiber-rich 1 (FR1), fiber-rich 2 (FR2), inulin-supplemented (IN), fiber-supplemented (FS) or fiber-free (FF).
	N.D.	Not detected
	Concentration	>500µM
	S/N	>10.0
[μM (Serum of mice)]
KEGG ID	COMPOUND	Serum																				Average					S.D.
		Fiber-rich 1				Fiber-rich 2				Inulin-supplemented				Fiber-supplemented				Fiber-free
		Serum 560 (FR11)	Serum 561 (FR12)	Serum 562 (FR13)	Serum 563 (FR14)	Serum FR2 4	Serum FR2 5	Serum FR2 6	Serum FR2 8	Serum In1	Serum In3	Serum In4	Serum In6	Serum FS 1	Serum FS 2	Serum FS 5	Serum FS 7	Serum 566 (FF1)	Serum 567 (FF2)	Serum 568 (FF3)	Serum 569 (FF4) *outlier*	Serum					Serum
		μM	μM	μM	μM	μM	μM	μM	μM	μM	μM	μM	μM	μM	μM	μM	μM	μM	μM	μM	μM	FR1	FR2	IN	FS	FF	FR1	FR2	IN	FS	FF
C00054	Adenosine 3',5'-diphosphate	0	0	0	0	0	0	0	0.702805	0	0	0	0	0	0	0	0	0	1.33772	0	0	0	0.175701	0	0	0.445906	0	0.351403	0	0	0.772332
C03626	ADMA	1.76829	2.2163	1.90618	2.13476	3.51461	4.0535	4.1846	3.17997	1.39397	1.526	1.12451	1.59635	1.20913	1.57262	1.54015	1.45832	1.7637	0	1.21366	1.1169	2.00638	3.73317	1.41021	1.44505	0.992457	0.205975	0.469111	0.208122	0.164472	0.902421
C00008	ADP	0	0	0	0	0	0	0	0.833205	0	0	0	0	0	0	0	0	0	0.511214	0	0	0	0.208301	0	0	0.170405	0	0.416602	0	0	0.29515
C00041	Ala	982.443	761.024	892.945	908.87	454.736	620.776	652.568	1463.68	573.228	656.078	630.292	753.305	804.303	531	615.838	581.297	845.278	1671.75	594.147	464.8	886.32	797.94	653.226	633.11	1037.06	92.1795	452.223	75.1655	119.326	563.817
C00956	alpha-Aminoadipate	1.92691	2.63638	2.34399	2.7873	2.72443	2.48449	2.3328	3.60209	3.6982	4.31364	3.90567	3.91168	5.13632	3.41261	3.6864	2.78114	3.89603	6.99497	4.617	4.96055	2.42365	2.78595	3.9573	3.75412	5.16933	0.378853	0.567473	0.25746	0.996392	1.62162
C00020	AMP	0	0	0	0	0	0	0	3.59239	0	0	0	0	0	0	0	0	0	1.21224	0	0.824401	0	0.898098	0	0	0.40408	0	1.7962	0	0	0.699888
C01262	Anserine	3.61318	0.743163	4.82002	0.845629	2.94811	2.4834	10.0143	3.53777	5.77121	15.0911	2.64018	2.558	16.2777	7.85971	1.07364	3.89188	2.9027	11.9118	7.57734	2.77082	2.5055	4.74589	6.51512	7.27573	7.46394	2.03674	3.53867	5.90972	6.61545	4.50561
C00062	Arg	232.48	309.961	272.505	354.25	300.13	291.038	258.364	1.47024	221.925	50.2513	252.442	218.568	316.003	290.379	270.832	264.066	32.5176	1.71305	258.896	236.035	292.299	212.751	185.796	285.32	97.7088	52.0255	141.991	91.6394	23.2999	140.439
C00152	Asn	96.4939	52.2851	86.8221	72.5887	66.4666	91.0611	81.2209	60.3852	67.3164	80.4318	75.8572	90.0518	80.8066	85.2472	71.1088	87.5459	101.668	42.1875	90.6258	74.5767	77.0475	74.7834	78.4143	81.1771	78.1606	19.2073	13.9389	9.47282	7.27177	31.6391
C00049	Asp	63.3483	39.3998	59.5773	27.4212	44.2457	62.8244	83.6737	67.7296	65.6419	58.6409	47.648	77.4855	121.169	71.0833	17.897	46.6127	74.3286	124.005	60.5388	48.6108	47.4367	64.6184	62.3541	64.1906	86.2909	16.9881	16.2383	12.5144	43.7652	33.3815
C00002	ATP	0	0	0	0	0	0	0	0	0	0	0	0	0	0	0	0	0	0.682681	0	0	0	0	0	0	0.22756	0	0	0	0	0.394146
C08261	Azelate	2.11916	1.13623	2.52222	0.954087	0.923781	0.560699	0.857648	1.00758	0.583431	0.53665	0.506523	0.55953	1.1007	0.873515	0.764911	0.742792	0.501325	0.612945	1.03445	0.740146	1.68292	0.837426	0.546534	0.87048	0.71624	0.758244	0.194418	0.0328068	0.163769	0.281173
C00099	beta-Ala	4.00245	2.99904	3.01609	3.48272	2.99258	4.03717	3.52714	30.3784	2.36817	4.97519	3.5329	3.57711	5.06985	4.52806	3.04882	3.61341	5.65657	50.4419	3.23055	2.97343	3.37507	10.2338	3.61334	4.06504	19.7763	0.4745	13.4365	1.06659	0.905671	26.5848
C00719	Betaine	116.186	98.2501	101.959	104.657	42.2803	63.4412	50.3062	110.265	59.4871	56.3196	52.0411	82.3064	86.1319	93.8433	49.8181	83.9629	64.2517	149.835	50.0736	49.6209	105.263	66.5732	62.5385	78.439	88.0533	7.74123	30.4058	13.5272	19.546	53.9719
C00576	Betaine aldehyde	0	0	0	0	0	0	0	0	0	0	0	0	0	0	0	0	0	39.6763	0	0	0	0	0	0	13.2254	0	0	0	0	22.9071
C00246	Butyrate	27.9777	23.994	32.2263	24.1343	56.0494	63.828	70.3436	46.1504	87.7147	80.0493	70.7305	79.1966	77.2417	86.1255	34.1923	67.7917	63.0505	112.202	68.7561	83.6823	27.0831	59.0928	79.4228	66.3378	81.3361	3.89406	10.4206	6.94633	22.7002	26.8821
C00318	Carnitine	56.5573	47.9006	54.9509	47.9177	35.966	49.4288	37.4028	76.5675	31.4531	39.2256	30.9689	36.656	48.894	27.3786	31.166	25.2668	46.0717	109.028	29.5891	22.7897	51.8316	49.8413	34.5759	33.1763	61.5631	4.57651	18.8122	4.02943	10.7589	41.9242
C00386	Carnosine	2.93823	1.73594	3.8025	1.98649	1.83482	2.19436	7.37568	4.62369	4.13217	8.8369	2.55366	2.10878	9.37341	4.43449	2.24186	3.427	3.25459	7.16373	3.74983	2.28855	2.61579	4.00714	4.40788	4.86919	4.72271	0.945586	2.56465	3.07767	3.13368	2.12844
C00695	Cholate	0	2.40881	0.536233	0.63729	1.93821	3.54298	2.57706	4.53325	1.95677	0.721877	2.27716	6.4664	0	0	0	1.29794	0	0	0	0	0.895584	3.14787	2.85555	0.324486	0	1.04687	1.13497	2.49888	0.648971	0
C00114	Choline	105.891	76.6567	104.155	70.3555	76.8142	98.54	111.947	258.07	65.7996	142.076	98.4539	103.221	162.538	123.223	58.8758	81.6927	142.314	448.09	97.1796	98.0068	89.2647	136.343	102.388	106.582	229.195	18.391	82.4325	31.2519	45.8379	190.908
C00417	cis-Aconitate	5.80829	6.53534	5.962	6.19349	6.20443	7.22939	6.6864	6.17462	5.99684	5.65584	5.46759	4.63222	5.81107	6.33285	6.24655	4.92807	4.53684	2.99026	5.53055	5.94423	6.12478	6.57371	5.43812	5.82963	4.35255	0.316198	0.496072	0.580206	0.642966	1.28013
C02226	Citraconate	0	0	0	0	0.126638	0	0	0.110255	0	0	0	0.192482	0	0	0	0	0	0	0.16377	0	0	0.0592232	0.0481205	0	0.05459	0	0.0687114	0.0962409	0	0.0945526
C00158	Citrate	140.567	171.34	168.539	182.565	163.597	172.711	204.001	193.139	170.292	158.794	156.599	153.742	152.505	148.836	143.234	149.92	136.761	90.6728	144.382	167.94	165.753	183.362	159.857	148.624	123.939	17.8507	18.4902	7.25774	3.9089	29.06
C00327	Citrulline	128.22	173.851	153.89	158.333	135.268	133.97	137.958	129.892	109.103	105.041	98.7359	137.811	139.708	132.223	127.608	110.577	162.195	119.975	136.025	113.67	153.574	134.272	112.673	127.529	139.398	18.9453	3.35927	17.2933	12.352	21.3111
C00055	CMP	0	0	0	0	0	0	0	1.06208	0	0	0	0	0	0	0	0	0	1.07046	0	0	0	0.265519	0	0	0.35682	0	0.531039	0	0	0.618031
C00300	Creatine	1236.29	315.816	1161.43	372.796	783.531	782.278	2484.4	930.853	1311.8	2486.36	650.888	822.368	2561.91	1536.37	300.623	886.026	870.41	2071.16	1519.51	621.669	771.582	1245.26	1317.85	1321.23	1487.03	494.869	829.027	827.805	968.954	601.032
C00791	Creatinine	7.89376	7.85554	7.9122	7.40812	8.08942	10.4619	9.04823	9.32505	8.03454	8.55557	7.21615	9.75258	9.52446	9.82378	7.51993	7.30064	10.162	7.97373	7.24793	6.97365	7.7674	9.23115	8.38971	8.5422	8.46121	0.240682	0.976491	1.06275	1.31577	1.51694
C05824	Cysteine S-sulfate	1.75974	2.77509	2.02482	2.55431	2.1372	1.81777	2.13301	2.79151	3.36662	3.50205	3.59094	7.86603	2.71735	4.16989	5.45631	4.38105	2.33789	1.06267	2.05549	2.26086	2.27849	2.21987	4.58141	4.18115	1.81869	0.467669	0.409406	2.19169	1.12677	0.669779
-	Cysteine-glutathione disulphide	17.3331	32.3569	22.3009	39.7688	18.2346	21.5794	25.4238	78.1082	33.5641	16.7301	8.76429	23.247	18.0052	26.1338	34.5209	18.8912	25.3977	60.4874	17.4768	11.3967	27.9399	35.8365	20.5764	24.3878	34.454	10.0621	28.3338	10.4902	7.67417	22.8908
C00491	Cystine	6.1973	6.43702	5.86314	5.22706	5.12993	5.89324	8.98635	7.09851	6.16821	6.16676	8.24833	4.84347	7.92725	8.39651	15.4004	7.69368	6.01382	3.44795	5.53294	8.57013	5.93113	6.77701	6.35669	9.85447	4.99824	0.525074	1.68112	1.40709	3.70885	1.36395
C00475	Cytidine	7.558	7.05102	7.05267	6.0798	6.34355	8.88008	6.70638	2.3628	7.27799	7.50505	5.13095	6.02499	9.16542	9.84115	6.21914	8.22376	7.97247	0	8.74611	8.31028	6.93537	6.0732	6.48474	8.36237	5.57286	0.618277	2.71536	1.11271	1.57526	4.84171
C04483	DCA	0	0	0	0	0.875113	0	0	0	0	0	0.35626	0.775127	1.33102	0.795907	0	1.6226	0	0	0	0	0	0.218778	0.282847	0.937382	0	0	0.437557	0.368661	0.712548	0
C01571	Decanoate	1.68586	1.0506	1.35392	0	2.20273	0	1.66547	0	1.63533	1.52623	1.78827	1.42962	2.02357	0	0.799785	1.57358	1.40579	1.82915	1.94412	1.45917	1.02259	0.967048	1.59486	1.09923	1.72635	0.729424	1.13799	0.153906	0.890203	0.283508
C00111	DHAP	15.2214	6.50469	17.1875	2.97596	7.86527	18.2404	15.5679	3.78324	5.03909	14.5544	12.0065	7.52915	27.2147	13.8204	4.71676	19.3749	8.05661	2.7543	7.00764	7.86946	10.4724	11.3642	9.7823	16.2817	5.93952	6.82117	6.69991	4.29322	9.46756	2.8079
C06772	Diethanolamine	3.81822	6.05728	5.05148	6.93209	0	0	0	5.87601	6.65461	3.61506	0	14.0019	3.87846	4.78063	4.21578	0	0	4.11655	7.03347	5.59926	5.46477	1.469	6.0679	3.21872	3.71667	1.3399	2.93801	5.94779	2.17785	3.53374
C02678	Dodecanedioate	0	0	0	0	0.211045	0	0	0	0	0	0	0	0	0	0	0	0	0	0	0	0	0.0527612	0	0	0	0	0.105522	0	0	0
C02679	Dodecanoate	8.16136	7.05198	8.05902	5.75225	8.58847	7.50919	7.85799	6.36779	8.42126	9.40331	7.91025	6.96724	9.34479	6.53175	6.83106	8.04891	7.71798	6.01512	8.71495	7.4279	7.25615	7.58086	8.17551	7.68913	7.48268	1.12063	0.92534	1.01623	1.28407	1.36521
C00346	Ethanolamine phosphate	35.6714	23.1928	42.6308	21.3403	31.9973	37.9408	51.6966	58.4326	34.0699	40.7049	33.9089	34.1169	58.1046	36.2467	21.1048	41.6295	33.8617	77.4641	35.9763	32.9169	30.7088	45.0168	35.7001	39.2714	49.1007	10.182	12.168	3.33772	15.269	24.5862
C00354	F1,6P	1.89718	0	2.18039	0	0.560036	1.69572	3.0127	0.839605	0	1.78506	0.799618	0.751013	5.64933	2.43956	0	2.24737	1.04774	0.600845	0.998395	1.8299	1.01939	1.52701	0.833924	2.58407	0.882327	1.18276	1.10201	0.732153	2.32433	0.245016
C00085	F6P	14.9079	2.70226	19.9738	0	7.06523	10.2289	13.3755	35.8545	4.01079	19.4446	6.19121	5.66727	28.1595	10.9577	1.29999	11.6091	14.5803	56.2772	7.07718	5.64467	9.39599	16.631	8.82846	13.0066	25.9782	9.58056	13.072	7.13816	11.1476	26.5065
C00122	Fumarate	12.7296	14.1337	13.0463	13.2038	17.433	13.2695	23.9127	48.8819	22.8026	21.3836	14.9619	15.8832	22.122	14.3045	17.0834	11.2963	15.9208	67.9681	10.7939	10.4961	13.2784	25.8743	18.7578	16.2015	31.5609	0.603383	15.9513	3.9127	4.60038	31.6336
C00103	G1P	6.07579	0	6.03605	0	1.81226	2.85746	4.42448	13.8395	1.67233	6.22219	2.76503	3.0273	8.64021	3.73547	0.891322	3.8749	4.56049	20.6019	3.04898	3.19325	3.02796	5.73343	3.42171	4.28548	9.40379	3.49643	5.50965	1.95702	3.21222	9.72725
C00661	G3P	0	0	0	0	0	0	0	0	0	0	0	0	2.93771	0	0	0	0	0	0	0	0	0	0	0.734427	0	0	0	0	1.46885	0
C00092	G6P	77.3447	15.3636	102.838	9.48572	33.7808	51.2263	65.4084	170.05	24.2118	103.299	35.3221	34.8328	131.155	53.6198	9.06962	60.6182	75.6543	269.689	40.9243	32.1404	51.2581	80.1163	49.4165	63.6156	128.756	46.0954	61.335	36.2857	50.4834	123.281
C00334	GABA	0	0	0	0	0	0	14.5219	14.5366	0	0	0	0	11.0625	0	0	0	0	15.7781	0	0	0	7.26462	0	2.76562	5.25938	0	8.38846	0	5.53125	9.10951
C01181	gamma-Butyrobetaine	1.55662	2.2156	1.90209	2.79189	1.33869	1.82288	2.12159	1.91102	1.34457	1.52376	1.03275	1.40199	1.75247	1.4355	1.37755	1.49673	1.29705	2.20454	1.48387	1.3521	2.11655	1.79854	1.32577	1.51556	1.66182	0.524535	0.331192	0.209146	0.165264	0.479202
C00064	Gln	846.256	827.152	950.408	1019.8	654.866	922.228	1110.74	1243.87	898.986	1010.58	718.627	1043.62	1002.26	953.858	899.413	805.91	825.728	1537.68	745.959	747.668	910.905	982.925	917.953	915.361	1036.46	90.5791	255.43	146.586	84.1978	435.902
C00025	Glu	280.436	119.388	284.956	92.9915	179.199	228.636	437.47	618.363	242.593	319.01	206.051	215.995	425.588	248.742	68.3701	230.89	275.745	1177.7	209.386	208.5	194.443	365.917	245.912	243.398	554.279	102.491	202.121	51.1151	146.074	540.921
C00329	Glucosamine	0	0	0	0	0	0	0	1.56203	0	0	0	1.85904	0	1.51271	1.83497	0	2.71286	4.65342	0	0	0	0.390508	0.46476	0.836919	2.45542	0	0.781015	0.929521	0.975304	2.33737
C00352	Glucosamine 6-phosphate	0	0	0	0	0	0	0	3.10811	0	0	0	0	0	0	0	0	0	15.391	0	0	0	0.777027	0	0	5.13033	0	1.55405	0	0	8.88599
C00191	Glucuronate	3.02612	0	3.60185	5.2109	4.40601	4.1007	5.14825	11.1488	3.78834	3.75009	3.57699	3.82818	3.78311	2.74169	3.89821	3.35254	3.31851	8.20231	2.95201	2.76666	2.95972	6.20095	3.7359	3.44389	4.82428	2.17903	3.32779	0.110634	0.523738	2.9312
C00489	Glutarate	164.321	193.254	150.917	190.761	187.619	229.567	189.774	238.97	266.104	163.343	204.251	224.876	120.655	183.799	192.271	172.454	189.226	154.412	158.028	205.526	174.813	211.483	214.644	167.295	167.222	20.6195	26.6044	42.7889	32.1356	19.1417
C00127	Glutathione(ox)	15.9764	34.417	23.6095	41.0788	15.9187	18.9365	19.988	319.498	41.9522	23.617	7.16754	18.9715	15.8049	17.4673	19.9094	12.8592	32.5581	618.178	16.5927	8.45536	28.7704	93.5852	22.9271	16.5102	222.443	11.161	150.618	14.4504	2.96073	342.81
C00037	Gly	380.143	266.259	491.389	370.165	298.151	430.264	497.737	607.564	264.659	393.753	310.262	356.979	423.92	372.262	271.141	345.462	391.411	742.965	377.503	335.637	376.989	458.429	331.413	353.196	503.96	92.0235	129.446	56.1051	63.6613	207.101
C00093	Glycerophosphate	99.6414	48.5396	117.839	51.8834	81.4825	80.485	160.15	269.321	98.2523	174.051	104.01	92.2621	186.387	127.36	57.7331	99.7079	103.763	437.696	112.721	86.2211	79.4759	147.86	117.144	117.797	218.06	34.6255	89.1611	38.2402	53.9473	190.263
C00670	Glycerophosphorylcholine	262.8	195.168	201.432	159.181	141.181	170.964	123.694	219.271	115.175	175.037	147.951	148.041	234.67	199.207	120.944	123.779	252.294	177.774	202.733	166.929	204.645	163.777	146.551	169.65	210.933	43.0085	41.827	24.4954	56.5027	37.9309
C00160	Glycolate	76.5969	65.3965	68.0409	62.0011	76.9451	60.9139	58.3916	54.5199	56.2559	56.3885	48.0042	48.2357	59.4094	51.6682	48.2249	51.1622	49.6245	57.7318	62.328	52.2541	68.0088	62.6926	52.2211	52.6161	56.5614	6.23627	9.85882	4.73684	4.77649	6.4321
C02037	Gly-Gly	1.58313	0	1.66028	0	0	0	0	0	0	1.9233	0	0	1.93433	0	0	0	0	2.87695	0	1.77432	0.810854	0	0.480826	0.483582	0.958982	0.936823	0	0.961651	0.967164	1.66101
C00581	Guanidinoacetate	4.6011	4.51479	4.97413	3.68516	3.70543	3.69443	3.378	3.85583	2.32951	2.50675	3.06758	2.81038	3.74478	4.39055	3.1289	2.83025	3.05738	5.20983	3.70965	2.82151	4.44379	3.65842	2.67856	3.52362	3.99229	0.543618	0.200924	0.326635	0.692106	1.10371
C17714	Heptanoate	0	0	0	0	0	0	0	0	0	0	0	0	1.3437	0	0	0	0	0	0	0	0	0	0	0.335925	0	0	0	0	0.67185	0
C01585	Hexanoate	1.90329	0	0	0	0	0	4.30987	0	5.26519	2.40636	2.48876	2.48384	5.84972	0	3.7212	1.97877	2.25642	2.82958	1.84659	5.09254	0.475822	1.07747	3.16104	2.88742	2.31087	0.951643	2.15493	1.40328	2.4922	0.493752
C01586	Hippurate	8.32229	13.9738	9.52147	8.2027	8.89176	4.7872	9.44556	10.001	0	0	0	0	0	0	0	0	0	0	0	0	10.0051	8.28139	0	0	0	2.71202	2.37307	0	0	0
C00135	His	136.936	122.314	129.788	132.826	81.9186	99.0136	103.312	135.732	108.327	118.539	102.686	112.977	146.678	125.448	129.444	108.3	126.756	142.937	71.7316	73.9344	130.466	104.994	110.632	127.467	113.808	6.17384	22.4788	6.74475	15.7524	37.3268
C00388	Histamine	2.59673	0	1.23038	0	0.739659	0.806181	0.615177	0	0.593087	0.531467	0.492209	1.002	1.01658	0	0	0.937898	1.37415	0	0	0	0.956777	0.540254	0.654692	0.48862	0.458051	1.23763	0.368767	0.235235	0.565123	0.793368
C01015	Hydroxyproline	18.6969	16.2085	15.4097	14.12	18.2133	23.7444	23.1965	21.3524	14.6062	15.7604	14.637	16.6885	11.5187	17.6885	13.2925	16.0524	24.437	24.5647	19.1175	17.8391	16.1088	21.6266	15.423	14.638	22.7064	1.92806	2.495	1.00007	2.75961	3.10873
C00519	Hypotaurine	26.3547	13.1714	27.5231	15.0807	20.4577	24.8725	28.9155	30.4896	40.3682	40.7252	24.6602	26.1718	42.0748	23.943	14.9446	21.2054	23.4589	50.3739	26.6096	20.3688	20.5325	26.1838	32.9814	25.5419	33.4808	7.45373	4.4911	8.75872	11.6476	14.7144
C00262	Hypoxanthine	54.5401	0	126.298	0	46.1136	104.388	144.499	101.677	10.3893	183.274	23.4342	77.8674	195.973	176.802	3.33618	132.94	89.6761	114.468	72.9016	45.3359	45.2094	99.1694	73.7413	127.263	92.3486	59.8613	40.4277	78.6529	86.7279	20.9118
C00407	Ile	134.871	155.383	136.45	173.219	141.252	123.949	114.449	135.313	138.673	172.867	132.419	203.741	172.582	156.85	183.419	172.556	205.495	130.621	157.478	111.53	149.981	128.741	161.925	171.352	164.531	18.0797	11.9293	33.0635	10.9375	37.9321
C02043	Indolelactate	0.927523	1.75481	1.40044	1.52831	1.26898	1.15032	1.27576	0	0.835929	0.890998	0.960994	1.13282	1.41317	1.13706	1.48654	1.35474	1.2111	0.949688	1.07845	0.990979	1.40277	0.923764	0.955186	1.34788	1.07975	0.349074	0.61853	0.129009	0.150535	0.13071
C00294	Inosine	8.13328	0	37.8302	0	8.10805	28.6399	82.987	52.0518	0	32.4725	6.20623	18.2204	20.5286	30.1165	0	103.794	21.5302	24.4184	21.2832	11.6178	11.4909	42.9467	14.2248	38.6097	22.4106	17.9733	32.1691	14.3246	45.2354	1.74316
C05123	Isethionate	5.05121	4.48724	6.18386	4.93021	5.39751	4.91267	7.68805	5.74392	4.87455	6.85666	5.40834	2.77308	7.49923	4.92883	9.61922	5.90326	6.20169	10.5061	8.33648	6.9244	5.16313	5.93554	4.97816	6.98763	8.34808	0.722379	1.21707	1.69184	2.04951	2.15221
C00311	Isocitrate	10.55	11.839	11.3117	11.5969	10.8045	11.134	14.8393	10.7839	10.2265	10.6506	10.4934	10.5951	9.97539	10.2756	9.26431	10.0114	8.02487	5.44954	9.89064	10.8325	11.3244	11.8904	10.4914	9.88167	7.78835	0.559436	1.97244	0.188197	0.432796	2.22998
C00490	Itaconate	0	0.553386	0	0	0	0	0	0	0	0	0	0	0	0	0.274419	0	0	0	0	0	0.138347	0	0	0.0686048	0	0.276693	0	0	0.13721	0
C00328	Kynurenine	1.56567	0	1.37993	2.4635	0	0	1.46462	6.20996	1.21882	1.08842	1.64408	2.06221	0	0	1.28633	0	1.82227	8.92455	0	1.13705	1.35227	1.91865	1.50338	0.321582	3.58227	1.01813	2.94301	0.441683	0.643164	4.71541
C00186	Lactate	6794.13	8742.06	6342.87	8196.58	4890.73	5117.42	5492.67	6340.29	5787.46	6057.1	5672.87	5099.19	7826.59	6317.53	6639.17	4894.98	4717.68	5735.69	4356.26	5573.28	7518.91	5460.28	5654.15	6419.57	4936.54	1134.86	637.027	403.511	1205.92	715.281
C00123	Leu	276.792	300.707	304.484	362.959	241.15	241.598	261.274	296.466	254.284	348.041	262.345	395.386	327.912	323.524	440.512	370.495	396.503	276.924	271.499	235.745	311.236	260.122	315.014	365.611	314.975	36.5973	25.9826	68.3438	54.242	70.6569
C00047	Lys	958.088	764.46	964.402	1077.58	612.26	798.116	602.061	650.901	1104.1	1432.36	1218.25	1179.72	1394.25	1126.5	1224.91	1309.21	1348.78	1308.97	926.713	989.996	941.133	665.835	1233.61	1263.72	1194.82	129.949	90.6618	140.731	114.663	233.041
C00711	Malate	89.4121	111.487	100.027	85.8315	97.9313	93.2649	145.385	300.183	152.745	144.102	95.8611	98.8825	142.135	95.1584	99.3402	78.1953	102.478	386.052	73.7427	64.8391	96.6894	159.191	122.898	103.707	187.424	11.5609	96.8989	29.711	27.2011	172.616
C00383	Malonate	2.03041	2.41733	1.71676	1.774	3.05274	2.56771	1.99437	2.57446	2.3624	1.59429	1.81919	2.0179	1.62429	1.97858	2.37757	2.37286	1.45263	2.20901	2.03443	1.59288	1.98462	2.54732	1.94844	2.08833	1.89869	0.319081	0.432957	0.325739	0.361475	0.396038
C00073	Met	106.919	74.4124	98.1967	100.157	114.379	115.19	100.287	154.691	98.2941	113.813	119.552	117.49	134.471	97.905	108.519	110.937	137.293	103.916	102.375	79.4367	94.9212	121.137	112.287	112.958	114.528	14.1739	23.3926	9.62605	15.4185	19.7302
C02989	Methionine sulfoxide	5.11773	3.7727	5.16321	4.97056	7.80016	8.06923	6.8638	10.6653	4.74639	4.44022	4.74225	6.14441	4.75801	0	2.52916	4.40998	6.52927	4.6202	3.85237	3.8441	4.75605	8.34962	5.01832	2.92429	5.00061	0.660699	1.62793	0.764292	2.18154	1.3784
C00879	Mucate	1.73021	1.44853	1.82785	2.00148	2.1235	2.28014	2.74892	5.02377	1.87258	1.49868	2.17814	2.28745	2.23326	2.20976	2.03455	1.49315	1.62375	4.09999	1.81021	1.38255	1.75202	3.04408	1.95921	1.99268	2.51132	0.231344	1.34628	0.353679	0.344616	1.37898
C01026	N,N-Dimethylglycine	7.97294	12.1512	7.95603	13.2432	3.97727	8.02438	6.10938	7.54279	3.59181	3.79605	4.28888	3.52746	4.20777	6.22383	4.66449	4.63833	5.98448	4.33214	4.38496	4.35773	10.3309	6.41346	3.80105	4.9336	4.90052	2.76858	1.8164	0.344787	0.885271	0.939102
C03793	N6,N6,N6-Trimethyllysine	1.74924	2.02708	2.00385	1.90168	1.6057	1.65063	1.78204	1.63205	0	1.77773	2.71371	0	2.15787	0	1.4791	0	1.95262	2.3847	1.65338	3.21222	1.92046	1.66761	1.12286	0.909242	1.9969	0.12648	0.078487	1.3517	1.08586	0.367664
C01042	N-Acetylaspartate	7.52749	2.30982	4.28846	1.72608	6.08977	8.43295	95.3831	26.779	13.2638	10.8039	13.332	8.84969	73.5609	19.9923	1.85958	3.57575	3.1054	0.901622	10.4509	4.55185	3.96296	34.1712	11.5624	24.7471	4.81931	2.61714	41.8432	2.15718	33.5532	5.00003
C00140	N-Acetylglucosamine	0	0	0	0	0	0	0	12.9136	0	0	0	0	0	0	0	0	0	21.1534	0	0	0	3.22841	0	0	7.05114	0	6.45682	0	0	12.2129
C04501	N-Acetylglucosamine 1-phosphate	1.66954	1.35533	1.92797	1.27928	1.35744	1.42056	1.62022	4.42224	1.91963	1.70693	1.72696	1.39603	2.3744	1.76218	0.890662	1.59258	2.14208	9.33826	1.49885	1.66356	1.55803	2.20511	1.68739	1.65496	4.3264	0.298933	1.48232	0.216622	0.610227	4.3523
C00357	N-Acetylglucosamine 6-phosphate	1.87338	1.44264	2.45616	1.40502	2.11157	2.35863	2.55545	5.53745	2.28337	1.9491	2.2352	1.93794	2.98256	2.29818	1.34072	2.06242	2.05106	7.79678	1.772	2.27376	1.7943	3.14077	2.1014	2.17097	3.87328	0.489731	1.60807	0.183417	0.677242	3.40071
C00624	N-Acetylglutamate	0.573118	0.533216	0.877737	0.931265	0.991097	0.496195	1.03227	2.61082	1.28902	0.838264	0.742677	0.624228	1.1647	0.711523	0.883147	0.682837	1.07522	4.36071	0.564796	0.554933	0.728834	1.28259	0.873547	0.860552	2.00024	0.204666	0.918374	0.290488	0.221215	2.0601
C02710	N-Acetylleucine	0.438137	0.506803	0.427359	0.813934	0	0	0	0.354026	0.495664	0.416497	0.359751	0.436069	0.617277	0.442971	0.750831	0.460543	0.46161	0	0.367101	0.430827	0.546558	0.0885065	0.426995	0.567905	0.276237	0.18169	0.177013	0.0560647	0.144953	0.243851
C03519	N-Acetylphenylalanine	0	1.07131	0	0.767095	0.569565	0.427011	0.395167	0	0.385685	0	0	0	0	0.336849	0.805755	0	0	0	0.429831	0.326847	0.459601	0.347936	0.0964212	0.285651	0.143277	0.54504	0.244037	0.192842	0.381367	0.248163
C00153	Nicotinamide	8.44631	6.80835	8.84402	4.66638	6.41615	6.79827	13.6391	37.8879	6.57651	11.1916	8.32405	7.21828	13.2359	7.75228	3.77934	6.77379	9.63543	67.6741	7.28997	8.29221	7.19126	16.1854	8.32761	7.88532	28.1998	1.89986	14.8441	2.04119	3.94718	34.2058
C02571	o-Acetylcarnitine	31.0908	32.4644	39.2701	32.9445	32.1319	34.7168	40.905	29.7391	40.9196	39.3607	28.4741	37.4205	44.0564	37.7162	30.4814	37.9852	39.8645	31.0586	38.3809	40.788	33.9425	34.3732	36.5437	37.5598	36.4347	3.6376	4.80556	5.56692	5.55325	4.71454
C06423	Octanoate	0	0	0	0	0	0	0	0	2.12932	0	1.34689	0	2.62813	0	1.60056	1.19425	0	0	0	1.88377	0	0	0.869052	1.35573	0	0	0	1.05311	1.08674	0
C00805	o-Hydroxybenzoate	0	0	0	0	2.42555	0	1.56948	2.49703	0	0	0	0	0	0	0	0	0	0	0	0	0	1.62301	0	0	0	0	1.16118	0	0	0
-	Ophthalmate	0	0	0	0	0	0	0	6.303	0	0	0	0	0	0	0	0	0	6.96274	0	0	0	1.57575	0	0	2.32091	0	3.1515	0	0	4.01994
C00077	Ornithine	232.959	118.342	203.379	179.504	106.359	144.162	151.048	365.27	93.1207	295.426	109.062	136.736	141.607	104.999	124.15	129.035	330.403	248.866	110.147	97.7024	183.546	191.71	158.586	124.948	229.805	48.6584	117.363	92.9888	15.1967	111.359
C00864	Pantothenate	3.76183	2.23064	3.52135	2.66019	4.59707	4.08745	4.22853	4.66972	3.36917	3.26747	2.77949	2.65874	5.02541	3.00185	3.34111	2.95923	2.41231	3.37554	1.88276	1.12396	3.0435	4.39569	3.01872	3.5819	2.55687	0.719261	0.282015	0.351903	0.977389	0.756818
C00811	p-Coumarate	0	3.52274	0	0	2.65969	1.69944	3.70599	3.94235	0	0	0	2.62015	0	0	3.7195	0	0	2.58808	0	0	0.880685	3.00187	0.655038	0.929875	0.862693	1.76137	1.03178	1.31008	1.85975	1.49423
C01601	Pelargonate	2.74637	2.30383	2.12407	2.16742	2.83598	2.88142	2.88704	2.4128	2.10455	2.76775	1.557	2.54441	8.59323	2.508	1.76923	3.01049	1.90215	0	2.73664	2.20992	2.33542	2.75431	2.24343	3.97024	1.54626	0.28447	0.228815	0.534155	3.12387	1.4026
C00803	Pentanoate+3-Methylbutanoate	0	0	0	0	0	0	0	0	0	0	0	0	0	0	0	0	0	9.7484	0	0	0	0	0	0	3.24947	0	0	0	0	5.62824
C00074	PEP	21.8466	10.7886	18.7615	5.58422	8.95222	9.42548	36.6605	49.2196	13.8667	24.354	21.8579	7.77847	31.6758	13.7792	4.82665	15.3176	16.5918	30.7112	12.6046	27.3583	14.2452	26.0644	16.9643	16.3998	19.9692	7.41933	20.1504	7.58352	11.1853	9.51407
C00079	Phe	104.24	104.716	102.047	115.389	85.5855	99.5245	93.1351	102.273	85.3396	91.487	79.3606	107.113	108.626	91.9063	137.458	93.845	101.339	88.4166	71.0254	67.6052	106.598	95.1295	90.8251	107.959	86.9271	5.97492	7.42545	11.9342	21.0359	15.2116
C05598	Phenaceturate	0.998902	1.78223	1.08857	1.95412	2.48455	1.61816	1.83325	4.56424	0.724673	0	0	1.03932	0	0	4.57945	2.82875	1.50385	0	1.76591	1.00207	1.45595	2.62505	0.440999	1.85205	1.08992	0.482526	1.34424	0.525174	2.25483	0.952949
C00588	Phosphorylcholine	15.2576	0	19.4538	0	12.2478	16.9686	28.8967	54.7833	15.3811	15.4974	9.41887	17.2355	28.3598	15.7588	5.79686	14.5981	15.5549	64.5313	11.8592	8.47781	8.67785	28.2241	14.3832	16.1284	30.6485	10.1657	19.0418	3.4165	9.28845	29.4015
C02656	Pimelate	0	1.5843	0.773046	0.959702	0.684718	0	0	0.67911	0.552578	0	0	0.415672	0.334636	0.387563	0.780845	0	0	0.383442	0	0.498865	0.829261	0.340957	0.242063	0.375761	0.127814	0.652668	0.39371	0.285043	0.319958	0.22138
C00408	Pipecolate	2.94184	3.33876	3.21046	3.60215	4.0378	5.60836	3.92502	6.35825	2.45268	1.97907	1.93745	2.2679	2.46055	2.89726	3.77211	2.84323	3.08556	2.98695	2.90032	2.2077	3.2733	4.98236	2.15927	2.99329	2.99095	0.274615	1.19654	0.244655	0.554409	0.0926836
C00148	Pro	255.84	181.8	227.014	245.001	124.253	148.197	135.905	177.966	217.557	228.65	250.663	286.316	283.879	167.875	179.889	203.139	392.103	257.541	209.954	165.475	227.414	146.58	245.796	208.695	286.533	32.6508	23.0948	30.315	52.216	94.4718
C10172	Proline betaine	1.10275	0.86158	0.992302	1.40823	3.83275	4.26869	4.68794	5.28821	0	0	0	0	0	0	0	0	0	0	0	0	1.09121	4.5194	0	0	0	0.233199	0.620169	0	0	0
C00163	Propionate	11.9936	9.40014	8.57215	0	24.912	0	0	9.82114	0	0	0	8.96658	0	13.9725	0	0	0	24.756	0	0	7.49147	8.68328	2.24164	3.49312	8.252	5.20263	11.7681	4.48329	6.98623	14.2929
C00022	Pyruvate	109.914	329.494	90.9008	242.728	122.909	104.657	65.7071	44.8355	142.65	54.8303	223.235	76.2851	81.2947	71.514	232.205	88.6929	63.6381	26.994	110.788	99.5933	193.259	84.527	124.25	118.427	67.1402	113.182	35.6276	75.8424	76.1778	42.0069
C00117	R5P	0	0	4.65336	2.52381	3.66697	7.60303	16.1934	5.47181	4.34671	12.1724	9.36552	0	7.27238	6.61144	4.30426	18.225	4.49144	3.21574	7.78958	8.19827	1.79429	8.23381	6.47115	9.10328	5.16559	2.24688	5.54491	5.39353	6.21284	2.36026
C00199	Ru5P	11.261	7.38142	20.0388	10.2594	13.2101	25.5583	61.0296	34.2466	19.927	37.5505	24.7561	17.7752	20.9855	29.3059	13.6963	67.2424	20.2541	21.6637	31.6846	34.6556	12.2351	33.5111	25.0022	32.8075	24.5341	5.45612	20.2747	8.86014	23.8259	6.23246
C05382	S7P	7.96974	2.89485	14.2351	3.41334	8.46609	15.6659	27.5798	44.9979	6.50906	21.6542	9.07394	8.67784	14.8873	18.1712	3.06175	23.8411	14.5466	116.669	13.6063	13.2073	7.12827	24.1774	11.4788	14.9903	48.2741	5.25795	15.962	6.87668	8.77033	59.234
C00818	Saccharate	0.837268	0.674671	0.952714	1.10246	0.59499	0.698236	0.832521	1.22507	0	0	0.739402	0	0.524554	0.339688	0.677106	0	0	0.777158	0.575009	0	0.891778	0.837704	0.18485	0.385337	0.450722	0.180929	0.275946	0.369701	0.291593	0.403211
C00213	Sarcosine	0	0	0	5.40003	0	0	0	5.65577	0	0	0	0	0	0	0	0	0	0	0	0	1.35001	1.41394	0	0	0	2.70001	2.82789	0	0	0
C08277	Sebacate	0.202415	0.199553	0.164719	0	0	0.196532	0.161218	0.223426	0	0	0	0.137654	0.160116	0	0.191083	0	0	0.186462	0	0	0.141672	0.145294	0.0344134	0.0877999	0.062154	0.0959897	0.100156	0.0688268	0.102168	0.107654
C00065	Ser	305.07	202.915	332.7	277.123	183.72	265.41	257.835	227.173	221.501	309.707	264.071	293.93	308.567	277.887	252.746	282.583	371.764	306.454	275.718	229.66	279.452	233.534	272.302	280.446	317.979	55.8422	37.0968	38.7959	22.8706	49.0489
C00780	Serotonin	5.93419	15.0012	8.55613	10.7017	7.4606	10.5059	4.23134	5.83233	7.36778	4.62241	3.05043	7.88868	5.98488	7.95372	11.9708	5.25115	6.69048	2.80359	5.15878	3.2367	10.0483	7.00755	5.73232	7.79014	4.88428	3.83454	2.67908	2.29122	3.01165	1.95793
C00315	Spermidine	0.648828	0.471661	0.898078	0.406797	0.65603	1.16482	1.50928	5.05349	0.96803	0.996187	0.628974	0.859655	1.72681	1.20159	0.542305	0.711779	0.964143	6.50722	0.742502	0	0.606341	2.09591	0.863212	1.04562	2.73795	0.219751	2.00263	0.166882	0.533267	3.26616
C00042	Succinate	55.8067	161.86	59.9346	169.756	47.5728	42.4004	78.4354	104.379	149.664	50.6649	32.3468	34.9825	79.4667	45.8961	162.382	35.3297	38.449	77.8224	25.3009	36.8285	111.839	68.1969	66.9145	80.7686	47.1908	62.4237	28.8951	55.7556	57.5708	27.3303
C00898	Tartrate	0	0	0	0	0	0	0	0	5.98427	7.05248	19.4725	16.6337	11.2585	3.70707	16.9587	13.787	8.01725	4.24192	5.6532	4.97791	0	0	12.2858	11.4278	5.97079	0	0	6.77374	5.65081	1.90759
C00245	Taurine	1209.44	689.761	1190.5	654.504	1016.57	993.392	1598.67	1207.3	1314.43	1609.08	825.855	1129.72	1658.98	1332.45	729.247	1054.6	1139.15	2189.54	1284.67	864.159	936.05	1203.98	1219.77	1193.82	1537.79	305.184	280.036	328.535	396.148	569.104
C05122	Taurocholate	1.35636	0.8168	1.59588	0.730222	1.01303	1.31215	0.819222	11.7262	1.36769	0.669382	0.854968	2.50937	1.17012	1.28416	0	0.994233	2.76016	21.0298	3.70871	1.71309	1.12481	3.71765	1.35035	0.862126	9.16622	0.418764	5.34287	0.827196	0.586992	10.2851
C06337	Terephthalate	0.687388	0.914027	0.769182	0.532287	0.491736	0	0.639136	0.565423	0.682999	0.665416	0.673045	0.638678	0.871114	1.10069	0.580082	0.679662	0.710403	0	0.649243	0.372973	0.725721	0.424074	0.665035	0.807886	0.453215	0.159409	0.289049	0.0189885	0.22954	0.393685
C00188	Thr	405.652	296.614	348.208	441.907	293.651	342.78	327.208	317.604	473.29	444.303	512.818	559.012	507.083	426.3	446.263	466.749	575.251	532.684	431.516	408.353	373.095	320.311	497.356	461.599	513.151	63.9368	20.5795	49.7808	34.5279	73.8316
C01620	Threonate	34.3401	31.9718	39.4551	38.6783	39.891	48.8365	45.8446	68.3027	40.0328	36.9015	45.9693	41.7812	52.8481	42.9441	29.5776	32.3901	49.7889	64.0392	43.5955	44.8756	36.1113	50.7187	41.1712	39.44	52.4745	3.56101	12.2982	3.78244	10.6305	10.4831
C02341	trans-Aconitate	1.32398	3.72353	1.51247	1.82116	1.53638	2.47498	1.64601	4.88347	1.28476	0	2.10063	2.69586	0	1.17178	3.01514	1.15157	2.44568	1.70455	2.03127	1.09675	2.09529	2.63521	1.52031	1.33462	2.0605	1.10467	1.55631	1.16698	1.24705	0.371429
C00689	Trehalose 6-phosphate	0	0	0	0	0.641592	0	0	0	1.04387	0	0	0	0	0	0	0	0	2.02183	0	0	0	0.160398	0.260966	0	0.673942	0	0.320796	0.521933	0	1.1673
C01004	Trigonelline	5.04431	4.92398	4.48542	4.5021	4.6726	5.75198	5.46658	6.95357	0	0	0	0	0	0	0	0	0	0	0	0	4.73895	5.71118	0	0	0	0.287436	0.945809	0	0	0
C01104	Trimethylamine N-oxide	18.2348	41.6354	29.6608	24.8382	27.4	13.9373	36.4218	29.3644	11.7776	10.2305	4.87606	10.5469	15.2139	38.1964	30.9974	11.2741	7.03114	6.64861	3.32483	3.72267	28.5923	26.7809	9.35775	23.9205	5.66819	9.87648	9.39791	3.06142	12.7752	2.0384
C00078	Trp	139.424	150.394	123.266	180.733	136.885	146.008	128.829	173.787	95.3556	126.41	138.051	172.481	106.891	139.37	151.485	124.373	173.681	131.096	188.902	157.984	148.454	146.377	133.074	130.529	164.559	24.2325	19.5743	31.858	19.2698	29.9633
C00082	Tyr	151.016	134.025	153.085	190.491	134.092	203.076	128.512	86.323	190.919	166.958	181.389	191.705	194.338	168.772	219.389	167.817	258.099	71.7355	169.403	129.44	157.154	138.001	182.743	187.579	166.413	23.8085	48.3414	11.5208	24.5072	93.2179
C00029	UDP-glucose	0	0	0	0	0	0	0	1.37262	0	0	0	0	0	0	0	0	0	1.46089	0	0	0	0.343154	0	0	0.486963	0	0.686308	0	0	0.843444
C00106	Uracil	0	0	0	0	0	9.71531	11.6063	29.3142	0	0	0	0	0	0	0	0	0	38.5225	0	0	0	12.6589	0	0	12.8408	0	12.2123	0	0	22.241
C00366	Urate	119.882	112.07	108.257	127.543	79.6717	82.0773	81.6052	141.62	120.84	70.9569	80.2643	85.5357	85.1777	77.6611	158.666	73.2786	95.3811	226.972	89.1602	79.2617	116.938	96.2435	89.3993	98.696	137.171	8.56698	30.2687	21.81	40.2811	77.8318
C00086	Urea	5227.54	5792.22	6112.24	6933.57	7329.39	5422.13	6681.66	7568.33	6363.97	6578.52	6191.44	7232.13	7305.2	5998.52	8207.76	5282.42	9934.67	5251.05	5428.42	4236.56	6016.39	6750.38	6591.52	6698.48	6871.38	712.493	961.469	455.482	1309.1	2654.37
C00299	Uridine	27.2185	32.7231	33.5828	36.6034	26.0448	36.3335	38.3313	75.5617	26.755	28.1018	22.4018	35.2549	27.7541	36.9527	35.2347	33.5165	41.306	82.0067	35.871	30.3589	32.532	44.0678	28.1284	33.3645	53.0612	3.91366	21.675	5.33753	3.99467	25.2144
C00785	Urocanate	1.93802	0	2.06579	1.14517	0	1.52124	0	1.64026	3.91183	0	1.7836	1.60212	2.53401	2.46913	0	2.21299	1.52164	0	2.03374	0	1.28725	0.790377	1.82439	1.80403	1.18513	0.949884	0.913941	1.60591	1.21065	1.05781
C00183	Val	380.104	382.157	385.069	478.689	352.707	331.538	324.487	373.883	427.496	474.843	421.421	564.449	466.304	434.892	508.976	425.127	599.601	379.777	448.117	343.614	406.505	345.654	472.052	458.825	475.832	48.1658	22.3152	66.0652	37.7686	112.502
C00385	Xanthine	99.0875	0	130.547	0	61.039	105.261	110.31	136.04	36.7522	142.403	45.3505	93.6874	131.682	120.037	13.9137	93.0864	131.13	214.209	96.9126	62.2856	57.4086	103.163	79.5484	89.6797	147.417	67.5225	31.1492	48.8251	53.0341	60.3208
C01762	Xanthosine	0	0	7.77745	0	0	7.75895	0	7.84915	0	8.17238	0	11.5249	10.2633	10.8446	0	7.68628	9.32009	18.4985	7.33398	5.36454	1.94436	3.90203	4.92431	7.19854	11.7175	3.88873	4.50582	5.84851	4.99143	5.95589
C02918	1-Methylnicotinamide	0	0	0	0	0	0	0.72426	0.805881	0	0	0	0	0	0	0	0	0	1.26563	0	0	0	0.382535	0	0	0.421877	0	0.442969	0	0	0.730713
C01159	2,3-DPG	0	0	0	0	0	0	0	0	0	0	0	0	0	0	0	0	0	0	0	2.35829	0	0	0	0	0	0	0	0	0	0
C02356	2AB	6.73744	7.32287	5.62314	8.47744	10.1659	9.01049	9.83267	19.1854	16.9751	19.2043	19.5051	32.616	11.5824	19.2362	15.7319	17.8397	22.7636	44.7892	11.4506	20.9458	7.04022	12.0486	22.0751	16.0975	26.3345	1.18958	4.78256	7.11726	3.33701	16.9538
C06369	2-Deoxyglucose 6-phosphate	0	0	0	0	0	0	0	0	2.89619	0	0	0	0	0	0	0	0	0	0	0	0	0	0.724047	0	0	0	0	1.44809	0	0
C00672	2-Deoxyribose 1-phosphate	0	0	0	0	0	1.07735	0	0	0.835985	0	0.586637	0	2.85228	1.01288	0	0	0	0	0	0	0	0.269338	0.355656	0.96629	0	0	0.538677	0.423104	1.34493	0
C05984	2-Hydroxybutyrate	7.14609	16.9895	7.76925	18.4239	24.9	7.56319	17.5836	27.9493	37.8148	19.7637	14.7768	24.8621	10.7698	21.5698	28.7373	17.0089	15.2429	33.6145	9.73242	24.4326	12.5822	19.499	24.3043	19.5214	19.53	5.95163	9.06847	9.90345	7.57259	12.5049
C02630	2-Hydroxyglutarate	2.07804	1.84167	2.11519	2.17946	2.00174	2.46974	2.13179	3.29323	2.32136	1.67553	1.67029	1.51355	1.9931	1.88899	1.98311	1.9141	2.02905	1.25145	1.55112	2.20819	2.05359	2.47412	1.79518	1.94483	1.61054	0.147362	0.580599	0.358748	0.0511784	0.392187
-	2-Hydroxyisobutyrate	3.01051	2.36239	2.95715	3.16934	3.81477	4.0644	2.90681	4.41386	7.44395	8.01128	8.05505	9.49675	8.4907	6.4683	7.74562	6.04603	9.66708	10.0598	12.7233	9.32272	2.87485	3.79996	8.25176	7.18766	10.8167	0.353327	0.644139	0.875418	1.1299	1.66278
-	2-Hydroxypentanoate	1.77953	0	2.1051	2.15643	3.09487	2.81176	3.21772	5.11638	3.53546	4.11465	2.77784	3.50622	2.81485	2.33724	3.18014	3.03135	3.40431	6.43403	3.75572	3.27778	1.51026	3.56018	3.48354	2.8409	4.53135	1.02058	1.0513	0.547574	0.367744	1.6571
C00026	2-Oxoglutarate	29.9757	49.7761	38.8586	38.5603	43.2266	42.1608	33.045	26.4265	44.994	31.2549	38.2889	28.7833	38.4396	34.3641	56.0057	28.9996	27.7361	18.5892	35.1879	29.3952	39.2927	36.2147	35.8303	39.4523	27.1711	8.11242	7.96614	7.31693	11.6932	8.31378
C00141	2-Oxoisopentanoate	7.10157	5.95298	8.69576	5.14496	9.85877	7.82077	7.96954	7.16016	8.68147	9.62629	11.8301	9.97874	12.4027	9.87682	6.70493	10.034	7.15585	4.10043	10.7861	8.4987	6.72382	8.20231	10.0291	9.75462	7.34748	1.54037	1.15898	1.31966	2.33852	3.34698
C00631	2PG	4.40724	1.94864	4.22612	1.47416	2.21738	2.48487	10.4391	11.7446	3.12673	6.81775	4.95782	1.44205	7.90558	3.46023	1.48413	3.87869	3.7564	9.93402	3.06327	8.03914	3.01404	6.7215	4.08609	4.18216	5.58456	1.51838	5.07571	2.31899	2.69299	3.78265
C01744	3-(4-Hydroxyphenyl)propionate	0	0	0	0	3.0221	0	3.43169	3.26499	0	0	0	0	0	0	0	0	0	0	0	0	0	2.4297	0	0	0	0	1.6285	0	0	0
C05145	3-Aminoisobutyrate	0	0	0	0	0	0	0	2.12451	0	0	0	0	0	0	0	0	0	3.38414	0	0	0	0.531126	0	0	1.12805	0	1.06225	0	0	1.95383
C03761	3-Hydroxy-3-methylglutarate	0	1.01932	0	0	0	0	1.72309	2.80804	2.61395	1.41568	0	1.67159	1.07399	1.81588	1.59836	1.1574	0	2.08203	0	1.73996	0.254829	1.13278	1.4253	1.41141	0.694011	0.509658	1.38098	1.08091	0.354455	1.20206
C01089	3-Hydroxybutyrate	86.57	148.432	128.001	161.949	500.723	358.123	483.305	368.719	675.45	476.933	277.211	415.33	404.042	785.854	543.84	679.584	402.784	912.806	781.517	1293.08	131.238	427.718	461.231	603.33	699.036	32.8863	74.7082	165.436	165.715	264.826
-	3-Indoxyl sulfate	10.6401	17.3929	12.5009	14.7274	39.4172	16.098	24.1881	31.4899	12.2766	7.51754	10.2152	14.2991	5.6221	6.28463	12.4092	12.4675	8.16217	4.95676	8.9553	5.75748	13.8153	27.7983	11.0771	9.19586	7.35808	2.91208	9.97589	2.90018	3.75394	2.11707
C01152	3-Methylhistidine	3.74304	3.11944	3.7672	4.56717	4.94787	7.84842	6.12369	6.42177	4.65287	4.43065	4.22015	6.27561	3.63242	4.8705	4.48834	3.56537	5.58804	4.98855	4.84133	4.19943	3.79921	6.33544	4.89482	4.13916	5.13931	0.593307	1.19258	0.937327	0.643637	0.395524
C00197	3PG	39.821	19.7407	39.0205	9.20864	16.4682	21.1613	82.7917	115.988	28.5943	52.0685	45.2039	16.3553	74.3277	28.0921	9.39805	29.7204	34.5837	75.3203	27.4465	68.1041	26.9477	59.1023	35.5555	35.3846	45.7835	15.0343	48.4918	16.1542	27.5507	25.8273
C02642	3-Ureidopropionate	7.70576	9.22646	7.13736	17.3399	16.4917	11.9741	8.17899	12.1932	16.2124	15.9882	14.5426	32.6578	8.08663	4.85113	10.9084	14.7215	10.2987	19.0132	10.1579	11.8818	10.3524	12.2095	19.8502	9.6419	13.1566	4.74111	3.39793	8.57035	4.19429	5.07247
C00233	4-Methyl-2-oxopentanoate	21.1303	17.5588	24.5869	11.6092	25.0591	20.2188	31.904	33.6849	25.7235	31.3343	25.7004	28.7443	37.6395	25.2006	14.6494	27.7478	21.3455	13.5745	27.8359	18.351	18.7213	27.7167	27.8756	26.3094	20.9186	5.54199	6.22989	2.71294	9.44501	7.14028
C00847	4-Pyridoxate	0	0.255329	0.210225	0.254136	0	0	0.152865	0.343082	0.14497	0	0	0	0	0	0.230611	0	0	0.281689	0	0	0.179923	0.123987	0.0362426	0.0576527	0.0938963	0.121771	0.162872	0.0724852	0.115305	0.162633
C00431	5-Aminovalerate	0	0	0	0	0	0	0	4.30053	0	0	0	0	0	0	0	0	0	0	0	0	0	1.07513	0	0	0	0	2.15027	0	0	0
C01879	5-Oxoproline	30.4748	18.0494	29.8176	19.1337	31.0242	31.0766	38.1161	66.6204	36.4074	36.9464	23.1685	32.1085	39.0906	32.1426	13.1994	26.1595	27.0576	67.4614	25.4366	24.886	24.3689	41.7093	32.1577	27.648	39.9852	6.69111	16.9381	6.37183	10.9865	23.8089
C00345	6-Phosphogluconate	1.44329	1.49798	1.56547	0.760505	0.917272	0.797597	1.83752	3.25503	1.06604	1.73886	2.33624	1.02	1.52005	1.20929	1.34952	1.29565	2.04757	5.86375	1.67438	8.0948	1.31681	1.70185	1.54029	1.34363	3.19523	0.374223	1.1349	0.624121	0.131029	2.31852
# MasterHands Ver.2.18.0.2
# Engine Ver.1.48

## Sheet: Table S7
Supplementary Table 7: B vitamin metatranscriptome.
Relative abundance of transcripts mapping to bacterial genes involved in synthesis (S) or downstream utilisation (D) of enzymes involved in B vitamin metabolism in cecal contents of specific-pathogen-free (SPF) mice fed an inulin-supplemented (IN), fiber-rich 2 (FR2), or fiber-free (FF) diet.
					Inulin-supplemented				Fiber-rich 2				Fiber-free
Vit	Abbrev	Role	Uniref	Taxon	IN2	IN5	IN7	IN8	LD1	LD2	LD3	LD7	MD425	MD426	MD466	MD467
B1	ThiG	S	UniRef50_A1S6Q5: Thiazole synthase	g__Bacteroides.s__Bacteroides_caecimuris	0.0255633	0.0712144	0.162743	0	0.0653069	0.0248682	0	0	0.19913	0.0245898	0.312641	0.340513
B1	ThiG	S	UniRef50_A1S6Q5: Thiazole synthase	g__Bacteroides.s__Bacteroides_uniformis	2.79253	0.676672	0.477052	1.57489	0	0.171358	0	0	0.756026	0.724783	0.367264	1.03349
B1	ThiG	S	UniRef50_A1S6Q5: Thiazole synthase	g__Desulfovibrionaceae_unclassified.s__Desulfovibrionaceae_bacterium	0	0	0	0	0	0	0	0	0	0.364158	0.091067	0.196474
B1	ThiG	S	UniRef50_A1S6Q5: Thiazole synthase	g__Dorea.s__Dorea_sp_5_2	0.154041	0.143009	0.0653778	0.224784	0.0983826	0	0	0	0.0571512	0.222262	0.0627977	0.371172
B1	ThiG	S	UniRef50_A1S6Q5: Thiazole synthase	g__Eubacterium.s__Eubacterium_plexicaudatum	0	0	0	0	0	0	0.0335655	0	0	0	0	0
B1	ThiG	S	UniRef50_A1S6Q5: Thiazole synthase	g__Mucispirillum.s__Mucispirillum_schaedleri	0.229087	0.0466505	0.064819	0.063675	1.268	0.817143	1.14611	2.05195	4.13342	5.214	5.292	4.75532
B1	ThiG	S	UniRef50_A1S6Q5: Thiazole synthase	g__Muribaculaceae_unclassified.s__Muribaculaceae_bacterium_DSM_103720	0.0509082	0	0	0.222863	0.617765	0.668537	0.741646	2.37537	0.339977	0.146908	0	0
B1	ThiG	S	UniRef50_A1S6Q5: Thiazole synthase	g__Muribaculum.s__Muribaculum_intestinale	3.00365	2.93028	5.42529	3.4358	1.63966	0.174828	2.03836	2.63904	0.114302	0	0	0.0285517
B1	ThiG	S	UniRef50_A1S6Q5: Thiazole synthase	g__Prevotella.s__Prevotella_sp_MGM2	0.126729	0.282433	0.968147	0.348722	0	0.0492433	0	0	0.112843	0	0.433928	0.111635
B1	ThiG	S	UniRef50_A1S6Q5: Thiazole synthase	TOTAL	6.38251	4.15026	7.16343	5.87073	3.68911	1.90598	3.95968	7.67121	5.71285	6.6967	6.5597	6.83716
B1	ThiG	S	UniRef50_A1S6Q5: Thiazole synthase	unclassified	0	0	0	0	0	0	0	0.604857	0	0	0	0
B1	ThiG	S	UniRef50_A5Z7Z3: Thiazole biosynthesis protein ThiG	TOTAL	4.07612	2.08567	4.1226	0	0	0.814726	0.589399	0	0	1.97817	1.05414	0.820714
B1	ThiG	S	UniRef50_A5Z7Z3: Thiazole biosynthesis protein ThiG	unclassified	4.07612	2.08567	4.1226	0	0	0.814726	0.589399	0	0	1.97817	1.05414	0.820714
B1	ThiC	S	UniRef50_A5ZMJ7: Thiamine biosynthesis protein ThiC	TOTAL	11.8575	7.48245	4.54575	6.51781	0.687107	1.30096	1.11447	0.952686	4.40088	6.57769	7.56718	3.53845
B1	ThiC	S	UniRef50_A5ZMJ7: Thiamine biosynthesis protein ThiC	unclassified	11.8575	7.48245	4.54575	6.51781	0.687107	1.30096	1.11447	0.952686	4.40088	6.57769	7.56718	3.53845
B1	ThiM	S	UniRef50_B2UP55: Hydroxyethylthiazole kinase	g__Akkermansia.s__Akkermansia_muciniphila	0	0	0	0	0.308027	0	0	0	0	0	0	0
B1	ThiM	S	UniRef50_B2UP55: Hydroxyethylthiazole kinase	TOTAL	0	0	0	0	0.308027	0	0	0	0	0	0	0
B1	ThiD	S	UniRef50_B5CLH5: Phosphomethylpyrimidine kinase	TOTAL	1.3109	1.14123	0	0	0	0	0	0	0	0	0	0
B1	ThiD	S	UniRef50_B5CLH5: Phosphomethylpyrimidine kinase	unclassified	1.3109	1.14123	0	0	0	0	0	0	0	0	0	0
B1	--	D	UniRef50_B6FIW3: Thiamine pyrophosphate enzyme, C-terminal TPP binding domain protein	unclassified	22.4684	19.785	19.1048	18.4354	5.08448	6.28073	4.35095	7.39793	25.9238	18.5139	34.3549	20.2256
B1	ThiM	S	UniRef50_B6GC61: Putative hydroxyethylthiazole kinase (Fragment)	TOTAL	0	0.513386	0	0	0	0	0	0	0.822038	0	0	0
B1	ThiM	S	UniRef50_B6GC61: Putative hydroxyethylthiazole kinase (Fragment)	unclassified	0	0.513386	0	0	0	0	0	0	0.822038	0	0	0
B1	ThiS	S	UniRef50_C0C4N8: Thiamine biosynthesis protein ThiS	TOTAL	0.313487	0.579952	0	0.260643	0	0	0	0	0	0	0	0
B1	ThiS	S	UniRef50_C0C4N8: Thiamine biosynthesis protein ThiS	unclassified	0.313487	0.579952	0	0.260643	0	0	0	0	0	0	0	0
B1	ThiM	S	UniRef50_C0ESE0: Hydroxyethylthiazole kinase (Fragment)	TOTAL	5.85891	2.4659	4.22753	2.41255	0	0.533957	0.246497	0	2.05051	1.59803	0.668987	0.604584
B1	ThiM	S	UniRef50_C0ESE0: Hydroxyethylthiazole kinase (Fragment)	unclassified	5.85891	2.4659	4.22753	2.41255	0	0.533957	0.246497	0	2.05051	1.59803	0.668987	0.604584
B1	--	D	UniRef50_C2L158: Thiamine pyrophosphate enzyme, C-terminal TPP binding domain protein (Fragment)	unclassified	0	0.772079	0	0.862996	0	0	0	0	1.93467	1.6467	0.980847	1.19596
B1	ThiG	S	UniRef50_C3QZ05: Thiazole biosynthesis protein ThiG	TOTAL	7.30444	2.41218	3.81893	4.38225	6.41742	3.43256	3.38085	8.12584	3.24443	2.34362	1.12737	2.3178
B1	ThiG	S	UniRef50_C3QZ05: Thiazole biosynthesis protein ThiG	unclassified	7.30444	2.41218	3.81893	4.38225	6.41742	3.43256	3.38085	8.12584	3.24443	2.34362	1.12737	2.3178
B1	ThiD	S	UniRef50_D4IWA1: Phosphomethylpyrimidine kinase	TOTAL	0	0	0	0.332683	0	0	0	0	0.190694	0	0	0
B1	ThiD	S	UniRef50_D4IWA1: Phosphomethylpyrimidine kinase	unclassified	0	0	0	0.332683	0	0	0	0	0.190694	0	0	0
B1	ThiM	S	UniRef50_D6DI51: Hydroxyethylthiazole kinase	TOTAL	0	0	0	2.6954	0	0	0	0	0	0	0	0
B1	ThiM	S	UniRef50_D6DI51: Hydroxyethylthiazole kinase	unclassified	0	0	0	2.6954	0	0	0	0	0	0	0	0
B1	--	D	UniRef50_E0RVT4: Thiamine pyrophosphate enzyme	unclassified	0	0	0	0	0	1.09076	0	0	0	0	0	0
B1	--	D	UniRef50_E4LC49: Thiamine pyrophosphate enzyme, N-terminal TPP binding domain protein	unclassified	1.63368	2.12577	1.12618	0.83348	2.04009	1.88524	1.94384	2.21622	1.73936	3.43667	1.90313	2.7438
B1	--	D	UniRef50_F5T3H2: Transketolase, thiamine diphosphate binding domain protein	unclassified	0	0	0	0	0	1.1548	0	0	0	0	0	0
B1	--	D	UniRef50_F5T3X0: Thiamine pyrophosphate enzyme, N-terminal TPP binding domain protein	unclassified	0	0	0	0	4.2272	2.53595	2.40914	2.52681	1.98731	2.53789	2.47983	0
B1	ThiH	S	UniRef50_F9N3Q1: Thiazole biosynthesis protein ThiH	TOTAL	0.832621	0.922341	0	1.02867	1.35086	1.6284	1.26539	1.26809	2.08027	2.34973	1.73546	1.13121
B1	ThiH	S	UniRef50_F9N3Q1: Thiazole biosynthesis protein ThiH	unclassified	0.832621	0.922341	0	1.02867	1.35086	1.6284	1.26539	1.26809	2.08027	2.34973	1.73546	1.13121
B1	ThiH	S	UniRef50_F9PPZ7: Thiazole biosynthesis protein ThiH domain protein	TOTAL	1.6988	1.25095	1.98861	0	0	0.27637	0	0	0	0.117924	0	0.523357
B1	ThiH	S	UniRef50_F9PPZ7: Thiazole biosynthesis protein ThiH domain protein	unclassified	1.6988	1.25095	1.98861	0	0	0.27637	0	0	0	0.117924	0	0.523357
B1	ThiM	S	UniRef50_G4KYY0: Hydroxyethylthiazole kinase	g__Oscillibacter.s__Oscillibacter_sp_1_3	0	0	0	0	0	0	0	0	1.25498	0.61264	0	0
B1	ThiM	S	UniRef50_G4KYY0: Hydroxyethylthiazole kinase	TOTAL	0	0	0	0.631708	0	0	0	0	1.25498	0.61264	0	0
B1	ThiM	S	UniRef50_G4KYY0: Hydroxyethylthiazole kinase	unclassified	0	0	0	0.631708	0	0	0	0	0	0	0	0
B1	ThiD	S	UniRef50_H1D457: Phosphomethylpyrimidine kinase	TOTAL	0	0	0	0	0	0	0	0	0	0.266638	0	0
B1	ThiD	S	UniRef50_H1D457: Phosphomethylpyrimidine kinase	unclassified	0	0	0	0	0	0	0	0	0	0.266638	0	0
B1	ThiH	S	UniRef50_J9CMX7: Thiamine biosynthesis protein ThiH	TOTAL	1.49236	1.72409	2.13899	0.835242	1.01152	0.985693	2.62803	0.595232	0.87107	1.67201	1.51861	1.28802
B1	ThiH	S	UniRef50_J9CMX7: Thiamine biosynthesis protein ThiH	unclassified	1.49236	1.72409	2.13899	0.835242	1.01152	0.985693	2.62803	0.595232	0.87107	1.67201	1.51861	1.28802
B1	--	D	UniRef50_J9FR37: Thiamine-phosphate diphosphorylase (Fragment)	unclassified	0	0	0	0	0	0	0	0	0.31154	0	0	0
B1	ThiD	S	UniRef50_J9G6F3: Phosphomethylpyrimidine kinase	TOTAL	3.38942	2.24696	1.62705	5.56023	0	0	0.33881	0	0.640836	0	0	0
B1	ThiD	S	UniRef50_J9G6F3: Phosphomethylpyrimidine kinase	unclassified	3.38942	2.24696	1.62705	5.56023	0	0	0.33881	0	0.640836	0	0	0
B1	--	D	UniRef50_J9GHU0: Thiamine pyrophosphate protein domain protein TPP-binding protein (Fragment)	unclassified	0	0	0	0	0.836848	0.962401	0.430905	0.831281	0	0	0	0
B1	--	D	UniRef50_K1RHI4: Protein containing Thiamine pyrophosphate enzyme	unclassified	0	1.23114	8.31416	2.92335	1.11537	0.985782	1.38622	0.552892	0	0	0.896177	0.584311
B1	--	D	UniRef50_K1RZR6: Thiamine pyrophosphate protein TPP binding domain protein (Fragment)	unclassified	0	0	0	0	0	1.84519	0	0	0	0	0	0
B1	ThiE	S	UniRef50_K1S9K0: Thiamine phosphate pyrophosphorylase (Fragment)	TOTAL	0	0	0	0.63009	0	0	0	0	0	0	0	0.814478
B1	--	D	UniRef50_K1S9K0: Thiamine phosphate pyrophosphorylase (Fragment)	unclassified	0	0	0	0.63009	0	0	0	0	0	0	0	0.814478
B1	ThiL	D	UniRef50_K1SDZ3: Thiamine biosynthesis/tRNA modification protein ThiI	TOTAL	5.25316	9.18026	0	2.19797	3.4331	6.58889	3.23702	2.33206	3.15156	5.15589	4.45083	5.5094
B1	ThiL	D	UniRef50_K1SDZ3: Thiamine biosynthesis/tRNA modification protein ThiI	unclassified	5.25316	9.18026	0	2.19797	3.4331	6.58889	3.23702	2.33206	3.15156	5.15589	4.45083	5.5094
B1	ThiH	S	UniRef50_K1SFR9: Thiazole biosynthesis protein ThiH	TOTAL	7.92955	4.04504	4.9263	3.15631	6.94468	3.67859	2.92152	9.94893	3.68792	1.89224	0.917013	1.62801
B1	ThiH	S	UniRef50_K1SFR9: Thiazole biosynthesis protein ThiH	unclassified	7.92955	4.04504	4.9263	3.15631	6.94468	3.67859	2.92152	9.94893	3.68792	1.89224	0.917013	1.62801
B1	--	D	UniRef50_K1SWG8: Protein containing Thiamine pyrophosphate enzyme, central region domain protein (Fragment)	unclassified	9.06653	22.1529	2.68567	3.50792	13.4561	17.0549	7.17225	10.5432	6.81907	16.7037	12.7634	9.38531
B1	--	D	UniRef50_K1SWH8: Protein containing Translation initiation factor IF-2 (Fragment)	unclassified	3.07963	0.728211	0.882432	1.01139	1.15766	1.13867	0.119514	0.943153	5.47058	4.77566	7.31548	5.02949
B1	ThiL	D	UniRef50_K1SYG1: Thiamine-phosphate kinase (Fragment)	TOTAL	0.376153	0.854264	1.00046	0.59828	3.57599	2.65617	2.53086	3.88913	3.53627	1.28117	1.67029	1.40434
B1	ThiL	D	UniRef50_K1SYG1: Thiamine-phosphate kinase (Fragment)	unclassified	0.376153	0.854264	1.00046	0.59828	3.57599	2.65617	2.53086	3.88913	3.53627	1.28117	1.67029	1.40434
B1	ThiL	D	UniRef50_K1SZH1: Thiamine-monophosphate kinase (Fragment)	TOTAL	0.63974	1.42902	0.946699	0.994919	4.24095	3.2971	4.25863	3.22761	4.31028	2.21225	1.94577	1.51916
B1	ThiL	D	UniRef50_K1SZH1: Thiamine-monophosphate kinase (Fragment)	unclassified	0.63974	1.42902	0.946699	0.994919	4.24095	3.2971	4.25863	3.22761	4.31028	2.21225	1.94577	1.51916
B1	--	S	UniRef50_K1T011: Thiamine biosynthesis lipoprotein ApbE	unclassified	0	0	0	0	0.495541	0.888891	0	0	0	0	0	0
B1	--	D	UniRef50_K1T241: Thiamine-phosphate diphosphorylase (Fragment)	unclassified	0	0	0	0.205045	0	0	0	0	0	0	0	0
B1	--	D	UniRef50_K1T8D1: Dinucleotide-utilizing enzymes involved in molybdopterin and thiamine biosynthesis family 1 (Fragment)	unclassified	3.68825	3.13645	2.73937	0.613887	3.91988	3.19694	1.55002	2.11491	0.515408	0.785903	0.832667	0.484132
B1	--	D	UniRef50_K1TFN1: Protein containing Thiamine pyrophosphate enzyme (Fragment)	unclassified	0	0.654985	0	0	0	0	0	0	0	0.452322	0.582762	0.261473
B1	ThiE	S	UniRef50_K1TLB4: Thiamine-phosphate pyrophosphorylase	TOTAL	0	0	0	0	0.406141	0.643511	0	2.21269	0	0.306935	0	0
B1	ThiE	S	UniRef50_K1TLB4: Thiamine-phosphate pyrophosphorylase	unclassified	0	0	0	0	0.406141	0.643511	0	2.21269	0	0.306935	0	0
B1	ThiF	S	UniRef50_K1U029: HesA/MoeB/ThiF family protein (Fragment)	TOTAL	1.12859	1.33071	1.05043	0.488623	3.49357	2.48831	4.42594	4.80757	5.41038	2.71286	2.06996	2.17142
B1	ThiF	S	UniRef50_K1U029: HesA/MoeB/ThiF family protein (Fragment)	unclassified	1.12859	1.33071	1.05043	0.488623	3.49357	2.48831	4.42594	4.80757	5.41038	2.71286	2.06996	2.17142
B1	ThiH	S	UniRef50_K1UQX5: Thiazole biosynthesis protein ThiH (Fragment)	TOTAL	0	0.796103	0.639102	0.686982	3.33615	0.87647	0.735919	1.90901	1.39668	0.87016	0	0.22328
B1	ThiH	S	UniRef50_K1UQX5: Thiazole biosynthesis protein ThiH (Fragment)	unclassified	0	0.796103	0.639102	0.686982	3.33615	0.87647	0.735919	1.90901	1.39668	0.87016	0	0.22328
B1	ThiE	S	UniRef50_N2AG08: Thiamine-phosphate pyrophosphorylase	TOTAL	0	0	0	0	0	0	0	0	0	0.486286	0.909234	0
B1	ThiE	S	UniRef50_N2AG08: Thiamine-phosphate pyrophosphorylase	unclassified	0	0	0	0	0	0	0	0	0	0.486286	0.909234	0
B1	ThiE	S	UniRef50_Q8AA13: Thiamine-phosphate synthase	g__Bacteroides.s__Bacteroides_caecimuris	0.181409	0	0	0.0756343	0	0	0	0	0.40383	0.0290833	0	0.201746
B1	ThiE	S	UniRef50_Q8AA13: Thiamine-phosphate synthase	g__Bacteroides.s__Bacteroides_uniformis	1.36349	0	0.118497	0.543227	0	0	0	0	0.172644	0.328248	0	0.482999
B1	ThiE	S	UniRef50_Q8AA13: Thiamine-phosphate synthase	g__Prevotella.s__Prevotella_sp_MGM2	0.324058	0	0.206362	0.15204	0	0	0	0	0	0.194878	0	0.180245
B1	ThiE	S	UniRef50_Q8AA13: Thiamine-phosphate synthase	TOTAL	1.86896	0	0.32486	0.770902	0	0	0	0	0.93863	0.552209	0	1.09546
B1	ThiE	S	UniRef50_Q8AA13: Thiamine-phosphate synthase	unclassified	0	0	0	0	0	0	0	0	0.362156	0	0	0.230468
B1	ThiM	S	UniRef50_Q97EL4: Hydroxyethylthiazole kinase	g__Acutalibacter.s__Acutalibacter_muris	0.454462	0.0666384	0.152286	2.39337	0	0	0	0	0.266247	0.161068	0	0.133012
B1	ThiM	S	UniRef50_Q97EL4: Hydroxyethylthiazole kinase	g__Clostridium.s__Clostridium_sp_ASF356	0.99561	1.36616	1.29926	0	0.212182	0.207763	0	0.300277	0	0.114132	0	0
B1	ThiM	S	UniRef50_Q97EL4: Hydroxyethylthiazole kinase	g__Clostridium.s__Clostridium_sp_ASF502	16.9823	2.24221	7.49192	2.51207	0	0	0	0.0756721	6.94629	2.48414	1.66754	4.86753
B1	ThiM	S	UniRef50_Q97EL4: Hydroxyethylthiazole kinase	g__Dorea.s__Dorea_sp_5_2	24.3725	174.807	34.8585	347.949	0.488884	0.209432	0	0.376575	0.878088	2.55313	0.292551	0.372433
B1	ThiM	S	UniRef50_Q97EL4: Hydroxyethylthiazole kinase	g__Lachnospiraceae_unclassified.s__Lachnospiraceae_bacterium_3_2	0	0	0.0913713	0	0	0	0	0	0.585672	0.184078	0.468082	0.186216
B1	ThiM	S	UniRef50_Q97EL4: Hydroxyethylthiazole kinase	g__Lachnospiraceae_unclassified.s__Lachnospiraceae_bacterium_M18_1	27.3849	25.9804	0.974587	2.5723	0	0.0465405	0	0	0.477988	0.966408	0.175531	0.585216
B1	ThiM	S	UniRef50_Q97EL4: Hydroxyethylthiazole kinase	g__Oscillibacter.s__Oscillibacter_sp_1_3	0	2.55444	0	0	0	0.302482	0	0	1.81044	1.95519	0.585103	0
B1	ThiM	S	UniRef50_Q97EL4: Hydroxyethylthiazole kinase	TOTAL	73.7624	208.695	47.1567	360.746	0.701067	0.766218	0	0.752524	10.9647	9.14192	3.18881	6.79486
B1	ThiM	S	UniRef50_Q97EL4: Hydroxyethylthiazole kinase	unclassified	3.57264	1.6782	2.2888	5.3197	0	0	0	0	0	0.723773	0	0.65045
B1	--	D	UniRef50_R5ACM8: Pyruvate flavodoxin/ferredoxin oxidoreductase thiamine diP-binding domain protein	unclassified	0	0.242605	0.739104	0.508131	2.29714	2.75238	1.70906	2.06538	3.5527	1.64723	1.47221	1.93668
B1	ThiE	S	UniRef50_R5AKY7: Thiamine monophosphate synthase/TENI	g__Muribaculaceae_unclassified.s__Muribaculaceae_bacterium_DSM_103720	0.0352441	0.0327277	0	0.132248	0.224832	0.239865	0.186696	0.50172	0	0	0	0
B1	ThiE	S	UniRef50_R5AKY7: Thiamine monophosphate synthase/TENI	g__Muribaculum.s__Muribaculum_intestinale	0.975821	0.999149	2.44047	1.13636	1.1176	0.229153	1.02498	0.319362	0	0	0	0
B1	ThiE	S	UniRef50_R5AKY7: Thiamine monophosphate synthase/TENI	TOTAL	1.01106	1.03188	2.44047	1.26861	1.34243	0.469018	1.21168	0.821082	0	0	0	0
B1	ThiS	S	UniRef50_R5ANU3: Thiamine biosynthesis protein ThiS	g__Muribaculaceae_unclassified.s__Muribaculaceae_bacterium_DSM_103720	0	0	0	0.354761	0	1.10367	0	0	0	0	0	0
B1	ThiS	S	UniRef50_R5ANU3: Thiamine biosynthesis protein ThiS	TOTAL	0	0	0	0.354761	0	1.10367	0	0	0	0	0	0
B1	ThiF	S	UniRef50_R5AZQ0: ThiF family protein	TOTAL	0	0	0	0	0	0.343383	0	0	0	0	0	0
B1	ThiF	S	UniRef50_R5AZQ0: ThiF family protein	unclassified	0	0	0	0	0	0.343383	0	0	0	0	0	0
B1	ThiE	S	UniRef50_R5KUB7: Thiamine-phosphate pyrophosphorylase-like protein	TOTAL	1.95989	0.522613	0	0	12.0489	4.24213	6.90316	6.8974	0.31445	0	0	0
B1	ThiE	S	UniRef50_R5KUB7: Thiamine-phosphate pyrophosphorylase-like protein	unclassified	1.95989	0.522613	0	0	12.0489	4.24213	6.90316	6.8974	0.31445	0	0	0
B1	ApbE	S	UniRef50_R5KV70: Thiamine biosynthesis lipoprotein ApbE	g__Bacteroides.s__Bacteroides_uniformis	0	0	0	0.474521	0	0	0	0	0	0	0	0
B1	ApbE	S	UniRef50_R5KV70: Thiamine biosynthesis lipoprotein ApbE	unclassified	0	0	0	0	0.804617	0.238305	0	0.830521	0	0	0	0
B1	ThiH	S	UniRef50_R5PFD2: Tyrosine lyase ThiH	TOTAL	2.03355	3.207	5.52946	2.82897	0	0.608005	0.619077	0.703846	1.9968	3.33432	3.7034	1.98273
B1	ThiH	S	UniRef50_R5PFD2: Tyrosine lyase ThiH	unclassified	2.03355	3.207	5.52946	2.82897	0	0.608005	0.619077	0.703846	1.9968	3.33432	3.7034	1.98273
B1	ThiE	S	UniRef50_R5SDQ8: Thiamine-phosphate synthase	g__Dorea.s__Dorea_sp_5_2	0	0.558983	0	0	0	0	0	0	0.599418	0	0	0.528447
B1	ThiE	S	UniRef50_R5SDQ8: Thiamine-phosphate synthase	TOTAL	2.86032	3.13648	4.1475	0.921198	0	0.220516	0	0	0.599418	0.32692	0.346608	1.1902
B1	ThiE	S	UniRef50_R5SDQ8: Thiamine-phosphate synthase	unclassified	2.86032	2.5775	4.1475	0.921198	0	0.220516	0	0	0	0.32692	0.346608	0.661749
B1	ThiN	D	UniRef50_R6E4T5: Thiamine pyrophosphokinase	g__Oscillibacter.s__Oscillibacter_sp_1_3	0	0.362688	0	0	0	0	0	0	0.543274	0	0	0
B1	ThiN	D	UniRef50_R6E4T5: Thiamine pyrophosphokinase	TOTAL	0	0.362688	0	0	0	0	0	0	0.543274	0	0	0
B1	ThiN	D	UniRef50_R6EXH4: Thiamine pyrophosphokinase	TOTAL	0	0.927475	0	0.567979	0	0	0	0	0	0	0	0
B1	ThiN	D	UniRef50_R6EXH4: Thiamine pyrophosphokinase	unclassified	0	0.927475	0	0.567979	0	0	0	0	0	0	0	0
B1	--	S	UniRef50_R6IXH5: Biotin and thiamin synthesis associated	unclassified	0	0.360508	0	0	0	0	0	0	0	0	0	0
B1	--	D	UniRef50_R6QLD3: Thiamine pyrophosphate TPP-binding domain-containing protein	unclassified	0.455607	0.695821	0.451199	0.848512	0.342732	0.679669	0.442476	0.592594	2.21399	2.25686	3.2815	1.38504
B1	--	D	UniRef50_R6STX3: Transketolase thiamine diphosphate binding domain protein	unclassified	3.59854	2.14232	0.789521	2.03055	2.07642	1.86506	3.49364	0.312304	0.865508	1.65765	0.670258	0
B1	ThiF	S	UniRef50_R6VHB5: ThiF family protein	TOTAL	0	0	0	0.465228	0.610924	0	0	1.78675	0.5618	0	0	0
B1	ThiF	S	UniRef50_R6VHB5: ThiF family protein	unclassified	0	0	0	0.465228	0.610924	0	0	1.78675	0.5618	0	0	0
B1	ThiD	S	UniRef50_R6VHN1: Phosphomethylpyrimidine kinase	g__Lachnospiraceae_unclassified.s__Lachnospiraceae_bacterium_A2	0	0	0	0.64887	0	0	0	0	0.658622	0.66543	0	0
B1	ThiD	S	UniRef50_R6VHN1: Phosphomethylpyrimidine kinase	TOTAL	0	0	0	0.64887	0	0	0	0	0.658622	0.66543	0	0
B1	--	S	UniRef50_R6VIB0: Membrane-associated lipoprotein involved in thiamine biosynthesis	unclassified	0.327534	0.405172	0.208305	0.408634	5.25841	2.51929	3.60948	4.65816	2.30547	1.83492	1.59986	1.09091
B1	--	D	UniRef50_R6VVF7: Pyruvate flavodoxin/ferredoxin oxidoreductase thiamine diP-binding domain protein	unclassified	0	0	0	0	0.677664	1.21366	0.632411	1.90098	1.96943	1.5601	0	0.713593
B1	ThiF	S	UniRef50_R6WX39: ThiF family protein	g__Muribaculaceae_unclassified.s__Muribaculaceae_bacterium_DSM_103720	0	0	0	0	0.390167	0.495238	0	1.44941	0	0	0	0
B1	ThiF	S	UniRef50_R6WX39: ThiF family protein	TOTAL	0	0	0	0	0.390167	0.495238	0	1.44941	0	0	0	0
B1	--	D	UniRef50_R6YUW2: Thiamine pyrophosphate-requiring enzymes [acetolactate synthase pyruvate dehydrogenase (Cytochrome) glyoxylate carboligase phosphonopyruvate decarboxylase]	unclassified	1.69583	0.970263	1.08006	0.64405	0.83303	0.349363	0	0	0	0.156818	0.83229	0.326366
B1	ThiF	S	UniRef50_R6ZDG0: ThiF family protein	g__Clostridium.s__Clostridium_sp_ASF502	0.299173	0.0252556	1.07314	0	0	0	0	0	1.96772	0.60125	0.898042	1.57277
B1	ThiF	S	UniRef50_R6ZDG0: ThiF family protein	g__Lachnospiraceae_unclassified.s__Lachnospiraceae_bacterium_M18_1	0.716009	0.409822	0.0702206	0	0	0	0	0	0.399	0.795711	0.337247	0.214666
B1	ThiF	S	UniRef50_R6ZDG0: ThiF family protein	TOTAL	3.4586	3.98805	2.81391	2.51985	1.2672	1.1776	0	0	4.22914	3.10443	3.11664	3.90095
B1	ThiF	S	UniRef50_R6ZDG0: ThiF family protein	unclassified	2.44342	3.55297	1.67054	2.51985	1.2672	1.1776	0	0	1.86242	1.70747	1.88135	2.11351
B1	ThiF	S	UniRef50_R7BRD4: Thiamine biosynthesis protein ThiF	TOTAL	0	0.150411	0.632826	0	0	0	0	0	0	0	0	0
B1	ThiF	S	UniRef50_R7BRD4: Thiamine biosynthesis protein ThiF	unclassified	0	0.150411	0.632826	0	0	0	0	0	0	0	0	0
B1	ThiN	D	UniRef50_R7CB29: Thiamine diphosphokinase	TOTAL	0	0	0	0	0	0.425403	0	0	0	0	0	0
B1	ThiN	D	UniRef50_R7CB29: Thiamine diphosphokinase	unclassified	0	0	0	0	0	0.425403	0	0	0	0	0	0
B1	--	S	UniRef50_R7H4D0: Dinucleotide-utilizing enzymes involved in molybdopterin and thiamine biosynthesis family 1	unclassified	0	1.32921	0.628889	0.549732	4.71632	0	0	0	2.26747	3.28179	2.33627	2.57288
B1	ThiG	S	UniRef50_R7JBN6: Thiazole synthase	TOTAL	0	0	0	0	1.72083	0	0	1.62059	0.840856	0	0	0
B1	ThiG	S	UniRef50_R7JBN6: Thiazole synthase	unclassified	0	0	0	0	1.72083	0	0	1.62059	0.840856	0	0	0
B1	ThiL	D	UniRef50_R7JLF5: Thiamine-monophosphate kinase	TOTAL	0	0	0	0	0	0.440316	0	0	0	0	0	0
B1	ThiL	D	UniRef50_R7JLF5: Thiamine-monophosphate kinase	unclassified	0	0	0	0	0	0.440316	0	0	0	0	0	0
B1	ThiE	S	UniRef50_R7MKM9: Thiamine-phosphate synthase	TOTAL	0.25869	0	0	0	0	0	0	0	0	0	0	0
B1	ThiE	S	UniRef50_R7MKM9: Thiamine-phosphate synthase	unclassified	0.25869	0	0	0	0	0	0	0	0	0	0	0
B1	ThiM	S	UniRef50_R9KMW9: Hydroxyethylthiazole kinase	g__Lachnospiraceae_unclassified.s__Lachnospiraceae_bacterium_A2	0	0	5.60595	10.6025	0	0	0	0	3.31412	1.92903	0	0
B1	ThiM	S	UniRef50_R9KMW9: Hydroxyethylthiazole kinase	TOTAL	2.15398	0.345428	5.60595	10.6025	0	0	0	0	3.31412	4.58483	1.38876	0
B1	ThiM	S	UniRef50_R9KMW9: Hydroxyethylthiazole kinase	unclassified	2.15398	0.345428	0	0	0	0	0	0	0	2.6558	1.38876	0
B1	ThiN	D	UniRef50_R9L202: Thiamine pyrophosphokinase	g__Lachnospiraceae_unclassified.s__Lachnospiraceae_bacterium_A2	0	0.450196	0	0.433138	0	0	0	0	0	0	0	0
B1	ThiN	D	UniRef50_R9L202: Thiamine pyrophosphokinase	TOTAL	0	0.450196	0	0.433138	0	0	0	0	0.324351	0	0	0
B1	ThiN	D	UniRef50_R9L202: Thiamine pyrophosphokinase	unclassified	0	0	0	0	0	0	0	0	0.324351	0	0	0
B1	ThiN	D	UniRef50_R9LVB4: Thiamine pyrophosphokinase	g__Anaerotruncus.s__Anaerotruncus_sp_G3_2012	0	0	0	0	0	0.467281	0	0	0	0	0	0
B1	ThiN	D	UniRef50_R9LVB4: Thiamine pyrophosphokinase	TOTAL	0	0	0	0	0	0.467281	0	0	0	0	0	0
B1	ThiN	D	UniRef50_S0J6Q1: Thiamine pyrophosphokinase	g__Lachnospiraceae_unclassified.s__Lachnospiraceae_bacterium_A2	0	0	0.889807	0	0	0	0	0.575303	1.08209	0.321549	0	0
B1	ThiN	D	UniRef50_S0J6Q1: Thiamine pyrophosphokinase	TOTAL	4.65702	0.893706	0.889807	1.04491	0.646686	1.00977	0	1.13605	3.42131	3.80323	2.46113	2.05579
B1	ThiN	D	UniRef50_S0J6Q1: Thiamine pyrophosphokinase	unclassified	4.65702	0.893706	0	1.04491	0.646686	1.00977	0	0.560751	2.33922	3.48168	2.46113	2.05579
B1	--	D	UniRef50_T0CUG1: Pyruvate flavodoxin/ferredoxin oxidoreductase, thiamine diP-bdg family protein	unclassified	3.86416	16.3764	0	14.9158	8.68117	5.40954	5.6046	7.52132	2.51807	0	0	1.48696
B1	--	D	UniRef50_T0DS26: Pyruvate flavodoxin/ferredoxin oxidoreductase, thiamine diP-bdg family protein	unclassified	38.6932	32.6831	32.9716	29.786	28.7887	28.4457	26.5417	28.5639	53.7467	51.754	48.1998	39.0797
B1	--	D	UniRef50_T0DXC4: Pyruvate flavodoxin/ferredoxin oxidoreductase, thiamine diP-bdg family protein	unclassified	0	2.39672	0	0	4.05209	3.03943	1.60872	3.58411	5.26814	4.24715	4.70006	4.98815
B1	ThiH	S	UniRef50_T0SWY1: Thiazole biosynthesis protein ThiH	TOTAL	0	0.617491	0	0.757097	0	0	0.327863	0	0	0	0	0.573697
B1	ThiH	S	UniRef50_T0SWY1: Thiazole biosynthesis protein ThiH	unclassified	0	0.617491	0	0.757097	0	0	0.327863	0	0	0	0	0.573697
B1	ThiC	S	UniRef50_U6EU11: Thiamine biosynthesis protein ThiC	TOTAL	0.146166	0	0	0	0	0.285261	0	0	0	0	0	0
B1	ThiC	S	UniRef50_U6EU11: Thiamine biosynthesis protein ThiC	unclassified	0.146166	0	0	0	0	0.285261	0	0	0	0	0	0
B1	--	D	UniRef50_V1CLT8: Pyruvate flavodoxin/ferredoxin oxidoreductase, thiamine diP-binding domain protein	unclassified	0	0	2.23163	1.68714	2.81612	0	0	2.73971	0	0	0	0.957231
B1	ThiS	S	UniRef50_V2QAZ5: Thiamine biosynthesis protein ThiS	g__Mucispirillum.s__Mucispirillum_schaedleri	0.425447	0	0	0	0.543447	1.10367	0.375614	0	1.05857	3.00112	1.91063	3.62618
B1	ThiS	S	UniRef50_V2QAZ5: Thiamine biosynthesis protein ThiS	TOTAL	0.425447	0	0	0	0.543447	1.10367	0.375614	0	1.05857	3.00112	1.91063	3.62618
B1	ThiL	D	UniRef50_V2QBZ9: Thiamine-monophosphate kinase	g__Mucispirillum.s__Mucispirillum_schaedleri	0	0	0	0	0.987645	0.467609	0.663705	0	0.883912	1.28575	1.09907	0.696886
B1	ThiL	D	UniRef50_V2QBZ9: Thiamine-monophosphate kinase	TOTAL	0	0	0	0	0.987645	0.467609	0.663705	0	0.883912	1.28575	1.09907	0.696886
B1	ThiF	S	UniRef50_V2QC77: Thiamine biosynthesis protein ThiF	g__Mucispirillum.s__Mucispirillum_schaedleri	0	0	0	0	0.534421	0.35915	0.45458	0	0.683501	1.7283	1.23399	1.3413
B1	ThiF	S	UniRef50_V2QC77: Thiamine biosynthesis protein ThiF	TOTAL	0	0	0	0	0.534421	0.35915	0.45458	0	0.683501	1.7283	1.23399	1.3413
B1	ThiE	S	UniRef50_V2QFM4: Thiamine-phosphate synthase	g__Mucispirillum.s__Mucispirillum_schaedleri	0	0	0	0	0.744211	0.503851	0.385821	0.358415	0.756568	1.77465	1.38564	1.61993
B1	ThiE	S	UniRef50_V2QFM4: Thiamine-phosphate synthase	TOTAL	0.238052	0	0	0	0.744211	0.503851	0.385821	0.358415	0.756568	1.77465	1.38564	1.61993
B1	ThiE	S	UniRef50_V2QFM4: Thiamine-phosphate synthase	unclassified	0.238052	0	0	0	0	0	0	0	0	0	0	0
B1	ThiH	S	UniRef50_W4PDD3: Thiazole biosynthesis protein ThiH	TOTAL	0.961924	0.90022	0.677085	0.444925	2.14649	1.277	0.997668	1.71894	0.839527	0	0.458482	1.03061
B1	ThiH	S	UniRef50_W4PDD3: Thiazole biosynthesis protein ThiH	unclassified	0.961924	0.90022	0.677085	0.444925	2.14649	1.277	0.997668	1.71894	0.839527	0	0.458482	1.03061
B1	ThiC	S	UniRef50_W4PLE3: Hydroxymethylpyrimidine phosphate synthase ThiC	TOTAL	4.57236	0.963034	0.263787	0.907346	1.0602	1.04355	1.37502	2.10106	0.288074	0.899385	0.637516	1.27629
B1	ThiC	S	UniRef50_W4PLE3: Hydroxymethylpyrimidine phosphate synthase ThiC	unclassified	4.57236	0.963034	0.263787	0.907346	1.0602	1.04355	1.37502	2.10106	0.288074	0.899385	0.637516	1.27629
B1	dsx	S	UniRef50_W4PT02: 1-deoxy-D-xylulose 5-phosphate synthase	TOTAL	0	1.00066	0	1.56634	0	1.40388	1.28178	2.42846	0.680789	0	0.355604	0.581148
B1	dsx	S	UniRef50_W4PT02: 1-deoxy-D-xylulose 5-phosphate synthase	unclassified	0	1.00066	0	1.56634	0	1.40388	1.28178	2.42846	0.680789	0	0.355604	0.581148
B1	ThiH	S	UniRef50_W4PVY4: Thiazole biosynthesis protein ThiH	TOTAL	4.40231	2.59157	2.38946	2.78306	5.55557	3.71843	2.10374	8.64264	1.3401	1.08715	0.744464	1.11288
B1	ThiH	S	UniRef50_W4PVY4: Thiazole biosynthesis protein ThiH	unclassified	4.40231	2.59157	2.38946	2.78306	5.55557	3.71843	2.10374	8.64264	1.3401	1.08715	0.744464	1.11288
B1	ThiE	S	UniRef50_W4TYW3: Thiamine pyrophosphate enzyme	TOTAL	0	0	0	0	0	0	0	0	0	0.290102	0	0
B1	--	D	UniRef50_W4TYW3: Thiamine pyrophosphate enzyme	unclassified	0	0	0	0	0	0	0	0	0	0.290102	0	0
B2	RibL	D	2.7.1.26: Riboflavin kinase	TOTAL	30.4991	24.1645	19.4049	23.0483	13.036	15.7594	12.1973	16.7569	42.2216	35.7263	47.0796	41.8406
B2	RibB	S	UniRef50_A2SQG6: 3,4-dihydroxy-2-butanone 4-phosphate synthase	TOTAL	1.18407	0	0	2.39799	0	1.52243	0.924743	0	1.87626	1.89781	0	0
B2	RibB	S	UniRef50_A2SQG6: 3,4-dihydroxy-2-butanone 4-phosphate synthase	unclassified	1.18407	0	0	2.39799	0	1.52243	0.924743	0	1.87626	1.89781	0	0
B2	RibBA	S	UniRef50_A4QEG9: Riboflavin biosynthesis protein RibBA	g__Bacteroides.s__Bacteroides_caecimuris	0.48463	0.493579	0.955425	0	0.718873	0.866969	1.22147	0.568733	0.539366	0.556387	0.420629	0.382487
B2	RibBA	S	UniRef50_A4QEG9: Riboflavin biosynthesis protein RibBA	g__Bacteroides.s__Bacteroides_uniformis	1.70813	0.713193	0.259429	0.979938	0.360269	0.137233	0.269544	0.322282	0.348923	0.331703	0.364227	0.522931
B2	RibBA	S	UniRef50_A4QEG9: Riboflavin biosynthesis protein RibBA	g__Muribaculaceae_unclassified.s__Muribaculaceae_bacterium_DSM_103720	0.138518	0.0571678	0.0783857	0.32726	0.923983	0.987907	0.509554	1.85011	0.342583	0.0296094	0.0188231	0
B2	RibBA	S	UniRef50_A4QEG9: Riboflavin biosynthesis protein RibBA	TOTAL	2.33128	1.26394	1.29324	1.3072	2.00313	1.99211	2.00057	2.74113	1.23087	0.917699	0.803679	0.905418
B2	RibE	S	UniRef50_A5FNH3: 6,7-dimethyl-8-ribityllumazine synthase	g__Prevotella.s__Prevotella_sp_MGM2	0	0.397913	1.57742	1.44673	0	0	0	0	0	0	0	0.381237
B2	RibE	S	UniRef50_A5FNH3: 6,7-dimethyl-8-ribityllumazine synthase	TOTAL	0	0.397913	1.57742	1.44673	0	0	0	0	0	0	0	0.381237
B2	RibE	S	UniRef50_A6L8H3: 6,7-dimethyl-8-ribityllumazine synthase	g__Bacteroides.s__Bacteroides_caecimuris	0.978427	0.434577	1.30008	0	0.652136	0.82756	0.901475	0.605647	1.04179	0.65479	0.832518	0.757027
B2	RibE	S	UniRef50_A6L8H3: 6,7-dimethyl-8-ribityllumazine synthase	TOTAL	0.978427	1.19761	1.30008	0	2.84906	2.63305	0.901475	2.39932	1.82562	0.65479	0.832518	0.757027
B2	RibE	S	UniRef50_A6L8H3: 6,7-dimethyl-8-ribityllumazine synthase	unclassified	0	0.763036	0	0	2.19692	1.80549	0	1.79367	0.783838	0	0	0
B2	RibD	S	UniRef50_C4ZB24: Adenosine deaminase	TOTAL	0	0	0	0	0	0	0	0	0.432517	0	0	0
B2	RibD	S	UniRef50_C4ZB24: Adenosine deaminase	unclassified	0	0	0	0	0	0	0	0	0.432517	0	0	0
B2	RibF1	D	UniRef50_D4IQ53: FAD synthase	TOTAL	0	0	0	0	1.40204	1.08983	0.703247	1.31559	1.39328	0.866593	1.15316	1.00814
B2	RibF1	D	UniRef50_D4IQ53: FAD synthase	unclassified	0	0	0	0	1.40204	1.08983	0.703247	1.31559	1.39328	0.866593	1.15316	1.00814
B2	RibC	S	UniRef50_F3PPK6: Riboflavin synthase, alpha subunit	TOTAL	2.12955	1.52525	2.11292	1.72442	5.97291	4.19821	5.77259	4.97744	4.42781	2.20437	1.78589	2.05405
B2	RibC	S	UniRef50_F3PPK6: Riboflavin synthase, alpha subunit	unclassified	2.12955	1.52525	2.11292	1.72442	5.97291	4.19821	5.77259	4.97744	4.42781	2.20437	1.78589	2.05405
B2	RibD	S	UniRef50_F9ZB86: Riboflavin biosynthesis protein RibD	TOTAL	0	0	0	0	0	0	0	0	0.527669	0	0	0
B2	RibD	S	UniRef50_F9ZB86: Riboflavin biosynthesis protein RibD	unclassified	0	0	0	0	0	0	0	0	0.527669	0	0	0
B2	ribL	D	UniRef50_G7G4R3: Glycerol-3-phosphate cytidylyltransferase	TOTAL	0	0	0	0	0	0	0	0	0	0	0.459473	0
B2	ribL	D	UniRef50_G7G4R3: Glycerol-3-phosphate cytidylyltransferase	unclassified	0	0	0	0	0	0	0	0	0	0	0.459473	0
B2	RibB	S	UniRef50_I6GPN0: 3,4-dihydroxy-2-butanone 4-phosphate synthase domain protein	TOTAL	0	0	0	0	0	0	0	0	0	0	0	0.385863
B2	RibB	S	UniRef50_I6GPN0: 3,4-dihydroxy-2-butanone 4-phosphate synthase domain protein	unclassified	0	0	0	0	0	0	0	0	0	0	0	0.385863
B2	RibD	S	UniRef50_K1RDZ9: Riboflavin biosynthesis protein RibD	TOTAL	0	0	0	0.216252	0	0	0	0.660413	0.435052	0.601485	0.730504	0.463657
B2	RibD	S	UniRef50_K1RDZ9: Riboflavin biosynthesis protein RibD	unclassified	0	0	0	0.216252	0	0	0	0.660413	0.435052	0.601485	0.730504	0.463657
B2	RibD	D	UniRef50_K1RF53: Riboflavin biosynthesis protein RibF	TOTAL	0.918359	0	0	0	0	0	0	0	0	0	1.54364	0.914025
B2	RibD	D	UniRef50_K1RF53: Riboflavin biosynthesis protein RibF	unclassified	0.918359	0	0	0	0	0	0	0	0	0	1.54364	0.914025
B2	Rib	S	UniRef50_K1SKD1: Riboflavin biosynthesis protein (Fragment)	TOTAL	0.912259	0.753323	0	1.36541	0	0.275768	0	0.44906	0.99179	0.629513	3.22789	1.7069
B2	Rib	S	UniRef50_K1SKD1: Riboflavin biosynthesis protein (Fragment)	unclassified	0.912259	0.753323	0	1.36541	0	0.275768	0	0.44906	0.99179	0.629513	3.22789	1.7069
B2	Rib	D	UniRef50_K1SZY0: Riboflavin biosynthesis protein RibF (Fragment)	TOTAL	0	0	0	0	0	0	0	0.147206	0	0	0.341462	0
B2	Rib	D	UniRef50_K1SZY0: Riboflavin biosynthesis protein RibF (Fragment)	unclassified	0	0	0	0	0	0	0	0.147206	0	0	0.341462	0
B2	ribL	D	UniRef50_K1T5P3: Glycerol-3-phosphate cytidylyltransferase (Fragment)	TOTAL	0	0	0	0	0	0	0	0	0	0	0	0.364353
B2	ribL	D	UniRef50_K1T5P3: Glycerol-3-phosphate cytidylyltransferase (Fragment)	unclassified	0	0	0	0	0	0	0	0	0	0	0	0.364353
B2	Rib	S	UniRef50_K1TIW6: Riboflavin biosynthesis protein ribBA (Fragment)	TOTAL	2.7602	1.50773	1.23142	2.4896	6.409	5.24507	3.00942	5.31015	4.34637	3.09158	3.89776	2.50343
B2	Rib	S	UniRef50_K1TIW6: Riboflavin biosynthesis protein ribBA (Fragment)	unclassified	2.7602	1.50773	1.23142	2.4896	6.409	5.24507	3.00942	5.31015	4.34637	3.09158	3.89776	2.50343
B2	RibH	S	UniRef50_K1UAP4: 6,7-dimethyl-8-ribityllumazine synthase (Fragment)	TOTAL	0.753477	0.611781	1.14011	1.00256	0.240261	0.915614	0	0	0.89197	0.997662	1.43956	1.20665
B2	RibH	S	UniRef50_K1UAP4: 6,7-dimethyl-8-ribityllumazine synthase (Fragment)	unclassified	0.753477	0.611781	1.14011	1.00256	0.240261	0.915614	0	0	0.89197	0.997662	1.43956	1.20665
B2	Rib	S	UniRef50_M6T510: Riboflavin biosynthesis protein ribBA domain protein	TOTAL	0	0	0	0	1.05958	0	1.45905	0.654764	0	0	0	0
B2	Rib	S	UniRef50_M6T510: Riboflavin biosynthesis protein ribBA domain protein	unclassified	0	0	0	0	1.05958	0	1.45905	0.654764	0	0	0	0
B2	ribL	D	UniRef50_P27623: Glycerol-3-phosphate cytidylyltransferase	TOTAL	0	0	0	0	0	0	0	0	0	0	0	0.245821
B2	ribL	D	UniRef50_P27623: Glycerol-3-phosphate cytidylyltransferase	unclassified	0	0	0	0	0	0	0	0	0	0	0	0.245821
B2	Rib	S	UniRef50_P50853: Riboflavin biosynthesis protein RibD	g__Clostridium.s__Clostridium_sp_ASF356	0.954918	0.854517	0.641176	0	0.753832	0	0	0	0	0.0167038	0	0
B2	Rib	S	UniRef50_P50853: Riboflavin biosynthesis protein RibD	g__Clostridium.s__Clostridium_sp_ASF502	0.0667581	0.155744	0.170903	0	0	0	0	0	0.298796	0.161168	0.0820792	0.410501
B2	Rib	S	UniRef50_P50853: Riboflavin biosynthesis protein RibD	g__Eubacterium.s__Eubacterium_plexicaudatum	0	0	0	0	0.0439784	0	0	0	0	0	0	0
B2	Rib	S	UniRef50_P50853: Riboflavin biosynthesis protein RibD	g__Lachnospiraceae_unclassified.s__Lachnospiraceae_bacterium_A4	0	0.0643138	0	1.38522	0.176936	0	0	0	1.63782	5.87798	3.30351	0.770231
B2	Rib	S	UniRef50_P50853: Riboflavin biosynthesis protein RibD	TOTAL	1.02168	1.07458	0.812079	1.38522	0.974746	0	0	0	1.93662	6.05585	3.38559	1.18073
B2	RibH	S	UniRef50_Q3MCG0: 6,7-dimethyl-8-ribityllumazine synthase	g__Eubacterium.s__Eubacterium_plexicaudatum	0	0	0	0	0.34847	0	1.08368	0	0	0	0	0
B2	RibH	S	UniRef50_Q3MCG0: 6,7-dimethyl-8-ribityllumazine synthase	g__Lachnospiraceae_unclassified.s__Lachnospiraceae_bacterium_A4	0	0	0	1.15489	0	0	0.0611465	0	1.18201	7.19126	3.16228	1.07832
B2	RibH	S	UniRef50_Q3MCG0: 6,7-dimethyl-8-ribityllumazine synthase	g__Lachnospiraceae_unclassified.s__Lachnospiraceae_bacterium_M18_1	0.44092	1.11445	0	0	0	0	0	0	0	0	0	0.0494327
B2	RibH	S	UniRef50_Q3MCG0: 6,7-dimethyl-8-ribityllumazine synthase	TOTAL	0.44092	1.11445	0	1.15489	0.34847	0	1.14483	0	1.18201	7.19126	3.16228	1.12776
B2	RibH	S	UniRef50_Q6MCT6: 6,7-dimethyl-8-ribityllumazine synthase	g__Lactobacillus.s__Lactobacillus_reuteri	0	0	0	0.466233	0	0	0.492994	0.294412	0	0	0	0
B2	RibH	S	UniRef50_Q6MCT6: 6,7-dimethyl-8-ribityllumazine synthase	TOTAL	0	0	0	0.466233	0	0	0.492994	0.294412	0	0	0	0
B2	Rib	D	UniRef50_R5AJY5: Riboflavin biosynthesis protein RibF	g__Muribaculaceae_unclassified.s__Muribaculaceae_bacterium_DSM_103720	0	0	0	0	0.451842	0.911595	0.413701	2.50285	0.347703	0	0	0
B2	Rib	D	UniRef50_R5AJY5: Riboflavin biosynthesis protein RibF	TOTAL	0	0	0	0	0.451842	0.911595	0.413701	2.50285	0.347703	0	0	0
B2	RibA	S	UniRef50_R5ATK6: GTP cyclohydrolase II	TOTAL	2.69996	0.586211	0.538506	1.32486	2.63365	2.41976	1.8233	1.92781	1.17477	0.611452	0.518014	1.41173
B2	RibA	S	UniRef50_R5ATK6: GTP cyclohydrolase II	unclassified	2.69996	0.586211	0.538506	1.32486	2.63365	2.41976	1.8233	1.92781	1.17477	0.611452	0.518014	1.41173
B2	RibD	S	UniRef50_R5AU38: Riboflavin biosynthesis protein RibD	g__Muribaculaceae_unclassified.s__Muribaculaceae_bacterium_DSM_103720	0.0401095	0.0744914	0	0	0.460654	0.50629	0.212469	1.52258	0.379444	0.270074	0	0
B2	RibD	S	UniRef50_R5AU38: Riboflavin biosynthesis protein RibD	g__Muribaculum.s__Muribaculum_intestinale	0.707652	0.839688	1.07595	1.25327	0.954143	0.114738	0.442527	0.684046	0	0.0567269	0	0
B2	RibD	S	UniRef50_R5AU38: Riboflavin biosynthesis protein RibD	TOTAL	0.747762	0.914179	1.07595	1.25327	1.4148	0.621028	0.654996	2.20663	0.379444	0.3268	0	0
B2	RibC	S	UniRef50_R5CEQ6: Riboflavin synthase alpha subunit	TOTAL	1.59352	1.07181	1.58238	1.32622	9.00981	3.61473	8.81001	8.51911	1.20958	0.389778	0	0
B2	RibC	S	UniRef50_R5CEQ6: Riboflavin synthase alpha subunit	unclassified	1.59352	1.07181	1.58238	1.32622	9.00981	3.61473	8.81001	8.51911	1.20958	0.389778	0	0
B2	RibD	S	UniRef50_R5GEE4: Riboflavin biosynthesis protein RibA	TOTAL	0	3.66979	0	6.10678	11.0538	7.77694	6.69466	13.7986	0	1.9518	0	0
B2	RibD	S	UniRef50_R5GEE4: Riboflavin biosynthesis protein RibA	unclassified	0	3.66979	0	6.10678	11.0538	7.77694	6.69466	13.7986	0	1.9518	0	0
B2	RibC	S	UniRef50_R5RP70: Riboflavin synthase alpha subunit	TOTAL	0.940465	0	0.88373	0.619456	0.569741	0.481788	0.294111	0	1.59816	1.02199	1.84739	1.62246
B2	RibC	S	UniRef50_R5RP70: Riboflavin synthase alpha subunit	unclassified	0.940465	0	0.88373	0.619456	0.569741	0.481788	0.294111	0	1.59816	1.02199	1.84739	1.62246
B2	RibD	S	UniRef50_R5UC46: Riboflavin biosynthesis protein RibD C-terminal domain protein	TOTAL	0	0	0	0	0	0	0	0.593175	0	0	0	0
B2	RibD	S	UniRef50_R5UC46: Riboflavin biosynthesis protein RibD C-terminal domain protein	unclassified	0	0	0	0	0	0	0	0.593175	0	0	0	0
B2	ribL	D	UniRef50_R6FHL7: Glycerol-3-phosphate cytidylyltransferase	TOTAL	0.995306	0.993521	0	4.00963	1.10398	2.48272	3.1329	1.33536	1.95862	0.92891	1.62034	1.36568
B2	ribL	D	UniRef50_R6FHL7: Glycerol-3-phosphate cytidylyltransferase	unclassified	0.995306	0.993521	0	4.00963	1.10398	2.48272	3.1329	1.33536	1.95862	0.92891	1.62034	1.36568
B2	RibD	D	UniRef50_R6G728: Riboflavin biosynthesis protein RibF	g__Clostridium.s__Clostridium_sp_ASF502	2.70407	0	1.55562	0.436629	0	0	0	0.345098	13.2817	2.97886	8.88356	11.6695
B2	RibD	D	UniRef50_R6G728: Riboflavin biosynthesis protein RibF	TOTAL	2.70407	0	1.55562	0.436629	0	0	0	0.345098	13.2817	2.97886	8.88356	11.6695
B2	RibD	S	UniRef50_R6PW25: Riboflavin biosynthesis protein ribBA	TOTAL	1.97799	1.02049	0	0.275079	1.9596	1.17637	0	1.56059	0.731371	0.5292	1.87951	1.83549
B2	RibD	S	UniRef50_R6PW25: Riboflavin biosynthesis protein ribBA	unclassified	1.97799	1.02049	0	0.275079	1.9596	1.17637	0	1.56059	0.731371	0.5292	1.87951	1.83549
B2	RibD	S	UniRef50_R6VQE5: Pyrimidine reductase riboflavin biosynthesis	TOTAL	0	0	0	0	0.565548	0.494529	0	0	0	0	0	0
B2	RibD	S	UniRef50_R6VQE5: Pyrimidine reductase riboflavin biosynthesis	unclassified	0	0	0	0	0.565548	0.494529	0	0	0	0	0	0
B2	RibF1	D	UniRef50_R6W1M6: FAD synthase	TOTAL	0	0	0	0	0	0.584558	0	0.250121	0.774675	0.486478	0.425264	0
B2	RibF1	D	UniRef50_R6W1M6: FAD synthase	unclassified	0	0	0	0	0	0.584558	0	0.250121	0.774675	0.486478	0.425264	0
B2	RibF1	D	UniRef50_R6WP28: FAD synthase	TOTAL	0	0.132391	0	0	0	0.579385	0	0	0.820745	0.780663	0.852651	0.502649
B2	RibF1	D	UniRef50_R6WP28: FAD synthase	unclassified	0	0.132391	0	0	0	0.579385	0	0	0.820745	0.780663	0.852651	0.502649
B2	RibL	D	UniRef50_R6ZJK5: Riboflavin kinase/FMN adenylyltransferase	TOTAL	0	0	0	0	0	0	0	0	0.753822	0.339988	0	0.589662
B2	RibL	D	UniRef50_R6ZJK5: Riboflavin kinase/FMN adenylyltransferase	unclassified	0	0	0	0	0	0	0	0	0.753822	0.339988	0	0.589662
B2	RibD	D	UniRef50_R7B3B8: Riboflavin biosynthesis protein RibF	TOTAL	0.191006	0.65873	0	0.273081	0.383637	0.23897	0	0.94964	0.516472	0.787609	1.23453	0.684211
B2	RibD	D	UniRef50_R7B3B8: Riboflavin biosynthesis protein RibF	unclassified	0.191006	0.65873	0	0.273081	0.383637	0.23897	0	0.94964	0.516472	0.787609	1.23453	0.684211
B2	RibE	S	UniRef50_R7J021: 6,7-dimethyl-8-ribityllumazine synthase	TOTAL	3.51968	2.05832	5.03303	3.71303	7.73009	4.0913	4.59675	11.369	2.04978	0.869032	0	0
B2	RibE	S	UniRef50_R7J021: 6,7-dimethyl-8-ribityllumazine synthase	unclassified	3.51968	2.05832	5.03303	3.71303	7.73009	4.0913	4.59675	11.369	2.04978	0.869032	0	0
B2	RibD	D	UniRef50_R8VTT9: Riboflavin biosynthesis protein RibF	TOTAL	0.264827	0.189223	0	0.586174	0.52049	1.0308	0	0.644441	0	0	0	0
B2	RibD	D	UniRef50_R8VTT9: Riboflavin biosynthesis protein RibF	unclassified	0.264827	0.189223	0	0.586174	0.52049	1.0308	0	0.644441	0	0	0	0
B2	RibD	S	UniRef50_R9JTL2: Riboflavin biosynthesis protein RibD	TOTAL	0.566139	2.71454	0	0	0	0.33106	0	0	0	0	0	0
B2	RibD	S	UniRef50_R9JTL2: Riboflavin biosynthesis protein RibD	unclassified	0.566139	2.71454	0	0	0	0.33106	0	0	0	0	0	0
B2	RibD	S	UniRef50_R9KB23: Riboflavin biosynthesis protein RibD	g__Lachnospiraceae_unclassified.s__Lachnospiraceae_bacterium_A2	0.262322	0.659121	4.67489	2.91406	0	0	0.469969	0.951881	0.806791	0.608578	0	0
B2	RibD	S	UniRef50_R9KB23: Riboflavin biosynthesis protein RibD	TOTAL	2.26922	0.968849	4.67489	3.78458	0.821676	0.690827	1.13668	0.951881	2.24086	2.43916	2.12476	0
B2	RibD	S	UniRef50_R9KB23: Riboflavin biosynthesis protein RibD	unclassified	2.0069	0.309729	0	0.870526	0.821676	0.690827	0.666714	0	1.43407	1.83058	2.12476	0
B2	RibE	S	UniRef50_S7V6X3: Riboflavin synthase eubacterial/eukaryotic	TOTAL	0.417526	0	0	0.098026	0	0	0	0	0	0	0	0
B2	RibE	S	UniRef50_S7V6X3: Riboflavin synthase eubacterial/eukaryotic	unclassified	0.417526	0	0	0.098026	0	0	0	0	0	0	0	0
B2	RibE	S	UniRef50_S7X8M4: Riboflavin synthase eubacterial/eukaryotic	TOTAL	0	0	0	0	6.36444	4.31412	7.21196	4.34153	0	0	0	0
B2	RibE	S	UniRef50_S7X8M4: Riboflavin synthase eubacterial/eukaryotic	unclassified	0	0	0	0	6.36444	4.31412	7.21196	4.34153	0	0	0	0
B2	RibE	S	UniRef50_T2RGK8: 6,7-dimethyl-8-ribityllumazine synthase	TOTAL	1.14141	1.06287	0	0.766065	0.673955	1.02725	0.663149	0	0	1.01556	0	1.04905
B2	RibE	S	UniRef50_T2RGK8: 6,7-dimethyl-8-ribityllumazine synthase	unclassified	1.14141	1.06287	0	0.766065	0.673955	1.02725	0.663149	0	0	1.01556	0	1.04905
B2	RibD	D	UniRef50_V2Q1P3: Riboflavin biosynthesis protein RibF	g__Mucispirillum.s__Mucispirillum_schaedleri	0	0	0	0	1.76289	0.942209	1.88229	1.20497	3.59976	4.65705	5.99649	3.8264
B2	RibD	D	UniRef50_V2Q1P3: Riboflavin biosynthesis protein RibF	TOTAL	0	0	0	0	1.76289	0.942209	1.88229	1.20497	3.59976	4.65705	5.99649	3.8264
B2	RibD	S	UniRef50_V2Q837: Riboflavin biosynthesis protein RibD	g__Mucispirillum.s__Mucispirillum_schaedleri	0.273851	0	0	0	2.03217	1.41474	1.65462	1.19108	2.19038	5.28404	7.13755	4.09098
B2	RibD	S	UniRef50_V2Q837: Riboflavin biosynthesis protein RibD	TOTAL	0.273851	0	0	0	2.03217	1.41474	1.65462	1.19108	2.19038	5.28404	7.13755	4.09098
B2	RibB	S	UniRef50_V2QD79: 3,4-dihydroxy-2-butanone 4-phosphate synthase	g__Mucispirillum.s__Mucispirillum_schaedleri	0	0	0	0	0.543166	0.536321	0.60512	0	1.05193	1.89395	2.98659	2.22496
B2	RibB	S	UniRef50_V2QD79: 3,4-dihydroxy-2-butanone 4-phosphate synthase	TOTAL	0.269797	0	0	0	3.21439	2.99725	2.81613	2.34769	7.34006	9.85912	13.1137	9.08884
B2	RibB	S	UniRef50_V2QD79: 3,4-dihydroxy-2-butanone 4-phosphate synthase	unclassified	0.269797	0	0	0	2.67123	2.46093	2.21101	2.34769	6.28813	7.96517	10.1271	6.86388
B2	RibE	S	UniRef50_V9G483: 6,7-dimethyl-8-ribityllumazine synthase	TOTAL	0	0	0	0.280253	0	0.54459	0.443706	0	0	0	0.547199	0
B2	RibE	S	UniRef50_V9G483: 6,7-dimethyl-8-ribityllumazine synthase	unclassified	0	0	0	0.280253	0	0.54459	0.443706	0	0	0	0.547199	0
B2	ribL	D	UniRef50_W0FM45: Glycerol-3-phosphate cytidylyltransferase	TOTAL	0	0	0	0	0	0	0	0	0	0.368761	0	1.31731
B2	ribL	D	UniRef50_W0FM45: Glycerol-3-phosphate cytidylyltransferase	unclassified	0	0	0	0	0	0	0	0	0	0.368761	0	1.31731
B2	ArfB	S	UniRef50_W4P7I3: Creatinine amidohydrolase	TOTAL	0.332538	0.599989	0.732805	0	0.59173	0	0.366842	0.934696	2.69118	1.15476	1.02257	0
B2	ArfB	S	UniRef50_W4P7I3: Creatinine amidohydrolase	unclassified	0.332538	0.599989	0.732805	0	0.59173	0	0.366842	0.934696	2.69118	1.15476	1.02257	0
B2	RibD	S	UniRef50_W4P999: Diaminohydroxyphosphoribosylaminopyrimidine deaminase	TOTAL	0	0	0	0	0	0	0	0	0	0	0.253009	0
B2	RibD	S	UniRef50_W4P999: Diaminohydroxyphosphoribosylaminopyrimidine deaminase	unclassified	0	0	0	0	0	0	0	0	0	0	0.253009	0
B2	RibE	S	UniRef50_W4PFF8: Riboflavin synthase	TOTAL	2.12298	0.576914	1.01881	0.816791	7.38069	3.31697	4.819	6.17904	0.79032	0.422011	0.677919	0.274627
B2	RibE	S	UniRef50_W4PFF8: Riboflavin synthase	unclassified	2.12298	0.576914	1.01881	0.816791	7.38069	3.31697	4.819	6.17904	0.79032	0.422011	0.677919	0.274627
B2	RibD	S	UniRef50_W4PRB3: Diaminohydroxyphosphoribosylaminopyrimidine deaminase	TOTAL	0	0	0	0.464464	1.2273	0	0	0	0	0	0	0.412281
B2	RibD	S	UniRef50_W4PRB3: Diaminohydroxyphosphoribosylaminopyrimidine deaminase	unclassified	0	0	0	0.464464	1.2273	0	0	0	0	0	0	0.412281
B2	RibB	S	UniRef50_W4UWZ8: 3,4-dihydroxy-2-butanone 4-phosphate synthase	TOTAL	0	0.167606	0	0	0	0	0.236637	0	0.795545	0.345501	0	0.401454
B2	RibB	S	UniRef50_W4UWZ8: 3,4-dihydroxy-2-butanone 4-phosphate synthase	unclassified	0	0.167606	0	0	0	0	0.236637	0	0.795545	0.345501	0	0.401454
B2	RibE	S	UniRef50_W4VC23: 6,7-dimethyl-8-ribityllumazine synthase	TOTAL	0	0	0	0	0.352701	0.440445	0	0	0	0.779869	0.645447	0.859802
B2	RibE	S	UniRef50_W4VC23: 6,7-dimethyl-8-ribityllumazine synthase	unclassified	0	0	0	0	0.352701	0.440445	0	0	0	0.779869	0.645447	0.859802
B2	RibE	S	UniRef50_W4VC62: 6,7-dimethyl-8-ribityllumazine synthase	TOTAL	0	0	0	0	0	0	0	0	0.352402	0	0	0
B2	RibE	S	UniRef50_W4VC62: 6,7-dimethyl-8-ribityllumazine synthase	unclassified	0	0	0	0	0	0	0	0	0.352402	0	0	0
B3	NadA	S	UniRef50_A1BEP5: Quinolinate synthase A	g__Akkermansia.s__Akkermansia_muciniphila	0	0	0.396398	0	0.371104	0	0.522164	0	0	0	0	0.346228
B3	NadA	S	UniRef50_A1BEP5: Quinolinate synthase A	TOTAL	0	0	0.396398	0	0.371104	0	0.522164	0	0	0	0	0.346228
B3	NadA	S	UniRef50_A2C9Z7: Quinolinate synthase A	g__Bacteroides.s__Bacteroides_caecimuris	0.454992	0.652964	1.36842	0.310386	1.34678	0.64381	0.711452	0.587367	0.757349	0.238726	0.379403	0.184
B3	NadA	S	UniRef50_A2C9Z7: Quinolinate synthase A	g__Bacteroides.s__Bacteroides_dorei	0	0	0	0	0.124318	0.189335	0.412439	0	0	0	0	0
B3	NadA	S	UniRef50_A2C9Z7: Quinolinate synthase A	g__Bacteroides.s__Bacteroides_uniformis	2.37829	0.691153	0.447656	1.55158	1.05584	0.462738	0.465605	0.2617	0.597553	0.298384	0.151761	0.758998
B3	NadA	S	UniRef50_A2C9Z7: Quinolinate synthase A	g__Muribaculum.s__Muribaculum_intestinale	1.38052	1.62991	2.43543	0.912157	1.51087	0.364541	0.626853	0.842291	0	0	0	0.0219337
B3	NadA	S	UniRef50_A2C9Z7: Quinolinate synthase A	g__Parabacteroides.s__Parabacteroides_goldsteinii	0.215544	0.454479	0.373931	0.392104	0.299606	0.0571805	0.129735	0.185944	0.0654231	0.113081	0	0
B3	NadA	S	UniRef50_A2C9Z7: Quinolinate synthase A	TOTAL	4.42935	3.42851	4.62543	3.16622	4.33742	1.71761	2.34609	1.8773	1.42033	0.65019	0.531164	0.964932
B3	NadD	D	UniRef50_A8YWC9: Probable nicotinate-nucleotide adenylyltransferase	g__Lactobacillus.s__Lactobacillus_johnsonii	0	0.360716	2.01872	3.43986	0	0	0	0	0	0	0	0
B3	NadD	D	UniRef50_A8YWC9: Probable nicotinate-nucleotide adenylyltransferase	g__Lactobacillus.s__Lactobacillus_taiwanensis	0	0	0	0	0	0.692796	0.600167	0	0	0	0.277129	0
B3	NadD	D	UniRef50_A8YWC9: Probable nicotinate-nucleotide adenylyltransferase	TOTAL	0	0.360716	2.01872	3.43986	0	0.692796	0.600167	0	0	0	0.277129	0
B3	NadA	S	UniRef50_B2V9E3: Quinolinate synthase A	g__Clostridium.s__Clostridium_sp_ASF502	0.601543	0.539145	0.109514	0.0537904	0	0	0	0	0.0478667	0.0827353	0.157788	0
B3	NadA	S	UniRef50_B2V9E3: Quinolinate synthase A	g__Lachnospiraceae_unclassified.s__Lachnospiraceae_bacterium_3_2	0	0	0.0547568	0	0	0	0	0.23808	0	0	0	0
B3	NadA	S	UniRef50_B2V9E3: Quinolinate synthase A	g__Lachnospiraceae_unclassified.s__Lachnospiraceae_bacterium_A2	0.476501	0.241352	9.70243	2.57262	0	0	0	5.0011	3.68844	2.99965	0	0
B3	NadA	S	UniRef50_B2V9E3: Quinolinate synthase A	g__Lachnospiraceae_unclassified.s__Lachnospiraceae_bacterium_A4	0	0	0	1.36603	0	0	0	0	0.643022	1.29611	0.235799	0
B3	NadA	S	UniRef50_B2V9E3: Quinolinate synthase A	TOTAL	1.07804	0.780497	9.8667	3.99244	0	0	0	5.23918	4.37933	4.3785	0.393586	0
B3	NadD	D	UniRef50_C0BCH6: Putative nicotinate-nucleotide adenylyltransferase	TOTAL	0	0	0	1.56351	0	0	0	0	4.19897	1.4707	9.41941	8.70318
B3	NadD	D	UniRef50_C0BCH6: Putative nicotinate-nucleotide adenylyltransferase	unclassified	0	0	0	1.56351	0	0	0	0	4.19897	1.4707	9.41941	8.70318
B3	ppnK	D	UniRef50_C4Z0G9: NAD kinase	g__Lachnospiraceae_unclassified.s__Lachnospiraceae_bacterium_A4	0	0	0	1.81562	0	0	0	0	1.45527	3.58314	2.98964	0.64502
B3	ppnK	D	UniRef50_C4Z0G9: NAD kinase	TOTAL	0	0	0	1.81562	0	0	0	0	1.45527	3.58314	2.98964	0.64502
B3	ppnK	D	UniRef50_C4ZCY4: NAD kinase	g__Eubacterium.s__Eubacterium_plexicaudatum	0	0	0	0	0	0	0.284191	0	0	0	0	0
B3	ppnK	D	UniRef50_C4ZCY4: NAD kinase	g__Lachnospiraceae_unclassified.s__Lachnospiraceae_bacterium_A2	0	0	2.34023	0.908493	0	0	0	0.76595	0.943228	0.489033	0	0
B3	ppnK	D	UniRef50_C4ZCY4: NAD kinase	TOTAL	0	0	2.34023	0.908493	0	0	0.284191	0.76595	0.943228	0.489033	0	0
B3	PncA	S	UniRef50_C4ZE96: Amidase from nicotinamidase family	g__Anaerotruncus.s__Anaerotruncus_sp_G3_2012	0.0778596	0	0	0	0	0.189274	0	0.123153	0.0433304	0.0374472	0	0
B3	PncA	S	UniRef50_C4ZE96: Amidase from nicotinamidase family	g__Dorea.s__Dorea_sp_5_2	1.26832	13.7504	2.72984	8.5313	0.756205	1.00434	0.420688	0.314039	0.662954	1.82894	0.485528	0.748296
B3	PncA	S	UniRef50_C4ZE96: Amidase from nicotinamidase family	g__Eubacterium.s__Eubacterium_plexicaudatum	0	0	0	0	0.0500543	0.724203	0.207576	0	0	0	0	0
B3	PncA	S	UniRef50_C4ZE96: Amidase from nicotinamidase family	g__Lachnospiraceae_unclassified.s__Lachnospiraceae_bacterium_10_1	0.831472	4.20187	1.21341	1.1363	0	0	0	0.314039	0	0.267373	0	0
B3	PncA	S	UniRef50_C4ZE96: Amidase from nicotinamidase family	g__Lachnospiraceae_unclassified.s__Lachnospiraceae_bacterium_A4	0	0.221158	0	0.54473	0	0.309029	0.101988	0.188424	0	0.801949	0.67989	0.0883198
B3	PncA	S	UniRef50_C4ZE96: Amidase from nicotinamidase family	g__Lachnospiraceae_unclassified.s__Lachnospiraceae_bacterium_COE1	0	0	0	0	0.253609	0.963076	0.210344	0.188564	0.265182	2.25357	0.339945	0.880096
B3	PncA	S	UniRef50_C4ZE96: Amidase from nicotinamidase family	TOTAL	2.17765	18.1734	3.94325	10.2123	1.05987	3.18992	0.940597	1.12822	0.971466	5.18928	1.50536	1.71671
B3	PncB	S	UniRef50_C6Q0I5: Nicotinate phosphoribosyltransferase	TOTAL	0	0	0	0.469198	0	0	0	0	0	0	0	0
B3	PncB	S	UniRef50_C6Q0I5: Nicotinate phosphoribosyltransferase	unclassified	0	0	0	0.469198	0	0	0	0	0	0	0	0
B3	NadD	D	UniRef50_D3AVD0: Putative nicotinate-nucleotide adenylyltransferase (Fragment)	TOTAL	0	0	0	0	0	0	0	0	0	0.0713947	0	0
B3	NadD	D	UniRef50_D3AVD0: Putative nicotinate-nucleotide adenylyltransferase (Fragment)	unclassified	0	0	0	0	0	0	0	0	0	0.0713947	0	0
B3	NadC	S	UniRef50_D4LJ58: Nicotinate-nucleotide pyrophosphorylase	TOTAL	6.18923	2.2349	1.31153	1.91303	0.878716	1.36956	1.03541	1.13787	1.94836	0.721396	1.3372	0.938014
B3	NadC	S	UniRef50_D4LJ58: Nicotinate-nucleotide pyrophosphorylase	unclassified	6.18923	2.2349	1.31153	1.91303	0.878716	1.36956	1.03541	1.13787	1.94836	0.721396	1.3372	0.938014
B3	NadR	S	UniRef50_D7K052: Nicotinamide-nucleotide adenylyltransferase	TOTAL	0.447051	0	0	0	0	0	0	0.543739	0.268026	0	0	0
B3	NadR	S	UniRef50_D7K052: Nicotinamide-nucleotide adenylyltransferase	unclassified	0.447051	0	0	0	0	0	0	0.543739	0.268026	0	0	0
B3	PncB	S	UniRef50_F5TCA8: Nicotinate phosphoribosyltransferase	TOTAL	0	0	0	0	0	0.779873	0	0	0.555055	0	0	0
B3	PncB	S	UniRef50_F5TCA8: Nicotinate phosphoribosyltransferase	unclassified	0	0	0	0	0	0.779873	0	0	0.555055	0	0	0
B3	ppnK	D	UniRef50_G4KPR9: NAD kinase	g__Oscillibacter.s__Oscillibacter_sp_1_3	0	0	0	0	0	0	0	0	0.490515	0.339521	0.809392	0
B3	ppnK	D	UniRef50_G4KPR9: NAD kinase	TOTAL	0.248753	0.461918	0	0.751942	0.662002	0.484118	0	0.655957	1.09062	1.07746	1.21482	0.484227
B3	ppnK	D	UniRef50_G4KPR9: NAD kinase	unclassified	0.248753	0.461918	0	0.751942	0.662002	0.484118	0	0.655957	0.600104	0.737941	0.405431	0.484227
B3	NadB	S	UniRef50_H2A8M5: L-aspartate oxidase	TOTAL	0	0	0	0	0	0	0	0	0	0.303599	0	0
B3	NadB	S	UniRef50_H2A8M5: L-aspartate oxidase	unclassified	0	0	0	0	0	0	0	0	0	0.303599	0	0
B3	PncA	S	UniRef50_I4BXK1: Nicotinamidase-like amidase	TOTAL	0	0	0	0	1.86203	2.46776	0	1.84473	0.584324	0.56093	0	0
B3	PncA	S	UniRef50_I4BXK1: Nicotinamidase-like amidase	unclassified	0	0	0	0	1.86203	2.46776	0	1.84473	0.584324	0.56093	0	0
B3	PncA	S	UniRef50_I5ATZ9: Nicotinamidase-like amidase	g__Clostridium.s__Clostridium_sp_ASF502	1.24759	0	0.973599	0.248206	0	0	0	0.38194	5.64397	2.01036	1.77169	2.73016
B3	PncA	S	UniRef50_I5ATZ9: Nicotinamidase-like amidase	g__Lachnospiraceae_unclassified.s__Lachnospiraceae_bacterium_A2	0	0	2.08341	0.646742	0	0	0	0.569065	1.60147	0.999764	0	0
B3	PncA	S	UniRef50_I5ATZ9: Nicotinamidase-like amidase	g__Lachnospiraceae_unclassified.s__Lachnospiraceae_bacterium_COE1	0	0	0	0	0	0	0	0.251232	0	0.0763922	0	0
B3	PncA	S	UniRef50_I5ATZ9: Nicotinamidase-like amidase	TOTAL	1.24759	0	3.05701	0.894948	0	0	0	1.20224	7.24544	3.08652	1.77169	2.73016
B3	PncB	S	UniRef50_K1SAA1: Nicotinate phosphoribosyltransferase	TOTAL	0	0	0	0	0	0	0	0.172164	0	0	0	0
B3	PncB	S	UniRef50_K1SAA1: Nicotinate phosphoribosyltransferase	unclassified	0	0	0	0	0	0	0	0.172164	0	0	0	0
B3	NadB	S	UniRef50_K1SJJ5: L-aspartate oxidase (Fragment)	TOTAL	1.28091	2.15564	3.0915	2.36967	5.62419	4.80273	3.53559	4.05558	12.0572	8.11367	7.04958	8.57586
B3	NadB	S	UniRef50_K1SJJ5: L-aspartate oxidase (Fragment)	unclassified	1.28091	2.15564	3.0915	2.36967	5.62419	4.80273	3.53559	4.05558	12.0572	8.11367	7.04958	8.57586
B3	PncB	S	UniRef50_K1T1Z3: Nicotinate phosphoribosyltransferase (Fragment)	TOTAL	0	0	0	0	0	0	0	0	0.397774	0.387489	0	0
B3	PncB	S	UniRef50_K1T1Z3: Nicotinate phosphoribosyltransferase (Fragment)	unclassified	0	0	0	0	0	0	0	0	0.397774	0.387489	0	0
B3	NadB	S	UniRef50_K1U4Y8: L-aspartate oxidase (Fragment)	TOTAL	3.7046	0.809342	1.87981	1.49162	3.50868	1.6542	1.6662	3.87401	0.917805	0.173634	0	0.504956
B3	NadB	S	UniRef50_K1U4Y8: L-aspartate oxidase (Fragment)	unclassified	3.7046	0.809342	1.87981	1.49162	3.50868	1.6542	1.6662	3.87401	0.917805	0.173634	0	0.504956
B3	PncB	S	UniRef50_K1UKJ6: Nicotinate phosphoribosyltransferase (Fragment)	TOTAL	0	0	0	0	0	0.570812	0	0.195178	0	0	0	0
B3	PncB	S	UniRef50_K1UKJ6: Nicotinate phosphoribosyltransferase (Fragment)	unclassified	0	0	0	0	0	0.570812	0	0.195178	0	0	0	0
B3	NadR	S	UniRef50_K1USS9: Nicotinate (Nicotinamide) nucleotide adenylyltransferase (Fragment)	TOTAL	0	0	0	0	0	0	0.612532	0	0	0.600099	0	0
B3	NadR	S	UniRef50_K1USS9: Nicotinate (Nicotinamide) nucleotide adenylyltransferase (Fragment)	unclassified	0	0	0	0	0	0	0.612532	0	0	0.600099	0	0
B3	NadD	D	UniRef50_N2BJY8: Probable nicotinate-nucleotide adenylyltransferase	g__Eubacterium.s__Eubacterium_plexicaudatum	0	0	0	0	0.301317	0.200792	0.741931	0	0	0	0	0
B3	NadD	D	UniRef50_N2BJY8: Probable nicotinate-nucleotide adenylyltransferase	TOTAL	0.463812	0.582886	0	0.409621	0.301317	2.11256	1.17536	2.76308	1.36691	4.72558	12.9506	3.58161
B3	NadD	D	UniRef50_N2BJY8: Probable nicotinate-nucleotide adenylyltransferase	unclassified	0.463812	0.582886	0	0.409621	0	1.91176	0.433427	2.76308	1.36691	4.72558	12.9506	3.58161
B3	PncB	S	UniRef50_O32090: Nicotinate phosphoribosyltransferase	g__Lactobacillus.s__Lactobacillus_johnsonii	0	0	0.292719	0.415653	0	0	0	0	0	0	0	0
B3	PncB	S	UniRef50_O32090: Nicotinate phosphoribosyltransferase	g__Lactobacillus.s__Lactobacillus_murinus	0	0	0	0	0	0	0	0	0.955163	0.295694	2.28693	3.14728
B3	PncB	S	UniRef50_O32090: Nicotinate phosphoribosyltransferase	g__Lactobacillus.s__Lactobacillus_reuteri	0	0	0.0490216	0.16056	0	0.187315	0.254997	0	0	0	0	0
B3	PncB	S	UniRef50_O32090: Nicotinate phosphoribosyltransferase	g__Lactobacillus.s__Lactobacillus_taiwanensis	0	0	0	0	0	0.298409	0.338537	0	0	0	0.109424	0
B3	PncB	S	UniRef50_O32090: Nicotinate phosphoribosyltransferase	TOTAL	0	0	0.341741	0.576212	0	0.485725	0.593533	0	0.955163	0.295694	2.39636	3.14728
B3	NdhL	D	UniRef50_Q0QLF3: Nicotinate dehydrogenase small FeS subunit	TOTAL	0	0	0	0	0.356979	0	0	0	0.62172	0	0	0
B3	NdhL	D	UniRef50_Q0QLF3: Nicotinate dehydrogenase small FeS subunit	unclassified	0	0	0	0	0.356979	0	0	0	0.62172	0	0	0
B3	Hnr	D	UniRef50_Q0QLF7: 6-hydroxynicotinate reductase	TOTAL	0	0	0	0	0	0	0	0	0.66121	0	0.326203	0
B3	Hnr	D	UniRef50_Q0QLF7: 6-hydroxynicotinate reductase	unclassified	0	0	0	0	0	0	0	0	0.66121	0	0.326203	0
B3	PncB	S	UniRef50_Q7VTF7: Nicotinate phosphoribosyltransferase	g__Ralstonia.s__Ralstonia_pickettii	0	0.0303068	0	0	0	0	0	0	0	0	0	0
B3	PncB	S	UniRef50_Q7VTF7: Nicotinate phosphoribosyltransferase	g__Turicimonas.s__Turicimonas_muris	0	0.576313	0	0.517913	0.406823	0.433797	0	0	0	0	0	0
B3	PncB	S	UniRef50_Q7VTF7: Nicotinate phosphoribosyltransferase	TOTAL	0	0.60662	0	0.517913	0.406823	0.433797	0	0	0	0	0	0
B3	ppnK	D	UniRef50_Q8A0V4: NAD kinase	g__Bacteroides.s__Bacteroides_caecimuris	0.0899058	0	0.0572364	0	0	0	0.0595313	0	0	0.0432409	0	0
B3	ppnK	D	UniRef50_Q8A0V4: NAD kinase	g__Bacteroides.s__Bacteroides_dorei	0	0	0	0	0	0.304963	0.23723	0	0	0	0	0
B3	ppnK	D	UniRef50_Q8A0V4: NAD kinase	g__Bacteroides.s__Bacteroides_uniformis	0.130482	0	0	0.163138	0	0.021147	0	0	0	0.0418206	0	0
B3	ppnK	D	UniRef50_Q8A0V4: NAD kinase	g__Parabacteroides.s__Parabacteroides_goldsteinii	0.0446162	0	0.0852115	0.11161	0	0.130209	0.0590854	0	0	0.042917	0	0
B3	ppnK	D	UniRef50_Q8A0V4: NAD kinase	g__Prevotella.s__Prevotella_sp_MGM2	0.0449529	0	0.486509	0.252983	0	0	0	0	0	0	0	0
B3	ppnK	D	UniRef50_Q8A0V4: NAD kinase	TOTAL	0.309957	0	1.42814	0.527731	0.284487	0.456318	0.811677	0	0	0.127978	0	0
B3	ppnK	D	UniRef50_Q8A0V4: NAD kinase	unclassified	0	0	0.799187	0	0.284487	0	0.45583	0	0	0	0	0
B3	NadD	D	UniRef50_Q8A675: Probable nicotinate-nucleotide adenylyltransferase	g__Bacteroides.s__Bacteroides_caecimuris	0	0.0964707	0.088184	0.04323	0.0442341	0.0336877	0	0.164323	0.308276	0.133242	0	0
B3	NadD	D	UniRef50_Q8A675: Probable nicotinate-nucleotide adenylyltransferase	g__Bacteroides.s__Bacteroides_dorei	0	0	0	0	1.2349	0.139621	0.332432	0	0	0	0	0
B3	NadD	D	UniRef50_Q8A675: Probable nicotinate-nucleotide adenylyltransferase	g__Bacteroides.s__Bacteroides_uniformis	1.27634	0.427993	0.135425	0.975504	0.181149	0.0344898	0.140855	0.280281	0.197308	0.238726	0	0
B3	NadD	D	UniRef50_Q8A675: Probable nicotinate-nucleotide adenylyltransferase	g__Parabacteroides.s__Parabacteroides_goldsteinii	0.272286	0.284451	0.693378	0.0851426	0.434347	0.0331102	0.135221	0.0538353	0.49248	0.163698	0	0
B3	NadD	D	UniRef50_Q8A675: Probable nicotinate-nucleotide adenylyltransferase	TOTAL	1.54863	0.808914	0.916987	1.10388	2.44328	0.509409	0.608509	0.49844	1.46009	0.535666	0	0
B3	NadD	D	UniRef50_Q8A675: Probable nicotinate-nucleotide adenylyltransferase	unclassified	0	0	0	0	0.548646	0.2685	0	0	0.462026	0	0	0
B3	NadD	D	UniRef50_R5AS44: Probable nicotinate-nucleotide adenylyltransferase	g__Muribaculaceae_unclassified.s__Muribaculaceae_bacterium_DSM_103720	0.0704882	0.0654554	0	0.0440827	0.180077	0.512922	0.886714	1.83964	0.313825	0	0	0
B3	NadD	D	UniRef50_R5AS44: Probable nicotinate-nucleotide adenylyltransferase	g__Muribaculum.s__Muribaculum_intestinale	1.1981	2.03432	3.35337	2.05373	0.918238	0.366306	0.906569	0.974605	0.152403	0	0	0
B3	NadD	D	UniRef50_R5AS44: Probable nicotinate-nucleotide adenylyltransferase	TOTAL	1.82596	2.41581	4.61521	2.795	2.85804	1.93396	3.16822	4.70366	1.22407	0	0	0
B3	NadD	D	UniRef50_R5AS44: Probable nicotinate-nucleotide adenylyltransferase	unclassified	0.557378	0.316034	1.26185	0.697184	1.75973	1.05473	1.37494	1.88942	0.757842	0	0	0
B3	NadB	S	UniRef50_R5C7B6: L-aspartate oxidase	g__Bacteroides.s__Bacteroides_caecimuris	0.310346	0.299257	1.00282	0.0895789	0.594613	0.383182	0.537389	0.547299	0.663848	0.206543	0.233572	0.491157
B3	NadB	S	UniRef50_R5C7B6: L-aspartate oxidase	g__Bacteroides.s__Bacteroides_dorei	0	0	0	0	0.924509	0.461635	0.911176	0	0	0	0	0
B3	NadB	S	UniRef50_R5C7B6: L-aspartate oxidase	g__Bacteroides.s__Bacteroides_uniformis	3.52087	1.0197	0.668683	1.9251	0.85326	0.534135	0.663901	0.736212	1.16899	0.688908	0.262769	1.00845
B3	NadB	S	UniRef50_R5C7B6: L-aspartate oxidase	g__Muribaculaceae_unclassified.s__Muribaculaceae_bacterium_DSM_103720	0.437257	0.175587	0.586833	0.369533	2.20326	1.95438	1.1264	4.33632	0.368308	0.136415	0.144534	0
B3	NadB	S	UniRef50_R5C7B6: L-aspartate oxidase	g__Muribaculum.s__Muribaculum_intestinale	2.54069	2.39228	3.93617	2.17275	1.54543	0.349594	0.872896	0.701376	0.120052	0.0691603	0.014657	0.0533118
B3	NadB	S	UniRef50_R5C7B6: L-aspartate oxidase	g__Parabacteroides.s__Parabacteroides_goldsteinii	0.0956748	0.222128	0.578685	0.268905	0.335916	0.139621	0.459336	0.151344	0.425995	0.0230097	0	0
B3	NadB	S	UniRef50_R5C7B6: L-aspartate oxidase	g__Prevotella.s__Prevotella_sp_MGM2	0.235891	0.0547622	0.916026	0.309782	0	0.206522	0	0	0.236292	0.102108	0.115399	0.406315
B3	NadB	S	UniRef50_R5C7B6: L-aspartate oxidase	TOTAL	11.0816	5.1108	9.36445	6.48389	16.0675	8.8028	11.5854	14.4183	3.72364	1.22614	0.770931	2.42189
B3	NadB	S	UniRef50_R5C7B6: L-aspartate oxidase	unclassified	3.94089	0.94709	1.67523	1.34823	9.6105	4.77373	7.01431	7.94573	0.74016	0	0	0.462649
B3	ppnK	D	UniRef50_R5HN26: NAD kinase	g__Firmicutes_unclassified.s__Firmicutes_bacterium_ASF500	0	0	0	0.448119	0	0.28318	0	0	0	0	0	0
B3	ppnK	D	UniRef50_R5HN26: NAD kinase	TOTAL	0	0.527163	0	0.921289	0.618023	1.10163	0.362014	0	0.935798	0.444755	0	0.327496
B3	ppnK	D	UniRef50_R5HN26: NAD kinase	unclassified	0	0.527163	0	0.47317	0.618023	0.818451	0.362014	0	0.935798	0.444755	0	0.327496
B3	PncB	S	UniRef50_R5NHS2: Nicotinate phosphoribosyltransferase	TOTAL	0	0	0	0	0	0	0	0	4.24217	0	0	0
B3	PncB	S	UniRef50_R5NHS2: Nicotinate phosphoribosyltransferase	unclassified	0	0	0	0	0	0	0	0	4.24217	0	0	0
B3	NadC	S	UniRef50_R5W582: Nicotinate-nucleotide pyrophosphorylase (Carboxylating)	g__Bacteroides.s__Bacteroides_caecimuris	0.577127	0.535921	1.52746	0.433138	1.85775	1.97635	2.96365	0.620728	1.82441	0.31087	0.7341	1.02697
B3	NadC	S	UniRef50_R5W582: Nicotinate-nucleotide pyrophosphorylase (Carboxylating)	g__Bacteroides.s__Bacteroides_dorei	0	0	0	0	0.352506	0.178974	1.06585	0	0	0	0	0
B3	NadC	S	UniRef50_R5W582: Nicotinate-nucleotide pyrophosphorylase (Carboxylating)	g__Bacteroides.s__Bacteroides_uniformis	4.06318	0.963998	1.32268	3.08972	1.1795	0.942554	0.794787	1.05892	1.28476	0.865623	0.621162	1.92558
B3	NadC	S	UniRef50_R5W582: Nicotinate-nucleotide pyrophosphorylase (Carboxylating)	g__Muribaculaceae_unclassified.s__Muribaculaceae_bacterium_DSM_103720	0.18469	0.128628	0.705472	0.115504	0.736347	1.07656	0.886625	3.10383	0.23123	0.177656	0.0564692	0
B3	NadC	S	UniRef50_R5W582: Nicotinate-nucleotide pyrophosphorylase (Carboxylating)	g__Muribaculum.s__Muribaculum_intestinale	3.22139	1.95808	4.72069	2.95673	2.39782	0.496009	2.54456	1.02662	0.103184	0.17738	0	0
B3	NadC	S	UniRef50_R5W582: Nicotinate-nucleotide pyrophosphorylase (Carboxylating)	g__Parabacteroides.s__Parabacteroides_goldsteinii	0.233579	0.823918	1.27736	0.701174	1.01363	0.295395	0.865645	0.516906	0.44197	0.13481	0	0
B3	NadC	S	UniRef50_R5W582: Nicotinate-nucleotide pyrophosphorylase (Carboxylating)	g__Prevotella.s__Prevotella_sp_MGM2	0	0.364891	1.02695	0.776009	0	0	0	0	0.0230192	0.0397876	0.252935	0.184
B3	NadC	S	UniRef50_R5W582: Nicotinate-nucleotide pyrophosphorylase (Carboxylating)	TOTAL	8.27997	4.77544	10.5806	8.07227	7.53755	4.96584	9.12112	7.89552	5.65777	2.59154	1.66467	3.13655
B3	NadC	S	UniRef50_R5W582: Nicotinate-nucleotide pyrophosphorylase (Carboxylating)	unclassified	0	0	0	0	0	0	0	1.5685	1.7492	0.885411	0	0
B3	ppnK	D	UniRef50_R6A0F7: NAD kinase	g__Turicimonas.s__Turicimonas_muris	0	0.334505	0	0.720966	1.34925	0	1.14498	0.607818	0	0	0	0
B3	ppnK	D	UniRef50_R6A0F7: NAD kinase	TOTAL	0	0.334505	0	0.720966	1.34925	0	1.14498	0.607818	0	0	0	0
B3	PncB	S	UniRef50_R6E1W5: Nicotinate phosphoribosyltransferase	TOTAL	0	0	0	0.753778	0	0.251642	0	0	1.43972	0.879906	1.20508	1.60682
B3	PncB	S	UniRef50_R6E1W5: Nicotinate phosphoribosyltransferase	unclassified	0	0	0	0.753778	0	0.251642	0	0	1.43972	0.879906	1.20508	1.60682
B3	PncB	S	UniRef50_R6HXF6: Nicotinate phosphoribosyltransferase	TOTAL	1.08852	1.45726	1.33305	1.59735	2.26351	4.78662	1.32968	2.37202	3.93745	3.05471	2.86866	2.7156
B3	PncB	S	UniRef50_R6HXF6: Nicotinate phosphoribosyltransferase	unclassified	1.08852	1.45726	1.33305	1.59735	2.26351	4.78662	1.32968	2.37202	3.93745	3.05471	2.86866	2.7156
B3	PncB	S	UniRef50_R6Z3F6: Nicotinate phosphoribosyltransferase	TOTAL	0.985619	2.28633	0	0	3.01953	4.18965	1.84986	6.01481	1.33071	2.87982	3.34731	3.4614
B3	PncB	S	UniRef50_R6Z3F6: Nicotinate phosphoribosyltransferase	unclassified	0.985619	2.28633	0	0	3.01953	4.18965	1.84986	6.01481	1.33071	2.87982	3.34731	3.4614
B3	NadD	D	UniRef50_R6ZS37: Probable nicotinate-nucleotide adenylyltransferase	TOTAL	0	0	0	0	0	0	0	0	0	2.01077	1.00867	0
B3	NadD	D	UniRef50_R6ZS37: Probable nicotinate-nucleotide adenylyltransferase	unclassified	0	0	0	0	0	0	0	0	0	2.01077	1.00867	0
B3	PncB	S	UniRef50_R6ZY64: Nicotinate phosphoribosyltransferase	TOTAL	0.445778	6.5273	2.37931	2.14324	6.16878	4.49855	3.74059	5.66481	1.96305	4.1623	3.12657	1.82149
B3	PncB	S	UniRef50_R6ZY64: Nicotinate phosphoribosyltransferase	unclassified	0.445778	6.5273	2.37931	2.14324	6.16878	4.49855	3.74059	5.66481	1.96305	4.1623	3.12657	1.82149
B3	ppnK	D	UniRef50_R7C4L3: NAD kinase	TOTAL	0	0	0	0	0	0.561649	0	0	0	0.256355	0	0
B3	ppnK	D	UniRef50_R7C4L3: NAD kinase	unclassified	0	0	0	0	0	0.561649	0	0	0	0.256355	0	0
B3	PncB	S	UniRef50_R7EWQ3: Nicotinate phosphoribosyltransferase	TOTAL	0.42433	0.13169	0.179145	0	0.179723	0.547509	0.557553	1.55963	0	0	0	0
B3	PncB	S	UniRef50_R7EWQ3: Nicotinate phosphoribosyltransferase	unclassified	0.42433	0.13169	0.179145	0	0.179723	0.547509	0.557553	1.55963	0	0	0	0
B3	NadB	S	UniRef50_R7KUB3: L-aspartate oxidase	TOTAL	16.5436	4.50882	7.93736	8.0757	17.1751	10.0645	8.69249	18.8517	4.04035	2.79557	2.17874	3.2678
B3	NadB	S	UniRef50_R7KUB3: L-aspartate oxidase	unclassified	16.5436	4.50882	7.93736	8.0757	17.1751	10.0645	8.69249	18.8517	4.04035	2.79557	2.17874	3.2678
B3	NadB	S	UniRef50_R7L328: L-aspartate oxidase	TOTAL	0	0	0	0	0	0.310352	0	0	0	0	0	0
B3	NadB	S	UniRef50_R7L328: L-aspartate oxidase	unclassified	0	0	0	0	0	0.310352	0	0	0	0	0	0
B3	NadD	D	UniRef50_R7QYG2: Probable nicotinate-nucleotide adenylyltransferase	TOTAL	0	0	0	0	0	0	0	0	0	0	1.7394	0
B3	NadD	D	UniRef50_R7QYG2: Probable nicotinate-nucleotide adenylyltransferase	unclassified	0	0	0	0	0	0	0	0	0	0	1.7394	0
B3	NadD	D	UniRef50_R7R334: Probable nicotinate-nucleotide adenylyltransferase	g__Lachnospiraceae_unclassified.s__Lachnospiraceae_bacterium_A4	0	0	0	1.56332	0	0.197533	0	0.160588	3.95505	14.152	7.48994	3.76314
B3	NadD	D	UniRef50_R7R334: Probable nicotinate-nucleotide adenylyltransferase	g__Lachnospiraceae_unclassified.s__Lachnospiraceae_bacterium_COE1	0	0	0	0	0	0.129481	0	0.789485	0.370366	0.512127	0.0813914	0.222033
B3	NadD	D	UniRef50_R7R334: Probable nicotinate-nucleotide adenylyltransferase	TOTAL	0	0	0	1.56332	0	0.327014	0	0.950073	4.32542	14.6642	7.57133	3.98517
B3	ppnK	D	UniRef50_R7R6R2: NAD kinase	TOTAL	0	1.34231	0	0	0.756575	1.0831	0.843128	1.10141	0.408762	1.21032	0.556941	0.43722
B3	ppnK	D	UniRef50_R7R6R2: NAD kinase	unclassified	0	1.34231	0	0	0.756575	1.0831	0.843128	1.10141	0.408762	1.21032	0.556941	0.43722
B3	ppnK	D	UniRef50_R9L753: NAD kinase	g__Lachnospiraceae_unclassified.s__Lachnospiraceae_bacterium_COE1	0	0	0	0	0	0	0	0.61276	0	0	0	0
B3	ppnK	D	UniRef50_R9L753: NAD kinase	TOTAL	0.760831	4.96431	0	0	2.42034	4.35189	0.961847	4.80452	0.862497	0.901076	1.39435	1.60045
B3	ppnK	D	UniRef50_R9L753: NAD kinase	unclassified	0.760831	4.96431	0	0	2.42034	4.35189	0.961847	4.19176	0.862497	0.901076	1.39435	1.60045
B3	PncB	S	UniRef50_V2QF45: Nicotinate phosphoribosyltransferase	g__Mucispirillum.s__Mucispirillum_schaedleri	0.277849	0	0	0	1.88602	1.85979	2.13186	1.72258	3.90543	6.14447	6.68971	6.80762
B3	PncB	S	UniRef50_V2QF45: Nicotinate phosphoribosyltransferase	TOTAL	0.277849	0	0	0	1.88602	1.85979	2.13186	1.72258	3.90543	6.14447	6.68971	6.80762
B3	ppnK	D	UniRef50_V2RH98: NAD kinase	g__Mucispirillum.s__Mucispirillum_schaedleri	0	0	0	0	1.95267	1.08651	0.663946	0.72193	2.71783	4.91607	4.37985	4.23585
B3	ppnK	D	UniRef50_V2RH98: NAD kinase	TOTAL	0	0	0	0	1.95267	1.08651	0.663946	0.72193	2.71783	4.91607	4.37985	4.23585
B3	NadD	D	UniRef50_V2RIF7: Probable nicotinate-nucleotide adenylyltransferase	g__Mucispirillum.s__Mucispirillum_schaedleri	0	0	0	0	0.5555	0	0	0	0.48418	1.64012	1.10496	0.855908
B3	NadD	D	UniRef50_V2RIF7: Probable nicotinate-nucleotide adenylyltransferase	TOTAL	0	0	0	0	0.5555	0	0	0	0.48418	1.64012	1.10496	0.855908
B3	NadB	S	UniRef50_W0FNY9: L-aspartate oxidase	TOTAL	3.66111	6.3536	3.55681	7.24595	1.97601	0.680595	0	1.10639	2.44355	1.03315	2.68685	2.05521
B3	NadB	S	UniRef50_W0FNY9: L-aspartate oxidase	unclassified	3.66111	6.3536	3.55681	7.24595	1.97601	0.680595	0	1.10639	2.44355	1.03315	2.68685	2.05521
B3	PncB	S	UniRef50_W1V852: Nicotinate phosphoribosyltransferase (Fragment)	TOTAL	0	0	0	0	0	0	0	0	0	0	0.632315	0
B3	PncB	S	UniRef50_W1V852: Nicotinate phosphoribosyltransferase (Fragment)	unclassified	0	0	0	0	0	0	0	0	0	0	0.632315	0
B3	NadR	S	UniRef50_W4PUY6: Ribosylnicotinamide kinase homolog	TOTAL	0	0	0	0	1.45003	0.999076	0	1.19684	0	0	0	0
B3	NadR	S	UniRef50_W4PUY6: Ribosylnicotinamide kinase homolog	unclassified	0	0	0	0	1.45003	0.999076	0	1.19684	0	0	0	0
B3	NadR	S	UniRef50_W4UR38: Ribosylnicotinamide kinase homolog	TOTAL	0.605115	0.53353	1.40052	0	0.672358	0.788949	0.559466	0.937119	0.581436	0	0	0
B3	NadR	S	UniRef50_W4UR38: Ribosylnicotinamide kinase homolog	unclassified	0.605115	0.53353	1.40052	0	0.672358	0.788949	0.559466	0.937119	0.581436	0	0	0
B5	PanB	S	UniRef50_A1WDW4: 3-methyl-2-oxobutanoate hydroxymethyltransferase	g__Desulfovibrionaceae_unclassified.s__Desulfovibrionaceae_bacterium	0	0	0	0	0	0	0	0	0.85459	0.492343	1.2213	0.827897
B5	PanB	S	UniRef50_A1WDW4: 3-methyl-2-oxobutanoate hydroxymethyltransferase	TOTAL	0	0	0	0	0	0	0	0	0.85459	0.492343	1.2213	0.827897
B5	PanB	S	UniRef50_A5N5W0: 3-methyl-2-oxobutanoate hydroxymethyltransferase	TOTAL	0.742102	0	0	1.7786	0	0.787242	0	0	0	1.99193	0	0
B5	PanB	S	UniRef50_A5N5W0: 3-methyl-2-oxobutanoate hydroxymethyltransferase	unclassified	0.742102	0	0	1.7786	0	0.787242	0	0	0	1.99193	0	0
B5	PanC	S	UniRef50_A6GVV3: Pantothenate synthetase	g__Bacteroides.s__Bacteroides_dorei	0	0	0	0	0.501281	0.089834	0.428026	0	0	0	0	0
B5	PanC	S	UniRef50_A6GVV3: Pantothenate synthetase	g__Bacteroides.s__Bacteroides_uniformis	2.12232	0.678101	0.232454	1.11307	0.641272	0.399606	0.211553	0	0.558241	0.878071	0.251191	1.29365
B5	PanC	S	UniRef50_A6GVV3: Pantothenate synthetase	TOTAL	2.12232	0.678101	0.232454	1.11307	1.14255	0.48944	0.639579	0	0.558241	0.878071	0.251191	1.29365
B5	CoaD	D	UniRef50_A6KZR2: Phosphopantetheine adenylyltransferase	g__Bacteroides.s__Bacteroides_dorei	0	0	0	0	0.299538	0.364995	0.683204	0	0	0	0	0
B5	CoaD	S	UniRef50_A6KZR2: Phosphopantetheine adenylyltransferase	TOTAL	0	0	0	0	0.299538	0.364995	0.683204	0	0	0	0	0
B5	PanK	D	UniRef50_B0P7C1: Type III pantothenate kinase	g__Anaerotruncus.s__Anaerotruncus_sp_G3_2012	0	0	0	0	0	0	0	0	0	0	0.457188	0
B5	PanK	D	UniRef50_B0P7C1: Type III pantothenate kinase	TOTAL	0	0	0	0	0	0	0	0	0	0	0.457188	0
B5	CoaE	D	UniRef50_B2GDB9: Dephospho-CoA kinase	g__Lactobacillus.s__Lactobacillus_reuteri	0	0	0	0	0	0.527218	0.225369	0	0	0	0	0
B5	CoaE	S	UniRef50_B2GDB9: Dephospho-CoA kinase	TOTAL	0	0	0	0	0	0.527218	0.225369	0	0	0	0	0
B5	PanK	D	UniRef50_B2GEA0: Pantothenate kinase	g__Lactobacillus.s__Lactobacillus_murinus	0	0	0	0	0	0	0	0	0.352635	0.223464	0.749118	1.50285
B5	PanK	D	UniRef50_B2GEA0: Pantothenate kinase	g__Lactobacillus.s__Lactobacillus_reuteri	0	0	0	0	0	0	0	0	0	0.0202453	0	0
B5	PanK	D	UniRef50_B2GEA0: Pantothenate kinase	TOTAL	0	0	0	0	0	0	0	0	0.352635	0.243709	0.749118	1.50285
B5	CoaD	D	UniRef50_B2RL67: Phosphopantetheine adenylyltransferase	g__Muribaculaceae_unclassified.s__Muribaculaceae_bacterium_DSM_103720	0	0	0.11943	0.117322	0	0.0456243	0	0.89019	0.156603	0	0	0
B5	CoaD	D	UniRef50_B2RL67: Phosphopantetheine adenylyltransferase	g__Prevotella.s__Prevotella_sp_MGM2	0	0	0.489279	0.597163	0	0.0934563	0	0	0.26732	0	0	0
B5	CoaD	S	UniRef50_B2RL67: Phosphopantetheine adenylyltransferase	TOTAL	0	0	0.608709	0.714486	0	0.139081	0	0.89019	0.423924	0	0	0
B5	PanC	S	UniRef50_B2UND0: Pantothenate synthetase	g__Akkermansia.s__Akkermansia_muciniphila	0	0	0.855762	0	0.296041	0	0.890075	0	0	0	0	0
B5	PanC	S	UniRef50_B2UND0: Pantothenate synthetase	TOTAL	0	0	0.855762	0	0.296041	0	0.890075	0	0	0	0	0
B5	PanK	D	UniRef50_B2UQS1: Type III pantothenate kinase	g__Akkermansia.s__Akkermansia_muciniphila	0	0	0.869704	0	0	0	0.434196	0	0	0	0	0
B5	PanK	D	UniRef50_B2UQS1: Type III pantothenate kinase	TOTAL	0	0	0.869704	0	0	0	0.434196	0	0	0	0	0
B5	PanD	S	UniRef50_B6WV89: Aspartate 1-decarboxylase	g__Mucispirillum.s__Mucispirillum_schaedleri	0.504768	0	0	0	1.03163	0.883875	0	0.558884	0.558259	2.03547	1.29623	2.2451
B5	PanD	S	UniRef50_B6WV89: Aspartate 1-decarboxylase	TOTAL	0.504768	0	0	0	1.03163	0.883875	0	0.558884	0.558259	2.03547	1.29623	2.2451
B5	CoaBC	S	UniRef50_B7BAZ4: Phosphopantothenoylcysteine decarboxylase/phosphopantothenate--cysteine ligase	TOTAL	2.37656	0.744761	0.409936	0.39734	1.72056	0.619443	0.637656	1.34809	0.353583	0.153467	0	1.23889
B5	CoaBC	D	UniRef50_B7BAZ4: Phosphopantothenoylcysteine decarboxylase/phosphopantothenate--cysteine ligase	unclassified	2.37656	0.744761	0.409936	0.39734	1.72056	0.619443	0.637656	1.34809	0.353583	0.153467	0	1.23889
B5	PanC	S	UniRef50_B9MEY7: Pantothenate synthetase	g__Ralstonia.s__Ralstonia_pickettii	0	0.128296	0	0	0	0	0	0	0	0	0	0
B5	PanC	S	UniRef50_B9MEY7: Pantothenate synthetase	g__Turicimonas.s__Turicimonas_muris	0	0.295549	0.434151	0.653969	0.813022	0	0	0	0	0	0	0
B5	PanC	S	UniRef50_B9MEY7: Pantothenate synthetase	TOTAL	0	0.423845	0.434151	0.653969	0.813022	0	0	0	0	0	0	0
B5	PanB	S	UniRef50_C0BKA7: 3-methyl-2-oxobutanoate hydroxymethyltransferase	TOTAL	0.737947	0	0	0.711807	2.20819	0.730589	0.778007	1.1047	0.761832	0.669485	0.433976	0
B5	PanB	S	UniRef50_C0BKA7: 3-methyl-2-oxobutanoate hydroxymethyltransferase	unclassified	0.737947	0	0	0.711807	2.20819	0.730589	0.778007	1.1047	0.761832	0.669485	0.433976	0
B5	GadA	S	UniRef50_D4VKR6: Glutamate decarboxylase	TOTAL	0.164464	2.48286	3.89937	0	11.2411	7.20284	6.12554	7.57914	0.580001	0.195405	0	0
B5	GadA	S	UniRef50_D4VKR6: Glutamate decarboxylase	unclassified	0.164464	2.48286	3.89937	0	11.2411	7.20284	6.12554	7.57914	0.580001	0.195405	0	0
B5	CoaE	D	UniRef50_E0RWH5: Dephospho-CoA kinase	g__Lachnospiraceae_unclassified.s__Lachnospiraceae_bacterium_10_1	0.650396	3.39954	1.56898	0.767906	0	0	0	0	0	0	0	0
B5	CoaE	D	UniRef50_E0RWH5: Dephospho-CoA kinase	g__Lachnospiraceae_unclassified.s__Lachnospiraceae_bacterium_28_4	0	0	0	0	0	0	0	0	7.69262	0.197566	11.8409	10.3135
B5	CoaE	S	UniRef50_E0RWH5: Dephospho-CoA kinase	TOTAL	0.650396	3.39954	1.56898	0.767906	0	0	0	0	7.69262	0.197566	11.8409	10.3135
B5	PanE	S	UniRef50_E6SMY0: 2-dehydropantoate 2-reductase	TOTAL	0	0	0	0	2.92523	1.4311	0.584068	2.36069	0.609983	0	0	0.378203
B5	PanE	S	UniRef50_E6SMY0: 2-dehydropantoate 2-reductase	unclassified	0	0	0	0	2.92523	1.4311	0.584068	2.36069	0.609983	0	0	0.378203
B5	PanB	S	UniRef50_E8JR45: 3-methyl-2-oxobutanoate hydroxymethyltransferase	TOTAL	0	0.640238	0	1.08923	0.60159	0	0	0.943477	0.464869	0.645881	0.618146	0
B5	PanB	S	UniRef50_E8JR45: 3-methyl-2-oxobutanoate hydroxymethyltransferase	unclassified	0	0.640238	0	1.08923	0.60159	0	0	0.943477	0.464869	0.645881	0.618146	0
B5	CoaD	S	UniRef50_F3N095: Phosphopantetheine adenylyltransferase	TOTAL	3.71528	0	3.03039	0	0	0.144857	0	0.23553	0	0	0	0
B5	CoaD	D	UniRef50_F3N095: Phosphopantetheine adenylyltransferase	unclassified	3.71528	0	3.03039	0	0	0.144857	0	0.23553	0	0	0	0
B5	GadA	S	UniRef50_F4SQQ6: Glutamate decarboxylase alpha (GAD-alpha)	TOTAL	0	0	0	0	0.126804	0	0	0	0	0	0	0.2208
B5	GadA	S	UniRef50_F4SQQ6: Glutamate decarboxylase alpha (GAD-alpha)	unclassified	0	0	0	0	0.126804	0	0	0	0	0	0	0.2208
B5	PanD	S	UniRef50_F5SF20: Aspartate 1-decarboxylase	TOTAL	0	0	0	0	0.806505	1.14457	0.918979	1.1351	0	0.0801485	0	0
B5	PanD	S	UniRef50_F5SF20: Aspartate 1-decarboxylase	unclassified	0	0	0	0	0.806505	1.14457	0.918979	1.1351	0	0.0801485	0	0
B5	CoaBC	S	UniRef50_G1W9X1: Phosphopantothenoylcysteine decarboxylase/phosphopantothenate-cysteine ligase	TOTAL	0	0	0	0	0	0	0	1.66686	0	0	0	0
B5	CoaBC	D	UniRef50_G1W9X1: Phosphopantothenoylcysteine decarboxylase/phosphopantothenate-cysteine ligase	unclassified	0	0	0	0	0	0	0	1.66686	0	0	0	0
B5	CoaD	D	UniRef50_G4KXZ6: Phosphopantetheine adenylyltransferase	g__Oscillibacter.s__Oscillibacter_sp_1_3	0	0	0	0	0	0	0	0	1.04718	0.94651	0	0
B5	CoaD	S	UniRef50_G4KXZ6: Phosphopantetheine adenylyltransferase	TOTAL	0.225711	0.733953	0	0.471021	0.817698	0.329361	0.249092	0.892912	2.0944	1.81558	0.782518	0.627978
B5	CoaD	D	UniRef50_G4KXZ6: Phosphopantetheine adenylyltransferase	unclassified	0.225711	0.733953	0	0.471021	0.817698	0.329361	0.249092	0.892912	1.04721	0.869071	0.782518	0.627978
B5	PanE	S	UniRef50_G5HNM1: 2-dehydropantoate 2-reductase	TOTAL	0.58278	0.413777	0	0	0	0	0	0	0	0	0	0
B5	PanE	S	UniRef50_G5HNM1: 2-dehydropantoate 2-reductase	unclassified	0.58278	0.413777	0	0	0	0	0	0	0	0	0	0
B5	PanB	S	UniRef50_H1DBQ6: 3-methyl-2-oxobutanoate hydroxymethyltransferase	TOTAL	2.36132	0	0	0	0	1.2508	0.836216	0.872226	0	1.81292	3.82371	1.86551
B5	PanB	S	UniRef50_H1DBQ6: 3-methyl-2-oxobutanoate hydroxymethyltransferase	unclassified	2.36132	0	0	0	0	1.2508	0.836216	0.872226	0	1.81292	3.82371	1.86551
B5	CoaBC	D	UniRef50_I4AKP9: Phosphopantothenoylcysteine decarboxylase/phosphopantothenate--cysteine ligase	g__Bacteroides.s__Bacteroides_caecimuris	0.251952	0.102147	0.541701	0.197072	0.381805	0.306576	0.208675	0.523399	0.77127	0.0757859	0.115099	0.157729
B5	CoaBC	D	UniRef50_I4AKP9: Phosphopantothenoylcysteine decarboxylase/phosphopantothenate--cysteine ligase	g__Bacteroides.s__Bacteroides_dorei	0	0	0	0	0.670943	0.154928	0.695549	0	0	0	0	0
B5	CoaBC	D	UniRef50_I4AKP9: Phosphopantothenoylcysteine decarboxylase/phosphopantothenate--cysteine ligase	g__Bacteroides.s__Bacteroides_uniformis	0.866365	0.201127	0.295474	0.831217	0.474281	0.2859	0.368785	0.220235	0.223855	0.208342	0.0756834	0.326898
B5	CoaBC	D	UniRef50_I4AKP9: Phosphopantothenoylcysteine decarboxylase/phosphopantothenate--cysteine ligase	g__Muribaculaceae_unclassified.s__Muribaculaceae_bacterium_DSM_103720	0.124413	0	0.0396022	0.0194516	0.476723	0.741293	0.329521	1.82024	0.294247	0	0.0570424	0
B5	CoaBC	D	UniRef50_I4AKP9: Phosphopantothenoylcysteine decarboxylase/phosphopantothenate--cysteine ligase	g__Muribaculum.s__Muribaculum_intestinale	1.35513	2.4728	4.33268	3.46812	3.8639	1.21095	3.0675	2.16835	0.035077	0.0606287	0	0
B5	CoaBC	D	UniRef50_I4AKP9: Phosphopantothenoylcysteine decarboxylase/phosphopantothenate--cysteine ligase	g__Parabacteroides.s__Parabacteroides_goldsteinii	0.158411	0.323203	0.423547	0.634006	0.364207	0.246566	0.125871	0.175394	0.317341	0.076189	0	0
B5	CoaBC	D	UniRef50_I4AKP9: Phosphopantothenoylcysteine decarboxylase/phosphopantothenate--cysteine ligase	g__Prevotella.s__Prevotella_sp_MGM2	0.122809	0.171061	0.937432	0.825625	0	0.0597349	0	0	0.119605	0.0295331	0.375395	0.256082
B5	CoaBC	S	UniRef50_I4AKP9: Phosphopantothenoylcysteine decarboxylase/phosphopantothenate--cysteine ligase	TOTAL	2.87908	3.27033	6.57043	5.97549	6.23186	3.00595	4.7959	4.90761	1.76139	0.450479	0.623219	0.740709
B5	PanB	S	UniRef50_J9CKF5: 3-methyl-2-oxobutanoate hydroxymethyltransferase	TOTAL	1.90956	1.20619	0	0.999222	4.36245	2.66813	1.97428	4.269	1.70014	1.02776	0	1.26362
B5	PanB	S	UniRef50_J9CKF5: 3-methyl-2-oxobutanoate hydroxymethyltransferase	unclassified	1.90956	1.20619	0	0.999222	4.36245	2.66813	1.97428	4.269	1.70014	1.02776	0	1.26362
B5	PanC	S	UniRef50_J9FR14: Pantoate--beta-alanine ligase	TOTAL	0	0.310149	0.212136	0	0	0	0	0	0	0	0.360504	0.278147
B5	PanC	S	UniRef50_J9FR14: Pantoate--beta-alanine ligase	unclassified	0	0.310149	0.212136	0	0	0	0	0	0	0	0.360504	0.278147
B5	PanB	S	UniRef50_J9GLD5: 3-methyl-2-oxobutanoate hydroxymethyltransferase	TOTAL	1.80045	0	0	1.97992	5.15115	2.89256	2.77666	5.55786	2.08593	1.35202	0	0
B5	PanB	S	UniRef50_J9GLD5: 3-methyl-2-oxobutanoate hydroxymethyltransferase	unclassified	1.80045	0	0	1.97992	5.15115	2.89256	2.77666	5.55786	2.08593	1.35202	0	0
B5	GadA	S	UniRef50_K1RI66: Glutamate decarboxylase (Fragment)	TOTAL	0.23616	1.89655	3.50585	0	5.01293	2.47573	1.51669	1.61487	0.526874	0.113081	0	0
B5	GadA	S	UniRef50_K1RI66: Glutamate decarboxylase (Fragment)	unclassified	0.23616	1.89655	3.50585	0	5.01293	2.47573	1.51669	1.61487	0.526874	0.113081	0	0
B5	PanE	S	UniRef50_K1SKI3: Ketopantoate reductase	TOTAL	0.258036	0	0	0	0	0	0	0	0	0	0	0
B5	PanE	S	UniRef50_K1SKI3: Ketopantoate reductase	unclassified	0.258036	0	0	0	0	0	0	0	0	0	0	0
B5	GadA	S	UniRef50_K1TRT9: Glutamate decarboxylase (Fragment)	TOTAL	0.189626	1.92575	2.45542	0	5.51673	3.19466	2.67812	3.41817	0	0	0	0
B5	GadA	S	UniRef50_K1TRT9: Glutamate decarboxylase (Fragment)	unclassified	0.189626	1.92575	2.45542	0	5.51673	3.19466	2.67812	3.41817	0	0	0	0
B5	PanB	S	UniRef50_M5RCM5: Ketopantoate hydroxymethyltransferase (Fragment)	TOTAL	0.468868	0.723964	0	0	0	0.152481	0	0	0	0	0	0.1728
B5	PanB	S	UniRef50_M5RCM5: Ketopantoate hydroxymethyltransferase (Fragment)	unclassified	0.468868	0.723964	0	0	0	0.152481	0	0	0	0	0	0.1728
B5	PanB	S	UniRef50_Q29W37: 3-methyl-2-oxobutanoate hydroxymethyltransferase	g__Mucispirillum.s__Mucispirillum_schaedleri	0.409912	0	0	0	1.07805	0.445683	0.319348	1.18131	1.77017	4.4289	5.16071	3.80714
B5	PanB	S	UniRef50_Q29W37: 3-methyl-2-oxobutanoate hydroxymethyltransferase	TOTAL	0.409912	0	0	0	1.07805	0.445683	0.319348	1.18131	1.77017	4.4289	5.16071	3.80714
B5	CoaE	D	UniRef50_Q5FIV9: Dephospho-CoA kinase	g__Lactobacillus.s__Lactobacillus_johnsonii	0	0	1.13321	2.05381	0	0	0	0	0	0	0	0
B5	CoaE	D	UniRef50_Q5FIV9: Dephospho-CoA kinase	g__Lactobacillus.s__Lactobacillus_taiwanensis	0	0	0	0	0	0.699311	1.76612	0.433158	0	0	0	0
B5	CoaE	S	UniRef50_Q5FIV9: Dephospho-CoA kinase	TOTAL	0	0	1.13321	2.05381	0	0.699311	1.76612	0.433158	0	0	0	0
B5	CoaD	D	UniRef50_Q5ZY26: Phosphopantetheine adenylyltransferase	g__Lachnospiraceae_unclassified.s__Lachnospiraceae_bacterium_A4	0	0	0	0.696632	0	3.4598	0	0	0.810808	4.82126	2.66845	2.19211
B5	CoaD	S	UniRef50_Q5ZY26: Phosphopantetheine adenylyltransferase	TOTAL	0	0	0	0.696632	0	3.4598	0	0	0.810808	4.82126	2.66845	2.19211
B5	CoaD	D	UniRef50_Q74JV6: Phosphopantetheine adenylyltransferase	g__Lactobacillus.s__Lactobacillus_johnsonii	0	0	0	0.314788	0	0	0	0	0	0	0	0
B5	CoaD	S	UniRef50_Q74JV6: Phosphopantetheine adenylyltransferase	TOTAL	0	0	0	0.314788	0	0	0	0	0	0	0	0
B5	PanC	S	UniRef50_Q89ZR8: Pantothenate synthetase	g__Bacteroides.s__Bacteroides_caecimuris	0.324465	0.064564	0.678708	0.0579014	0.207229	0.225459	0.398999	0.4399	0.515851	0.289815	0.198411	0
B5	PanC	S	UniRef50_Q89ZR8: Pantothenate synthetase	g__Muribaculaceae_unclassified.s__Muribaculaceae_bacterium_DSM_103720	0.392467	0.0428759	0.0587893	0.173255	0.678256	0.494087	0.366879	2.26132	0.56531	0.111035	0.0564692	0
B5	PanC	S	UniRef50_Q89ZR8: Pantothenate synthetase	g__Muribaculum.s__Muribaculum_intestinale	2.30854	4.47921	3.32049	3.75383	2.38733	0.404253	1.13121	0.949374	0.0256959	0	0.139985	0
B5	PanC	S	UniRef50_Q89ZR8: Pantothenate synthetase	TOTAL	4.20532	4.58665	4.69546	3.98498	4.41832	1.86434	2.69012	4.47492	2.31544	1.00681	1.07187	1.25543
B5	PanC	S	UniRef50_Q89ZR8: Pantothenate synthetase	unclassified	1.17985	0	0.637479	0	1.14551	0.740543	0.793033	0.824329	1.20859	0.605962	0.677004	1.25543
B5	CoaD	D	UniRef50_Q8A3C0: Phosphopantetheine adenylyltransferase	g__Bacteroides.s__Bacteroides_caecimuris	0	0.653266	0	0	0	0	0	0	0.313207	0.180454	0.172076	0
B5	CoaD	S	UniRef50_Q8A3C0: Phosphopantetheine adenylyltransferase	TOTAL	0.540414	0.653266	0.317709	0.389704	0.37169	0.444773	0.440001	0	0.937726	0.180454	0.172076	0.184855
B5	CoaD	D	UniRef50_Q8A3C0: Phosphopantetheine adenylyltransferase	unclassified	0.540414	0	0.317709	0.389704	0.37169	0.444773	0.440001	0	0.624519	0	0	0.184855
B5	PanC	S	UniRef50_Q8UA92: Pantothenate synthetase	g__Lachnospiraceae_unclassified.s__Lachnospiraceae_bacterium_A2	0.366022	0	6.99567	0.88823	0	0	0	0.868346	2.90385	2.44596	0	0
B5	PanC	S	UniRef50_Q8UA92: Pantothenate synthetase	TOTAL	0.366022	0	6.99567	0.88823	0	0	0	0.868346	2.90385	2.44596	0	0
B5	PanD	S	UniRef50_Q9JZ56: Aspartate 1-decarboxylase	TOTAL	2.60891	1.06819	1.72663	1.9655	2.73272	1.73566	0	3.54954	1.1125	1.20129	1.49167	0
B5	PanD	S	UniRef50_Q9JZ56: Aspartate 1-decarboxylase	unclassified	2.60891	1.06819	1.72663	1.9655	2.73272	1.73566	0	3.54954	1.1125	1.20129	1.49167	0
B5	PanD	S	UniRef50_Q9X037: Aspartate 1-decarboxylase	g__Akkermansia.s__Akkermansia_muciniphila	0	0	1.20652	0	0.259372	0	1.61343	0	0	0	0	0.526908
B5	PanD	S	UniRef50_Q9X037: Aspartate 1-decarboxylase	TOTAL	0	0	1.20652	0	0.259372	0	1.61343	0	0	0	0	0.526908
B5	CoaE	D	UniRef50_R5B0W3: Dephospho-CoA kinase	g__Muribaculum.s__Muribaculum_intestinale	2.66837	2.44697	5.00719	3.02496	1.84169	0.491637	2.33794	0.742275	0	0	0	0
B5	CoaE	S	UniRef50_R5B0W3: Dephospho-CoA kinase	TOTAL	2.66837	2.44697	5.00719	3.02496	1.84169	0.491637	2.33794	0.742275	0	0	0	0
B5	PanK	D	UniRef50_R5B0Z6: Type III pantothenate kinase	g__Muribaculaceae_unclassified.s__Muribaculaceae_bacterium_DSM_103720	0	0	0	0	1.03116	1.36332	0.57107	4.13496	1.61876	0.285175	0	0
B5	PanK	D	UniRef50_R5B0Z6: Type III pantothenate kinase	TOTAL	0	0	0	0	1.03116	1.36332	0.57107	4.13496	1.61876	0.285175	0	0
B5	PanK	D	UniRef50_R5HU76: Type III pantothenate kinase	TOTAL	0	0.231949	0	0	0	0	0	0	0.252843	0	0	0
B5	PanK	D	UniRef50_R5HU76: Type III pantothenate kinase	unclassified	0	0.231949	0	0	0	0	0	0	0.252843	0	0	0
B5	CoaD	S	UniRef50_R5LAA9: Phosphopantetheine adenylyltransferase	TOTAL	0	0	0	0	0.850568	0.69412	0	0	0	0	0	0
B5	CoaD	D	UniRef50_R5LAA9: Phosphopantetheine adenylyltransferase	unclassified	0	0	0	0	0.850568	0.69412	0	0	0	0	0	0
B5	CoaBC	S	UniRef50_R5X2N4: Phosphopantothenoylcysteine decarboxylase/phosphopantothenate--cysteine ligase	TOTAL	0.782371	1.42571	0.889397	0.697341	3.65563	2.67546	1.94221	2.31455	3.29348	3.07757	3.31422	3.24638
B5	CoaBC	D	UniRef50_R5X2N4: Phosphopantothenoylcysteine decarboxylase/phosphopantothenate--cysteine ligase	unclassified	0.782371	1.42571	0.889397	0.697341	3.65563	2.67546	1.94221	2.31455	3.29348	3.07757	3.31422	3.24638
B5	CoaBC	S	UniRef50_R5YEG6: Phosphopantothenoylcysteine decarboxylase/phosphopantothenate--cysteine ligase putative	TOTAL	11.9825	8.29737	10.9555	6.7067	13.866	8.74931	11.7693	2.47083	3.44283	5.23812	4.05648	6.71875
B5	CoaBC	D	UniRef50_R5YEG6: Phosphopantothenoylcysteine decarboxylase/phosphopantothenate--cysteine ligase putative	unclassified	11.9825	8.29737	10.9555	6.7067	13.866	8.74931	11.7693	2.47083	3.44283	5.23812	4.05648	6.71875
B5	CoaE	D	UniRef50_R6CAW5: Dephospho-CoA kinase	g__Lachnospiraceae_unclassified.s__Lachnospiraceae_bacterium_A4	0	0	0	1.12362	0	0.471628	0	0	1.1177	3.92529	3.26021	1.27096
B5	CoaE	S	UniRef50_R6CAW5: Dephospho-CoA kinase	TOTAL	0	0	0	1.12362	0	0.471628	0	0	1.1177	3.92529	3.26021	1.27096
B5	PanK	D	UniRef50_R6LN26: Type III pantothenate kinase	TOTAL	0.59398	0.643244	0	0.493936	0	0.673866	0	0	0	0.381434	0	0
B5	PanK	D	UniRef50_R6LN26: Type III pantothenate kinase	unclassified	0.59398	0.643244	0	0.493936	0	0.673866	0	0	0	0.381434	0	0
B5	CoaD	S	UniRef50_R6PF54: Phosphopantetheine adenylyltransferase	TOTAL	0	0	0	0	0	0.129749	0	0	0	0	0	0
B5	CoaD	D	UniRef50_R6PF54: Phosphopantetheine adenylyltransferase	unclassified	0	0	0	0	0	0.129749	0	0	0	0	0	0
B5	PanK	D	UniRef50_R6Q6K0: Type III pantothenate kinase	TOTAL	0	0	0	0	0	0	0.362634	0	0	0	0	0
B5	PanK	D	UniRef50_R6Q6K0: Type III pantothenate kinase	unclassified	0	0	0	0	0	0	0.362634	0	0	0	0	0
B5	CoaD	D	UniRef50_R6T0X2: Phosphopantetheine adenylyltransferase	g__Anaerotruncus.s__Anaerotruncus_sp_G3_2012	0	0	0	0	0	0	0	0	0.466869	0.443828	0	0
B5	CoaD	S	UniRef50_R6T0X2: Phosphopantetheine adenylyltransferase	TOTAL	0	0	0	0	0.621058	0.890189	1.38657	0.979065	0.466869	0.443828	0	0
B5	CoaD	D	UniRef50_R6T0X2: Phosphopantetheine adenylyltransferase	unclassified	0	0	0	0	0.621058	0.890189	1.38657	0.979065	0	0	0	0
B5	CoaD	S	UniRef50_R6X7N8: Phosphopantetheine adenylyltransferase	TOTAL	0	0	0	0	0	0	0	0	0	0	0	0.87195
B5	CoaD	D	UniRef50_R6X7N8: Phosphopantetheine adenylyltransferase	unclassified	0	0	0	0	0	0	0	0	0	0	0	0.87195
B5	CoaBC	S	UniRef50_R6XLF3: Phosphopantothenoylcysteine decarboxylase/phosphopantothenate--cysteine ligase	TOTAL	0	0	0	0	4.40866	1.98912	3.59061	4.76843	0	0	0	0
B5	CoaBC	D	UniRef50_R6XLF3: Phosphopantothenoylcysteine decarboxylase/phosphopantothenate--cysteine ligase	unclassified	0	0	0	0	4.40866	1.98912	3.59061	4.76843	0	0	0	0
B5	PanK	D	UniRef50_R6Z366: Type III pantothenate kinase	TOTAL	0	0.548921	0	0	1.24338	1.52257	0.967166	1.15527	1.08335	0.501994	0.637835	0.696131
B5	PanK	D	UniRef50_R6Z366: Type III pantothenate kinase	unclassified	0	0.548921	0	0	1.24338	1.52257	0.967166	1.15527	1.08335	0.501994	0.637835	0.696131
B5	PanK	D	UniRef50_R7B912: Type III pantothenate kinase 2	TOTAL	0.958759	0.756249	0.365813	0.420563	1.04192	0.279868	0.381502	0	0.746778	0.646003	0.293259	0.373935
B5	PanK	D	UniRef50_R7B912: Type III pantothenate kinase 2	unclassified	0.958759	0.756249	0.365813	0.420563	1.04192	0.279868	0.381502	0	0.746778	0.646003	0.293259	0.373935
B5	PanK	D	UniRef50_R7BGY2: Type III pantothenate kinase	TOTAL	0	0	0	0	0	0	0.203737	0	0	0	0	0
B5	PanK	D	UniRef50_R7BGY2: Type III pantothenate kinase	unclassified	0	0	0	0	0	0	0.203737	0	0	0	0	0
B5	PanE	S	UniRef50_R7CWQ1: 2-dehydropantoate 2-reductase	g__Bacteroides.s__Bacteroides_caecimuris	0.868617	0.728256	0.834587	0.0530247	1.29849	0.412405	0.842125	0.637019	1.15604	0.489345	0.621535	0.754305
B5	PanE	S	UniRef50_R7CWQ1: 2-dehydropantoate 2-reductase	g__Bacteroides.s__Bacteroides_dorei	0	0	0	0	0.0545395	0.0830723	0.226176	0	0	0	0	0
B5	PanE	S	UniRef50_R7CWQ1: 2-dehydropantoate 2-reductase	g__Bacteroides.s__Bacteroides_uniformis	1.30953	0.176521	0.161358	0.660459	0.215837	0.22512	0.251742	0.0334084	0.399653	0.101585	0	0.399318
B5	PanE	S	UniRef50_R7CWQ1: 2-dehydropantoate 2-reductase	TOTAL	2.17815	0.904777	0.995945	0.713484	1.56887	0.720597	1.32004	0.670428	1.55569	0.590931	0.621535	1.15362
B5	PanK	D	UniRef50_R7G4M1: Type III pantothenate kinase	TOTAL	0	0	0	0	0	0	0	0	0	0.500938	0.424311	0
B5	PanK	D	UniRef50_R7G4M1: Type III pantothenate kinase	unclassified	0	0	0	0	0	0	0	0	0	0.500938	0.424311	0
B5	PanB	S	UniRef50_R7JKL4: 3-methyl-2-oxobutanoate hydroxymethyltransferase	TOTAL	3.92815	1.96006	2.44868	1.57691	7.13725	3.53237	3.25512	5.60987	3.59261	1.85218	2.47227	1.96821
B5	PanB	S	UniRef50_R7JKL4: 3-methyl-2-oxobutanoate hydroxymethyltransferase	unclassified	3.92815	1.96006	2.44868	1.57691	7.13725	3.53237	3.25512	5.60987	3.59261	1.85218	2.47227	1.96821
B5	PanK	D	UniRef50_R8VXK1: Type III pantothenate kinase	TOTAL	0.581658	0.456982	0.512656	0	0.342872	0.674511	0	0.566112	0	0	0	0
B5	PanK	D	UniRef50_R8VXK1: Type III pantothenate kinase	unclassified	0.581658	0.456982	0.512656	0	0.342872	0.674511	0	0.566112	0	0	0	0
B5	CoaE	D	UniRef50_R9KKQ8: Dephospho-CoA kinase	g__Eubacterium.s__Eubacterium_plexicaudatum	0	0	0	0	0	0.483321	0.594534	0	0	0	0	0
B5	CoaE	D	UniRef50_R9KKQ8: Dephospho-CoA kinase	g__Lachnospiraceae_unclassified.s__Lachnospiraceae_bacterium_A2	0	0	5.52675	1.27516	0	0	0.0497435	1.45975	2.43673	1.06321	0	0
B5	CoaE	S	UniRef50_R9KKQ8: Dephospho-CoA kinase	TOTAL	6.42056	1.27731	6.995	2.65802	0.680031	1.56661	1.68315	2.65414	5.10714	5.38954	4.35686	2.57091
B5	CoaE	D	UniRef50_R9KKQ8: Dephospho-CoA kinase	unclassified	6.42056	1.27731	1.46825	1.38286	0.680031	1.08328	1.03888	1.19439	2.67041	4.32633	4.35686	2.57091
B5	PanK	D	UniRef50_R9LWA3: Type III pantothenate kinase	g__Anaerotruncus.s__Anaerotruncus_sp_G3_2012	0	0	0	0.942991	0.706252	0.709006	0	0	0.895128	0.193398	1.50604	0
B5	PanK	D	UniRef50_R9LWA3: Type III pantothenate kinase	TOTAL	0	0	0	0.942991	0.706252	0.709006	0	0	0.895128	0.193398	1.50604	0
B5	CoaE	D	UniRef50_R9M2X7: Dephospho-CoA kinase	g__Anaerotruncus.s__Anaerotruncus_sp_G3_2012	0.37419	0	0	0.563444	0.287707	0.60861	0	0	0.529249	0	0.826396	0
B5	CoaE	S	UniRef50_R9M2X7: Dephospho-CoA kinase	TOTAL	0.37419	0	0	0.563444	0.287707	0.60861	0	0	0.529249	0	0.826396	0
B5	PanE	S	UniRef50_R9MLT4: 2-dehydropantoate 2-reductase	TOTAL	7.27607	0.606001	8.7354	0.593525	0	0.596307	0.707002	2.84567	1.47449	1.17901	0.193369	0.879656
B5	PanE	S	UniRef50_R9MLT4: 2-dehydropantoate 2-reductase	unclassified	7.27607	0.606001	8.7354	0.593525	0	0.596307	0.707002	2.84567	1.47449	1.17901	0.193369	0.879656
B5	PanK	D	UniRef50_V2PXZ7: Type III pantothenate kinase	g__Mucispirillum.s__Mucispirillum_schaedleri	0	0	0	0	1.04937	0	0	0	0.885803	1.35552	2.04092	1.11343
B5	PanK	D	UniRef50_V2PXZ7: Type III pantothenate kinase	TOTAL	0	0	0	0	1.04937	0	0	0	0.885803	1.35552	2.04092	1.11343
B5	CoaBC	D	UniRef50_V2QB14: Phosphopantothenoylcysteine decarboxylase/phosphopantothenate-cysteine ligase	g__Mucispirillum.s__Mucispirillum_schaedleri	0.220034	0	0	0	1.46515	0.687976	0.831441	0.720838	2.0291	3.55246	3.72793	2.21939
B5	CoaBC	S	UniRef50_V2QB14: Phosphopantothenoylcysteine decarboxylase/phosphopantothenate-cysteine ligase	TOTAL	0.220034	0	0	0	1.46515	0.687976	0.831441	0.720838	2.0291	3.55246	3.72793	2.21939
B5	CoaE	D	UniRef50_V2QD90: Dephospho-CoA kinase	g__Mucispirillum.s__Mucispirillum_schaedleri	0	0	0	0	0.626902	0.541225	0.866723	0.929559	1.42055	2.23465	2.00124	2.54222
B5	CoaE	S	UniRef50_V2QD90: Dephospho-CoA kinase	TOTAL	0	0	0	0	0.626902	0.541225	0.866723	0.929559	1.42055	2.23465	2.00124	2.54222
B5	PanE	S	UniRef50_V2QGW5: 2-dehydropantoate 2-reductase	g__Mucispirillum.s__Mucispirillum_schaedleri	0	0	0	0.250119	2.13418	1.52826	1.26736	1.37766	5.18122	8.81741	7.75498	4.97137
B5	PanE	S	UniRef50_V2QGW5: 2-dehydropantoate 2-reductase	TOTAL	0	0	0	0.250119	2.13418	1.52826	1.26736	1.37766	5.18122	8.81741	7.75498	4.97137
B5	CoaE	S	UniRef50_V2YDE2: Dephospho-CoA kinase	TOTAL	0.472275	0	0	0	0.321759	0.581739	0	0	0.805967	0.484496	1.15539	0.630671
B5	CoaE	D	UniRef50_V2YDE2: Dephospho-CoA kinase	unclassified	0.472275	0	0	0	0.321759	0.581739	0	0	0.805967	0.484496	1.15539	0.630671
B5	PanC	S	UniRef50_W1UWL0: Pantothenate synthetase	TOTAL	0	0	0	0.191025	0	0.443218	0	0.541469	0.0842317	0.546578	0.107363	0
B5	PanC	S	UniRef50_W1UWL0: Pantothenate synthetase	unclassified	0	0	0	0.191025	0	0.443218	0	0.541469	0.0842317	0.546578	0.107363	0
B5	PanD	S	UniRef50_W1WGF5: Aspartate 1-decarboxylase (Fragment)	TOTAL	1.11566	0.328912	0	0.575876	1.28305	0	0	0.715425	0.818759	0.520492	1.16245	0
B5	PanD	S	UniRef50_W1WGF5: Aspartate 1-decarboxylase (Fragment)	unclassified	1.11566	0.328912	0	0.575876	1.28305	0	0	0.715425	0.818759	0.520492	1.16245	0
B5	PanB	S	UniRef50_W4PVT2: 3-methyl-2-oxobutanoate hydroxymethyltransferase	TOTAL	0.484818	0.443151	0	0.251721	5.29222	3.37072	2.36526	2.51925	1.29145	0.666604	0.549906	0.876273
B5	PanB	S	UniRef50_W4PVT2: 3-methyl-2-oxobutanoate hydroxymethyltransferase	unclassified	0.484818	0.443151	0	0.251721	5.29222	3.37072	2.36526	2.51925	1.29145	0.666604	0.549906	0.876273
B5	PanB	S	UniRef50_W4UQG2: 3-methyl-2-oxobutanoate hydroxymethyltransferase	TOTAL	1.62599	0.884411	0.737154	0.308416	3.53164	1.36177	1.0187	2.80933	2.2654	0.839065	0.150197	1.05958
B5	PanB	S	UniRef50_W4UQG2: 3-methyl-2-oxobutanoate hydroxymethyltransferase	unclassified	1.62599	0.884411	0.737154	0.308416	3.53164	1.36177	1.0187	2.80933	2.2654	0.839065	0.150197	1.05958
B6	pdxA	S	UniRef50_A0A015R1F7: 4-hydroxythreonine-4-phosphate dehydrogenase PdxA	TOTAL	1.52742	0.79769	1.02511	0.522912	0.949943	0.730475	0.703175	1.47687	0.783012	0.59885	0.498182	0.366127
B6	pdxA	S	UniRef50_A0A015R1F7: 4-hydroxythreonine-4-phosphate dehydrogenase PdxA	unclassified	1.52742	0.79769	1.02511	0.522912	0.949943	0.730475	0.703175	1.47687	0.783012	0.59885	0.498182	0.366127
B6	pdxF	S	UniRef50_A6GXC2: Phosphoserine aminotransferase	g__Bacteroides.s__Bacteroides_dorei	0	0	0	0	3.48257	1.02967	5.53351	0	0	0	0	0
B6	pdxF	S	UniRef50_A6GXC2: Phosphoserine aminotransferase	g__Bacteroides.s__Bacteroides_uniformis	8.79681	2.2722	4.65097	12.8272	2.25239	1.80307	1.61954	1.73614	2.60301	1.74747	0.396138	1.38075
B6	pdxF	S	UniRef50_A6GXC2: Phosphoserine aminotransferase	g__Muribaculaceae_unclassified.s__Muribaculaceae_bacterium_DSM_103720	1.05849	0.466469	1.53042	0.650729	2.10689	2.25023	2.18576	8.42407	0.718339	0.37966	0.0877654	0
B6	pdxF	S	UniRef50_A6GXC2: Phosphoserine aminotransferase	g__Muribaculum.s__Muribaculum_intestinale	12.3599	13.447	26.0423	15.3251	10.2274	3.29051	6.86139	5.63529	0.160231	0.207713	0.0220076	0.060016
B6	pdxF	S	UniRef50_A6GXC2: Phosphoserine aminotransferase	g__Parabacteroides.s__Parabacteroides_goldsteinii	0.0539842	0.534684	1.62638	1.32574	0.367748	0.244385	0.405119	0.227674	0.580596	0.311535	0	0
B6	pdxF	S	UniRef50_A6GXC2: Phosphoserine aminotransferase	g__Prevotella.s__Prevotella_sp_MGM2	1.32354	0.564692	7.7629	3.57948	0	0.19083	0	0	1.35259	0.274769	0.523628	0.596736
B6	pdxF	S	UniRef50_A6GXC2: Phosphoserine aminotransferase	TOTAL	23.5927	17.285	41.613	33.7083	18.437	8.8087	16.6053	16.0232	5.41476	2.92114	1.02954	2.0375
B6	pdxJ	S	UniRef50_B2URE7: Pyridoxine 5'-phosphate synthase	g__Akkermansia.s__Akkermansia_muciniphila	0	0.199315	0.819872	0.402651	0.650501	0.104402	1.10146	0	0	0	0	0.178982
B6	pdxJ	S	UniRef50_B2URE7: Pyridoxine 5'-phosphate synthase	g__Mucispirillum.s__Mucispirillum_schaedleri	1.00634	0.0779012	0.106814	0.487952	3.10595	2.82807	3.03643	3.18301	9.8955	15.8346	16.9584	13.9906
B6	pdxJ	S	UniRef50_B2URE7: Pyridoxine 5'-phosphate synthase	TOTAL	1.00634	0.277216	0.926687	0.890603	3.75645	2.93247	4.96571	3.18301	9.8955	15.8346	16.9584	14.1696
B6	pdxJ	S	UniRef50_B2URE7: Pyridoxine 5'-phosphate synthase	unclassified	0	0	0	0	0	0	0.82782	0	0	0	0	0
B6	Pdx2	S	UniRef50_B6WYH4: Putative pyridoxal 5'-phosphate synthase, glutaminase subunit Pdx2 (Fragment)	TOTAL	0	0	1.29919	0	3.37578	2.21799	0	0	2.67277	2.6544	3.00402	1.80139
B6	Pdx2	S	UniRef50_B6WYH4: Putative pyridoxal 5'-phosphate synthase, glutaminase subunit Pdx2 (Fragment)	unclassified	0	0	1.29919	0	3.37578	2.21799	0	0	2.67277	2.6544	3.00402	1.80139
B6	pdxF	S	UniRef50_B7J6V1: Phosphoserine aminotransferase	g__Acutalibacter.s__Acutalibacter_muris	0.848369	0.361073	0.539425	0.309495	0.225653	0.447037	0	0.447242	0.628962	0.663048	0	0.373459
B6	pdxF	S	UniRef50_B7J6V1: Phosphoserine aminotransferase	g__Anaerotruncus.s__Anaerotruncus_sp_G3_2012	0.141395	0.607147	0.0900157	0.464242	0.609497	1.08243	0.0468125	0.503209	0.845887	0.816043	0.949968	0.0393115
B6	pdxF	S	UniRef50_B7J6V1: Phosphoserine aminotransferase	g__Dorea.s__Dorea_sp_5_2	1.02773	0.839508	0.609392	0.576486	0.407563	1.75896	0.633849	0.448628	1.73463	0.989006	1.40798	2.75698
B6	pdxF	S	UniRef50_B7J6V1: Phosphoserine aminotransferase	g__Eubacterium.s__Eubacterium_plexicaudatum	0	0	0	0	0.679286	0.431106	1.38418	0	0	0	0	0
B6	pdxF	S	UniRef50_B7J6V1: Phosphoserine aminotransferase	g__Lachnospiraceae_unclassified.s__Lachnospiraceae_bacterium_28_4	0	0	0	0	0	0	0	0	19.4096	0.71616	23.1719	22.1717
B6	pdxF	S	UniRef50_B7J6V1: Phosphoserine aminotransferase	g__Lachnospiraceae_unclassified.s__Lachnospiraceae_bacterium_A2	0.23045	0.756437	5.34921	1.46334	0	0	0	1.4009	7.61454	7.94577	0	0
B6	pdxF	S	UniRef50_B7J6V1: Phosphoserine aminotransferase	g__Lachnospiraceae_unclassified.s__Lachnospiraceae_bacterium_A4	0	3.37192	0	5.05429	3.55427	6.01701	1.66635	4.06514	8.02715	27.1046	15.7809	9.22179
B6	pdxF	S	UniRef50_B7J6V1: Phosphoserine aminotransferase	g__Oscillibacter.s__Oscillibacter_sp_1_3	0	2.24061	0	0	0	4.25078	0	0	2.50984	2.47424	1.20686	0
B6	pdxF	S	UniRef50_B7J6V1: Phosphoserine aminotransferase	TOTAL	2.24794	8.17669	6.58804	7.86786	5.47627	13.9873	3.73119	6.86511	40.7706	40.7089	42.5177	34.5632
B6	pdxA	S	UniRef50_D3P9D9: 4-hydroxythreonine-4-phosphate dehydrogenase	g__Mucispirillum.s__Mucispirillum_schaedleri	0	0	0	0	0.515814	0	0	0	0	0.504966	0.22224	0
B6	pdxA	S	UniRef50_D3P9D9: 4-hydroxythreonine-4-phosphate dehydrogenase	TOTAL	0	0	0	0	0.515814	0	0	0	0	0.504966	0.22224	0
B6	SerA	S	UniRef50_D4H7N3: D-3-phosphoglycerate dehydrogenase	g__Mucispirillum.s__Mucispirillum_schaedleri	0.458961	0	0	0	3.41507	2.37753	1.58052	1.27041	3.98502	8.89543	6.02053	3.86687
B6	SerA	S	UniRef50_D4H7N3: D-3-phosphoglycerate dehydrogenase	TOTAL	0.458961	0	0	0	3.41507	2.37753	1.58052	1.27041	3.98502	8.89543	6.02053	3.86687
B6	pdxK	D	UniRef50_D4JS64: Pyridoxal/pyridoxine/pyridoxamine kinase	g__Anaerotruncus.s__Anaerotruncus_sp_G3_2012	0	0.168216	0	0	0	0.352504	0	0	0.327664	0	0	0
B6	pdxK	D	UniRef50_D4JS64: Pyridoxal/pyridoxine/pyridoxamine kinase	TOTAL	0	0.168216	0	0	0	0.974853	0	0	0.327664	0	0	0
B6	pdxK	D	UniRef50_D4JS64: Pyridoxal/pyridoxine/pyridoxamine kinase	unclassified	0	0	0	0	0	0.622348	0	0	0	0	0	0
B6	pdxA	S	UniRef50_D4LRH6: 4-hydroxythreonine-4-phosphate dehydrogenase	g__Clostridium.s__Clostridium_sp_ASF356	0.0185553	0	0	0	0.0711052	0	0	0	0	2.01688	6.03404	0
B6	pdxA	S	UniRef50_D4LRH6: 4-hydroxythreonine-4-phosphate dehydrogenase	g__Clostridium.s__Clostridium_sp_ASF502	1.64624	0	0	0.0231366	0	0	0	0.087775	0.267652	1.51203	0.791797	3.37358
B6	pdxA	S	UniRef50_D4LRH6: 4-hydroxythreonine-4-phosphate dehydrogenase	g__Dorea.s__Dorea_sp_5_2	1.34859	0	0	0.210848	0.478482	0.127046	0	0.740566	0.561861	0.216204	0.755942	0.583244
B6	pdxA	S	UniRef50_D4LRH6: 4-hydroxythreonine-4-phosphate dehydrogenase	g__Oscillibacter.s__Oscillibacter_sp_1_3	0	0	0	0	0	0.242115	0	0	3.95703	2.63377	2.26097	0
B6	pdxA	S	UniRef50_D4LRH6: 4-hydroxythreonine-4-phosphate dehydrogenase	TOTAL	3.01338	0	0	0.233985	1.4504	0.369161	0.716644	0.828341	12.4283	9.95086	24.5631	9.32446
B6	pdxA	S	UniRef50_D4LRH6: 4-hydroxythreonine-4-phosphate dehydrogenase	unclassified	0	0	0	0	0.900812	0	0.716644	0	7.64176	3.57198	14.7203	5.36763
B6	pdxH	S	UniRef50_D4MSZ0: Pyridoxamine 5'-phosphate oxidase	g__Lachnospiraceae_unclassified.s__Lachnospiraceae_bacterium_3_2	0	0	0	0	0	0.169176	0	0.476407	1.40322	3.55121	0.957092	1.06371
B6	pdxH	S	UniRef50_D4MSZ0: Pyridoxamine 5'-phosphate oxidase	TOTAL	5.1473	10.9846	12.6082	17.5655	2.33943	6.03326	7.44118	3.10097	2.64144	4.72661	2.51823	2.72014
B6	pdxH	S	UniRef50_D4MSZ0: Pyridoxamine 5'-phosphate oxidase	unclassified	5.1473	10.9846	12.6082	17.5655	2.33943	5.86408	7.44118	2.62456	1.23822	1.17541	1.56114	1.65644
B6	pdxK	D	UniRef50_E5Y829: Pyridoxine kinase	TOTAL	0	0.313218	0	0.545891	0.481434	0	0.497684	0	0.331232	0.38158	0	0
B6	pdxK	D	UniRef50_E5Y829: Pyridoxine kinase	unclassified	0	0.313218	0	0.545891	0.481434	0	0.497684	0	0.331232	0.38158	0	0
B6	pdxA	S	UniRef50_G5MDL8: 4-hydroxythreonine-4-phosphate dehydrogenase	TOTAL	1.10532	0	0	0	0.713274	0.173829	0	0	0	0.177198	0.225295	0.308365
B6	pdxA	S	UniRef50_G5MDL8: 4-hydroxythreonine-4-phosphate dehydrogenase	unclassified	1.10532	0	0	0	0.713274	0.173829	0	0	0	0.177198	0.225295	0.308365
B6	SerA	S	UniRef50_J9C719: D-3-phosphoglycerate dehydrogenase	TOTAL	116.666	16.6088	30.4503	41.6228	26.6909	24.288	20.961	78.4461	9.67719	5.52461	2.60803	3.67715
B6	SerA	S	UniRef50_J9C719: D-3-phosphoglycerate dehydrogenase	unclassified	116.666	16.6088	30.4503	41.6228	26.6909	24.288	20.961	78.4461	9.67719	5.52461	2.60803	3.67715
B6	PdxA	S	UniRef50_J9CSS1: 4-hydroxythreonine-4-phosphate dehydrogenase (Fragment)	TOTAL	0	0	0	0	0.868904	0.38326	0.237302	0.510106	0	0	0	0
B6	PdxA	S	UniRef50_J9CSS1: 4-hydroxythreonine-4-phosphate dehydrogenase (Fragment)	unclassified	0	0	0	0	0.868904	0.38326	0.237302	0.510106	0	0	0	0
B6	SerA	S	UniRef50_J9D3A5: D-3-phosphoglycerate dehydrogenase (Fragment)	TOTAL	11.992	7.69673	9.32391	9.2895	25.1458	16.3509	15.8341	37.4905	10.9908	7.3598	6.07746	6.46988
B6	SerA	S	UniRef50_J9D3A5: D-3-phosphoglycerate dehydrogenase (Fragment)	unclassified	11.992	7.69673	9.32391	9.2895	25.1458	16.3509	15.8341	37.4905	10.9908	7.3598	6.07746	6.46988
B6	SerA	S	UniRef50_J9FL59: D-3-phosphoglycerate dehydrogenase	TOTAL	5.87035	4.87815	7.03572	5.73693	20.5508	11.0356	15.5971	30.5486	5.32659	3.36862	2.02588	1.2577
B6	SerA	S	UniRef50_J9FL59: D-3-phosphoglycerate dehydrogenase	unclassified	5.87035	4.87815	7.03572	5.73693	20.5508	11.0356	15.5971	30.5486	5.32659	3.36862	2.02588	1.2577
B6	pdxJ	S	UniRef50_J9FVF6: Pyridoxal phosphate biosynthetic protein PdxJ	TOTAL	3.53253	1.32474	2.41077	2.782	6.0953	3.40223	3.60462	6.72712	3.79965	3.26564	1.71652	0.994109
B6	pdxJ	S	UniRef50_J9FVF6: Pyridoxal phosphate biosynthetic protein PdxJ	unclassified	3.53253	1.32474	2.41077	2.782	6.0953	3.40223	3.60462	6.72712	3.79965	3.26564	1.71652	0.994109
B6	pdxK	D	UniRef50_K0N8R5: Pyridoxal/pyridoxine/pyridoxamine kinase	g__Lactobacillus.s__Lactobacillus_murinus	0	0	0	1.13212	0	0	0	0	6.36272	1.74018	12.1181	16.767
B6	pdxK	D	UniRef50_K0N8R5: Pyridoxal/pyridoxine/pyridoxamine kinase	TOTAL	0	0	0	1.13212	0	0	0	0	6.36272	1.74018	12.1181	16.767
B6	PdxB	S	UniRef50_K1S8U9: Glyceraldehyde-3-phosphate dehydrogenase/erythrose-4-phosphate dehydrogenase (Fragment)	TOTAL	0.346635	0	0	0	0.594873	0	0.486174	0	0	0	0	0
B6	PdxB	S	UniRef50_K1S8U9: Glyceraldehyde-3-phosphate dehydrogenase/erythrose-4-phosphate dehydrogenase (Fragment)	unclassified	0.346635	0	0	0	0.594873	0	0.486174	0	0	0	0	0
B6	pdxF	S	UniRef50_K1STM2: Phosphoserine aminotransferase (Fragment)	TOTAL	20.2955	20.282	17.8309	15.7073	12.1173	14.8543	12.6833	13.7549	23.7929	27.2849	27.7565	24.7797
B6	pdxF	S	UniRef50_K1STM2: Phosphoserine aminotransferase (Fragment)	unclassified	20.2955	20.282	17.8309	15.7073	12.1173	14.8543	12.6833	13.7549	23.7929	27.2849	27.7565	24.7797
B6	SerA	S	UniRef50_K1T4F6: D-3-phosphoglycerate dehydrogenase (Fragment)	TOTAL	12.6069	13.5672	18.171	14.6968	38.7534	29.9856	34.0143	56.7254	72.1232	29.2684	20.2513	32.6325
B6	SerA	S	UniRef50_K1T4F6: D-3-phosphoglycerate dehydrogenase (Fragment)	unclassified	12.6069	13.5672	18.171	14.6968	38.7534	29.9856	34.0143	56.7254	72.1232	29.2684	20.2513	32.6325
B6	pdxT	S	UniRef50_K1TEG4: Glutamine amidotransferase subunit PdxT (Fragment)	TOTAL	0	0	0	0	0	0.167143	0	0	0	0	0	0
B6	pdxT	S	UniRef50_K1TEG4: Glutamine amidotransferase subunit PdxT (Fragment)	unclassified	0	0	0	0	0	0.167143	0	0	0	0	0	0
B6	pdxF	S	UniRef50_K8E2M3: Phosphoserine aminotransferase domain protein	TOTAL	0	0	0	0	0	0	1.11872	0	1.31021	1.27829	0	0
B6	pdxF	S	UniRef50_K8E2M3: Phosphoserine aminotransferase domain protein	unclassified	0	0	0	0	0	0	1.11872	0	1.31021	1.27829	0	0
B6	SNZ	S	UniRef50_N1P6M8: Snz2p	TOTAL	0	0.577257	0	0	0	0	0	0	0	0	0	1.11842
B6	SNZ	S	UniRef50_N1P6M8: Snz2p	unclassified	0	0.577257	0	0	0	0	0	0	0	0	0	1.11842
B6	pdxT	S	UniRef50_Q24PK8: Glutamine amidotransferase subunit PdxT	g__Dorea.s__Dorea_sp_5_2	0	2.66554	0	0.269186	0	0	0	0.567541	0	0	0	0.359132
B6	pdxT	S	UniRef50_Q24PK8: Glutamine amidotransferase subunit PdxT	TOTAL	2.506	3.38863	0.79308	1.47658	1.82924	1.09059	0.74214	1.15825	1.07419	1.22773	1.56104	1.08658
B6	pdxT	S	UniRef50_Q24PK8: Glutamine amidotransferase subunit PdxT	unclassified	2.506	0.723093	0.79308	1.20739	1.82924	1.09059	0.74214	0.590705	1.07419	1.22773	1.56104	0.727447
B6	pdxF	S	UniRef50_Q3EK52: Phosphoserine aminotransferase	TOTAL	0	0	0	0	0	0	0	0	0	0.126008	0	0
B6	pdxF	S	UniRef50_Q3EK52: Phosphoserine aminotransferase	unclassified	0	0	0	0	0	0	0	0	0	0.126008	0	0
B6	pdxH	S	UniRef50_Q5LFJ5: Pyridoxine/pyridoxamine 5'-phosphate oxidase	g__Bacteroides.s__Bacteroides_dorei	0	0	0	0	0	0	0.468588	0	0	0	0	0
B6	pdxH	S	UniRef50_Q5LFJ5: Pyridoxine/pyridoxamine 5'-phosphate oxidase	TOTAL	0	0	0	0	0	0	0.468588	0	0	0	0	0
B6	pdxA	S	UniRef50_Q89ZK3: 4-hydroxythreonine-4-phosphate dehydrogenase	g__Bacteroides.s__Bacteroides_caecimuris	0.525552	0.17896	0.311678	0.197205	0.401637	0.323799	0.463972	0.304803	0.331288	0.168512	0.149976	0.0389646
B6	pdxA	S	UniRef50_Q89ZK3: 4-hydroxythreonine-4-phosphate dehydrogenase	g__Bacteroides.s__Bacteroides_uniformis	8.90583	1.75173	2.71252	7.64459	2.58642	1.83423	2.42621	2.92776	1.78862	1.26012	0.683571	1.96108
B6	pdxA	S	UniRef50_Q89ZK3: 4-hydroxythreonine-4-phosphate dehydrogenase	g__Parabacteroides.s__Parabacteroides_goldsteinii	0.137304	0.302834	1.24574	0.536721	0.438495	0.267172	0.636466	0.216641	0.305685	0.0990519	0	0
B6	pdxA	S	UniRef50_Q89ZK3: 4-hydroxythreonine-4-phosphate dehydrogenase	TOTAL	10.6148	2.70531	5.34967	9.03563	5.2467	3.22919	5.10013	5.56257	3.93204	2.02543	1.25442	2.81209
B6	pdxA	S	UniRef50_Q89ZK3: 4-hydroxythreonine-4-phosphate dehydrogenase	unclassified	1.04609	0.471783	1.07974	0.657121	1.82014	0.803987	1.57348	2.11336	1.50645	0.497743	0.420877	0.812048
B6	pdxJ	S	UniRef50_Q8A0V3: Pyridoxine 5'-phosphate synthase	g__Bacteroides.s__Bacteroides_caecimuris	0	0	0	0	0	0.243685	0	0	0	0	0	0
B6	pdxJ	S	UniRef50_Q8A0V3: Pyridoxine 5'-phosphate synthase	TOTAL	11.6491	3.1965	4.39017	3.65868	12.4809	8.36826	7.71929	18.0887	4.62019	2.41334	2.17722	1.77755
B6	pdxJ	S	UniRef50_Q8A0V3: Pyridoxine 5'-phosphate synthase	unclassified	11.6491	3.1965	4.39017	3.65868	12.4809	8.12457	7.71929	18.0887	4.62019	2.41334	2.17722	1.77755
B6	pdxA	S	UniRef50_Q8RGR0: 4-hydroxythreonine-4-phosphate dehydrogenase	TOTAL	0	0	0	0	0.731629	0	0	0	0	0.460392	0	0
B6	pdxA	S	UniRef50_Q8RGR0: 4-hydroxythreonine-4-phosphate dehydrogenase	unclassified	0	0	0	0	0.731629	0	0	0	0	0.460392	0	0
B6	pdxJ	S	UniRef50_Q9PH84: Pyridoxine 5'-phosphate synthase	g__Bacteroides.s__Bacteroides_dorei	0	0	0	0	0.462184	0.162457	0.700328	0	0	0	0	0
B6	pdxJ	S	UniRef50_Q9PH84: Pyridoxine 5'-phosphate synthase	g__Muribaculum.s__Muribaculum_intestinale	1.92945	2.43539	2.02808	2.93538	1.85742	0.380803	0.777623	0.796156	0.0933739	0	0	0
B6	pdxJ	S	UniRef50_Q9PH84: Pyridoxine 5'-phosphate synthase	g__Parabacteroides.s__Parabacteroides_goldsteinii	0	0.437334	0.77591	0.31186	0.283098	0.296452	0.403567	0.219029	0.493361	0	0	0
B6	pdxJ	S	UniRef50_Q9PH84: Pyridoxine 5'-phosphate synthase	g__Prevotella.s__Prevotella_sp_MGM2	0.111332	0.0516914	0.318946	0.139252	0	0.243685	0	0	0	0	0	0
B6	pdxJ	S	UniRef50_Q9PH84: Pyridoxine 5'-phosphate synthase	TOTAL	2.04078	2.92442	3.12294	3.38649	2.6027	1.0834	1.88152	1.01519	0.586735	0	0	0
B6	pdxA	S	UniRef50_R5AN97: 4-hydroxythreonine-4-phosphate dehydrogenase	TOTAL	0.756702	0	0	0	0	1.42601	0.71188	2.48688	0	0	0	0
B6	pdxA	S	UniRef50_R5AN97: 4-hydroxythreonine-4-phosphate dehydrogenase	unclassified	0.756702	0	0	0	0	1.42601	0.71188	2.48688	0	0	0	0
B6	pdxF	S	UniRef50_R5K0U5: Phosphoserine aminotransferase	TOTAL	98.1441	121.067	74.9663	74.0582	53.6339	60.2393	59.21	65.4557	88.6844	122.599	120.46	104.665
B6	pdxF	S	UniRef50_R5K0U5: Phosphoserine aminotransferase	unclassified	98.1441	121.067	74.9663	74.0582	53.6339	60.2393	59.21	65.4557	88.6844	122.599	120.46	104.665
B6	pdxH	S	UniRef50_R5VX33: Pyridoxamine 5'-phosphate oxidase family protein	TOTAL	0.925043	0	0	0	0	0	0.757582	0.705796	0	0.484809	0.861274	0.793124
B6	pdxH	S	UniRef50_R5VX33: Pyridoxamine 5'-phosphate oxidase family protein	unclassified	0.925043	0	0	0	0	0	0.757582	0.705796	0	0.484809	0.861274	0.793124
B6	pdxA	S	UniRef50_R6FEQ9: 4-hydroxythreonine-4-phosphate dehydrogenase	TOTAL	1.63776	2.32524	0.882084	2.77731	3.43958	0	0.604715	0.946532	2.17321	3.10519	2.15702	1.62866
B6	pdxA	S	UniRef50_R6FEQ9: 4-hydroxythreonine-4-phosphate dehydrogenase	unclassified	1.63776	2.32524	0.882084	2.77731	3.43958	0	0.604715	0.946532	2.17321	3.10519	2.15702	1.62866
B6	pdxS	S	UniRef50_R6FTQ4: Pyridoxal biosynthesis lyase PdxS	TOTAL	10.1562	8.01604	5.63999	7.12842	9.79465	7.43053	9.90746	6.15049	10.6358	13.2981	11.9525	10.9719
B6	pdxS	S	UniRef50_R6FTQ4: Pyridoxal biosynthesis lyase PdxS	unclassified	10.1562	8.01604	5.63999	7.12842	9.79465	7.43053	9.90746	6.15049	10.6358	13.2981	11.9525	10.9719
B6	pdxA	S	UniRef50_R6ZD40: 4-hydroxythreonine-4-phosphate dehydrogenase	TOTAL	3.0194	0.918592	1.41668	0	0	0.648659	0.558659	0.636908	0	0	5.93459	5.24998
B6	pdxA	S	UniRef50_R6ZD40: 4-hydroxythreonine-4-phosphate dehydrogenase	unclassified	3.0194	0.918592	1.41668	0	0	0.648659	0.558659	0.636908	0	0	5.93459	5.24998
B6	pdxT	S	UniRef50_R7BX47: Glutamine amidotransferase subunit PdxT	TOTAL	0	0	0	0	0	1.9533	1.19917	0	0	0	0	0
B6	pdxT	S	UniRef50_R7BX47: Glutamine amidotransferase subunit PdxT	unclassified	0	0	0	0	0	1.9533	1.19917	0	0	0	0	0
B6	pdxK	D	UniRef50_R7HWP2: Pyridoxal/pyridoxine/pyridoxamine kinase	g__Enterorhabdus.s__Enterorhabdus_caecimuris	0	0.0440424	0	0	0	0	0	0	0	0	0	0
B6	pdxK	D	UniRef50_R7HWP2: Pyridoxal/pyridoxine/pyridoxamine kinase	g__Lachnospiraceae_unclassified.s__Lachnospiraceae_bacterium_10_1	0.449114	1.9314	1.35425	0.532141	0	0	0	0	0	0	0	0
B6	pdxK	D	UniRef50_R7HWP2: Pyridoxal/pyridoxine/pyridoxamine kinase	TOTAL	0.449114	1.97544	1.35425	0.532141	0	0.572517	0	0	0	0.596929	0	0.350902
B6	pdxK	D	UniRef50_R7HWP2: Pyridoxal/pyridoxine/pyridoxamine kinase	unclassified	0	0	0	0	0	0.572517	0	0	0	0.596929	0	0.350902
B6	pdxF	S	UniRef50_R7I889: Phosphoserine aminotransferase	g__Turicimonas.s__Turicimonas_muris	0	0.217887	0	0	0.645068	0	0.501957	0.428236	0	0	0	0
B6	pdxF	S	UniRef50_R7I889: Phosphoserine aminotransferase	TOTAL	0	0.217887	0	0	0.645068	0	0.501957	0.428236	0	0	0	0
B6	pdxH	S	UniRef50_R7ISV6: Pyridoxamine 5'-phosphate oxidase family protein	TOTAL	0	0	0	0	0	0	0.908089	0	0	0	0	0
B6	pdxH	S	UniRef50_R7ISV6: Pyridoxamine 5'-phosphate oxidase family protein	unclassified	0	0	0	0	0	0	0.908089	0	0	0	0	0
B6	PdxT	S	UniRef50_T0T7Q2: Pyridoxine biosynthesis glutamine amidotransferase, glutaminase subunit	TOTAL	1.06093	0	0	0	0	0	0	0	0	0	0	0
B6	PdxT	S	UniRef50_T0T7Q2: Pyridoxine biosynthesis glutamine amidotransferase, glutaminase subunit	unclassified	1.06093	0	0	0	0	0	0	0	0	0	0	0
B6	SerA	S	UniRef50_W4PCI7: D-3-phosphoglycerate dehydrogenase	TOTAL	0.521264	0.676987	0.661398	0	0.795446	0	0.551123	0.657292	0.231263	0	0.638251	0
B6	SerA	S	UniRef50_W4PCI7: D-3-phosphoglycerate dehydrogenase	unclassified	0.521264	0.676987	0.661398	0	0.795446	0	0.551123	0.657292	0.231263	0	0.638251	0
B6	dsx	S	UniRef50_W4PT02: 1-deoxy-D-xylulose 5-phosphate synthase	TOTAL	0	1.00066	0	1.56634	0	1.40388	1.28178	2.42846	0.680789	0	0.355604	0.581148
B6	dsx	S	UniRef50_W4PT02: 1-deoxy-D-xylulose 5-phosphate synthase	unclassified	0	1.00066	0	1.56634	0	1.40388	1.28178	2.42846	0.680789	0	0.355604	0.581148
B6	pdxJ	S	UniRef50_W4ULY2: Pyridoxine 5'-phosphate synthase	TOTAL	3.39201	0.999075	1.02929	0	4.15765	1.86721	1.97205	2.29039	2.27584	1.24623	0	1.54465
B6	pdxJ	S	UniRef50_W4ULY2: Pyridoxine 5'-phosphate synthase	unclassified	3.39201	0.999075	1.02929	0	4.15765	1.86721	1.97205	2.29039	2.27584	1.24623	0	1.54465
B6	SerA	S	UniRef50_W4V4U6: D-3-phosphoglycerate dehydrogenase	TOTAL	0	1.12904	2.84173	0	0	1.70355	0	0	0	5.36199	0	2.91361
B6	SerA	S	UniRef50_W4V4U6: D-3-phosphoglycerate dehydrogenase	unclassified	0	1.12904	2.84173	0	0	1.70355	0	0	0	5.36199	0	2.91361
B7	BioA	S	UniRef50_A3JWR1: Probable adenosylmethionine-8-amino-7-oxononanoate aminotransferase (Fragment)	TOTAL	0	1.33769	4.0824	0	5.01032	2.25953	4.13614	1.77613	12.1175	16.7071	7.7363	15.2256
B7	BioA	S	UniRef50_A3JWR1: Probable adenosylmethionine-8-amino-7-oxononanoate aminotransferase (Fragment)	unclassified	0	1.33769	4.0824	0	5.01032	2.25953	4.13614	1.77613	12.1175	16.7071	7.7363	15.2256
B7	BioB	S	UniRef50_A6TT61: Biotin synthase	g__Lachnospiraceae_unclassified.s__Lachnospiraceae_bacterium_10_1	2.47144	31.5182	0	12.7698	0	0	0	0	0	0	0	0
B7	BioB	S	UniRef50_A6TT61: Biotin synthase	TOTAL	2.47144	31.5182	0	12.7698	0	0	0	0	0	0	0	0
B7	BioA	S	UniRef50_A9M387: Adenosylmethionine-8-amino-7-oxononanoate aminotransferase	g__Muribaculum.s__Muribaculum_intestinale	0.654524	0.777827	2.30015	1.0315	0.618694	0	0.398729	0.621177	0	0	0	0
B7	BioA	S	UniRef50_A9M387: Adenosylmethionine-8-amino-7-oxononanoate aminotransferase	TOTAL	0.654524	0.777827	2.30015	1.0315	0.618694	0	0.398729	0.621177	0	0	0	0
B7	BioB	S	UniRef50_B2RH08: Biotin synthase	g__Parabacteroides.s__Parabacteroides_goldsteinii	0	0.128202	0.678024	0	0	0	0	0	0	0	0	0
B7	BioB	S	UniRef50_B2RH08: Biotin synthase	TOTAL	0	0.128202	0.678024	0	0	0	0	0	0	0	0	0
B7	BioD	S	UniRef50_B2UNC5: ATP-dependent dethiobiotin synthetase BioD	g__Akkermansia.s__Akkermansia_muciniphila	0	0	0.642017	0	0.885617	0	1.54419	0	0	0	0	0
B7	BioD	S	UniRef50_B2UNC5: ATP-dependent dethiobiotin synthetase BioD	TOTAL	0	0	0.642017	0	0.885617	0	1.54419	0	0	0	0	0
B7	BioB	S	UniRef50_B8DPP9: Biotin synthase	g__Desulfovibrionaceae_unclassified.s__Desulfovibrionaceae_bacterium	0	0	0	0	0	0	0	0	0	0.463545	0	0.621669
B7	BioB	S	UniRef50_B8DPP9: Biotin synthase	TOTAL	0	0	0	0	0	0	0	0	0	0.463545	0	0.621669
B7	BioA	S	UniRef50_B8J0C5: Adenosylmethionine-8-amino-7-oxononanoate aminotransferase	g__Desulfovibrionaceae_unclassified.s__Desulfovibrionaceae_bacterium	0	0	0	0	0	0	0	0	0	0.468954	0	0.309889
B7	BioA	S	UniRef50_B8J0C5: Adenosylmethionine-8-amino-7-oxononanoate aminotransferase	TOTAL	0	0	0	0	0	0	0	0	0	0.468954	0	0.309889
B7	BioD	S	UniRef50_C0QVL9: ATP-dependent dethiobiotin synthetase BioD	g__Lachnospiraceae_unclassified.s__Lachnospiraceae_bacterium_3_2	0	0	0.0383021	0	0	0	0	0	0	0	5.76924	4.71526
B7	BioD	S	UniRef50_C0QVL9: ATP-dependent dethiobiotin synthetase BioD	g__Lachnospiraceae_unclassified.s__Lachnospiraceae_bacterium_A2	0.844921	1.00312	2.04314	5.98849	0	0	0	0.831281	1.19992	0.39235	0	0
B7	BioD	S	UniRef50_C0QVL9: ATP-dependent dethiobiotin synthetase BioD	TOTAL	3.47108	1.00312	2.08144	5.98849	0	0	0	0.831281	1.19992	0.39235	5.76924	4.71526
B7	BioD	S	UniRef50_C0QVL9: ATP-dependent dethiobiotin synthetase BioD	unclassified	2.62616	0	0	0	0	0	0	0	0	0	0	0
B7	BioB	S	UniRef50_C0QVM0: Biotin synthase	g__Akkermansia.s__Akkermansia_muciniphila	0	0.0372457	0.459625	0	0.204936	0	0.503624	0	0	0	0	0.267636
B7	BioB	S	UniRef50_C0QVM0: Biotin synthase	g__Dorea.s__Dorea_sp_5_2	0.0684627	0.476673	0	0.128448	0	0.133202	0.0906656	0	0.0758788	0	0	0.304317
B7	BioB	S	UniRef50_C0QVM0: Biotin synthase	g__Lachnospiraceae_unclassified.s__Lachnospiraceae_bacterium_A4	0	0.0735015	0	4.25518	0	0.0770005	0.130999	0.250397	0.13215	0.68512	0.28966	0.0440132
B7	BioB	S	UniRef50_C0QVM0: Biotin synthase	g__Mucispirillum.s__Mucispirillum_schaedleri	2.11277	0.447808	0.204968	0.830543	0.205629	1.1346	0.373076	0.349403	5.50917	31.1133	18.7704	17.1161
B7	BioB	S	UniRef50_C0QVM0: Biotin synthase	TOTAL	2.18123	1.03523	0.664594	6.39162	0.410565	1.3448	1.09837	0.5998	6.97794	31.7984	20.7108	17.7321
B7	BioB	S	UniRef50_C0QVM0: Biotin synthase	unclassified	0	0	0	1.17745	0	0	0	0	1.26074	0	1.65072	0
B7	BioB	S	UniRef50_C7GAW3: Putative biotin synthase	TOTAL	2.87653	0.986071	1.26894	0.497147	0	0	0	0	0	0	0	0.125972
B7	BioB	S	UniRef50_C7GAW3: Putative biotin synthase	unclassified	2.87653	0.986071	1.26894	0.497147	0	0	0	0	0	0	0	0.125972
B7	AccB	D	UniRef50_C7MMV3: Acetyl-CoA carboxylase, biotin carboxyl carrier protein	g__Adlercreutzia.s__Adlercreutzia_equolifaciens	0	0	0	0.273615	0	0.0677075	0	0	0.0442707	0	0	0
B7	AccB	D	UniRef50_C7MMV3: Acetyl-CoA carboxylase, biotin carboxyl carrier protein	g__Enterorhabdus.s__Enterorhabdus_caecimuris	0	0	0	0.569261	0	0.211751	0	0.578931	0.407272	0	0	0
B7	AccB	D	UniRef50_C7MMV3: Acetyl-CoA carboxylase, biotin carboxyl carrier protein	TOTAL	0	0	0	1.30683	0	0.279459	0.239342	0.578931	0.451542	0	0	0
B7	AccB	D	UniRef50_C7MMV3: Acetyl-CoA carboxylase, biotin carboxyl carrier protein	unclassified	0	0	0	0.463952	0	0	0.239342	0	0	0	0	0
B7	UbiE	S	UniRef50_D4IXG5: Methylase involved in ubiquinone/menaquinone biosynthesis	TOTAL	0	1.48535	0	0	0	0	0	0	0	0	0	0
B7	UbiE	S	UniRef50_D4IXG5: Methylase involved in ubiquinone/menaquinone biosynthesis	unclassified	0	1.48535	0	0	0	0	0	0	0	0	0	0
B7	UbiE	S	UniRef50_D4J4D5: Methylase involved in ubiquinone/menaquinone biosynthesis	TOTAL	0	0	0	0	0	0.260144	0	0.713885	0.718107	0	0	0.575939
B7	UbiE	S	UniRef50_D4J4D5: Methylase involved in ubiquinone/menaquinone biosynthesis	unclassified	0	0	0	0	0	0.260144	0	0.713885	0.718107	0	0	0.575939
B7	BioD	S	UniRef50_D6DFW0: ATP-dependent dethiobiotin synthetase BioD	TOTAL	10.313	10.1445	2.80744	2.957	0	0	0	0	0.365044	2.82741	0	0.598522
B7	BioD	S	UniRef50_D6DFW0: ATP-dependent dethiobiotin synthetase BioD	unclassified	10.313	10.1445	2.80744	2.957	0	0	0	0	0.365044	2.82741	0	0.598522
B7	BirA	D	UniRef50_G4KVZ8: Transcriptional regulator/biotin--[acetyl-CoA-carboxylase] ligase	g__Firmicutes_unclassified.s__Firmicutes_bacterium_ASF500	0	0.234976	0	0.779056	0.34809	0.397627	0	0	1.36491	0.804793	0.166666	0
B7	BirA	D	UniRef50_G4KVZ8: Transcriptional regulator/biotin--[acetyl-CoA-carboxylase] ligase	g__Oscillibacter.s__Oscillibacter_sp_1_3	0	0.0535257	0	0	0	0.0934563	0	0	0.491485	0.351118	0.281391	0
B7	BirA	D	UniRef50_G4KVZ8: Transcriptional regulator/biotin--[acetyl-CoA-carboxylase] ligase	TOTAL	0	0.288502	0	0.779056	0.34809	0.491083	0	0	2.67949	1.15591	0.448056	0
B7	BirA	D	UniRef50_G4KVZ8: Transcriptional regulator/biotin--[acetyl-CoA-carboxylase] ligase	unclassified	0	0	0	0	0	0	0	0	0.823095	0	0	0
B7	AccC	D	UniRef50_G6ENB9: Biotin carboxylase	TOTAL	0	0.239828	0	0	0.284904	0.184078	0.252287	0	0	1.25135	0	0
B7	AccC	D	UniRef50_G6ENB9: Biotin carboxylase	unclassified	0	0.239828	0	0	0.284904	0.184078	0.252287	0	0	1.25135	0	0
B7	AccB	D	UniRef50_I4D4Z9: Acetyl-CoA carboxylase, biotin carboxylase subunit	g__Acutalibacter.s__Acutalibacter_muris	0.512968	0.357265	0	2.40602	0.273024	0	0	1.4644	0.25375	0.287831	0	0
B7	AccB	D	UniRef50_I4D4Z9: Acetyl-CoA carboxylase, biotin carboxylase subunit	TOTAL	0.512968	0.357265	0	2.40602	0.273024	0	0	1.4644	0.25375	0.287831	0	0
B7	BioB	S	UniRef50_J9UV90: Putative biotin synthase	TOTAL	1.87378	2.11729	0	0	0	0	0	0	0	0	0	0
B7	BioB	S	UniRef50_J9UV90: Putative biotin synthase	unclassified	1.87378	2.11729	0	0	0	0	0	0	0	0	0	0
B7	BioB	S	UniRef50_K1RN14: Biotin synthase (Fragment)	TOTAL	4.42598	1.40607	0	1.26154	0	0.375299	0	0	1.10873	1.90947	1.66374	1.67936
B7	BioB	S	UniRef50_K1RN14: Biotin synthase (Fragment)	unclassified	4.42598	1.40607	0	1.26154	0	0.375299	0	0	1.10873	1.90947	1.66374	1.67936
B7	BioA	S	UniRef50_K1SQW3: Adenosylmethionine-8-amino-7-oxononanoate aminotransferase (Fragment)	TOTAL	0	0	0	0	0	0	0.872567	0.625	0	0	0	0
B7	BioA	S	UniRef50_K1SQW3: Adenosylmethionine-8-amino-7-oxononanoate aminotransferase (Fragment)	unclassified	0	0	0	0	0	0	0.872567	0.625	0	0	0	0
B7	AccB	D	UniRef50_N1ZHA2: Acetyl-CoA carboxylase, biotin carboxyl carrier protein	g__Clostridium.s__Clostridium_sp_ASF356	7.80254	2.76539	2.29798	0	0	0.351059	0.537812	0.642353	0	0	0	0
B7	AccB	D	UniRef50_N1ZHA2: Acetyl-CoA carboxylase, biotin carboxyl carrier protein	TOTAL	10.1318	3.92197	3.37211	0.60247	1.69355	2.4212	2.66489	1.27749	0.625611	1.35215	2.40713	0
B7	AccB	D	UniRef50_N1ZHA2: Acetyl-CoA carboxylase, biotin carboxyl carrier protein	unclassified	2.32924	1.15659	1.07413	0.60247	1.69355	2.07015	2.12708	0.635137	0.625611	1.35215	2.40713	0
B7	BioB	S	UniRef50_N2AGQ6: Biotin synthase	TOTAL	11.3712	10.3405	5.71156	5.41334	0	1.01164	0	0	2.10156	5.80281	1.5907	3.18534
B7	BioB	S	UniRef50_N2AGQ6: Biotin synthase	unclassified	11.3712	10.3405	5.71156	5.41334	0	1.01164	0	0	2.10156	5.80281	1.5907	3.18534
B7	BioA	S	UniRef50_P12995: Adenosylmethionine-8-amino-7-oxononanoate aminotransferase	g__Parabacteroides.s__Parabacteroides_goldsteinii	0	0.261863	0	0	0	0	0	0	0	0	0	0
B7	BioA	S	UniRef50_P12995: Adenosylmethionine-8-amino-7-oxononanoate aminotransferase	TOTAL	0	0.261863	0	0	0	0	0	0	0	0	0	0
B7	AccB	D	UniRef50_R5ANG3: Putative acetyl-CoA carboxylase biotin carboxyl carrier protein subunit	TOTAL	3.40232	2.50738	10.0548	7.40509	5.05386	2.96049	3.32975	3.70001	1.0005	0.689301	0.220743	0.200727
B7	AccB	D	UniRef50_R5ANG3: Putative acetyl-CoA carboxylase biotin carboxyl carrier protein subunit	unclassified	3.40232	2.50738	10.0548	7.40509	5.05386	2.96049	3.32975	3.70001	1.0005	0.689301	0.220743	0.200727
B7	BioA	S	UniRef50_R5CHQ7: Adenosylmethionine-8-amino-7-oxononanoate aminotransferase	TOTAL	1.13401	0.974301	0.886921	1.29107	3.40567	2.71028	1.85713	5.33258	1.03382	0.58724	0	0.373023
B7	BioA	S	UniRef50_R5CHQ7: Adenosylmethionine-8-amino-7-oxononanoate aminotransferase	unclassified	1.13401	0.974301	0.886921	1.29107	3.40567	2.71028	1.85713	5.33258	1.03382	0.58724	0	0.373023
B7	UbiE	S	UniRef50_R5V392: Methylase involved in ubiquinone/menaquinone biosynthesis	g__Bacteroides.s__Bacteroides_dorei	0	0	0	0	0.443815	0.241429	0.887389	0	0	0	0	0
B7	UbiE	S	UniRef50_R5V392: Methylase involved in ubiquinone/menaquinone biosynthesis	g__Muribaculaceae_unclassified.s__Muribaculaceae_bacterium_DSM_103720	0	0	0	0.127715	0.261228	0.174077	0.440098	0	0	0	0	0
B7	UbiE	S	UniRef50_R5V392: Methylase involved in ubiquinone/menaquinone biosynthesis	g__Parabacteroides.s__Parabacteroides_goldsteinii	0	0	0	0.175984	0.329413	0.0912487	0	0	0	0	0	0
B7	UbiE	S	UniRef50_R5V392: Methylase involved in ubiquinone/menaquinone biosynthesis	TOTAL	0	0	0	0.303698	1.03446	0.506755	1.32749	0	0	0	0	0
B7	AccB	D	UniRef50_R6C950: Acetyl-CoA carboxylase biotin carboxylase	TOTAL	0	0.704004	0	0	0.725594	0.769478	1.92951	0.799326	0	1.82871	0	0
B7	AccB	D	UniRef50_R6C950: Acetyl-CoA carboxylase biotin carboxylase	unclassified	0	0.704004	0	0	0.725594	0.769478	1.92951	0.799326	0	1.82871	0	0
B7	AccB	D	UniRef50_R6EX01: Acetyl-CoA carboxylase biotin carboxylase	TOTAL	9.91294	2.12237	1.92503	0.924957	0.838674	0.677082	1.55924	1.57059	35.8448	36.1706	50.4131	17.3896
B7	AccB	D	UniRef50_R6EX01: Acetyl-CoA carboxylase biotin carboxylase	unclassified	9.91294	2.12237	1.92503	0.924957	0.838674	0.677082	1.55924	1.57059	35.8448	36.1706	50.4131	17.3896
B7	BioB	S	UniRef50_R6FP23: Biotin synthase	TOTAL	0	0.406521	0	0.402893	0.626068	0	0.479297	1.30362	0	0	0	0
B7	BioB	S	UniRef50_R6FP23: Biotin synthase	unclassified	0	0.406521	0	0.402893	0.626068	0	0.479297	1.30362	0	0	0	0
B7	BioB	S	UniRef50_R6M809: Biotin synthase	TOTAL	0	0	0	0	0.280783	0	0	0	0	0	0	0
B7	BioB	S	UniRef50_R6M809: Biotin synthase	unclassified	0	0	0	0	0.280783	0	0	0	0	0	0	0
B7	AccB	D	UniRef50_R6N947: Acetyl-CoA carboxylase biotin carboxyl carrier protein	TOTAL	0	0	0	0.186249	0	0.28732	0	0	0.330107	0.710278	0.918898	0
B7	AccB	D	UniRef50_R6N947: Acetyl-CoA carboxylase biotin carboxyl carrier protein	unclassified	0	0	0	0.186249	0	0.28732	0	0	0.330107	0.710278	0.918898	0
B7	AccB	D	UniRef50_R6P4L2: Acetyl-CoA carboxylase biotin carboxylase subunit	TOTAL	0	0	0	0	0	0	0	0	1.8033	1.40668	1.1294	0.543248
B7	AccB	D	UniRef50_R6P4L2: Acetyl-CoA carboxylase biotin carboxylase subunit	unclassified	0	0	0	0	0	0	0	0	1.8033	1.40668	1.1294	0.543248
B7	AccB	D	UniRef50_R6P786: Acetyl-CoA carboxylase biotin carboxylase subunit	TOTAL	0	0	0	0	0	0	0	0	0	0.328022	0	0
B7	AccB	D	UniRef50_R6P786: Acetyl-CoA carboxylase biotin carboxylase subunit	unclassified	0	0	0	0	0	0	0	0	0	0.328022	0	0
B7	UbiE	S	UniRef50_R6R320: Methylase involved in ubiquinone/menaquinone biosynthesis	TOTAL	3.32788	0	0	0	0	0.489984	0	0	0	0	0	0
B7	UbiE	S	UniRef50_R6R320: Methylase involved in ubiquinone/menaquinone biosynthesis	unclassified	3.32788	0	0	0	0	0.489984	0	0	0	0	0	0
B7	BirA	D	UniRef50_R6Y892: BirA biotin-[acetyl-CoA-carboxylase] ligase region	g__Acutalibacter.s__Acutalibacter_muris	1.00237	0.877062	0	1.63909	0	0	0	0	0	0	0	0
B7	BirA	D	UniRef50_R6Y892: BirA biotin-[acetyl-CoA-carboxylase] ligase region	TOTAL	1.00237	0.877062	0	1.97741	0	0	0	0	0	0	0	0
B7	BirA	D	UniRef50_R6Y892: BirA biotin-[acetyl-CoA-carboxylase] ligase region	unclassified	0	0	0	0.338317	0	0	0	0	0	0	0	0
B7	BioD	S	UniRef50_R6YY52: ATP-dependent dethiobiotin synthetase BioD	TOTAL	0	0.44741	0	0.827918	0	0	0	0	0.201172	0	0	0
B7	BioD	S	UniRef50_R6YY52: ATP-dependent dethiobiotin synthetase BioD	unclassified	0	0.44741	0	0.827918	0	0	0	0	0.201172	0	0	0
B7	BirA	D	UniRef50_R7AW31: Biotin--[acetyl-CoA-carboxylase] ligase	g__Lachnospiraceae_unclassified.s__Lachnospiraceae_bacterium_10_1	0.248975	1.814	1.02416	0.646731	0	0	0	0.635899	0	0	0	0
B7	BirA	D	UniRef50_R7AW31: Biotin--[acetyl-CoA-carboxylase] ligase	TOTAL	0.248975	1.814	1.02416	0.646731	0	0	0	0.635899	0	1.09022	0.455669	0
B7	BirA	D	UniRef50_R7AW31: Biotin--[acetyl-CoA-carboxylase] ligase	unclassified	0	0	0	0	0	0	0	0	0	1.09022	0.455669	0
B7	BirA	D	UniRef50_R7DML6: Biotin--[acetyl-CoA-carboxylase] ligase	g__Bacteroides.s__Bacteroides_caecimuris	0.0522097	0.242587	0	0.0653507	0.366871	0.279549	0.103788	0.247926	0.523385	0.100516	0.0638994	0.0581051
B7	BirA	D	UniRef50_R7DML6: Biotin--[acetyl-CoA-carboxylase] ligase	g__Bacteroides.s__Bacteroides_dorei	0	0	0	0	0.362251	0.100334	0.614642	0	0	0	0	0
B7	BirA	D	UniRef50_R7DML6: Biotin--[acetyl-CoA-carboxylase] ligase	g__Bacteroides.s__Bacteroides_uniformis	1.2526	0.0474763	0.423132	1.50274	0.195874	0.223814	0.0999907	0.119692	0.28453	0.516385	0.187584	0.483093
B7	BirA	D	UniRef50_R7DML6: Biotin--[acetyl-CoA-carboxylase] ligase	g__Parabacteroides.s__Parabacteroides_goldsteinii	0.0263551	0	0	0	0	0.0256385	0	0.0833733	0.0293343	0	0	0
B7	BirA	D	UniRef50_R7DML6: Biotin--[acetyl-CoA-carboxylase] ligase	TOTAL	1.33117	0.290063	0.423132	1.56809	0.924996	0.629335	0.818421	0.450991	0.837249	0.616901	0.251484	0.541198
B7	AccB	D	UniRef50_R7F8P5: Acetyl-CoA carboxylase biotin carboxylase	TOTAL	1.7225	0.600326	0	0	0.494864	0.335092	0	0	1.34246	2.95264	2.68792	1.5308
B7	AccB	D	UniRef50_R7F8P5: Acetyl-CoA carboxylase biotin carboxylase	unclassified	1.7225	0.600326	0	0	0.494864	0.335092	0	0	1.34246	2.95264	2.68792	1.5308
B7	AccB	D	UniRef50_R7FAU6: Acetyl-CoA carboxylase biotin carboxylase	TOTAL	2.33683	0.667572	1.24609	0	0	0	0	0.378988	5.7941	4.96703	13.7098	7.42861
B7	AccB	D	UniRef50_R7FAU6: Acetyl-CoA carboxylase biotin carboxylase	unclassified	2.33683	0.667572	1.24609	0	0	0	0	0.378988	5.7941	4.96703	13.7098	7.42861
B7	BirA	D	UniRef50_R7HRG9: Biotin-[acetyl-CoA-carboxylase] ligase	g__Muribaculum.s__Muribaculum_intestinale	0.997201	0.675731	1.30401	1.28029	0.687968	0.235274	0	1.10683	0	0	0	0
B7	BirA	D	UniRef50_R7HRG9: Biotin-[acetyl-CoA-carboxylase] ligase	TOTAL	0.997201	0.675731	1.30401	1.28029	0.687968	0.235274	0	1.10683	0	0	0	0
B7	BioA	S	UniRef50_R7J684: Adenosylmethionine-8-amino-7-oxononanoate aminotransferase	TOTAL	0.643887	0	0.441864	0.805705	1.07573	0	0	0	0	0	0	0.523329
B7	BioA	S	UniRef50_R7J684: Adenosylmethionine-8-amino-7-oxononanoate aminotransferase	unclassified	0.643887	0	0.441864	0.805705	1.07573	0	0	0	0	0	0	0.523329
B7	AccB	D	UniRef50_R7J8D4: Acetyl-CoA carboxylase biotin carboxyl carrier protein	TOTAL	0	0	0	0	0.923712	0	1.43602	0.762451	0	0	0	0
B7	AccB	D	UniRef50_R7J8D4: Acetyl-CoA carboxylase biotin carboxyl carrier protein	unclassified	0	0	0	0	0.923712	0	1.43602	0.762451	0	0	0	0
B7	BirA	D	UniRef50_R7KRH4: Biotin--[acetyl-CoA-carboxylase] ligase	TOTAL	0	0	0	0	0	0.663922	0	0	0	0	0	0
B7	BirA	D	UniRef50_R7KRH4: Biotin--[acetyl-CoA-carboxylase] ligase	unclassified	0	0	0	0	0	0.663922	0	0	0	0	0	0
B7	BioB	S	UniRef50_R7LWH9: Biotin synthase	TOTAL	0	0	0	0	0.401508	0	0	0	0	0	0	0
B7	BioB	S	UniRef50_R7LWH9: Biotin synthase	unclassified	0	0	0	0	0.401508	0	0	0	0	0	0	0
B7	AccB	D	UniRef50_R9L9K4: Acetyl-CoA carboxylase, biotin carboxyl carrier protein	g__Anaerotruncus.s__Anaerotruncus_sp_G3_2012	0	0	0	0	0	0.397969	0	0	0.35425	0.65604	0.722892	0
B7	AccB	D	UniRef50_R9L9K4: Acetyl-CoA carboxylase, biotin carboxyl carrier protein	TOTAL	0	0	0	0	0	0.397969	0	0	0.35425	0.65604	0.722892	0
B7	BirA	D	UniRef50_R9LWK5: Biotin-[acetyl-CoA-carboxylase] ligase	g__Anaerotruncus.s__Anaerotruncus_sp_G3_2012	0	0	0	0.573047	0.407131	1.04559	0	0.59867	0.310389	0	0	0
B7	BirA	D	UniRef50_R9LWK5: Biotin-[acetyl-CoA-carboxylase] ligase	TOTAL	0	0	0	0.573047	0.407131	1.04559	0	0.59867	0.310389	0	0	0
B7	BirA	D	UniRef50_V2Q987: Biotin-[acetyl-CoA-carboxylase] ligase	g__Mucispirillum.s__Mucispirillum_schaedleri	0	0	0	0	0	0.277118	0	0	0.402431	1.26859	0.695374	0.546787
B7	BirA	D	UniRef50_V2Q987: Biotin-[acetyl-CoA-carboxylase] ligase	TOTAL	0	0	0	0	0	0.277118	0	0	0.402431	1.26859	0.695374	0.546787
B7	BirA	D	UniRef50_V2QB73: Biotin-[acetyl-CoA-carboxylase] ligase	g__Mucispirillum.s__Mucispirillum_schaedleri	2.60413	0.336808	0	1.13641	0	1.6295	0	0.287426	4.98729	40.8872	23.5748	25.0945
B7	BirA	D	UniRef50_V2QB73: Biotin-[acetyl-CoA-carboxylase] ligase	TOTAL	2.60413	0.336808	0	1.13641	0	1.6295	0	0.287426	4.98729	40.8872	23.5748	25.0945
B7	BioD	S	UniRef50_V2QG65: ATP-dependent dethiobiotin synthetase BioD	g__Mucispirillum.s__Mucispirillum_schaedleri	1.22712	0.250145	0	0	0	1.33835	0	0	5.82829	28.1935	19.7452	19.8275
B7	BioD	S	UniRef50_V2QG65: ATP-dependent dethiobiotin synthetase BioD	TOTAL	1.22712	0.250145	0	0	0	1.33835	0	0	5.82829	28.1935	19.7452	19.8275
B7	AccB	D	UniRef50_V2RHJ5: Acetyl-CoA carboxylase, biotin carboxylase subunit	g__Mucispirillum.s__Mucispirillum_schaedleri	1.53513	0	0.394169	0.588553	27.4213	10.672	26.692	18.4855	53.0407	76.2656	111.296	89.9908
B7	AccB	D	UniRef50_V2RHJ5: Acetyl-CoA carboxylase, biotin carboxylase subunit	TOTAL	1.53513	0	0.394169	0.588553	27.4213	10.672	26.692	18.4855	53.0407	76.2656	111.296	89.9908
B7	AccB	D	UniRef50_V2XY17: Acetyl-CoA carboxylase, biotin carboxyl carrier protein	g__Firmicutes_unclassified.s__Firmicutes_bacterium_ASF500	0.313487	0	0	0	0	0.203308	0	0	1.80311	1.40539	0.830692	0
B7	AccB	D	UniRef50_V2XY17: Acetyl-CoA carboxylase, biotin carboxyl carrier protein	TOTAL	0.313487	0	0	0	0	0.692569	0	0	3.6571	3.53805	3.76149	0.739408
B7	AccB	D	UniRef50_V2XY17: Acetyl-CoA carboxylase, biotin carboxyl carrier protein	unclassified	0	0	0	0	0	0.48926	0	0	1.85399	2.13266	2.93079	0.739408
B7	BioA	S	UniRef50_W4PUL9: Adenosylmethionine-8-amino-7-oxononanoate aminotransferase	TOTAL	0.357375	0	0.340146	0	0	0.173829	0	0	0	0.171882	0	0
B7	BioA	S	UniRef50_W4PUL9: Adenosylmethionine-8-amino-7-oxononanoate aminotransferase	unclassified	0.357375	0	0.340146	0	0	0.173829	0	0	0	0.171882	0	0
B7	AccB	D	UniRef50_W7DNU4: Acetyl-CoA carboxylase biotin carboxylase subunit	TOTAL	0	0	0	0	0	0.310842	0	0	0	0.920799	0	0
B7	AccB	D	UniRef50_W7DNU4: Acetyl-CoA carboxylase biotin carboxylase subunit	unclassified	0	0	0	0	0	0.310842	0	0	0	0.920799	0	0
B9	FolA	S	UniRef50_D7GU12: Dihydrofolate reductase	TOTAL	1.59756	0	0	0.590685	2.14889	2.59695	0	0	0.835138	2.59411	1.4617	1.06714
B9	FolA	S	UniRef50_D7GU12: Dihydrofolate reductase	unclassified	1.59756	0	0	0.590685	2.14889	2.59695	0	0	0.835138	2.59411	1.4617	1.06714
B9		D	UniRef50_G8QVA6: Phosphoribosylglycinamide formyltransferase, formyltetrahydrofolate-dependent	TOTAL	0	0	0	0	0	0.817088	0	0	0.985076	1.17358	0	0
B9		D	UniRef50_G8QVA6: Phosphoribosylglycinamide formyltransferase, formyltetrahydrofolate-dependent	unclassified	0	0	0	0	0	0.817088	0	0	0.985076	1.17358	0	0
B9	FolA	S	UniRef50_H1LUL9: Dihydrofolate reductase	TOTAL	0	0	0	0	0	0	1.08886	0	0	0	0.549735	0.303389
B9	FolA	S	UniRef50_H1LUL9: Dihydrofolate reductase	unclassified	0	0	0	0	0	0	1.08886	0	0	0	0.549735	0.303389
B9	FolKP	S	UniRef50_J1P2C0: Bifunctional folate synthesis protein domain protein	TOTAL	0	0	0.258539	0	0	0	0	0	0	0	0	0
B9	FolKP	S	UniRef50_J1P2C0: Bifunctional folate synthesis protein domain protein	unclassified	0	0	0.258539	0	0	0	0	0	0	0	0	0
B9	FolP	S	UniRef50_J9G0W7: Dihydropteroate synthase, DHPS	TOTAL	59.2474	44.7388	59.2544	38.4299	48.5075	56.4735	71.7828	40.279	16.96	16.462	9.29771	15.7317
B9	FolP	S	UniRef50_J9G0W7: Dihydropteroate synthase, DHPS	unclassified	59.2474	44.7388	59.2544	38.4299	48.5075	56.4735	71.7828	40.279	16.96	16.462	9.29771	15.7317
B9	FolP	S	UniRef50_J9H7C6: Dihydropteroate synthase	TOTAL	0	0	0	0	0	0.439322	0	0	0	0	0	0
B9	FolP	S	UniRef50_J9H7C6: Dihydropteroate synthase	unclassified	0	0	0	0	0	0.439322	0	0	0	0	0	0
B9	FolP	S	UniRef50_K1S9H2: Dihydropteroate synthase (Fragment)	TOTAL	0	0	0	0	1.73702	0.598611	0.982588	0.584763	0	0	0	0
B9	FolP	S	UniRef50_K1S9H2: Dihydropteroate synthase (Fragment)	unclassified	0	0	0	0	1.73702	0.598611	0.982588	0.584763	0	0	0	0
B9	Fpgs	S	UniRef50_K1T9E7: Tetrahydrofolate synthase (Fragment)	TOTAL	0	0	0.515554	0	1.07357	0.411069	0	0	0.450681	0.569055	0	0
B9	Fpgs	S	UniRef50_K1T9E7: Tetrahydrofolate synthase (Fragment)	unclassified	0	0	0.515554	0	1.07357	0.411069	0	0	0.450681	0.569055	0	0
B9	FolE1	S	UniRef50_K1TK05: GTP cyclohydrolase I	TOTAL	0	0	0	0	0	0	1.76926	0	0	0	0	0
B9	FolE1	S	UniRef50_K1TK05: GTP cyclohydrolase I	unclassified	0	0	0	0	0	0	1.76926	0	0	0	0	0
B9	FolE1	S	UniRef50_K1U6R3: GTP cyclohydrolase I (Fragment)	TOTAL	2.62949	0	0.199574	1.55657	3.78327	2.71698	1.8413	2.21635	0.345915	1.05151	0	0.345599
B9	FolE1	S	UniRef50_K1U6R3: GTP cyclohydrolase I (Fragment)	unclassified	2.62949	0	0.199574	1.55657	3.78327	2.71698	1.8413	2.21635	0.345915	1.05151	0	0.345599
B9	PabAc	S	UniRef50_K1U8J4: Aminodeoxychorismate lyase (Fragment)	TOTAL	0	0.159039	0	0	0	0.388755	0	0	0	0	0	0
B9	PabAc	S	UniRef50_K1U8J4: Aminodeoxychorismate lyase (Fragment)	unclassified	0	0.159039	0	0	0	0.388755	0	0	0	0	0	0
B9	FolA	S	UniRef50_K1U8Y5: Protein containing Tetrahydrofolate dehydrogenase/cyclohydrolase domain protein (Fragment)	TOTAL	0	0	0	0	0	0	0	0	0	0	0	0.162885
B9	FolA	S	UniRef50_K1U8Y5: Protein containing Tetrahydrofolate dehydrogenase/cyclohydrolase domain protein (Fragment)	unclassified	0	0	0	0	0	0	0	0	0	0	0	0.162885
B9	--	S	UniRef50_K1UTF5: Synthase/dihydrofolate synthase (Fragment)	TOTAL	0	0	0	0	0	0	0	0	0.791711	0.845797	0.589284	0.372309
B9	--	S	UniRef50_K1UTF5: Synthase/dihydrofolate synthase (Fragment)	unclassified	0	0	0	0	0	0	0	0	0.791711	0.845797	0.589284	0.372309
B9	FolP	S	UniRef50_R5A9H4: Dihydropteroate synthase	TOTAL	0	0	0	0	0	0.438436	0	0	0	0	0	0
B9	FolP	S	UniRef50_R5A9H4: Dihydropteroate synthase	unclassified	0	0	0	0	0	0.438436	0	0	0	0	0	0
B9	FolB	S	UniRef50_R5AND0: Dihydroneopterin aldolase	TOTAL	0	0	0	0	1.11447	0	0	0	0	0	0	0
B9	FolB	S	UniRef50_R5AND0: Dihydroneopterin aldolase	unclassified	0	0	0	0	1.11447	0	0	0	0	0	0	0
B9	FolB	S	UniRef50_R5BBF4: Dihydroneopterin aldolase	g__Muribaculum.s__Muribaculum_intestinale	2.02744	0.647243	3.5493	1.90184	1.37596	0.369848	1.00667	1.40315	0	0	0	0
B9	FolB	S	UniRef50_R5BBF4: Dihydroneopterin aldolase	TOTAL	2.02744	0.647243	3.5493	1.90184	1.37596	0.369848	1.00667	1.40315	0	0	0	0
B9	FolA	S	UniRef50_R5P1D3: Dihydrofolate reductase	TOTAL	0.649706	0.974499	0	0	0	0	0	0	0.83286	0	0.305389	0
B9	FolA	S	UniRef50_R5P1D3: Dihydrofolate reductase	unclassified	0.649706	0.974499	0	0	0	0	0	0	0.83286	0	0.305389	0
B9	FolK	S	UniRef50_R5S9V1: 2-amino-4-hydroxy-6-hydroxymethyldihydropteridine pyrophosphokinase	g__Bacteroides.s__Bacteroides_uniformis	1.2895	0.741071	0.464787	1.84303	1.01966	0.537615	0.56923	0.773445	1.57172	0	0	0
B9	FolK	S	UniRef50_R5S9V1: 2-amino-4-hydroxy-6-hydroxymethyldihydropteridine pyrophosphokinase	TOTAL	1.2895	0.741071	0.464787	1.84303	1.01966	0.537615	0.56923	0.773445	1.57172	0	0	0
B9	FolA	S	UniRef50_R5SM69: Dihydrofolate reductase	TOTAL	0	0	0	0.572172	0	0.858439	0	0	0	0	0	0
B9	FolA	S	UniRef50_R5SM69: Dihydrofolate reductase	unclassified	0	0	0	0.572172	0	0.858439	0	0	0	0	0	0
B9	FolB	S	UniRef50_R6DGX8: Dihydroneopterin aldolase	TOTAL	0	0	0	0	0	0	0	0	0	0	0	0.172467
B9	FolB	S	UniRef50_R6DGX8: Dihydroneopterin aldolase	unclassified	0	0	0	0	0	0	0	0	0	0	0	0.172467
B9	FolK	S	UniRef50_R6FYK4: 2-amino-4-hydroxy-6-hydroxymethyldihydropteridine pyrophosphokinase	TOTAL	1.01618	1.25905	0	0	1.44288	0	0	0	0	0.688142	0	0.879521
B9	FolK	S	UniRef50_R6FYK4: 2-amino-4-hydroxy-6-hydroxymethyldihydropteridine pyrophosphokinase	unclassified	1.01618	1.25905	0	0	1.44288	0	0	0	0	0.688142	0	0.879521
B9	FolA	S	UniRef50_R6RZH2: Dihydrofolate reductase	TOTAL	0.657101	1.35699	0.620102	1.40085	0	1.49115	0.679653	0.769707	0	0	0	0
B9	FolA	S	UniRef50_R6RZH2: Dihydrofolate reductase	unclassified	0.657101	1.35699	0.620102	1.40085	0	1.49115	0.679653	0.769707	0	0	0	0
B9	FolP	S	UniRef50_R6Z6M9: Dihydropteroate synthase	TOTAL	0	0.596393	0.817647	0.655814	3.74589	4.10164	2.66435	2.97945	2.31076	2.32664	2.0941	1.78511
B9	FolP	S	UniRef50_R6Z6M9: Dihydropteroate synthase	unclassified	0	0.596393	0.817647	0.655814	3.74589	4.10164	2.66435	2.97945	2.31076	2.32664	2.0941	1.78511
B9	FolA	S	UniRef50_R6ZT21: Dihydrofolate reductase	TOTAL	0.179568	0	0	0	0	0.213724	0	0	0	0	0	0
B9	FolA	S	UniRef50_R6ZT21: Dihydrofolate reductase	unclassified	0.179568	0	0	0	0	0.213724	0	0	0	0	0	0
B9	FolA	S	UniRef50_R7BS51: Dihydrofolate reductase	TOTAL	0	0	0	0	0	0	0	0	0	0.319837	0	0
B9	FolA	S	UniRef50_R7BS51: Dihydrofolate reductase	unclassified	0	0	0	0	0	0	0	0	0	0.319837	0	0
B9	FolP	S	UniRef50_R7EUG1: Dihydropteroate synthase	g__Muribaculum.s__Muribaculum_intestinale	1.71766	1.46733	1.72094	1.54727	0.848576	0	1.45623	0.904541	0	0	0	0
B9	FolP	S	UniRef50_R7EUG1: Dihydropteroate synthase	TOTAL	1.71766	1.46733	1.72094	1.54727	0.848576	0	1.45623	0.904541	0	0	0	0
B9	FolA	S	UniRef50_R7LHD4: Dihydrofolate reductase	g__Bacteroides.s__Bacteroides_caecimuris	0	0	0	0	0	0.165551	0	0	0	0	0	0
B9	FolA	S	UniRef50_R7LHD4: Dihydrofolate reductase	TOTAL	0	0	0	0	0	0.165551	0	0	0	0	0	0
B9	FolA	S	UniRef50_R9K3S8: Dihydrofolate reductase	g__Lachnospiraceae_unclassified.s__Lachnospiraceae_bacterium_M18_1	0	0	0	0	0	0	0	0	0.494127	0.960834	0	0.905056
B9	FolA	S	UniRef50_R9K3S8: Dihydrofolate reductase	TOTAL	7.46038	5.36472	4.49316	2.52178	3.64908	5.08254	4.28609	2.33889	4.00754	7.13413	7.53865	5.68706
B9	FolA	S	UniRef50_R9K3S8: Dihydrofolate reductase	unclassified	7.46038	5.36472	4.49316	2.52178	3.64908	5.08254	4.28609	2.33889	3.51342	6.17329	7.53865	4.78201
B9	FolP	S	UniRef50_U5RW10: Dihydropteroate synthase	g__Lachnospiraceae_unclassified.s__Lachnospiraceae_bacterium_A2	0	0	2.3221	0.404225	0	0	0	0.547696	0.822269	0.599561	0	0
B9	FolP	S	UniRef50_U5RW10: Dihydropteroate synthase	TOTAL	0	0	2.3221	0.404225	0	0	0	0.547696	0.822269	0.599561	0	0
B9	FolP	S	UniRef50_V2QAA7: Dihydropteroate synthase	g__Mucispirillum.s__Mucispirillum_schaedleri	0	0	0	0	1.45603	1.26505	1.5732	0.964927	3.30441	6.26867	6.83101	3.78388
B9	FolP	S	UniRef50_V2QAA7: Dihydropteroate synthase	TOTAL	0	0	0	0	1.45603	1.26505	1.5732	0.964927	3.30441	6.26867	6.83101	3.78388
B9	FolE1	S	UniRef50_W3AJ91: GTP cyclohydrolase I (Fragment)	TOTAL	1.05957	0.381899	0	0	0	0.368795	0.311621	0	0.982429	0.791195	0	0.26169
B9	FolE1	S	UniRef50_W3AJ91: GTP cyclohydrolase I (Fragment)	unclassified	1.05957	0.381899	0	0	0	0.368795	0.311621	0	0.982429	0.791195	0	0.26169
B9	FolP	S	UniRef50_W7YIJ3: Dihydropteroate synthase	g__Muribaculaceae_unclassified.s__Muribaculaceae_bacterium_DSM_103720	0	0	0	0	0	0	0.247464	0	0	0	0	0
B9	FolP	S	UniRef50_W7YIJ3: Dihydropteroate synthase	TOTAL	0	0	0	0	0	0	0.247464	0	0	0	0	0
B12	CbiP	S	UniRef50_A6L4Y5: Cobyric acid synthase	g__Bacteroides.s__Bacteroides_dorei	0	0	0	0	0.241776	0.220969	0.116982	0	0	0	0	0
B12	CbiP	S	UniRef50_A6L4Y5: Cobyric acid synthase	g__Bacteroides.s__Bacteroides_uniformis	0.792214	0.229542	0.315336	0.92929	0.411246	0.0843244	0.16399	0	0	0.309698	0	0
B12	CbiP	S	UniRef50_A6L4Y5: Cobyric acid synthase	g__Parabacteroides.s__Parabacteroides_goldsteinii	0.0507996	0.0589657	0.420425	0.158848	0.0973338	0.0617378	0.151367	0	0	0.0732974	0	0
B12	CbiP	S	UniRef50_A6L4Y5: Cobyric acid synthase	TOTAL	0.843014	0.288507	0.735761	1.08814	2.71377	1.04315	1.2562	1.08751	0	0.382996	0	0
B12	CbiP	S	UniRef50_A6L4Y5: Cobyric acid synthase	unclassified	0	0	0	0	1.96342	0.67612	0.823865	1.08751	0	0	0	0
B12	CobT	S	UniRef50_A6LIW6: Nicotinate-nucleotide--dimethylbenzimidazole phosphoribosyltransferase	TOTAL	0	0	0.313968	0	0	0	0	0	0	0	0	0
B12	CobT	S	UniRef50_A6LIW6: Nicotinate-nucleotide--dimethylbenzimidazole phosphoribosyltransferase	unclassified	0	0	0.313968	0	0	0	0	0	0	0	0	0
B12	CbiP	S	UniRef50_B8I0R5: Cobyric acid synthase	g__Clostridium.s__Clostridium_sp_ASF356	0.722726	0.312395	0.269706	0	0.23848	0.0969756	0.115502	0.0788383	0	0.0239725	0	0
B12	CbiP	S	UniRef50_B8I0R5: Cobyric acid synthase	g__Collinsella.s__Collinsella_aerofaciens	0	0	0	0	0	0.0121985	0	0	0	0	0	0
B12	CbiP	S	UniRef50_B8I0R5: Cobyric acid synthase	g__Dorea.s__Dorea_sp_5_2	0.310766	0.334734	0.379994	0.279331	0.0158836	0.145177	0	0.236021	0.110723	0.0715869	0.0608312	0.442521
B12	CbiP	S	UniRef50_B8I0R5: Cobyric acid synthase	g__Lachnospiraceae_unclassified.s__Lachnospiraceae_bacterium_A4	0	18.8954	0	2.63023	0.0161763	0.0369848	0.083902	0.0200451	0.15516	0.0365707	0.108493	0.0704679
B12	CbiP	S	UniRef50_B8I0R5: Cobyric acid synthase	g__Lachnospiraceae_unclassified.s__Lachnospiraceae_bacterium_COE1	0	0	0	0	0.0323756	0.0739697	0.0335655	0.0601352	0.0705271	0.134093	0.170489	0.0704679
B12	CbiP	S	UniRef50_B8I0R5: Cobyric acid synthase	g__Mucispirillum.s__Mucispirillum_schaedleri	0.580483	0.0937455	0.112472	0.0947031	1.20823	0.99406	1.35364	1.11699	3.58149	6.0315	4.9526	6.71975
B12	CbiP	S	UniRef50_B8I0R5: Cobyric acid synthase	g__Oscillibacter.s__Oscillibacter_sp_1_3	0	0.0811675	0	0	0	0.0971789	0	0	0.0555937	0.648622	0.106901	0
B12	CbiP	S	UniRef50_B8I0R5: Cobyric acid synthase	TOTAL	1.61397	19.7174	0.762172	3.00426	1.51115	1.45654	1.58661	1.51203	3.97349	6.94634	5.39931	7.3032
B12	CobH	S	UniRef50_C0B8A3: Putative precorrin-8X methylmutase	TOTAL	2.85564	1.88489	1.89213	0.887845	0.275264	0.877539	1.2268	1.32772	1.72609	0.745616	0.818565	1.15015
B12	CobH	S	UniRef50_C0B8A3: Putative precorrin-8X methylmutase	unclassified	2.85564	1.88489	1.89213	0.887845	0.275264	0.877539	1.2268	1.32772	1.72609	0.745616	0.818565	1.15015
B12	HemE	D	UniRef50_D4LLT2: Uroporphyrinogen-III decarboxylase	TOTAL	0.296769	0.534987	0	3.18764	1.67191	2.29243	2.75107	2.48491	2.32231	0	0.576468	2.58188
B12	HemE	D	UniRef50_D4LLT2: Uroporphyrinogen-III decarboxylase	unclassified	0.296769	0.534987	0	3.18764	1.67191	2.29243	2.75107	2.48491	2.32231	0	0.576468	2.58188
B12	CobW	S	UniRef50_E0RYR0: Cobalamin biosynthesis protein CobW1	g__Lachnospiraceae_unclassified.s__Lachnospiraceae_bacterium_10_1	0.752394	3.64757	2.18176	1.67273	0	0	0	1.15683	0	0.0804129	0	0
B12	CobW	S	UniRef50_E0RYR0: Cobalamin biosynthesis protein CobW1	g__Lachnospiraceae_unclassified.s__Lachnospiraceae_bacterium_28_4	0	0	0	0	0	0	0	0	17.0013	0.562867	21.209	19.934
B12	CobW	S	UniRef50_E0RYR0: Cobalamin biosynthesis protein CobW1	g__Lachnospiraceae_unclassified.s__Lachnospiraceae_bacterium_A4	0	0.212014	0	4.11402	0.450908	0.607769	0	0.461177	2.40926	10.5144	6.11277	3.1235
B12	CobW	S	UniRef50_E0RYR0: Cobalamin biosynthesis protein CobW1	g__Lachnospiraceae_unclassified.s__Lachnospiraceae_bacterium_COE1	0	0	0	0	0.34583	0.303873	0	0.658824	0.231802	0.220362	0.0509408	0.185286
B12	CobW	S	UniRef50_E0RYR0: Cobalamin biosynthesis protein CobW1	TOTAL	1.80434	4.95141	2.18176	5.78675	2.16669	3.25542	2.42278	3.66893	20.4707	14.7661	28.9048	24.9234
B12	CobW	S	UniRef50_E0RYR0: Cobalamin biosynthesis protein CobW1	unclassified	1.05194	1.09182	0	0	1.36995	2.34378	2.42278	1.39209	0.828313	3.38801	1.53206	1.68061
B12	CobK	S	UniRef50_F7V357: Precorrin-6x reductase	TOTAL	0	0	0	0.396634	0	0	0	0	0	0	0	0
B12	CobK	S	UniRef50_F7V357: Precorrin-6x reductase	unclassified	0	0	0	0.396634	0	0	0	0	0	0	0	0
B12	CobF	S	UniRef50_F7V439: Precorrin-2 methylase	g__Lachnospiraceae_unclassified.s__Lachnospiraceae_bacterium_A2	0.37588	0.348956	7.76389	3.03762	0	0	0	0	0	0	0	0
B12	CobF	S	UniRef50_F7V439: Precorrin-2 methylase	TOTAL	0.37588	2.35104	7.76389	3.03762	0	0	0	0	0	0	0	0
B12	CobF	S	UniRef50_F7V439: Precorrin-2 methylase	unclassified	0	2.00209	0	0	0	0	0	0	0	0	0	0
B12	HemE	D	UniRef50_F8E6H8: Uroporphyrinogen decarboxylase	g__Mucispirillum.s__Mucispirillum_schaedleri	0	0	0	0	0.928689	0.483678	0	0.755109	1.61923	2.61535	2.48278	1.91549
B12	HemE	D	UniRef50_F8E6H8: Uroporphyrinogen decarboxylase	TOTAL	0	0	0	0	0.928689	0.483678	0	0.755109	1.61923	2.61535	2.48278	1.91549
B12	CbiT	S	UniRef50_G9RQE4: Precorrin-6Y C5,15-methyltransferase (Decarboxylating), CbiT subunit (Fragment)	TOTAL	0	0	0	0	0	0.391418	0	0	0	0	0	0
B12	CbiT	S	UniRef50_G9RQE4: Precorrin-6Y C5,15-methyltransferase (Decarboxylating), CbiT subunit (Fragment)	unclassified	0	0	0	0	0	0.391418	0	0	0	0	0	0
B12	HemE	D	UniRef50_H0UIF8: Uroporphyrinogen-III decarboxylase	g__Dorea.s__Dorea_sp_5_2	0	0	0	0	0	0.440053	0	0	0	0	0	0
B12	HemE	D	UniRef50_H0UIF8: Uroporphyrinogen-III decarboxylase	TOTAL	0	0	0	0	0	0.440053	0	0	0	0	0	0
B12	CobO	S	UniRef50_J6H172: ATP:cob(I)alamin adenosyltransferase	g__Bacteroides.s__Bacteroides_dorei	0	0	0	0	0	0	0.188932	0	0	0	0	0
B12	CobO	S	UniRef50_J6H172: ATP:cob(I)alamin adenosyltransferase	TOTAL	0	0	0	0	0	0	0.188932	0	0	0	0	0
B12	HemE	D	UniRef50_J9C4L0: Uroporphyrinogen-III synthase (Fragment)	TOTAL	13.8714	2.01665	1.51948	1.21339	12.8818	4.19053	5.69881	10.7906	2.95855	1.27028	1.0253	1.78995
B12	HemE	D	UniRef50_J9C4L0: Uroporphyrinogen-III synthase (Fragment)	unclassified	13.8714	2.01665	1.51948	1.21339	12.8818	4.19053	5.69881	10.7906	2.95855	1.27028	1.0253	1.78995
B12	HemD	S	UniRef50_J9FDB7: Uroporphyrinogen III synthase HEM4	TOTAL	0	0	0.413887	0	1.24379	0.387199	1.28667	1.37802	0	0	0.243664	0
B12	HemD	S	UniRef50_J9FDB7: Uroporphyrinogen III synthase HEM4	unclassified	0	0	0.413887	0	1.24379	0.387199	1.28667	1.37802	0	0	0.243664	0
B12	CobQ	S	UniRef50_K1S878: Cobyric acid synthase CobQ	TOTAL	3.2072	0	0.416796	0	0	0	0	0	0	0.408682	0	0.51504
B12	CobQ	S	UniRef50_K1S878: Cobyric acid synthase CobQ	unclassified	3.2072	0	0.416796	0	0	0	0	0	0	0.408682	0	0.51504
B12	CobT	S	UniRef50_K1S9E1: Nicotinate-nucleotide-dimethylbenzimidazole phosphoribosyltransferase (Fragment)	TOTAL	1.41306	0.328839	0	0.929699	0.901702	0	0	1.00086	0.951792	0.607858	0.454715	0
B12	CobT	S	UniRef50_K1S9E1: Nicotinate-nucleotide-dimethylbenzimidazole phosphoribosyltransferase (Fragment)	unclassified	1.41306	0.328839	0	0.929699	0.901702	0	0	1.00086	0.951792	0.607858	0.454715	0
B12	CobQ	S	UniRef50_K1SNW6: Cobyric acid synthase CobQ	TOTAL	5.81323	4.92523	3.80954	2.06989	0.843865	1.12326	1.62857	1.74326	0.860194	1.25967	1.83611	0.594432
B12	CobQ	S	UniRef50_K1SNW6: Cobyric acid synthase CobQ	unclassified	5.81323	4.92523	3.80954	2.06989	0.843865	1.12326	1.62857	1.74326	0.860194	1.25967	1.83611	0.594432
B12	CobB	S	UniRef50_K1TGF6: Protein containing Cobyrinic acid a,c-diamide synthase domain protein	TOTAL	0.48142	0.947904	0.936198	0.765954	3.51134	3.74923	2.84494	1.92183	3.31396	1.89734	1.83712	1.98402
B12	CobB	S	UniRef50_K1TGF6: Protein containing Cobyrinic acid a,c-diamide synthase domain protein	unclassified	0.48142	0.947904	0.936198	0.765954	3.51134	3.74923	2.84494	1.92183	3.31396	1.89734	1.83712	1.98402
B12	CobT	S	UniRef50_K1TU88: Nicotinate-nucleotide/dimethylbenzimidazole phosphoribosyltransferase (Fragment)	TOTAL	3.10184	0	0.324507	0	0	0	0	0	0	0	0	0
B12	CobT	S	UniRef50_K1TU88: Nicotinate-nucleotide/dimethylbenzimidazole phosphoribosyltransferase (Fragment)	unclassified	3.10184	0	0.324507	0	0	0	0	0	0	0	0	0
B12	CbiD	S	UniRef50_K1UA43: Cobalamin biosynthesis protein CbiD	TOTAL	1.21984	0.232726	0	0	0	0	0	0	0	0	0	0
B12	CbiD	S	UniRef50_K1UA43: Cobalamin biosynthesis protein CbiD	unclassified	1.21984	0.232726	0	0	0	0	0	0	0	0	0	0
B12	CobH	S	UniRef50_K1UJD5: Precorrin-8X methylmutase (Fragment)	TOTAL	4.48324	0	0.71542	0	0	0	0	0	0	0	0	0
B12	CobH	S	UniRef50_K1UJD5: Precorrin-8X methylmutase (Fragment)	unclassified	4.48324	0	0.71542	0	0	0	0	0	0	0	0	0
B12	HemD	S	UniRef50_K1UTR1: Uroporphyrinogen III synthase HEM4 (Fragment)	TOTAL	0.804749	1.65605	1.82555	0.568932	4.02221	5.17324	3.75146	3.92996	6.11358	4.307	4.10759	6.84619
B12	HemD	S	UniRef50_K1UTR1: Uroporphyrinogen III synthase HEM4 (Fragment)	unclassified	0.804749	1.65605	1.82555	0.568932	4.02221	5.17324	3.75146	3.92996	6.11358	4.307	4.10759	6.84619
B12	HemE	D	UniRef50_N1Z167: Uroporphyrinogen-III C-methyltransferase	TOTAL	0.794556	0.306491	0	0	0	0	0	0	0	0	0	0
B12	HemE	D	UniRef50_N1Z167: Uroporphyrinogen-III C-methyltransferase	unclassified	0.794556	0.306491	0	0	0	0	0	0	0	0	0	0
B12	CobT	S	UniRef50_N1ZDP9: Nicotinate-nucleotide--dimethylbenzimidazole phosphoribosyltransferase	TOTAL	0.236178	0	0	0	0	0	0	0	0	0	0	0
B12	CobT	S	UniRef50_N1ZDP9: Nicotinate-nucleotide--dimethylbenzimidazole phosphoribosyltransferase	unclassified	0.236178	0	0	0	0	0	0	0	0	0	0	0
B12	CobD	S	UniRef50_N1ZEZ5: Cobalamin biosynthesis protein CobD	TOTAL	1.32058	0.915368	0.899987	0	0.641427	0.669532	0.66485	0	0	0	0.591442	0
B12	CobD	S	UniRef50_N1ZEZ5: Cobalamin biosynthesis protein CobD	unclassified	1.32058	0.915368	0.899987	0	0.641427	0.669532	0.66485	0	0	0	0.591442	0
B12	CobB	S	UniRef50_N1ZI75: Cobyrinic acid A,C-diamide synthase	TOTAL	0.717616	0.419551	0	0	0.50933	0.458909	1.02074	0	0	0	0.325021	0
B12	CobB	S	UniRef50_N1ZI75: Cobyrinic acid A,C-diamide synthase	unclassified	0.717616	0.419551	0	0	0.50933	0.458909	1.02074	0	0	0	0.325021	0
B12	CobK	S	UniRef50_N1ZP98: Precorrin-6x reductase	TOTAL	1.50241	1.0014	0.73935	0	0.447423	0	0.768989	0	0	0	0	0
B12	CobK	S	UniRef50_N1ZP98: Precorrin-6x reductase	unclassified	1.50241	1.0014	0.73935	0	0.447423	0	0.768989	0	0	0	0	0
B12	HemE	D	UniRef50_N2AH06: Uroporphyrinogen-III C-methyltransferase	TOTAL	0	0	0	0	0	0	0	0	0	0.346149	0.533372	0
B12	HemE	D	UniRef50_N2AH06: Uroporphyrinogen-III C-methyltransferase	unclassified	0	0	0	0	0	0	0	0	0	0.346149	0.533372	0
B12	CbiP	S	UniRef50_R5A7I4: Cobyric acid synthase	TOTAL	0.52228	0	0	0	0	0	0	0	0	0	0.294545	0
B12	CbiP	S	UniRef50_R5A7I4: Cobyric acid synthase	unclassified	0.52228	0	0	0	0	0	0	0	0	0	0.294545	0
B12	CobO	S	UniRef50_R5AEA8: ATP:corrinoid adenosyltransferase BtuR/CobO/CobP	g__Clostridium.s__Clostridium_sp_ASF356	19.2636	8.13776	10.1779	0	1.63047	0.455266	2.31003	1.88298	0	1.14588	0	0
B12	CobO	S	UniRef50_R5AEA8: ATP:corrinoid adenosyltransferase BtuR/CobO/CobP	TOTAL	19.2636	8.13776	10.1779	0	1.63047	0.455266	2.31003	1.88298	0	1.14588	0	0
B12	CbiM	S	UniRef50_R5ASU5: Cobalamin biosynthesis protein CbiM	TOTAL	0	0	0	0	0	0	0	0	0	0.411979	0	0
B12	CbiM	S	UniRef50_R5ASU5: Cobalamin biosynthesis protein CbiM	unclassified	0	0	0	0	0	0	0	0	0	0.411979	0	0
B12	CobD	S	UniRef50_R5AWX4: Cobalamin biosynthesis protein	TOTAL	0	0	0.644006	0	0	0	0.418385	0	0	0.547054	0	0
B12	CobD	S	UniRef50_R5AWX4: Cobalamin biosynthesis protein	unclassified	0	0	0.644006	0	0	0	0.418385	0	0	0.547054	0	0
B12	CbiP	S	UniRef50_R5BQ39: Cobyric acid synthase	TOTAL	2.58337	2.30906	1.75548	2.07333	0.887098	1.46993	1.66611	2.37562	1.44497	0.53762	0.987471	0.457144
B12	CbiP	S	UniRef50_R5BQ39: Cobyric acid synthase	unclassified	2.58337	2.30906	1.75548	2.07333	0.887098	1.46993	1.66611	2.37562	1.44497	0.53762	0.987471	0.457144
B12	--	D	UniRef50_R5G0G5: Vitamin B12 dependent methionine synthase activation domain	TOTAL	0	0	0	0.934501	0	0	0	0	0.194166	0	0	0
B12	--	D	UniRef50_R5G0G5: Vitamin B12 dependent methionine synthase activation domain	unclassified	0	0	0	0.934501	0	0	0	0	0.194166	0	0	0
B12	--	D	UniRef50_R5GJ69: Vitamin B12 dependent methionine synthase activation domain	TOTAL	0	0	0	0	0	0.243475	0	0	0	0	0	0
B12	--	D	UniRef50_R5GJ69: Vitamin B12 dependent methionine synthase activation domain	unclassified	0	0	0	0	0	0.243475	0	0	0	0	0	0
B12	HemD	S	UniRef50_R5KKY4: Uroporphyrinogen-III synthase	TOTAL	0	0	0	0	3.43841	2.24021	2.24919	3.07365	0	0	0	0
B12	HemD	S	UniRef50_R5KKY4: Uroporphyrinogen-III synthase	unclassified	0	0	0	0	3.43841	2.24021	2.24919	3.07365	0	0	0	0
B12	CobD	S	UniRef50_R5NST1: Cobalamin biosynthesis protein CobD	TOTAL	0	0	0	0	0	0.297828	0	0.429641	0	0	0	0
B12	CobD	S	UniRef50_R5NST1: Cobalamin biosynthesis protein CobD	unclassified	0	0	0	0	0	0.297828	0	0.429641	0	0	0	0
B12	CbiP	S	UniRef50_R5RKD8: Cobyric acid synthase	TOTAL	0.196636	0.597788	0	0	0	0	0	0	0	0	0	0
B12	CbiP	S	UniRef50_R5RKD8: Cobyric acid synthase	unclassified	0.196636	0.597788	0	0	0	0	0	0	0	0	0	0
B12	CobD	S	UniRef50_R5TQY7: Cobalamin biosynthesis protein CobD	TOTAL	0	0	1.50107	0	0	0	0	0	0	0	0	0
B12	CobD	S	UniRef50_R5TQY7: Cobalamin biosynthesis protein CobD	unclassified	0	0	1.50107	0	0	0	0	0	0	0	0	0
B12	CbiP	S	UniRef50_R5VYL7: Cobyric acid synthase	TOTAL	0	0	0	0	0	0.549783	0	0.902528	0	0	0	0
B12	CbiP	S	UniRef50_R5VYL7: Cobyric acid synthase	unclassified	0	0	0	0	0	0.549783	0	0.902528	0	0	0	0
B12	HemE	D	UniRef50_R5XMJ0: Uroporphyrinogen decarboxylase (URO-D)	TOTAL	0	0	1.50843	0	8.23257	5.7127	2.42167	7.67859	1.24844	1.12868	0.986776	1.98933
B12	HemE	D	UniRef50_R5XMJ0: Uroporphyrinogen decarboxylase (URO-D)	unclassified	0	0	1.50843	0	8.23257	5.7127	2.42167	7.67859	1.24844	1.12868	0.986776	1.98933
B12	CbiP	S	UniRef50_R5Y308: Cobyric acid synthase	TOTAL	0	0	0	0	0	0	0	0	0.653041	1.06192	0	0
B12	CbiP	S	UniRef50_R5Y308: Cobyric acid synthase	unclassified	0	0	0	0	0	0	0	0	0.653041	1.06192	0	0
B12	CobO	S	UniRef50_R6EQK2: ATP:cob(I)alamin adenosyltransferase	g__Clostridium.s__Clostridium_sp_ASF502	13.8942	17.866	11.677	2.58255	0	0	0	5.32598	20.5446	3.47375	1.55403	8.30187
B12	CobO	S	UniRef50_R6EQK2: ATP:cob(I)alamin adenosyltransferase	g__Lachnospiraceae_unclassified.s__Lachnospiraceae_bacterium_M18_1	21.1979	30.4866	2.52794	2.0826	0	6.33475	0	3.95704	1.06063	5.95412	0	1.10239
B12	CobO	S	UniRef50_R6EQK2: ATP:cob(I)alamin adenosyltransferase	TOTAL	43.2635	53.726	14.9542	5.15583	3.048	7.12979	5.45436	11.3525	21.6052	9.64806	1.55403	9.40426
B12	CobO	S	UniRef50_R6EQK2: ATP:cob(I)alamin adenosyltransferase	unclassified	8.17139	5.37337	0.749287	0.490683	3.048	0.795047	5.45436	2.06945	0	0.22019	0	0
B12	CbiK	S	UniRef50_R6GA10: Cobalamin biosynthesis protein CbiK Co2+ chelatase	TOTAL	32.0023	13.0564	27.5595	9.85124	0	0	0	0	0	0	0	0
B12	CbiK	S	UniRef50_R6GA10: Cobalamin biosynthesis protein CbiK Co2+ chelatase	unclassified	32.0023	13.0564	27.5595	9.85124	0	0	0	0	0	0	0	0
B12	CbiK	S	UniRef50_R6GHU5: Cobalamin biosynthesis protein CbiK Co2+ chelatase	TOTAL	85.3491	31.7145	79.344	22.432	0	0.268808	0	0	0	0	0	0
B12	CbiK	S	UniRef50_R6GHU5: Cobalamin biosynthesis protein CbiK Co2+ chelatase	unclassified	85.3491	31.7145	79.344	22.432	0	0.268808	0	0	0	0	0	0
B12	--	D	UniRef50_R6JK97: B12 binding domain protein	TOTAL	0	0	0	0	0.944601	0.681359	0.692625	2.06807	0	0	0	0
B12	--	D	UniRef50_R6JK97: B12 binding domain protein	unclassified	0	0	0	0	0.944601	0.681359	0.692625	2.06807	0	0	0	0
B12	CobT	S	UniRef50_R6K120: Nicotinate-nucleotide--dimethylbenzimidazole phosphoribosyltransferase	TOTAL	0	0.202355	0	0	0	0	0	0	0	0	0	0
B12	CobT	S	UniRef50_R6K120: Nicotinate-nucleotide--dimethylbenzimidazole phosphoribosyltransferase	unclassified	0	0.202355	0	0	0	0	0	0	0	0	0	0
B12	CobD	S	UniRef50_R6S5L9: Cobalamin biosynthesis protein CobD	g__Anaerotruncus.s__Anaerotruncus_sp_G3_2012	0.038677	0	0	0.217694	0	0.187352	0	0.0611765	0.0645735	0.167398	0	0
B12	CobD	S	UniRef50_R6S5L9: Cobalamin biosynthesis protein CobD	g__Dorea.s__Dorea_sp_5_2	0.416589	0	0.252794	0.1487	0	0.1352	0	0.251197	0.044197	0	0	0.485759
B12	CobD	S	UniRef50_R6S5L9: Cobalamin biosynthesis protein CobD	g__Lachnospiraceae_unclassified.s__Lachnospiraceae_bacterium_A2	0.450638	0	8.57859	3.2343	0	0	0	0.24796	0.174462	0.226141	0	0
B12	CobD	S	UniRef50_R6S5L9: Cobalamin biosynthesis protein CobD	TOTAL	0.905904	0	8.83139	3.6007	0	0.322553	0	0.560333	0.283232	0.393538	0	0.485759
B12	CobD	S	UniRef50_R7QXV6: Cobalamin biosynthesis protein CobD	TOTAL	3.20654	0	0	0	0	0	0	0	0	0.419332	0.595993	0.256556
B12	CobD	S	UniRef50_R7QXV6: Cobalamin biosynthesis protein CobD	unclassified	3.20654	0	0	0	0	0	0	0	0	0.419332	0.595993	0.256556
B12	CbiD	S	UniRef50_R9L9H1: Cobalamin biosynthesis protein CbiD	g__Anaerotruncus.s__Anaerotruncus_sp_G3_2012	0	0	0	0	0	0	0	0	0	0	0.451786	0
B12	CbiD	S	UniRef50_R9L9H1: Cobalamin biosynthesis protein CbiD	TOTAL	0	0	0	0	0	0	0	0	0	0	0.451786	0
B12	CobS	S	UniRef50_R9L9I5: Cobalamin synthase	g__Anaerotruncus.s__Anaerotruncus_sp_G3_2012	0	0	0	0	0	0	0	0	0.368308	0	0	0
B12	CobS	S	UniRef50_R9L9I5: Cobalamin synthase	TOTAL	0	0	0	0	0	0	0	0	0.368308	0	0	0
B12	HemE	D	UniRef50_R9MZ77: Uroporphyrinogen-III C-methyltransferase	g__Lachnospiraceae_unclassified.s__Lachnospiraceae_bacterium_10_1	0.263086	1.1076	0.815333	0.680263	0	0	0	0	0	0	0	0
B12	HemE	D	UniRef50_R9MZ77: Uroporphyrinogen-III C-methyltransferase	TOTAL	0.263086	1.1076	0.815333	0.680263	0	0	0	0	0	0	0	0
B12	CobK	S	UniRef50_R9NA35: Precorrin-6x reductase	g__Dorea.s__Dorea_sp_5_2	0	0	0	0	0	0.369357	0	0	0	0	0	0.659725
B12	CobK	S	UniRef50_R9NA35: Precorrin-6x reductase	TOTAL	0.869292	0.413919	0	0	0	0.369357	0	0	2.1583	2.37949	1.22661	2.49392
B12	CobK	S	UniRef50_R9NA35: Precorrin-6x reductase	unclassified	0.869292	0.413919	0	0	0	0	0	0	2.1583	2.37949	1.22661	1.83419
B12	CobK	S	UniRef50_S0J982: Precorrin-6x reductase	TOTAL	3.32239	0	0	0.367001	0	0	0	0	0	0.647433	0.601506	0
B12	CobK	S	UniRef50_S0J982: Precorrin-6x reductase	unclassified	3.32239	0	0	0.367001	0	0	0	0	0	0.647433	0.601506	0
B12	CobJ	S	UniRef50_T0Z7D5: Precorrin-3B methylase	TOTAL	0	0	0	0	0	0	0	0	0	0.473358	0	0
B12	CobJ	S	UniRef50_T0Z7D5: Precorrin-3B methylase	unclassified	0	0	0	0	0	0	0	0	0	0.473358	0	0
B12	HemE	D	UniRef50_V2Q1S9: Uroporphyrinogen-III C-methyltransferase	g__Mucispirillum.s__Mucispirillum_schaedleri	0.478506	0	0	0	1.67282	1.58024	0.833816	0.696878	6.27785	9.55519	4.97251	4.95686
B12	HemE	D	UniRef50_V2Q1S9: Uroporphyrinogen-III C-methyltransferase	TOTAL	0.478506	0	0	0	1.67282	1.58024	0.833816	0.696878	6.27785	9.55519	4.97251	4.95686
B12	CbiE	S	UniRef50_V2QEG7: Precorrin-6y C5,15-methyltransferase (Decarboxylating), CbiE subunit	g__Mucispirillum.s__Mucispirillum_schaedleri	1.60543	0.268336	0.490579	0.441742	1.82503	2.21714	2.08335	2.1837	10.2729	16.6739	8.01024	10.872
B12	CbiE	S	UniRef50_V2QEG7: Precorrin-6y C5,15-methyltransferase (Decarboxylating), CbiE subunit	TOTAL	1.60543	0.268336	0.490579	0.441742	1.82503	2.21714	2.08335	2.1837	10.2729	16.6739	8.01024	10.872
B12	CobD	S	UniRef50_V2QI43: Cobalamin biosynthesis protein CobD	g__Mucispirillum.s__Mucispirillum_schaedleri	0.493927	0	0	0	1.18669	1.30695	2.01682	1.50231	5.19679	8.39062	6.48573	5.14591
B12	CobD	S	UniRef50_V2QI43: Cobalamin biosynthesis protein CobD	TOTAL	0.493927	0	0	0	1.18669	1.30695	2.01682	1.50231	5.19679	8.39062	6.48573	5.14591
B12	CobB	S	UniRef50_V2QI46: Cobyrinic acid a,c-diamide synthase	g__Mucispirillum.s__Mucispirillum_schaedleri	0.578239	0	0	0	0.77436	1.20778	0.765403	1.09362	4.16054	6.93589	2.6752	4.56629
B12	CobB	S	UniRef50_V2QI46: Cobyrinic acid a,c-diamide synthase	TOTAL	0.578239	0	0	0	0.77436	1.20778	0.765403	1.09362	4.16054	6.93589	2.6752	4.56629
B12	CobK	S	UniRef50_V2QI49: Precorrin-6x reductase	g__Mucispirillum.s__Mucispirillum_schaedleri	1.51481	0	0	0.802799	1.21334	1.92254	2.17568	1.78666	8.36793	14.0959	9.92185	10.8735
B12	CobK	S	UniRef50_V2QI49: Precorrin-6x reductase	TOTAL	1.51481	0	0	0.802799	1.21334	1.92254	2.17568	1.78666	8.36793	14.0959	9.92185	10.8735
B12	CobF	S	UniRef50_V2QI54: Putative cobalt-precorrin-6A synthase [deacetylating]	g__Mucispirillum.s__Mucispirillum_schaedleri	1.78623	0.426631	0.585038	1.06359	1.49924	1.27474	2.63563	0.780587	12.1019	20.7007	6.96957	11.6377
B12	CobF	S	UniRef50_V2QI54: Putative cobalt-precorrin-6A synthase [deacetylating]	TOTAL	1.78623	0.426631	0.585038	1.06359	1.49924	1.27474	2.63563	0.780587	12.1019	20.7007	6.96957	11.6377
B12	CobT	S	UniRef50_W1U7P3: Nicotinate-nucleotide-dimethylbenzimidazole phosphoribosyltransferase (Fragment)	TOTAL	0	0	0.512194	0	0	0	0	0	0	0	0	0
B12	CobT	S	UniRef50_W1U7P3: Nicotinate-nucleotide-dimethylbenzimidazole phosphoribosyltransferase (Fragment)	unclassified	0	0	0.512194	0	0	0	0	0	0	0	0	0
B12	CobU	S	UniRef50_W4P5F8: Adenosylcobinamide-phosphate guanylyltransferase	TOTAL	0.308461	0.429431	0	0.232209	0.435527	0	0.26722	0.587306	0.2061	0.536669	0.681745	0.61939
B12	CobU	S	UniRef50_W4P5F8: Adenosylcobinamide-phosphate guanylyltransferase	unclassified	0.308461	0.429431	0	0.232209	0.435527	0	0.26722	0.587306	0.2061	0.536669	0.681745	0.61939
B12	CobT	S	UniRef50_W4PTM1: Nicotinate-nucleotide-dimethylbenzimidazole phosphoribosyltransferase	TOTAL	0	0.180358	0.247298	0	0.749799	1.71309	0	0.310588	0	0	0	0
B12	CobT	S	UniRef50_W4PTM1: Nicotinate-nucleotide-dimethylbenzimidazole phosphoribosyltransferase	unclassified	0	0.180358	0.247298	0	0.749799	1.71309	0	0.310588	0	0	0	0

## Sheet: Table S8
Supplementary Table 8: Metatranscriptome mapped by Enzyme Classification (EC) identifiers.
Transcripts mapping to bacterial genes with the specified Enzyme Classification (EC) identifier, expressed as counts per million reads, in cecal contents of specific-pathogen-free (SPF) mice fed an inulin-supplemented (IN), fiber-rich 2 (FR2), or fiber-free (FF) diet.
	Inulin-supplemented				Fiber-rich 2				Fiber-free
EC ID: Name|Contributing taxon	IN2	IN5	IN7	IN8	LD1	LD2	LD3	LD7	MD425	MD426	MD466	MD467
UNMAPPED	551647	543982	567137	575522	565763	563802	609573	563355	498049	524501	482570	477589
UNGROUPED	400679	405613	369840	367699	382143	387123	342121	380929	441217	421060	459598	464229
UNGROUPED|g__Acutalibacter.s__Acutalibacter_muris	2145.4	1969.39	1649.48	3570.45	1581.64	1869.9	0	2260.52	1799.49	1405.94	0	1579.55
UNGROUPED|g__Adlercreutzia.s__Adlercreutzia_equolifaciens	180.484	0	68.6613	153.359	0	148.644	0	109.534	152.015	0	0	212.894
UNGROUPED|g__Akkermansia.s__Akkermansia_muciniphila	0	326.654	2030.3	306.99	1106.01	66.4688	2825.06	0	0	0	0	606.317
UNGROUPED|g__Anaerotruncus.s__Anaerotruncus_sp_G3_2012	714.854	888.151	491.969	1761.17	1734.39	3561.9	879.457	1773.19	2203.53	1167.56	2181.14	489.931
UNGROUPED|g__Asaccharobacter.s__Asaccharobacter_celatus	11.4221	23.5496	46.5462	116.807	32.831	23.0083	0	40.3535	20.6947	16.5504	0	15.8183
UNGROUPED|g__Bacteroides.s__Bacteroides_caecimuris	1310.29	1115.52	1678.04	405.134	1666.75	1354.86	1987.52	1278.48	1858.15	650.4	727.884	1126.71
UNGROUPED|g__Bacteroides.s__Bacteroides_dorei	0	0	0	0	2275.07	815.877	2625.64	0	0	0	0	0
UNGROUPED|g__Bacteroides.s__Bacteroides_uniformis	6578.08	2009.61	1655.22	4630.19	2988.03	1884.16	1849.78	1806.9	2519.54	1421.93	934.283	3283.08
UNGROUPED|g__Clostridium.s__Clostridium_sp_ASF356	10959.2	9190.02	7470.66	0	3392.91	3268.3	4929.83	2404.51	0	1213.29	2362.12	0
UNGROUPED|g__Clostridium.s__Clostridium_sp_ASF502	20049.7	17767	10934.5	4432.38	0	0	0	3875.64	23533.6	10390.6	11459.7	22569.5
UNGROUPED|g__Collinsella.s__Collinsella_aerofaciens	0	15.3793	67.8157	63.6805	29.7569	22.4347	0	0	0	0	0	0
UNGROUPED|g__Collinsella.s__Collinsella_intestinalis	0	0	61.6306	70.4997	0	0	0	0	0	0	0	0
UNGROUPED|g__Collinsella.s__Collinsella_stercoris	0	13.4984	68.1768	76.8221	0	0	0	0	0	0	0	0
UNGROUPED|g__Desulfovibrionaceae_unclassified.s__Desulfovibrionaceae_bacterium	0	0	0	0	0	0	0	0	1506.26	1612.98	2756.84	2569.96
UNGROUPED|g__Dorea.s__Dorea_sp_5_2	10393.4	13049	6347.94	11146.1	4613.3	7804.44	5246.6	5672.45	12822.5	11001.5	12632.4	17945.9
UNGROUPED|g__Enorma.s__Collinsella_massiliensis	0	26.0686	113.478	120.228	0	30.1671	49.9966	24.2249	0	0	0	0
UNGROUPED|g__Enorma.s__Enorma_massiliensis	0	0	77.5613	99.4185	0	0	0	0	0	0	0	0
UNGROUPED|g__Enterorhabdus.s__Enterorhabdus_caecimuris	59.4451	56.3938	320.74	568.02	92.2225	67.5515	62.4617	222.819	161.98	73.3673	57.8486	89.0127
UNGROUPED|g__Eubacterium.s__Eubacterium_plexicaudatum	0	0	0	0	3018.35	5207.96	4814.42	0	0	0	0	0
UNGROUPED|g__Firmicutes_unclassified.s__Firmicutes_bacterium_ASF500	1523.94	1636.34	0	2350.83	2354.7	2957.74	0	2257.38	5888.82	4704.7	3821.33	4050.48
UNGROUPED|g__Lachnospiraceae_unclassified.s__Lachnospiraceae_bacterium_10_1	6639.66	17720.3	10859.2	10433.7	0	0	0	5261.42	0	7874.41	0	0
UNGROUPED|g__Lachnospiraceae_unclassified.s__Lachnospiraceae_bacterium_28_4	0	0	0	0	0	0	0	0	78726.9	7519.27	77426.3	80340.6
UNGROUPED|g__Lachnospiraceae_unclassified.s__Lachnospiraceae_bacterium_3_2	0	0	6649.89	0	0	2440.77	0	5875.71	5751.57	5288.16	6328.95	5957.44
UNGROUPED|g__Lachnospiraceae_unclassified.s__Lachnospiraceae_bacterium_A2	7443	3529.58	22289.4	7965.53	0	0	2284.38	9198.16	10076.3	10141.8	0	0
UNGROUPED|g__Lachnospiraceae_unclassified.s__Lachnospiraceae_bacterium_A4	0	17834.4	0	21418.7	12614.3	18251.9	6780.64	9947.54	11214.6	29894.2	21110.5	13968.4
UNGROUPED|g__Lachnospiraceae_unclassified.s__Lachnospiraceae_bacterium_COE1	0	0	0	0	6806.71	9879.41	5173.45	7380.64	2194.13	3693.01	2962.32	2819.64
UNGROUPED|g__Lachnospiraceae_unclassified.s__Lachnospiraceae_bacterium_M18_1	18182.6	16248	3641.67	3564.67	0	2944.27	0	2434.26	7716.59	10069.8	5627.66	10538.3
UNGROUPED|g__Lactobacillus.s__Lactobacillus_johnsonii	0	683.812	2836.98	8854.93	0	0	0	0	0	0	0	0
UNGROUPED|g__Lactobacillus.s__Lactobacillus_murinus	87.7084	94.8809	0	879.393	0	0	0	0	2305.73	644.515	5665.84	7549.7
UNGROUPED|g__Lactobacillus.s__Lactobacillus_reuteri	0	139.637	595.744	1681.79	254.448	1640.69	2485.69	778.949	148.049	199.799	0	0
UNGROUPED|g__Lactobacillus.s__Lactobacillus_taiwanensis	0	0	0	0	0	3027.23	3829.22	489.639	0	0	1405.08	494.307
UNGROUPED|g__Mucispirillum.s__Mucispirillum_schaedleri	855.181	119.143	153.951	336.829	7054.39	4620.22	5033.19	4301.47	10947.2	18474.9	21112.3	18268.7
UNGROUPED|g__Muribaculaceae_unclassified.s__Muribaculaceae_bacterium_DSM_103720	1448.06	788.527	935.38	956.005	4686.36	5009.37	2822.62	11646.1	1702.67	630.102	348.461	0
UNGROUPED|g__Muribaculum.s__Muribaculum_intestinale	8863.21	8458.57	13488.5	9679.37	9611.26	3616.22	5759.88	6742.37	671.437	493.29	340.172	661.549
UNGROUPED|g__Olsenella.s__Olsenella_profusa	0	0	123.907	147.751	0	0	0	0	0	0	0	0
UNGROUPED|g__Olsenella.s__Olsenella_scatoligenes	0	27.0666	158.633	228.805	0	0	35.5622	0	0	0	0	0
UNGROUPED|g__Oscillibacter.s__Oscillibacter_sp_1_3	0	1909.59	0	0	0	2400.64	0	0	4884.89	4099.27	3893.82	0
UNGROUPED|g__Parabacteroides.s__Parabacteroides_goldsteinii	440.313	907.888	1625.81	904.993	1611.7	520.671	1115.9	385.491	816.721	292.118	0	0
UNGROUPED|g__Prevotella.s__Prevotella_sp_MGM2	542.996	486.552	2080.73	1208.32	0	286.451	0	0	434.573	147.182	486.386	473.654
UNGROUPED|g__Ralstonia.s__Ralstonia_pickettii	9.18327	10.2338	24.5784	0	29.9792	16.5346	12.1006	14.0437	7.18256	13.6585	14.1831	21.9303
UNGROUPED|g__Turicimonas.s__Turicimonas_muris	300.138	1341.65	1415.18	1310.72	3893.41	664.902	2897.17	1130.81	4.73581	4.78327	6.65417	103.64
UNGROUPED|unclassified	301941	287227	269877	268255	310694	302720	278621	293616	251147	287921	275936	268492
1.1.1.1: Alcohol dehydrogenase	37.912	34.1393	38.8643	47.7508	38.3924	45.5717	26.4658	38.8331	63.7971	30.6815	45.8248	57.9592
1.1.1.1: Alcohol dehydrogenase|g__Acutalibacter.s__Acutalibacter_muris	4.08846	4.30233	3.56656	7.87411	4.99648	5.97975	0	5.75098	7.68395	4.23187	0	7.0955
1.1.1.1: Alcohol dehydrogenase|g__Akkermansia.s__Akkermansia_muciniphila	0	0.0305579	0.376338	0.16464	0.440667	0	0.610114	0	0	0	0	0
1.1.1.1: Alcohol dehydrogenase|g__Anaerotruncus.s__Anaerotruncus_sp_G3_2012	0.190093	0.333418	0	1.37458	0.566569	2.42617	0.307684	0.935324	4.80041	1.40176	4.95933	0
1.1.1.1: Alcohol dehydrogenase|g__Bacteroides.s__Bacteroides_dorei	0	0	0	0	0.830669	0.364022	1.0123	0	0	0	0	0
1.1.1.1: Alcohol dehydrogenase|g__Collinsella.s__Collinsella_aerofaciens	0	0.051571	0.362272	0.407999	0.203951	0.0675325	0	0	0	0	0	0
1.1.1.1: Alcohol dehydrogenase|g__Collinsella.s__Collinsella_intestinalis	0	0	1.29046	1.25053	0	0	0	0	0	0	0	0
1.1.1.1: Alcohol dehydrogenase|g__Collinsella.s__Collinsella_stercoris	0	0.180469	2.51895	2.20511	0	0	0	0	0	0	0	0
1.1.1.1: Alcohol dehydrogenase|g__Desulfovibrionaceae_unclassified.s__Desulfovibrionaceae_bacterium	0	0	0	0	0	0	0	0	0.570315	0.600651	0.528716	0.569789
1.1.1.1: Alcohol dehydrogenase|g__Dorea.s__Dorea_sp_5_2	4.43689	12.5002	4.01703	4.26232	7.92976	18.6423	4.6026	10.3241	6.04615	2.10975	6.29264	9.26878
1.1.1.1: Alcohol dehydrogenase|g__Enorma.s__Collinsella_massiliensis	0	0.517476	1.33037	1.56811	0	0.460811	0	0.242416	0	0	0	0
1.1.1.1: Alcohol dehydrogenase|g__Enorma.s__Enorma_massiliensis	0	0	0.628319	0.58244	0	0	0	0	0	0	0	0
1.1.1.1: Alcohol dehydrogenase|g__Lachnospiraceae_unclassified.s__Lachnospiraceae_bacterium_A2	0.51959	0.155389	12.3021	6.00115	0	0	0	5.75806	3.69648	1.67842	0	0
1.1.1.1: Alcohol dehydrogenase|g__Lactobacillus.s__Lactobacillus_murinus	0	0.140917	0	1.77886	0	0	0	0	5.15067	1.56918	9.74271	13.0558
1.1.1.1: Alcohol dehydrogenase|g__Lactobacillus.s__Lactobacillus_reuteri	0	0.303459	0	0.659978	0.0356359	1.37372	0.806176	0.242602	0.137731	0.435495	0	0
1.1.1.1: Alcohol dehydrogenase|g__Muribaculaceae_unclassified.s__Muribaculaceae_bacterium_DSM_103720	0	0.030224	0	0	0.291026	0.332459	0.280152	0.875192	0	0	0	0
1.1.1.1: Alcohol dehydrogenase|g__Muribaculum.s__Muribaculum_intestinale	1.82268	2.45099	2.37976	3.322	1.78615	0.550052	1.33183	0.770211	0	0	0	0
1.1.1.1: Alcohol dehydrogenase|g__Olsenella.s__Olsenella_profusa	0	0	1.08194	0.895921	0	0	0	0	0	0	0	0
1.1.1.1: Alcohol dehydrogenase|g__Prevotella.s__Prevotella_sp_MGM2	0	0	0.290753	0	0	0	0	0	0	0	0	0
1.1.1.1: Alcohol dehydrogenase|g__Turicimonas.s__Turicimonas_muris	0.34363	0.425446	0.770883	0.429529	2.63217	0.524798	3.25014	0.828001	0	0	0	0
1.1.1.1: Alcohol dehydrogenase|unclassified	26.5107	12.7169	7.94851	14.9736	18.6793	14.85	14.2648	13.1063	35.7114	18.6543	24.3014	27.9693
1.1.1.100: 3-oxoacyl-[acyl-carrier-protein] reductase	104.62	67.9553	77.2275	85.3778	174.614	123.924	133.39	198.729	149.486	139.294	185.081	109.693
1.1.1.100: 3-oxoacyl-[acyl-carrier-protein] reductase|g__Acutalibacter.s__Acutalibacter_muris	0.916026	0.825894	0.101368	1.11244	0.550824	0.262185	0	0.554187	0.749948	0.440188	0	0.239782
1.1.1.100: 3-oxoacyl-[acyl-carrier-protein] reductase|g__Akkermansia.s__Akkermansia_muciniphila	0	0.296303	2.70851	0.399056	1.29064	0.103469	2.39444	0	0	0	0	0.413911
1.1.1.100: 3-oxoacyl-[acyl-carrier-protein] reductase|g__Anaerotruncus.s__Anaerotruncus_sp_G3_2012	0.08049	0.199315	0	0.738286	0.137086	0.337928	0	0.424378	1.49305	0.877478	2.65777	0.238702
1.1.1.100: 3-oxoacyl-[acyl-carrier-protein] reductase|g__Bacteroides.s__Bacteroides_caecimuris	1.22304	0.9136	2.70609	0.66353	2.85025	1.81072	3.23947	1.21971	3.46266	1.35562	0.713706	1.18277
1.1.1.100: 3-oxoacyl-[acyl-carrier-protein] reductase|g__Bacteroides.s__Bacteroides_dorei	0	0	0	0	2.58062	0.72387	1.44001	0	0	0	0	0
1.1.1.100: 3-oxoacyl-[acyl-carrier-protein] reductase|g__Bacteroides.s__Bacteroides_uniformis	6.59298	2.17289	1.62505	6.31802	4.99262	2.81947	3.27274	2.52341	3.40169	2.35296	0.845526	2.89799
1.1.1.100: 3-oxoacyl-[acyl-carrier-protein] reductase|g__Clostridium.s__Clostridium_sp_ASF356	0.423556	0	0	0	0	0	0	0	0	0	0	0
1.1.1.100: 3-oxoacyl-[acyl-carrier-protein] reductase|g__Clostridium.s__Clostridium_sp_ASF502	3.10592	0.357607	0.686373	0	0	0	0	0	29.5905	8.71321	25.8011	20.9735
1.1.1.100: 3-oxoacyl-[acyl-carrier-protein] reductase|g__Lachnospiraceae_unclassified.s__Lachnospiraceae_bacterium_10_1	0	0.617412	0.564377	0.415813	0	0	0	0	0	0	0	0
1.1.1.100: 3-oxoacyl-[acyl-carrier-protein] reductase|g__Lachnospiraceae_unclassified.s__Lachnospiraceae_bacterium_A4	0	0.074743	0	1.5768	0	0.991815	0.142124	0.424378	8.06234	31.1897	19.5535	5.57551
1.1.1.100: 3-oxoacyl-[acyl-carrier-protein] reductase|g__Lachnospiraceae_unclassified.s__Lachnospiraceae_bacterium_COE1	0	0	0	0	0.137086	0.756912	0.106593	1.56824	0.0298628	0.103233	0.0328132	0
1.1.1.100: 3-oxoacyl-[acyl-carrier-protein] reductase|g__Lachnospiraceae_unclassified.s__Lachnospiraceae_bacterium_M18_1	4.69825	1.19199	0.0980666	0	0	0	0	0	4.1134	9.18346	7.53325	5.73807
1.1.1.100: 3-oxoacyl-[acyl-carrier-protein] reductase|g__Lactobacillus.s__Lactobacillus_johnsonii	0	0.228343	0	0.786007	0	0	0	0	0	0	0	0
1.1.1.100: 3-oxoacyl-[acyl-carrier-protein] reductase|g__Lactobacillus.s__Lactobacillus_reuteri	0	0	0	0.45947	0	0.713433	0.903257	0.290521	0	0	0	0
1.1.1.100: 3-oxoacyl-[acyl-carrier-protein] reductase|g__Lactobacillus.s__Lactobacillus_taiwanensis	0	0	0	0	0	0	0	0	0	0	0.200492	0
1.1.1.100: 3-oxoacyl-[acyl-carrier-protein] reductase|g__Muribaculaceae_unclassified.s__Muribaculaceae_bacterium_DSM_103720	1.08882	1.16052	2.36789	1.82919	2.92093	3.69566	2.92275	11.5618	2.36667	1.14959	1.04065	0
1.1.1.100: 3-oxoacyl-[acyl-carrier-protein] reductase|g__Muribaculum.s__Muribaculum_intestinale	10.7655	7.74871	15.6682	10.5354	12.659	4.3973	8.83468	10.2543	0.503135	0.409244	0.195121	0.117022
1.1.1.100: 3-oxoacyl-[acyl-carrier-protein] reductase|g__Parabacteroides.s__Parabacteroides_goldsteinii	0.265865	0.24573	0.914121	0.465574	1.49021	0.646684	1.97198	0.588824	0.680712	0.153467	0	0
1.1.1.100: 3-oxoacyl-[acyl-carrier-protein] reductase|g__Prevotella.s__Prevotella_sp_MGM2	1.91447	1.03706	6.90543	4.35425	0	1.42211	0	0	1.47976	0.919529	1.59349	0.85757
1.1.1.100: 3-oxoacyl-[acyl-carrier-protein] reductase|g__Turicimonas.s__Turicimonas_muris	0	0.720723	0	0.615433	0.595429	0.150725	0.342952	0.696348	0	0	0	0
1.1.1.100: 3-oxoacyl-[acyl-carrier-protein] reductase|unclassified	73.5447	50.1645	42.8821	55.1086	144.41	105.092	107.819	168.623	93.552	82.4458	124.914	71.4578
1.1.1.103: L-threonine 3-dehydrogenase	58.7872	34.4138	88.2848	71.5223	32.0492	44.8261	32.9719	62.218	49.1734	23.492	21.9224	21.5726
1.1.1.103: L-threonine 3-dehydrogenase|g__Acutalibacter.s__Acutalibacter_muris	0.840435	0.254493	0.372212	0.662728	0.466764	0.142191	0	0.520158	0.630375	0.544822	0	0.345176
1.1.1.103: L-threonine 3-dehydrogenase|g__Akkermansia.s__Akkermansia_muciniphila	0	0.206766	2.62097	0.232087	1.01774	0.0361015	2.8993	0	0	0	0	0.680206
1.1.1.103: L-threonine 3-dehydrogenase|g__Bacteroides.s__Bacteroides_uniformis	4.09776	1.10196	1.17939	6.45665	2.36701	1.09448	1.48994	1.36045	1.03126	0.827347	0.404696	1.10427
1.1.1.103: L-threonine 3-dehydrogenase|g__Dorea.s__Dorea_sp_5_2	2.19027	2.82243	2.12061	3.55448	1.57248	4.84273	1.58112	5.2403	3.76709	1.21902	1.50566	2.65541
1.1.1.103: L-threonine 3-dehydrogenase|g__Lachnospiraceae_unclassified.s__Lachnospiraceae_bacterium_3_2	0	0	5.6936	0	0	3.9613	0	17.0038	13.7366	4.5267	1.03934	2.71669
1.1.1.103: L-threonine 3-dehydrogenase|unclassified	51.6587	30.0282	76.298	60.6164	26.6252	34.7493	27.0016	38.0933	30.008	16.3741	18.9727	14.0708
1.1.1.122: D-threo-aldose 1-dehydrogenase	0.33059	0	0	0	0	0	0	0	0	0	0	0
1.1.1.122: D-threo-aldose 1-dehydrogenase|unclassified	0.33059	0	0	0	0	0	0	0	0	0	0	0
1.1.1.125: 2-deoxy-D-gluconate 3-dehydrogenase	0.281398	0.653266	0.538858	1.41346	0.509231	1.64682	0.745337	0	0	0	0	0
1.1.1.125: 2-deoxy-D-gluconate 3-dehydrogenase|unclassified	0.281398	0.653266	0.538858	1.41346	0.509231	1.64682	0.745337	0	0	0	0	0
1.1.1.127: 2-dehydro-3-deoxy-D-gluconate 5-dehydrogenase	1.82677	2.51663	3.26401	4.1833	37.0921	37.7384	16.6461	38.6773	5.28202	5.1971	1.5067	3.4874
1.1.1.127: 2-dehydro-3-deoxy-D-gluconate 5-dehydrogenase|g__Lachnospiraceae_unclassified.s__Lachnospiraceae_bacterium_COE1	0	0	0	0	0.42817	0	0	1.83518	0	0	0	0
1.1.1.127: 2-dehydro-3-deoxy-D-gluconate 5-dehydrogenase|unclassified	1.82677	2.51663	3.26401	4.1833	36.6639	37.7384	16.6461	36.8421	5.28202	5.1971	1.5067	3.4874
1.1.1.130: 3-dehydro-L-gulonate 2-dehydrogenase	10.7414	4.51625	0	8.41986	2.40672	1.49237	0	1.22519	0.0829678	0	0	1.56058
1.1.1.130: 3-dehydro-L-gulonate 2-dehydrogenase|unclassified	10.7414	4.51625	0	8.41986	2.40672	1.49237	0	1.22519	0.0829678	0	0	1.56058
1.1.1.131: Mannuronate reductase	9.16623	20.488	2.19812	9.96242	15.6982	24.5753	12.2801	31.6935	5.72256	6.34164	5.2291	6.18101
1.1.1.131: Mannuronate reductase|g__Clostridium.s__Clostridium_sp_ASF502	0.674732	1.09933	0.266619	0.669334	0	0	0	0	0.62152	0.514752	0.397372	1.03496
1.1.1.131: Mannuronate reductase|g__Lachnospiraceae_unclassified.s__Lachnospiraceae_bacterium_M18_1	1.13919	5.35708	0.325867	0.669334	0	0	0	0	0.46614	0.872841	0.0853656	1.3703
1.1.1.131: Mannuronate reductase|unclassified	7.35231	14.0316	1.60563	8.62375	15.6982	24.5753	12.2801	31.6935	4.6349	4.95405	4.74636	3.77574
1.1.1.132: GDP-mannose 6-dehydrogenase	0.358499	0	0	0	3.20277	1.50206	2.14491	3.69725	1.25768	0	0.460367	0
1.1.1.132: GDP-mannose 6-dehydrogenase|unclassified	0.358499	0	0	0	3.20277	1.50206	2.14491	3.69725	1.25768	0	0.460367	0
1.1.1.133: dTDP-4-dehydrorhamnose reductase	87.1275	62.9659	63.4426	55.8738	57.8162	56.4098	64.4178	68.1073	115.254	71.0924	111.598	101.937
1.1.1.133: dTDP-4-dehydrorhamnose reductase|g__Anaerotruncus.s__Anaerotruncus_sp_G3_2012	0.186863	0.151831	0	0.555096	0.477381	0.386286	0.247464	0.517193	0.545962	0.0898732	0.399935	0
1.1.1.133: dTDP-4-dehydrorhamnose reductase|g__Bacteroides.s__Bacteroides_caecimuris	0.591079	0.274438	1.01271	0.22748	0.755018	0.973059	0.510244	0.898968	0.2525	0.306152	0.222393	0.606649
1.1.1.133: dTDP-4-dehydrorhamnose reductase|g__Bacteroides.s__Bacteroides_dorei	0	0	0	0	0.349401	0.222003	0.755624	0	0	0	0	0
1.1.1.133: dTDP-4-dehydrorhamnose reductase|g__Bacteroides.s__Bacteroides_uniformis	2.99462	1.60077	0.712894	3.13067	2.14495	0.958286	1.31759	0.724706	1.41565	0.825879	0.392244	1.55393
1.1.1.133: dTDP-4-dehydrorhamnose reductase|g__Clostridium.s__Clostridium_sp_ASF502	14.6699	8.90887	7.86794	0.869647	0	0	0	1.83053	26.1948	5.13658	8.27386	12.7198
1.1.1.133: dTDP-4-dehydrorhamnose reductase|g__Desulfovibrionaceae_unclassified.s__Desulfovibrionaceae_bacterium	0	0	0	0	0	0	0	0	0.239305	0	0.815268	0.28696
1.1.1.133: dTDP-4-dehydrorhamnose reductase|g__Dorea.s__Dorea_sp_5_2	0.329758	1.20572	0.183661	0.51551	0	0.74183	0	1.95592	0.344068	0.376178	0.579738	1.65024
1.1.1.133: dTDP-4-dehydrorhamnose reductase|g__Enorma.s__Collinsella_massiliensis	0	0	0	0	0	0.00948329	0	0	0	0	0	0
1.1.1.133: dTDP-4-dehydrorhamnose reductase|g__Enorma.s__Enorma_massiliensis	0	0	0	0.0122533	0	0	0	0	0	0	0	0
1.1.1.133: dTDP-4-dehydrorhamnose reductase|g__Eubacterium.s__Eubacterium_plexicaudatum	0	0	0	0	0.653835	0.181072	0.43137	0	0	0	0	0
1.1.1.133: dTDP-4-dehydrorhamnose reductase|g__Firmicutes_unclassified.s__Firmicutes_bacterium_ASF500	0	0	0	0.534667	0	0.272142	0	0	0.489337	0.200201	0	0.348003
1.1.1.133: dTDP-4-dehydrorhamnose reductase|g__Lachnospiraceae_unclassified.s__Lachnospiraceae_bacterium_10_1	1.19122	5.83115	4.3121	2.51228	0	0	0	1.62547	0	0.112341	0	0
1.1.1.133: dTDP-4-dehydrorhamnose reductase|g__Lachnospiraceae_unclassified.s__Lachnospiraceae_bacterium_28_4	0	0	0	0	0	0	0	0	31.7081	0.749231	36.9301	33.3895
1.1.1.133: dTDP-4-dehydrorhamnose reductase|g__Lachnospiraceae_unclassified.s__Lachnospiraceae_bacterium_A2	0.62934	0.208716	11.5871	2.33335	0	0	0.148828	3.23347	3.57509	1.75126	0	0
1.1.1.133: dTDP-4-dehydrorhamnose reductase|g__Lachnospiraceae_unclassified.s__Lachnospiraceae_bacterium_A4	0	0.228725	0	2.71648	0.11441	1.1134	0.207576	0.714649	4.04025	11.3369	5.96295	4.17284
1.1.1.133: dTDP-4-dehydrorhamnose reductase|g__Lachnospiraceae_unclassified.s__Lachnospiraceae_bacterium_COE1	0	0	0	0	0.291504	0.235258	0.0906656	1.00976	0.116761	0.0439036	0.0279101	0.0219701
1.1.1.133: dTDP-4-dehydrorhamnose reductase|g__Lachnospiraceae_unclassified.s__Lachnospiraceae_bacterium_M18_1	3.31144	0.469786	0.292812	0.287644	0	0.201346	0	0.290955	1.07506	2.69877	1.06874	1.66158
1.1.1.133: dTDP-4-dehydrorhamnose reductase|g__Lactobacillus.s__Lactobacillus_johnsonii	0	0.0363881	0.374202	2.4446	0	0	0	0	0	0	0	0
1.1.1.133: dTDP-4-dehydrorhamnose reductase|g__Lactobacillus.s__Lactobacillus_taiwanensis	0	0	0	0	0	0.0381203	0	0	0	0	0	0
1.1.1.133: dTDP-4-dehydrorhamnose reductase|g__Mucispirillum.s__Mucispirillum_schaedleri	0.182612	0.21273	0.0291685	0.171923	2.60258	1.71533	1.57508	2.06537	4.12867	7.77708	8.03875	6.13834
1.1.1.133: dTDP-4-dehydrorhamnose reductase|g__Muribaculaceae_unclassified.s__Muribaculaceae_bacterium_DSM_103720	0.363683	0	0	0	1.53908	1.81345	1.02358	2.33582	0	0	0	0
1.1.1.133: dTDP-4-dehydrorhamnose reductase|g__Muribaculum.s__Muribaculum_intestinale	1.92424	3.32277	3.37339	3.00155	2.34205	0.572764	0.9886	0.716349	0.10083	0	0	0
1.1.1.133: dTDP-4-dehydrorhamnose reductase|g__Oscillibacter.s__Oscillibacter_sp_1_3	0	0	0	0	0	0.00942161	0	0	0.129357	0.121115	0	0
1.1.1.133: dTDP-4-dehydrorhamnose reductase|g__Parabacteroides.s__Parabacteroides_goldsteinii	0.0220602	0.481792	0.629948	0.0545852	0.635311	0.221156	0.747311	0	0.90262	0.30356	0	0
1.1.1.133: dTDP-4-dehydrorhamnose reductase|g__Prevotella.s__Prevotella_sp_MGM2	0.183269	0	0.78718	0.657085	0	0	0	0	0.0509965	0	0.168105	0
1.1.1.133: dTDP-4-dehydrorhamnose reductase|unclassified	60.5475	40.0322	32.2795	35.849	45.9107	46.7454	56.3738	50.1881	39.945	39.2635	48.7174	39.3867
1.1.1.136: UDP-N-acetylglucosamine 6-dehydrogenase	14.5622	0	0	2.84446	0	0	0	0	0	0.28875	0	0
1.1.1.136: UDP-N-acetylglucosamine 6-dehydrogenase|g__Bacteroides.s__Bacteroides_uniformis	4.20247	0	0	2.76552	0	0	0	0	0	0.28875	0	0
1.1.1.136: UDP-N-acetylglucosamine 6-dehydrogenase|g__Parabacteroides.s__Parabacteroides_goldsteinii	0.0157573	0	0	0.0789403	0	0	0	0	0	0	0	0
1.1.1.136: UDP-N-acetylglucosamine 6-dehydrogenase|unclassified	10.344	0	0	0	0	0	0	0	0	0	0	0
1.1.1.137: Ribitol-5-phosphate 2-dehydrogenase	0	1.60341	0	0	0	0	0	0	0	0	0	0
1.1.1.137: Ribitol-5-phosphate 2-dehydrogenase|unclassified	0	1.60341	0	0	0	0	0	0	0	0	0	0
1.1.1.14: L-iditol 2-dehydrogenase	6.52873	4.79719	22.2042	15.413	5.08813	8.81063	6.17336	12.9483	5.26484	3.00556	3.22558	7.65538
1.1.1.14: L-iditol 2-dehydrogenase|g__Acutalibacter.s__Acutalibacter_muris	0.826736	0.418622	0.215314	0.963562	0	0	0	0.742383	0	0	0	0
1.1.1.14: L-iditol 2-dehydrogenase|g__Anaerotruncus.s__Anaerotruncus_sp_G3_2012	0	0	0	0.227828	0	0.194879	0	0	0	0	0	0
1.1.1.14: L-iditol 2-dehydrogenase|g__Dorea.s__Dorea_sp_5_2	2.1971	2.19072	6.31467	0.878026	1.50226	6.31398	5.07421	10.0365	2.46914	0.984145	1.01175	5.53002
1.1.1.14: L-iditol 2-dehydrogenase|g__Lachnospiraceae_unclassified.s__Lachnospiraceae_bacterium_10_1	0.0375789	0.244271	0.430602	0.422518	0	0	0	0	0	0	0	0
1.1.1.14: L-iditol 2-dehydrogenase|unclassified	3.46731	1.94358	15.2436	12.921	3.58587	2.30177	1.09915	2.16943	2.7957	2.02141	2.21383	2.12536
1.1.1.140: Sorbitol-6-phosphate 2-dehydrogenase	0	0.358538	0	2.50807	3.20443	0	3.7733	0.869421	6.60482	9.52651	28.7692	10.4229
1.1.1.140: Sorbitol-6-phosphate 2-dehydrogenase|g__Clostridium.s__Clostridium_sp_ASF356	0	0	0	0	2.07708	0	1.89967	0.264853	0	5.75131	19.16	0
1.1.1.140: Sorbitol-6-phosphate 2-dehydrogenase|unclassified	0	0.358538	0	2.50807	1.12735	0	1.87363	0.604568	6.60482	3.7752	9.60925	10.4229
1.1.1.154: Ureidoglycolate dehydrogenase	2.24673	4.64743	3.788	13.4794	5.43605	12.7229	6.43319	9.6771	1.24052	0.984176	0	1.34101
1.1.1.154: Ureidoglycolate dehydrogenase|g__Dorea.s__Dorea_sp_5_2	2.24673	4.64743	3.788	13.4794	5.43605	12.7229	6.43319	9.6771	1.24052	0.984176	0	1.34101
1.1.1.157: 3-hydroxybutyryl-CoA dehydrogenase	76.4955	178.107	433.408	271.312	248.448	286.914	239.384	179.824	269.652	181.889	227.884	238.301
1.1.1.157: 3-hydroxybutyryl-CoA dehydrogenase|g__Lachnospiraceae_unclassified.s__Lachnospiraceae_bacterium_28_4	0	0	0	0	0	0	0	0	128.928	8.53601	93.0052	117.422
1.1.1.157: 3-hydroxybutyryl-CoA dehydrogenase|g__Oscillibacter.s__Oscillibacter_sp_1_3	0	5.89941	0	0	0	9.3961	0	0	13.6998	9.96649	7.02562	0
1.1.1.157: 3-hydroxybutyryl-CoA dehydrogenase|unclassified	76.4955	172.207	433.408	271.312	248.448	277.518	239.384	179.824	127.024	163.386	127.853	120.879
1.1.1.169: 2-dehydropantoate 2-reductase	16.3193	11.0781	29.9766	33.0767	11.7624	11.4408	10.9637	8.84705	5.07016	4.45936	1.18378	4.89556
1.1.1.169: 2-dehydropantoate 2-reductase|g__Bacteroides.s__Bacteroides_caecimuris	0.868617	0.728256	0.834587	0.0530247	1.29849	0.412405	0.842125	0.637019	1.15604	0.489345	0.621535	0.754305
1.1.1.169: 2-dehydropantoate 2-reductase|g__Bacteroides.s__Bacteroides_dorei	0	0	0	0	0.0545395	0.0830723	0.226176	0	0	0	0	0
1.1.1.169: 2-dehydropantoate 2-reductase|g__Bacteroides.s__Bacteroides_uniformis	1.30953	0.176521	0.161358	0.660459	0.215837	0.22512	0.251742	0.0334084	0.399653	0.101585	0	0.399318
1.1.1.169: 2-dehydropantoate 2-reductase|g__Parabacteroides.s__Parabacteroides_goldsteinii	0	0.269568	0.396742	0	0.266023	0	0	0	0.278163	0	0	0
1.1.1.169: 2-dehydropantoate 2-reductase|g__Turicimonas.s__Turicimonas_muris	0.358571	0	0	0.199303	0.610668	0	0	0	0	0	0	0
1.1.1.169: 2-dehydropantoate 2-reductase|unclassified	13.7826	9.90379	28.5839	32.1639	9.31685	10.7202	9.64369	8.17662	3.23631	3.86843	0.562241	3.74194
1.1.1.17: Mannitol-1-phosphate 5-dehydrogenase	3.99361	5.43618	4.20261	5.75848	10.0779	51.6621	51.869	25.2593	7.02161	7.23777	5.52207	2.52341
1.1.1.17: Mannitol-1-phosphate 5-dehydrogenase|g__Clostridium.s__Clostridium_sp_ASF356	2.61168	0.432577	0.65668	0	0.233773	6.76343	26.4315	0	0	0.592132	0.590088	0
1.1.1.17: Mannitol-1-phosphate 5-dehydrogenase|g__Firmicutes_unclassified.s__Firmicutes_bacterium_ASF500	0.115176	0.0305579	0	0	0.0630519	0.24008	0	0	0.531096	0.61717	0.080492	0
1.1.1.17: Mannitol-1-phosphate 5-dehydrogenase|g__Lactobacillus.s__Lactobacillus_murinus	0	0	0	0	0	0	0	0	0	0	0	0.166525
1.1.1.17: Mannitol-1-phosphate 5-dehydrogenase|g__Oscillibacter.s__Oscillibacter_sp_1_3	0	0	0	0	0	0	0	0	1.69923	1.34059	1.37925	0
1.1.1.17: Mannitol-1-phosphate 5-dehydrogenase|unclassified	1.26676	4.97304	3.54593	5.75848	9.78109	44.6586	25.4375	25.2593	4.79128	4.68788	3.47223	2.35689
1.1.1.176: 12-alpha-hydroxysteroid dehydrogenase	1.93722	0	0	0	0.707787	1.62964	0	1.31806	1.2529	0.528869	1.35534	1.53817
1.1.1.176: 12-alpha-hydroxysteroid dehydrogenase|unclassified	1.93722	0	0	0	0.707787	1.62964	0	1.31806	1.2529	0.528869	1.35534	1.53817
1.1.1.18: Inositol 2-dehydrogenase	6.92429	7.25737	8.45926	8.93132	6.96747	17.0562	8.28228	12.7318	39.8659	28.7514	19.6685	42.4744
1.1.1.18: Inositol 2-dehydrogenase|g__Acutalibacter.s__Acutalibacter_muris	0.704188	0.285673	0.448305	0.824711	0.131177	0.328132	0	0.510507	0	0	0	0
1.1.1.18: Inositol 2-dehydrogenase|g__Anaerotruncus.s__Anaerotruncus_sp_G3_2012	0	0	0	0.446999	0	1.14176	0	0.376847	0.435656	0.327395	0	0
1.1.1.18: Inositol 2-dehydrogenase|g__Bacteroides.s__Bacteroides_caecimuris	0.31399	0	0	0	0	0	0	0	0	0	0	0
1.1.1.18: Inositol 2-dehydrogenase|g__Clostridium.s__Clostridium_sp_ASF502	0.399621	0.0353418	0.242295	0.0714055	0	0	0	0	3.91726	4.33842	1.0473	5.22514
1.1.1.18: Inositol 2-dehydrogenase|g__Dorea.s__Dorea_sp_5_2	1.58805	4.00563	1.97359	3.55129	2.27546	10.3635	2.20032	5.26254	16.6495	4.72921	2.69591	21.0487
1.1.1.18: Inositol 2-dehydrogenase|g__Lachnospiraceae_unclassified.s__Lachnospiraceae_bacterium_10_1	0	0	0	0	0	0	0	0.0282918	0	0	0	0
1.1.1.18: Inositol 2-dehydrogenase|g__Lachnospiraceae_unclassified.s__Lachnospiraceae_bacterium_3_2	0	0	0	0	0	0.0522008	0	0.424378	0	0.687526	0.699501	0.914156
1.1.1.18: Inositol 2-dehydrogenase|g__Lachnospiraceae_unclassified.s__Lachnospiraceae_bacterium_A4	0	0	0	0	0	0	0	0.0282918	0	0	0.0218755	0
1.1.1.18: Inositol 2-dehydrogenase|g__Lachnospiraceae_unclassified.s__Lachnospiraceae_bacterium_M18_1	0.018969	0	0	0.023726	0	0.202946	0	0.148855	5.86816	14.5357	2.96949	10.7149
1.1.1.18: Inositol 2-dehydrogenase|g__Oscillibacter.s__Oscillibacter_sp_1_3	0	0	0	0	0	0	0	0	0.0633396	0	0	0
1.1.1.18: Inositol 2-dehydrogenase|g__Parabacteroides.s__Parabacteroides_goldsteinii	0.498874	1.0231	2.44455	1.03996	1.08134	0.352939	1.12111	0.525406	0.806532	0	0	0
1.1.1.18: Inositol 2-dehydrogenase|unclassified	3.4006	1.90763	3.35052	2.97323	3.47949	4.61472	4.96085	5.42668	12.1254	4.13314	12.2344	4.57151
1.1.1.193: 5-amino-6-(5-phosphoribosylamino)uracil reductase	6.9064	7.00263	8.76422	8.63672	7.5046	3.90562	3.4463	4.34959	10.3423	16.7899	16.7635	7.28099
1.1.1.193: 5-amino-6-(5-phosphoribosylamino)uracil reductase|g__Bacteroides.s__Bacteroides_caecimuris	0.0546446	0	0.0927684	0	0	0	0	0	0.0810953	0	0	0.101284
1.1.1.193: 5-amino-6-(5-phosphoribosylamino)uracil reductase|g__Bacteroides.s__Bacteroides_dorei	0	0	0	0	0.0919427	0.122538	0	0	0	0	0	0
1.1.1.193: 5-amino-6-(5-phosphoribosylamino)uracil reductase|g__Bacteroides.s__Bacteroides_uniformis	0.327867	0.422858	0.208729	0.569547	0.186135	0.0531586	0	0	0.323937	0	0	0.121541
1.1.1.193: 5-amino-6-(5-phosphoribosylamino)uracil reductase|g__Clostridium.s__Clostridium_sp_ASF356	0.954918	0.854517	0.641176	0	0.753832	0	0	0	0	0.0167038	0	0
1.1.1.193: 5-amino-6-(5-phosphoribosylamino)uracil reductase|g__Clostridium.s__Clostridium_sp_ASF502	0.0667581	0.155744	0.170903	0	0	0	0	0	0.298796	0.161168	0.0820792	0.410501
1.1.1.193: 5-amino-6-(5-phosphoribosylamino)uracil reductase|g__Desulfovibrionaceae_unclassified.s__Desulfovibrionaceae_bacterium	0	0	0	0	0	0	0	0	0.662937	0.525197	1.39349	0.827981
1.1.1.193: 5-amino-6-(5-phosphoribosylamino)uracil reductase|g__Eubacterium.s__Eubacterium_plexicaudatum	0	0	0	0	0.0439784	0	0	0	0	0	0	0
1.1.1.193: 5-amino-6-(5-phosphoribosylamino)uracil reductase|g__Lachnospiraceae_unclassified.s__Lachnospiraceae_bacterium_A2	0.262322	0.659121	4.67489	2.91406	0	0	0.469969	0.951881	0.806791	0.608578	0	0
1.1.1.193: 5-amino-6-(5-phosphoribosylamino)uracil reductase|g__Lachnospiraceae_unclassified.s__Lachnospiraceae_bacterium_A4	0	0.0643138	0	1.38522	0.176936	0	0	0	1.63782	5.87798	3.30351	0.770231
1.1.1.193: 5-amino-6-(5-phosphoribosylamino)uracil reductase|g__Mucispirillum.s__Mucispirillum_schaedleri	0.273851	0	0	0	2.03217	1.41474	1.65462	1.19108	2.19038	5.28404	7.13755	4.09098
1.1.1.193: 5-amino-6-(5-phosphoribosylamino)uracil reductase|g__Muribaculaceae_unclassified.s__Muribaculaceae_bacterium_DSM_103720	0.0401095	0.0744914	0	0	0.460654	0.50629	0.212469	1.52258	0.379444	0.270074	0	0
1.1.1.193: 5-amino-6-(5-phosphoribosylamino)uracil reductase|g__Muribaculum.s__Muribaculum_intestinale	0.707652	0.839688	1.07595	1.25327	0.954143	0.114738	0.442527	0.684046	0	0.0567269	0	0
1.1.1.193: 5-amino-6-(5-phosphoribosylamino)uracil reductase|g__Parabacteroides.s__Parabacteroides_goldsteinii	0	0.33623	0.391869	0.249087	0.231231	0.19373	0	0	0.0806024	0	0	0
1.1.1.193: 5-amino-6-(5-phosphoribosylamino)uracil reductase|unclassified	4.21828	3.59566	1.50793	2.26554	2.57357	1.50042	0.666714	0	3.88054	3.9894	4.84684	0.958472
1.1.1.202: 1,3-propanediol dehydrogenase	1.292	0.227237	0	0.525024	0	0.238322	0	0	0.622966	0.336037	0	0.739718
1.1.1.202: 1,3-propanediol dehydrogenase|unclassified	1.292	0.227237	0	0.525024	0	0.238322	0	0	0.622966	0.336037	0	0.739718
1.1.1.205: IMP dehydrogenase	424.483	569.432	567.254	514.117	444.323	418.612	372.668	423.733	388.089	504.539	382.307	455.89
1.1.1.205: IMP dehydrogenase|g__Acutalibacter.s__Acutalibacter_muris	0.89036	0.94522	0.453721	1.71918	0.390167	0.0371429	0	0.764968	0.127491	0.30558	0	0.0566153
1.1.1.205: IMP dehydrogenase|g__Adlercreutzia.s__Adlercreutzia_equolifaciens	0	0	0.110357	0.030977	0	0.0240927	0	0.05876	0.0137828	0	0	0.0137713
1.1.1.205: IMP dehydrogenase|g__Akkermansia.s__Akkermansia_muciniphila	0	0.337402	1.78432	0.470417	1.50831	0.0757424	3.38538	0	0	0	0	1.01019
1.1.1.205: IMP dehydrogenase|g__Anaerotruncus.s__Anaerotruncus_sp_G3_2012	0.101599	0.259441	0	0.396931	0.486577	0.592178	0.23546	0.501735	0.565409	0.219892	1.18021	0.0282473
1.1.1.205: IMP dehydrogenase|g__Asaccharobacter.s__Asaccharobacter_celatus	0.0247661	0.103092	0.0630671	0.0617215	0.0632703	0.0120463	0	0.0391733	0.0964798	0.0357344	0	0.179027
1.1.1.205: IMP dehydrogenase|g__Bacteroides.s__Bacteroides_caecimuris	1.28522	1.73695	2.88386	0.38205	1.91786	2.14163	2.00482	1.61012	2.26638	0.428259	0.498099	0.693368
1.1.1.205: IMP dehydrogenase|g__Bacteroides.s__Bacteroides_dorei	0	0	0	0	1.75889	0.868514	2.41515	0	0	0	0	0
1.1.1.205: IMP dehydrogenase|g__Bacteroides.s__Bacteroides_uniformis	5.36907	2.38022	1.78576	7.86305	2.73666	1.91075	1.53653	1.89615	3.10828	1.74211	0.701935	3.43136
1.1.1.205: IMP dehydrogenase|g__Clostridium.s__Clostridium_sp_ASF356	3.94104	3.57834	1.5355	0	0.619341	0.653202	0.82336	0.510894	0	0.382676	0.532273	0
1.1.1.205: IMP dehydrogenase|g__Clostridium.s__Clostridium_sp_ASF502	7.60971	5.3895	3.73569	1.44226	0	0	0	1.46771	4.78647	2.68962	2.56037	6.35661
1.1.1.205: IMP dehydrogenase|g__Collinsella.s__Collinsella_aerofaciens	0	0	0	0	0.0158836	0	0	0	0	0	0	0
1.1.1.205: IMP dehydrogenase|g__Collinsella.s__Collinsella_intestinalis	0	0	0.0633304	0.38883	0	0	0	0	0	0	0	0
1.1.1.205: IMP dehydrogenase|g__Collinsella.s__Collinsella_stercoris	0	0.138563	0.522476	0.466596	0	0	0	0	0	0	0	0
1.1.1.205: IMP dehydrogenase|g__Desulfovibrionaceae_unclassified.s__Desulfovibrionaceae_bacterium	0	0	0	0	0	0	0	0	1.02104	1.03089	1.56435	1.46564
1.1.1.205: IMP dehydrogenase|g__Dorea.s__Dorea_sp_5_2	1.46285	2.75179	2.88496	1.9916	2.52921	4.69791	1.62904	3.82874	7.78173	6.46307	4.75027	13.073
1.1.1.205: IMP dehydrogenase|g__Enorma.s__Collinsella_massiliensis	0	0.0460915	0.284393	0.294906	0	0.0724286	0.0657325	0.0588824	0	0	0	0
1.1.1.205: IMP dehydrogenase|g__Enterorhabdus.s__Enterorhabdus_caecimuris	0.0741443	0.240977	0.581978	1.05066	0.410404	0.120205	0.13092	0.273658	0.275085	0.047547	0.0906788	0.412272
1.1.1.205: IMP dehydrogenase|g__Eubacterium.s__Eubacterium_plexicaudatum	0	0	0	0	0.810172	0.667494	0.891676	0	0	0	0	0
1.1.1.205: IMP dehydrogenase|g__Firmicutes_unclassified.s__Firmicutes_bacterium_ASF500	0.982081	1.21989	0	1.38768	2.28047	2.32	0	1.55334	6.06148	4.8814	2.07451	2.68077
1.1.1.205: IMP dehydrogenase|g__Lachnospiraceae_unclassified.s__Lachnospiraceae_bacterium_10_1	2.13643	8.34398	4.99339	6.65588	0	0	0	2.37523	0	0.983575	0	0
1.1.1.205: IMP dehydrogenase|g__Lachnospiraceae_unclassified.s__Lachnospiraceae_bacterium_28_4	0	0	0	0	0	0	0	0	37.2207	2.27862	38.8878	45.0214
1.1.1.205: IMP dehydrogenase|g__Lachnospiraceae_unclassified.s__Lachnospiraceae_bacterium_3_2	0	0	3.03308	0	0	0.377888	0	1.86282	0.951195	0.822038	1.53485	1.23814
1.1.1.205: IMP dehydrogenase|g__Lachnospiraceae_unclassified.s__Lachnospiraceae_bacterium_A2	1.13892	0.275721	11.2908	3.78905	0	0	0.240054	5.59045	3.96324	4.66984	0	0
1.1.1.205: IMP dehydrogenase|g__Lachnospiraceae_unclassified.s__Lachnospiraceae_bacterium_A4	0	11.9023	0	13.9754	6.28313	8.79094	1.26869	4.60733	7.50652	23.7241	12.5864	7.32902
1.1.1.205: IMP dehydrogenase|g__Lachnospiraceae_unclassified.s__Lachnospiraceae_bacterium_COE1	0	0	0	0	0.37964	0.578998	0.120033	1.88372	0.0576482	0.249105	0.411734	0.676757
1.1.1.205: IMP dehydrogenase|g__Lachnospiraceae_unclassified.s__Lachnospiraceae_bacterium_M18_1	9.40333	7.59047	2.87348	2.00546	0	1.6102	0	0.912339	2.45639	4.54674	1.48645	3.44355
1.1.1.205: IMP dehydrogenase|g__Lactobacillus.s__Lactobacillus_johnsonii	0	0	0.315973	0.703196	0	0	0	0	0	0	0	0
1.1.1.205: IMP dehydrogenase|g__Lactobacillus.s__Lactobacillus_murinus	0	0	0	0.0316347	0	0	0	0	0.225207	0.304092	0.433051	1.06882
1.1.1.205: IMP dehydrogenase|g__Lactobacillus.s__Lactobacillus_reuteri	0	0	0.222268	1.07711	0	0	0	0	0	0	0	0
1.1.1.205: IMP dehydrogenase|g__Mucispirillum.s__Mucispirillum_schaedleri	1.01364	0.117681	0.161358	0.332815	5.84229	4.16622	3.35575	2.60583	8.17877	11.7365	15.1718	15.2452
1.1.1.205: IMP dehydrogenase|g__Muribaculaceae_unclassified.s__Muribaculaceae_bacterium_DSM_103720	0.712705	0.389864	0.61578	0.827764	2.21034	3.0079	1.41539	7.30508	1.42974	0.575381	0	0
1.1.1.205: IMP dehydrogenase|g__Muribaculum.s__Muribaculum_intestinale	7.55589	7.53439	11.5929	10.4509	7.4596	3.16251	5.83496	3.69603	0.352991	0.48852	0.170853	0.126954
1.1.1.205: IMP dehydrogenase|g__Olsenella.s__Olsenella_profusa	0	0	0.0944858	0.0620831	0	0	0	0	0	0	0	0
1.1.1.205: IMP dehydrogenase|g__Olsenella.s__Olsenella_scatoligenes	0	0.0229979	0.0315336	0.0464763	0	0	0.0327979	0	0	0	0	0
1.1.1.205: IMP dehydrogenase|g__Oscillibacter.s__Oscillibacter_sp_1_3	0	0.992901	0	0	0	0.737828	0	0	3.70896	3.36103	4.24217	0
1.1.1.205: IMP dehydrogenase|g__Parabacteroides.s__Parabacteroides_goldsteinii	0.34388	1.03773	2.18797	1.01579	1.89549	0.495189	1.51295	0.0801836	0.932467	0.341403	0	0
1.1.1.205: IMP dehydrogenase|g__Prevotella.s__Prevotella_sp_MGM2	0.291824	0.424545	1.97273	1.47713	0	0.148264	0	0	0.423779	0.0977299	0.341705	0.494327
1.1.1.205: IMP dehydrogenase|g__Ralstonia.s__Ralstonia_pickettii	0.0900514	0	0	0	0.0164325	0.0250293	0	0.0203481	0	0.0618727	0.0314667	0.271827
1.1.1.205: IMP dehydrogenase|g__Turicimonas.s__Turicimonas_muris	0.821543	2.88402	1.94335	3.29068	4.44321	1.31115	1.78439	2.27358	0.0285756	0.0738264	0	0.442551
1.1.1.205: IMP dehydrogenase|unclassified	379.234	508.788	509.235	450.429	400.266	380.007	343.985	377.956	294.549	431.998	293.056	351.13
1.1.1.218: Morphine 6-dehydrogenase	0.890672	0.298018	0	0	0.539842	0.467892	0.869327	0.253852	0	0	0	0
1.1.1.218: Morphine 6-dehydrogenase|unclassified	0.890672	0.298018	0	0	0.539842	0.467892	0.869327	0.253852	0	0	0	0
1.1.1.22: UDP-glucose 6-dehydrogenase	92.0421	50.907	42.9582	44.6453	58.7815	43.7831	42.4792	52.8493	48.5745	68.8716	55.5713	56.9963
1.1.1.22: UDP-glucose 6-dehydrogenase|g__Anaerotruncus.s__Anaerotruncus_sp_G3_2012	0	0	0	0	0	0.657084	0	0	0	0	0	0
1.1.1.22: UDP-glucose 6-dehydrogenase|g__Bacteroides.s__Bacteroides_caecimuris	0.432658	0.0669611	0.0550883	0.0180387	0.110428	0.0701488	0.0572971	0.182474	0.224435	0.110981	0.0352762	0.208503
1.1.1.22: UDP-glucose 6-dehydrogenase|g__Bacteroides.s__Bacteroides_dorei	0	0	0	0	0.846985	0.140298	0.553333	0	0	0	0	0
1.1.1.22: UDP-glucose 6-dehydrogenase|g__Bacteroides.s__Bacteroides_uniformis	0.951847	0.949619	0.309996	1.35358	0.328815	0.322605	0.0572971	0.228116	0.256835	0.36069	0.0352762	0.352787
1.1.1.22: UDP-glucose 6-dehydrogenase|g__Clostridium.s__Clostridium_sp_ASF502	1.42766	0	0.820929	0	0	0	0	0	6.61165	2.3034	3.41528	9.71166
1.1.1.22: UDP-glucose 6-dehydrogenase|g__Collinsella.s__Collinsella_aerofaciens	0	0.028005	0.0383991	0.0943035	0.153693	0.117353	0	0	0	0	0	0
1.1.1.22: UDP-glucose 6-dehydrogenase|g__Desulfovibrionaceae_unclassified.s__Desulfovibrionaceae_bacterium	0	0	0	0	0	0	0	0	1.45078	1.31227	1.18005	2.40538
1.1.1.22: UDP-glucose 6-dehydrogenase|g__Enorma.s__Enorma_massiliensis	0	0	0.135081	0.0568701	0	0	0	0	0	0	0	0
1.1.1.22: UDP-glucose 6-dehydrogenase|g__Eubacterium.s__Eubacterium_plexicaudatum	0	0	0	0	0	0	0.591116	0	0	0	0	0
1.1.1.22: UDP-glucose 6-dehydrogenase|g__Lachnospiraceae_unclassified.s__Lachnospiraceae_bacterium_3_2	0	0	0	0	0	0	0	1.17444	0	0	0	0
1.1.1.22: UDP-glucose 6-dehydrogenase|g__Lachnospiraceae_unclassified.s__Lachnospiraceae_bacterium_A4	0	0	0	2.96675	0	1.14611	0	0.439977	4.67971	17.8761	9.86173	4.69347
1.1.1.22: UDP-glucose 6-dehydrogenase|g__Lachnospiraceae_unclassified.s__Lachnospiraceae_bacterium_COE1	0	0	0	0	0	0.0318368	0	0.672942	0.0728521	0.0472205	0.120056	0.0363955
1.1.1.22: UDP-glucose 6-dehydrogenase|g__Lachnospiraceae_unclassified.s__Lachnospiraceae_bacterium_M18_1	0.16714	0.0141097	0	0.0380101	0	0.0739068	0	0.57622	0.659055	1.72428	0.575761	1.19961
1.1.1.22: UDP-glucose 6-dehydrogenase|g__Muribaculaceae_unclassified.s__Muribaculaceae_bacterium_DSM_103720	0.909085	0.233387	0.827764	0.641437	2.20717	2.05212	1.84679	3.39109	0.49261	0.168224	0.0813914	0
1.1.1.22: UDP-glucose 6-dehydrogenase|g__Muribaculum.s__Muribaculum_intestinale	1.4286	2.1808	3.00744	2.03499	1.55401	0.343687	1.46142	0.849866	0.0314943	0.0816544	0.0173029	0.0786697
1.1.1.22: UDP-glucose 6-dehydrogenase|g__Parabacteroides.s__Parabacteroides_goldsteinii	0.474742	0.64164	1.44724	0.180169	1.41612	0.50377	0.858242	0.250211	0.352929	0.373625	0	0
1.1.1.22: UDP-glucose 6-dehydrogenase|g__Prevotella.s__Prevotella_sp_MGM2	0.330605	0.253837	0.987986	0.503419	0	0.083964	0	0	0.320268	0.041396	0.19355	0.319859
1.1.1.22: UDP-glucose 6-dehydrogenase|g__Ralstonia.s__Ralstonia_pickettii	0	0	0	0	0.0173309	0	0	0	0	0	0	0
1.1.1.22: UDP-glucose 6-dehydrogenase|unclassified	85.9197	46.5387	35.3283	36.7577	52.147	38.2402	37.0537	45.084	33.4219	44.4718	40.0556	37.99
1.1.1.23: Histidinol dehydrogenase	38.3909	34.1891	36.7928	40.2881	25.1979	28.0903	30.0234	31.4554	70.7465	62.2767	71.8191	54.8891
1.1.1.23: Histidinol dehydrogenase|g__Acutalibacter.s__Acutalibacter_muris	0.397084	0.273135	0.0749019	0.662175	0	0.142657	0	0.395457	0.180048	0.212201	0	0.0163555
1.1.1.23: Histidinol dehydrogenase|g__Akkermansia.s__Akkermansia_muciniphila	0	0	0	0	0	0	0.540908	0	0	0	0	0
1.1.1.23: Histidinol dehydrogenase|g__Anaerotruncus.s__Anaerotruncus_sp_G3_2012	0.0886788	0.0137245	0.0376368	0.0369726	0	0.186081	0	0	0.0819715	0.0710846	0.108455	0.0986201
1.1.1.23: Histidinol dehydrogenase|g__Asaccharobacter.s__Asaccharobacter_celatus	0	0	0	0.0523418	0	0	0	0	0	0	0	0
1.1.1.23: Histidinol dehydrogenase|g__Bacteroides.s__Bacteroides_caecimuris	0.0588272	0.163881	0	0	0	0	0.0389526	0.116292	0.0327385	0	0	0
1.1.1.23: Histidinol dehydrogenase|g__Bacteroides.s__Bacteroides_dorei	0	0	0	0	0	0	0.255081	0	0	0	0	0
1.1.1.23: Histidinol dehydrogenase|g__Bacteroides.s__Bacteroides_uniformis	0.364884	0.0271127	0.0371756	0.200857	0.298363	0.0994118	0.0579993	0.115456	0.178711	0	0.0892712	0
1.1.1.23: Histidinol dehydrogenase|g__Clostridium.s__Clostridium_sp_ASF356	0.760972	0.407363	0.335402	0	0	0.0284732	0	0.300903	0	0	0.0536943	0
1.1.1.23: Histidinol dehydrogenase|g__Clostridium.s__Clostridium_sp_ASF502	4.29734	5.09464	2.22181	0.990854	0	0	0	0.278195	7.4607	3.6547	2.52876	5.6444
1.1.1.23: Histidinol dehydrogenase|g__Dorea.s__Dorea_sp_5_2	0	0	0	0	0	0.314752	0	0	0.736078	0	0.719111	1.22611
1.1.1.23: Histidinol dehydrogenase|g__Enterorhabdus.s__Enterorhabdus_caecimuris	0	0	0	0.444252	0	0	0	0	0	0	0	0
1.1.1.23: Histidinol dehydrogenase|g__Eubacterium.s__Eubacterium_plexicaudatum	0	0	0	0	0	0.042815	0.854178	0	0	0	0	0
1.1.1.23: Histidinol dehydrogenase|g__Lachnospiraceae_unclassified.s__Lachnospiraceae_bacterium_10_1	0.4997	1.6516	0.76682	0.809141	0	0	0	0.650478	0	0.0565868	0	0
1.1.1.23: Histidinol dehydrogenase|g__Lachnospiraceae_unclassified.s__Lachnospiraceae_bacterium_28_4	0	0	0	0	0	0	0	0	12.5066	0.451363	13.042	11.109
1.1.1.23: Histidinol dehydrogenase|g__Lachnospiraceae_unclassified.s__Lachnospiraceae_bacterium_3_2	0	0	0.111254	0	0	0.113336	0	0.552813	0.129581	0.0699061	1.28233	0.275311
1.1.1.23: Histidinol dehydrogenase|g__Lachnospiraceae_unclassified.s__Lachnospiraceae_bacterium_A2	0.176047	0	3.26723	0.953815	0	0	0	1.16024	1.43621	1.41082	0	0
1.1.1.23: Histidinol dehydrogenase|g__Lachnospiraceae_unclassified.s__Lachnospiraceae_bacterium_A4	0	0.149486	0	2.10348	0	0.113881	0	0.0462957	1.12343	5.76968	3.81178	1.41491
1.1.1.23: Histidinol dehydrogenase|g__Lachnospiraceae_unclassified.s__Lachnospiraceae_bacterium_COE1	0	0	0	0	0	0.0284732	0.0387612	0.416662	0.0651552	0.168926	0	0.0651006
1.1.1.23: Histidinol dehydrogenase|g__Lachnospiraceae_unclassified.s__Lachnospiraceae_bacterium_M18_1	1.31063	0.21636	0.166881	0.108927	0	0.452939	0	0.0921387	1.53983	3.94989	1.08645	2.92874
1.1.1.23: Histidinol dehydrogenase|g__Mucispirillum.s__Mucispirillum_schaedleri	0	0	0	0	1.91149	1.13522	1.24806	1.32534	2.49853	4.57565	5.14267	4.05926
1.1.1.23: Histidinol dehydrogenase|g__Muribaculaceae_unclassified.s__Muribaculaceae_bacterium_DSM_103720	0.0296208	0	0	0	0.37852	0.317005	0.35319	2.6479	0.313337	0	0	0
1.1.1.23: Histidinol dehydrogenase|g__Muribaculum.s__Muribaculum_intestinale	1.28467	1.26074	2.2677	2.37287	1.49098	0.241429	0.947322	0.531096	0.0162489	0	0	0
1.1.1.23: Histidinol dehydrogenase|g__Olsenella.s__Olsenella_profusa	0	0	0	0.0337867	0	0	0	0	0	0	0	0
1.1.1.23: Histidinol dehydrogenase|g__Olsenella.s__Olsenella_scatoligenes	0	0	0	0.0168552	0	0	0	0	0	0	0	0
1.1.1.23: Histidinol dehydrogenase|g__Oscillibacter.s__Oscillibacter_sp_1_3	0	0.110344	0	0	0	0.0144496	0	0	0.264493	0.12859	0.145312	0
1.1.1.23: Histidinol dehydrogenase|g__Parabacteroides.s__Parabacteroides_goldsteinii	0.0444497	0.0963107	0.377304	0.111194	0.037852	0.0288273	0.0392433	0.0468716	0	0	0	0
1.1.1.23: Histidinol dehydrogenase|g__Prevotella.s__Prevotella_sp_MGM2	0.192125	0.192132	1.41135	0.757622	0	0.0575116	0	0	0.296109	0	0.415742	0
1.1.1.23: Histidinol dehydrogenase|unclassified	28.8859	24.5323	25.7174	30.633	21.0807	24.773	25.6497	22.7793	41.8867	41.7573	43.3935	28.0513
1.1.1.244: Methanol dehydrogenase	9.2883	0.571474	13.0559	7.86246	1.32845	1.27654	1.11194	6.36554	4.48004	3.23305	1.52642	0.213581
1.1.1.244: Methanol dehydrogenase|g__Lachnospiraceae_unclassified.s__Lachnospiraceae_bacterium_A2	0.51959	0.155389	12.3021	6.00115	0	0	0	5.75806	3.69648	1.67842	0	0
1.1.1.244: Methanol dehydrogenase|unclassified	8.76871	0.416085	0.753757	1.86131	1.32845	1.27654	1.11194	0.607478	0.783565	1.55463	1.52642	0.213581
1.1.1.25: Shikimate dehydrogenase	20.2218	28.5723	9.42818	12.4135	16.8187	15.6384	12.3553	13.2996	38.8766	43.8228	34.1878	31.106
1.1.1.25: Shikimate dehydrogenase|g__Acutalibacter.s__Acutalibacter_muris	0	0.658038	0	0.803157	0	0	0	0.490322	0	0.319484	0	0
1.1.1.25: Shikimate dehydrogenase|g__Anaerotruncus.s__Anaerotruncus_sp_G3_2012	0	0	0	0	0	0	0	0	0	0.223805	0.170694	0
1.1.1.25: Shikimate dehydrogenase|g__Bacteroides.s__Bacteroides_caecimuris	0.132952	0	0.135425	0.0332588	0.169037	0	0	0	0.266366	0	0	0
1.1.1.25: Shikimate dehydrogenase|g__Bacteroides.s__Bacteroides_dorei	0	0	0	0	0.959497	0.130502	0.355311	0	0	0	0	0
1.1.1.25: Shikimate dehydrogenase|g__Bacteroides.s__Bacteroides_uniformis	0.239314	0	0.0338563	0.199553	0.169827	0	0	0	0.177577	0	0	0
1.1.1.25: Shikimate dehydrogenase|g__Clostridium.s__Clostridium_sp_ASF502	2.01559	0.504702	2.0756	0.821445	0	0	0	0.214932	6.09712	2.93902	2.85281	4.20393
1.1.1.25: Shikimate dehydrogenase|g__Lachnospiraceae_unclassified.s__Lachnospiraceae_bacterium_10_1	0.200773	2.40216	0.681621	1.00398	0	0	0	0.423424	0	0	0	0
1.1.1.25: Shikimate dehydrogenase|g__Lachnospiraceae_unclassified.s__Lachnospiraceae_bacterium_28_4	0	0	0	0	0	0	0	0	8.90242	0.513082	8.20713	7.01905
1.1.1.25: Shikimate dehydrogenase|g__Lachnospiraceae_unclassified.s__Lachnospiraceae_bacterium_A2	0.0222248	0	0.933829	0.277984	0	0	0	0.0703073	0.889819	0.641273	0	0
1.1.1.25: Shikimate dehydrogenase|g__Lachnospiraceae_unclassified.s__Lachnospiraceae_bacterium_A4	0	0.0403722	0	0.570625	0	0.549823	0	0.240687	1.0404	3.93033	1.48881	0.89448
1.1.1.25: Shikimate dehydrogenase|g__Lachnospiraceae_unclassified.s__Lachnospiraceae_bacterium_COE1	0	0	0	0	0	0	0	0.317568	0	0	0	0
1.1.1.25: Shikimate dehydrogenase|g__Lachnospiraceae_unclassified.s__Lachnospiraceae_bacterium_M18_1	3.07672	1.88317	0.432537	0.113308	0	0	0	0.394042	0.730668	1.69849	0.803237	1.81241
1.1.1.25: Shikimate dehydrogenase|g__Mucispirillum.s__Mucispirillum_schaedleri	0	0	0	0	1.00562	0.932897	0.9452	0.467113	1.64302	3.38445	1.8341	2.16115
1.1.1.25: Shikimate dehydrogenase|g__Parabacteroides.s__Parabacteroides_goldsteinii	0.10732	0.397352	0.307452	0.201351	0.274171	0.208803	0.0355311	0	0.298583	0	0	0
1.1.1.25: Shikimate dehydrogenase|g__Turicimonas.s__Turicimonas_muris	0.382415	1.50935	1.2792	1.16682	4.88655	0.628265	4.84355	1.05758	0	0	0	0
1.1.1.25: Shikimate dehydrogenase|unclassified	14.0445	21.1771	3.54865	7.22202	9.35395	13.1881	6.17569	9.62359	18.8306	30.1729	18.831	15.0149
1.1.1.251: Galactitol-1-phosphate 5-dehydrogenase	0	0	0	0	0.327712	0	0	0	1.41142	0.641554	0.836742	1.07567
1.1.1.251: Galactitol-1-phosphate 5-dehydrogenase|unclassified	0	0	0	0	0.327712	0	0	0	1.41142	0.641554	0.836742	1.07567
1.1.1.26: Glyoxylate reductase	3.20805	4.11731	9.0474	5.15232	1.71119	1.64407	1.90078	1.83094	1.00104	0.925078	0.735011	0.939951
1.1.1.26: Glyoxylate reductase|g__Anaerotruncus.s__Anaerotruncus_sp_G3_2012	0.1599	0.0185604	0	0.549343	0.408497	0.563874	0.0794084	0.568924	0	0.230715	0.635563	0
1.1.1.26: Glyoxylate reductase|g__Clostridium.s__Clostridium_sp_ASF356	2.27621	2.71779	2.84708	0	0.493163	0.395075	1.23831	0.482277	0	0.254206	0.0994475	0
1.1.1.26: Glyoxylate reductase|g__Parabacteroides.s__Parabacteroides_goldsteinii	0	0	0.819844	0	0	0	0	0	0.246045	0	0	0
1.1.1.26: Glyoxylate reductase|unclassified	0.771941	1.38096	5.38048	4.60297	0.809527	0.685124	0.583057	0.779739	0.754991	0.440157	0	0.939951
1.1.1.261: sn-glycerol-1-phosphate dehydrogenase	1.87391	2.01884	1.00458	2.67399	1.63361	2.10239	1.93123	1.61805	1.56668	2.49446	1.61209	0.907639
[truncated: 12,403 more rows]
